# Supplementary material for: Comparative Analysis of the Effect of Gamma-, Electron, and Proton Irradiation on Transcriptomic Profile of Hordeum vulgare L. Seedlings: In Search for Molecular Contributors to Abiotic Stress Resilience
Source: MDPI journal article supplement (doi:10.3390/plants13030342), 2024-01-23
Supplement: s1 [file s1]

## Legend

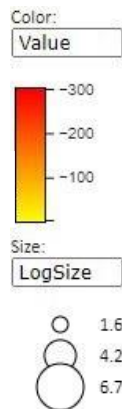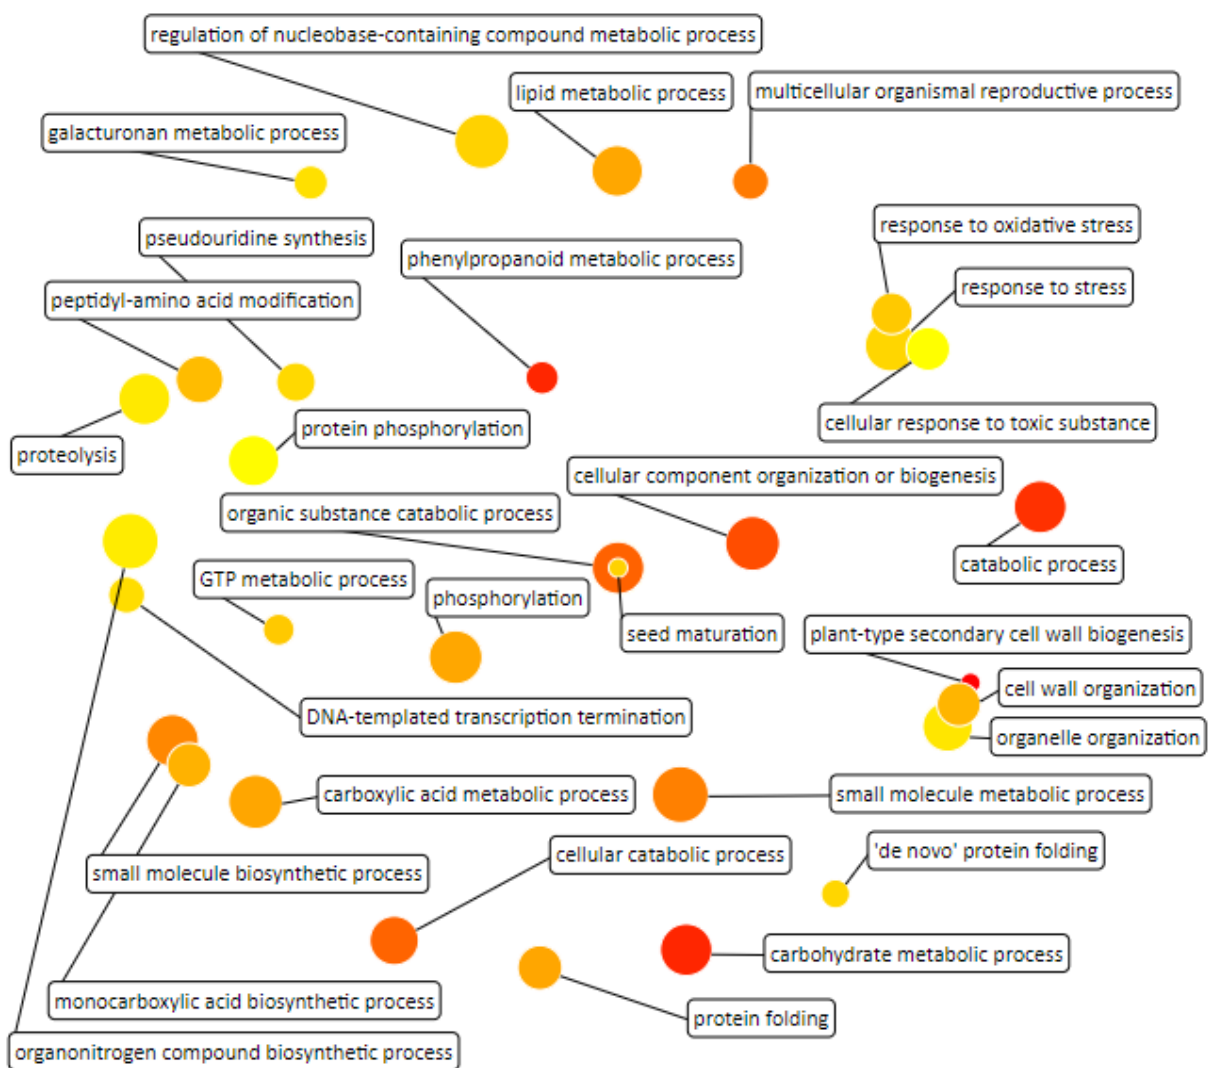

**Figure S1.** Scheme of the most significantly enriched GO terms for upregulated DEGs shared between  $\gamma$ -radiation and electron beam in terms of Biological Process, visualized by REVIGO.

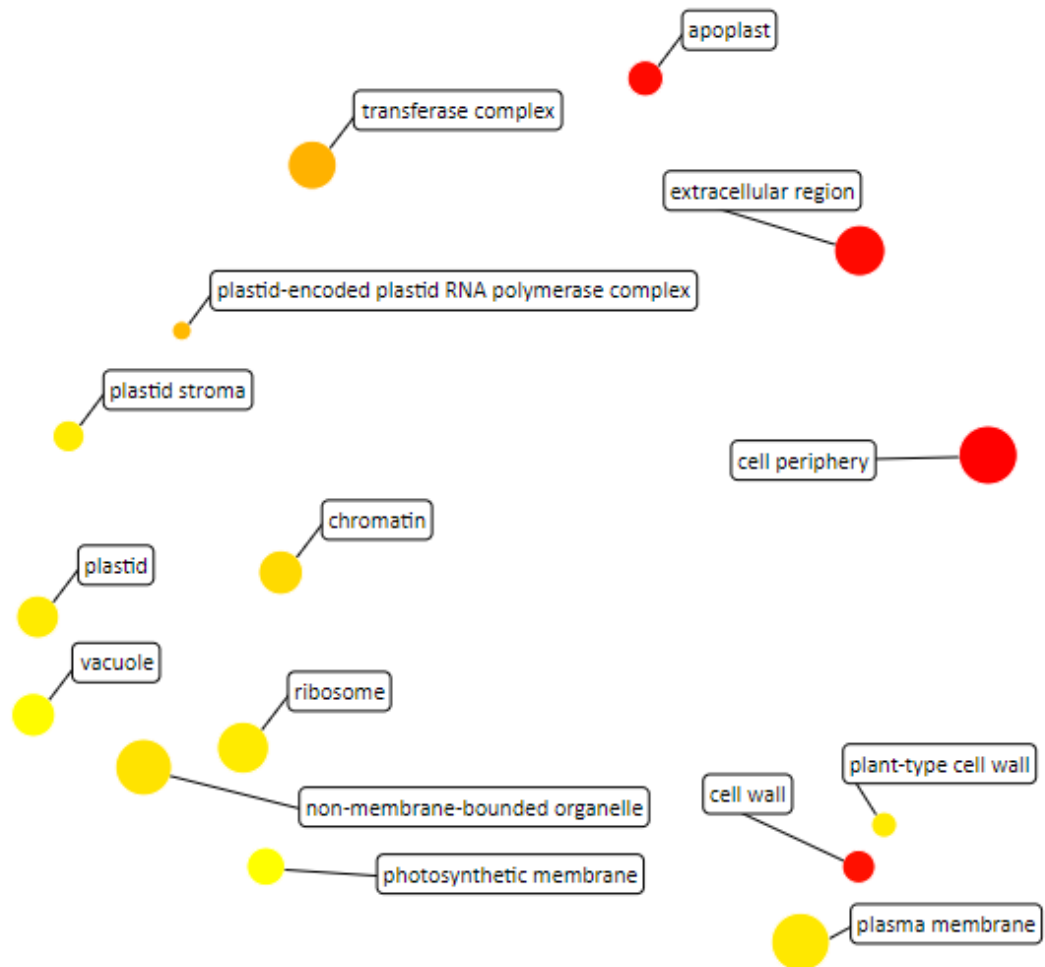

**Figure S2.** Scheme of the most significantly enriched GO terms for upregulated DEGs shared between  $\gamma$ -radiation and electron beam in terms of Cellular Component, visualized by REVIGO.

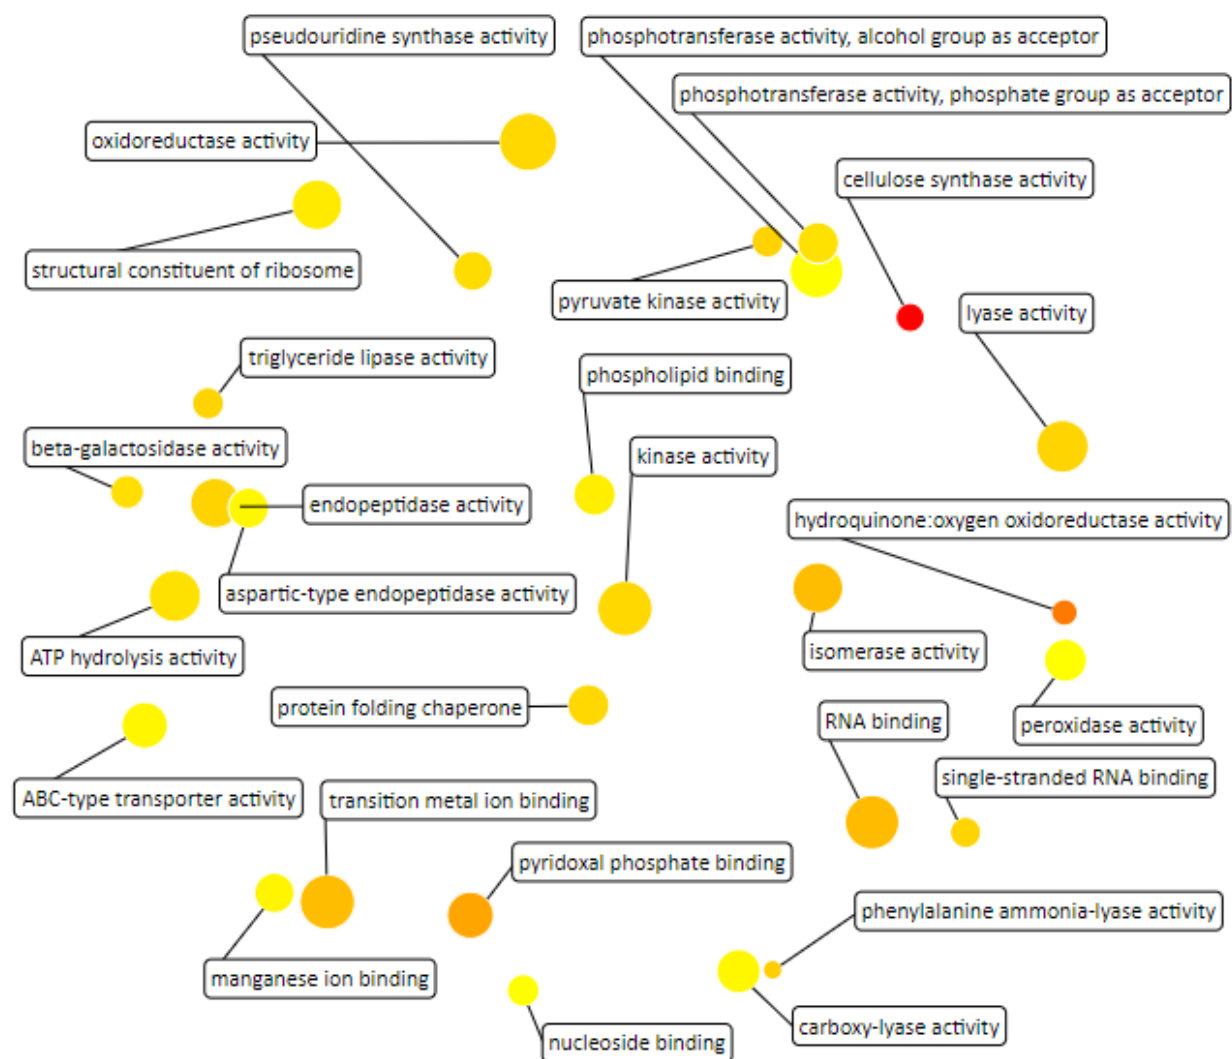

**Figure S3.** Scheme of the most significantly enriched GO terms for upregulated DEGs shared between  $\gamma$ -radiation and electron beam in terms of Molecular Function, visualized by REVIGO.

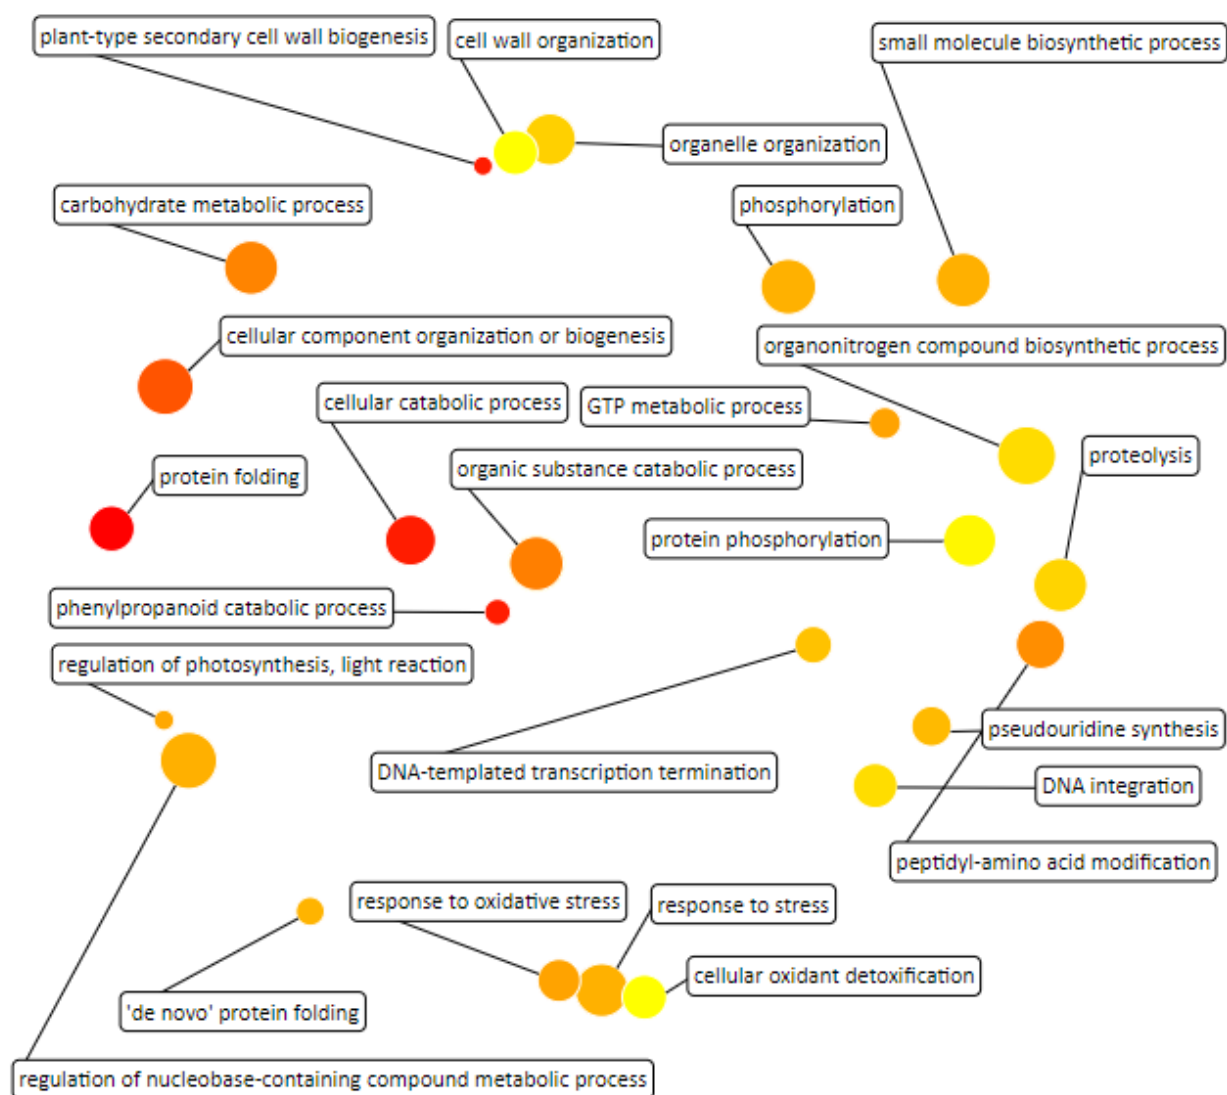

**Figure S4.** Scheme of the most significantly enriched GO terms for upregulated DEGs shared between  $\gamma$ -radiation and proton beam in terms of Biological Process, visualized by REVIGO.

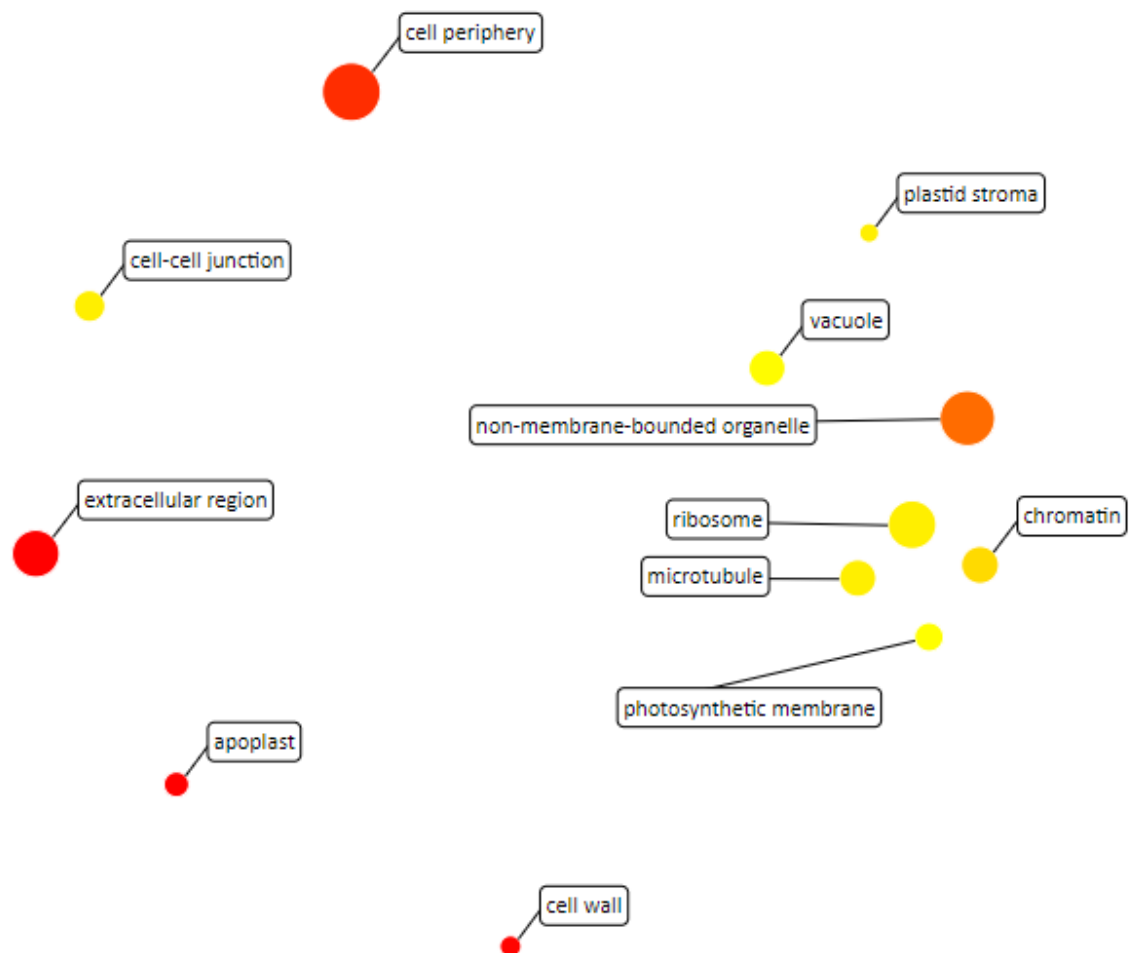

**Figure S5.** Scheme of the most significantly enriched GO terms for upregulated DEGs shared between  $\gamma$ -radiation and proton beam in terms of Cellular Component, visualized by REVIGO.

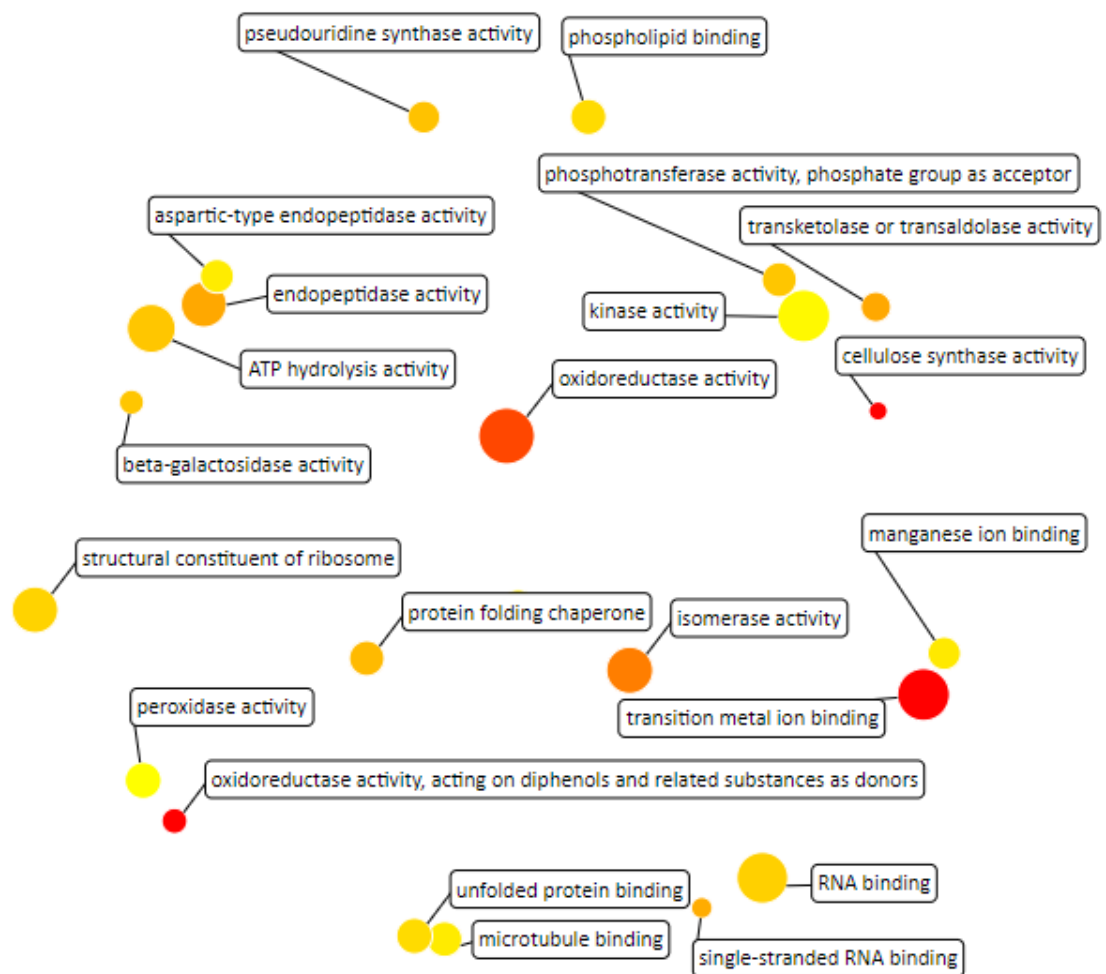

**Figure S6.** Scheme of the most significantly enriched GO terms for upregulated DEGs shared between  $\gamma$ -radiation and proton beam in terms of Molecular Function, visualized by REVIGO.

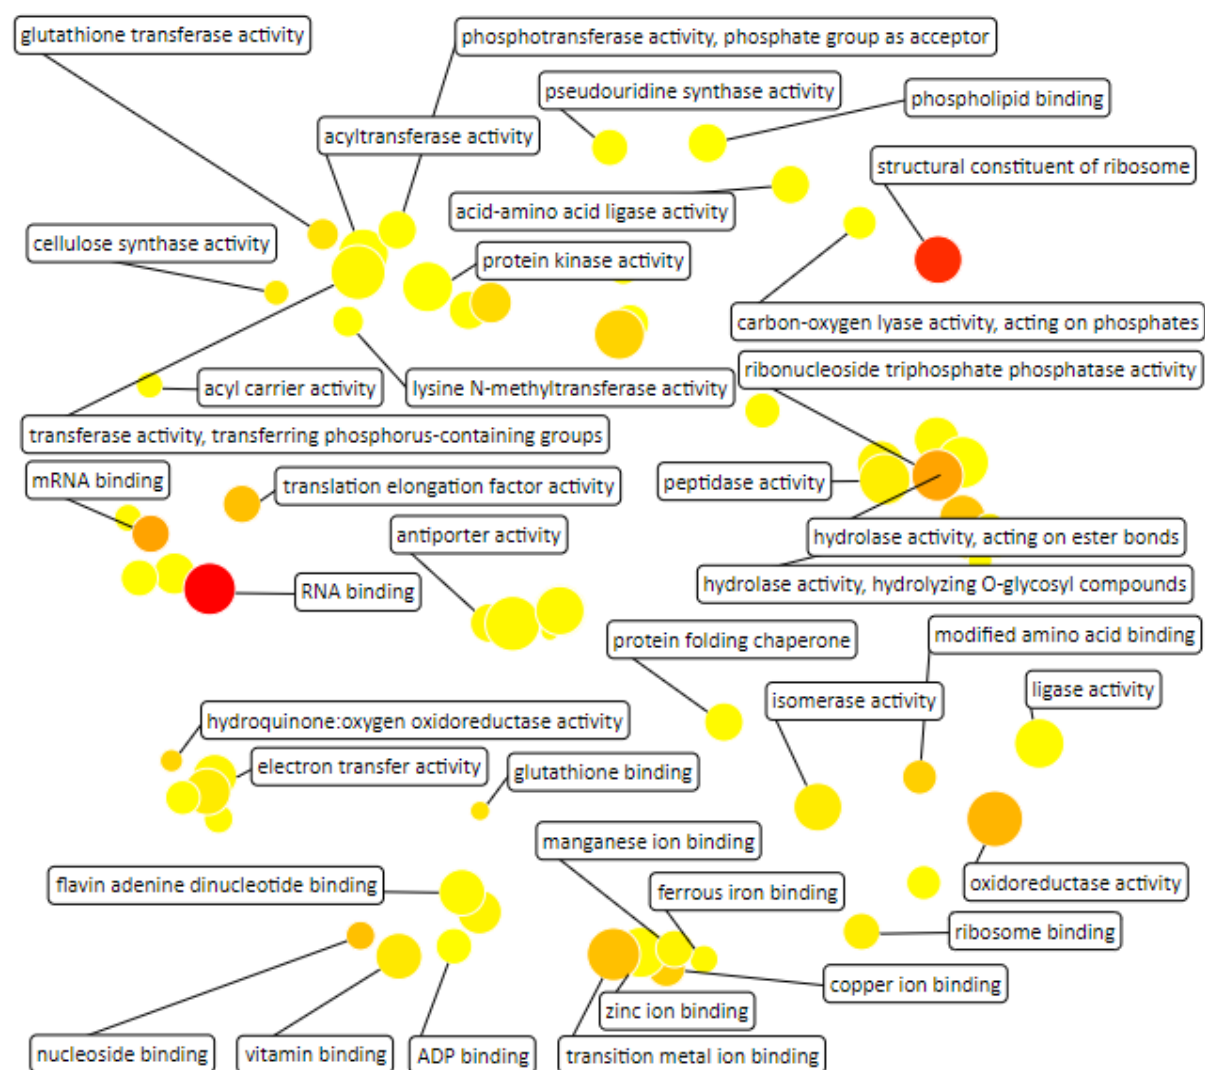

**Figure S7.** Scheme of the most significantly enriched GO terms for upregulated DEGs shared between electron and proton beam in terms of Molecular Function, visualized by REVIGO.

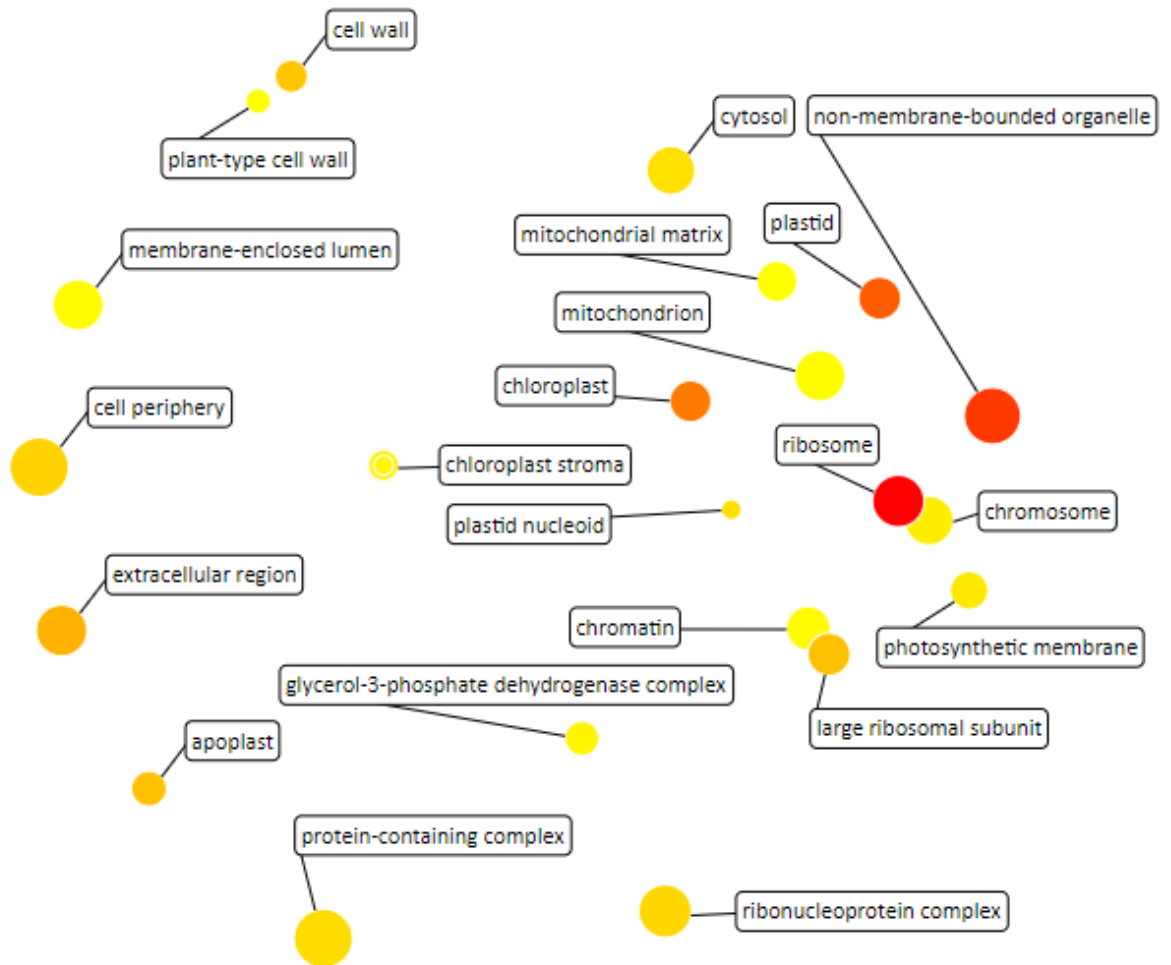

**Figure S8.** Scheme of the most significantly enriched GO terms for upregulated DEGs shared between electron and proton beam in terms of Cellular Component, visualized by REVIGO.





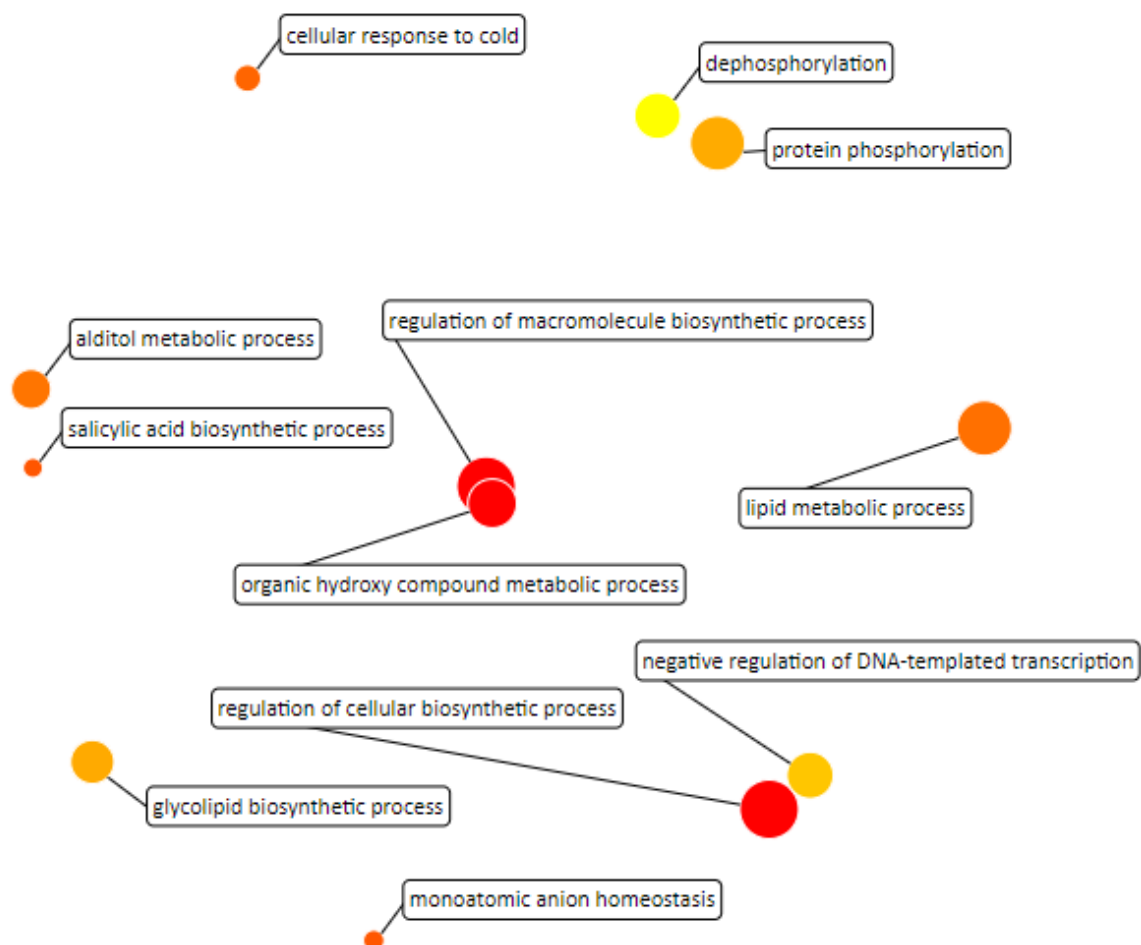

**Figure S10.** Scheme of the most significantly enriched GO terms for downregulated DEGs shared between electron and proton beam in terms of Biological Process, visualized by REVIGO.

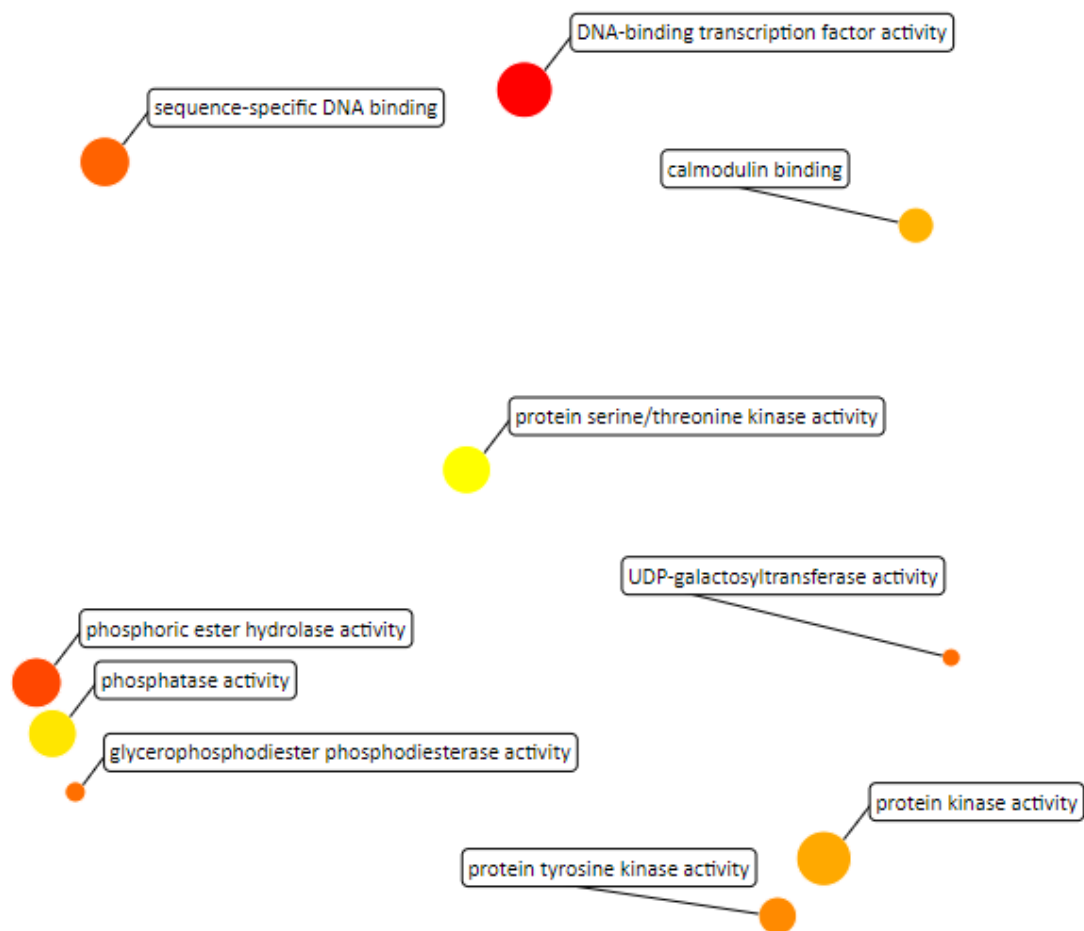

**Figure S11.** Scheme of the most significantly enriched GO terms for downregulated DEGs shared between electron and proton beam in terms of Molecular Function, visualized by REVIGO.

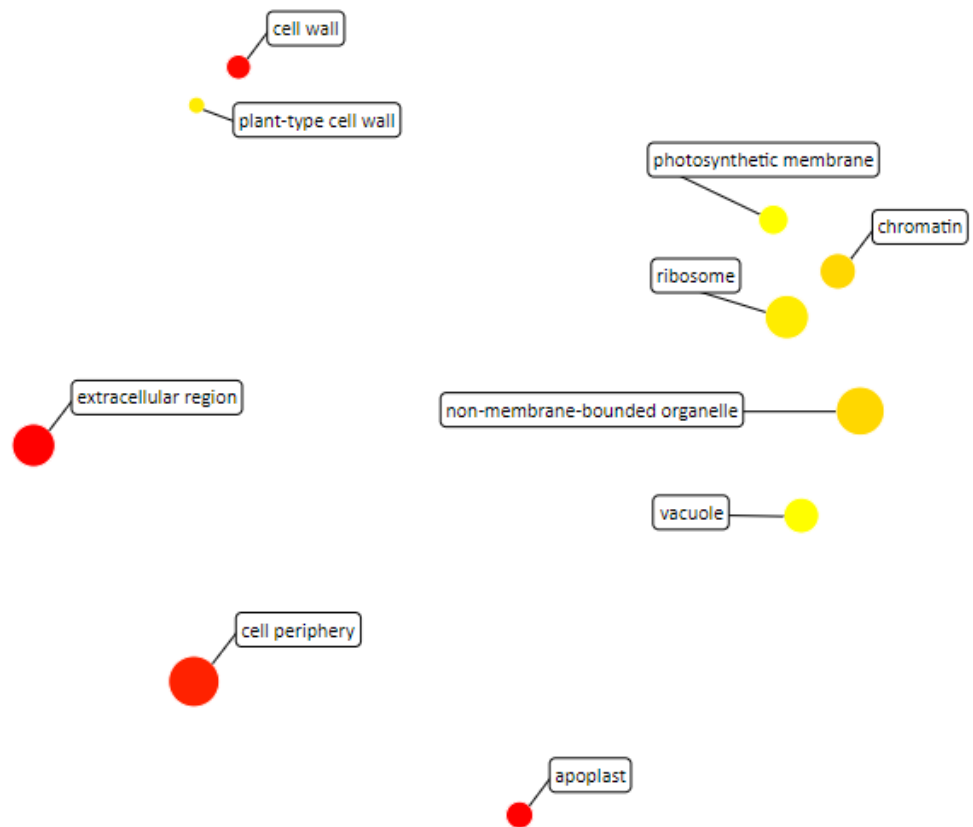

**Figure S12.** Scheme of the most significantly enriched GO terms shared among all types of radiation applied in terms of Cellular Component, visualized by REVIGO.

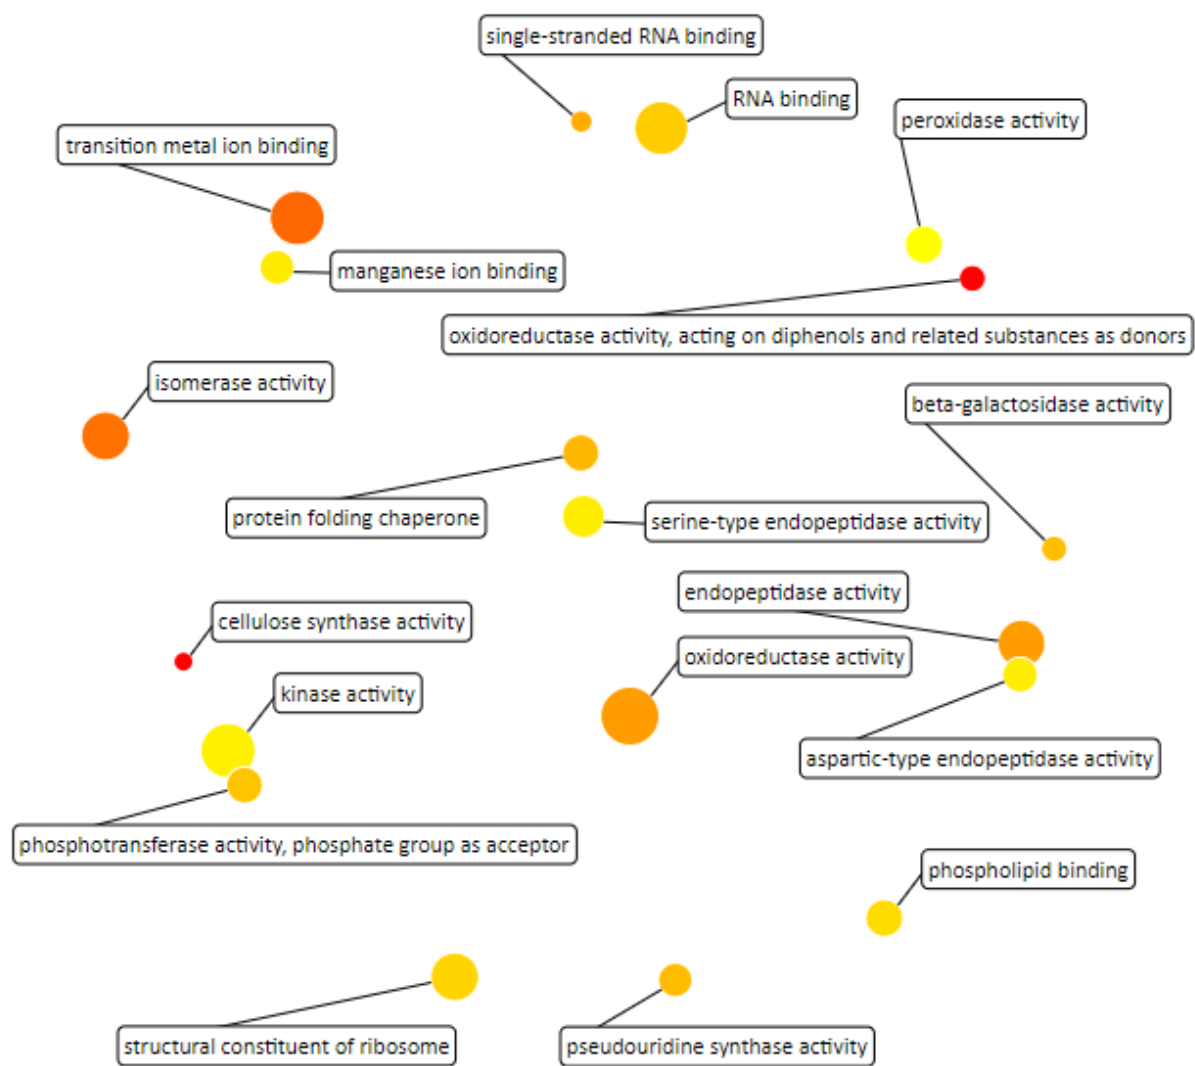

**Figure S13.** Scheme of the most significantly enriched GO terms shared among all types of radiation applied in terms of Molecular Function, visualized by REVIGO.

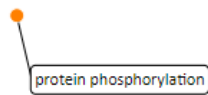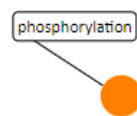

**Figure S14.** Scheme of the most significantly enriched GO terms for downregulated DEGs shared between  $\gamma$ -radiation and electron beam in terms of Biological Process, visualized by REVIGO.

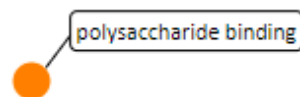

**Figure S15.** Scheme of the most significantly enriched GO terms for downregulated DEGs shared between  $\gamma$ -radiation and electron beam in terms of Molecular Function, visualized by REVIGO.

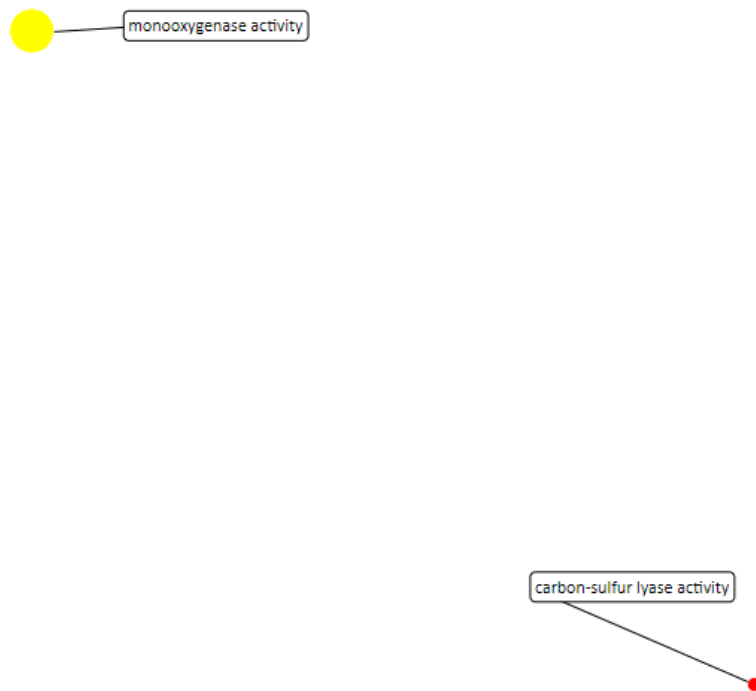

**Figure S16.** Scheme of the most significantly enriched GO terms for downregulated DEGs shared between  $\gamma$ -radiation and proton beam in terms of Molecular Function, visualized by REVIGO.

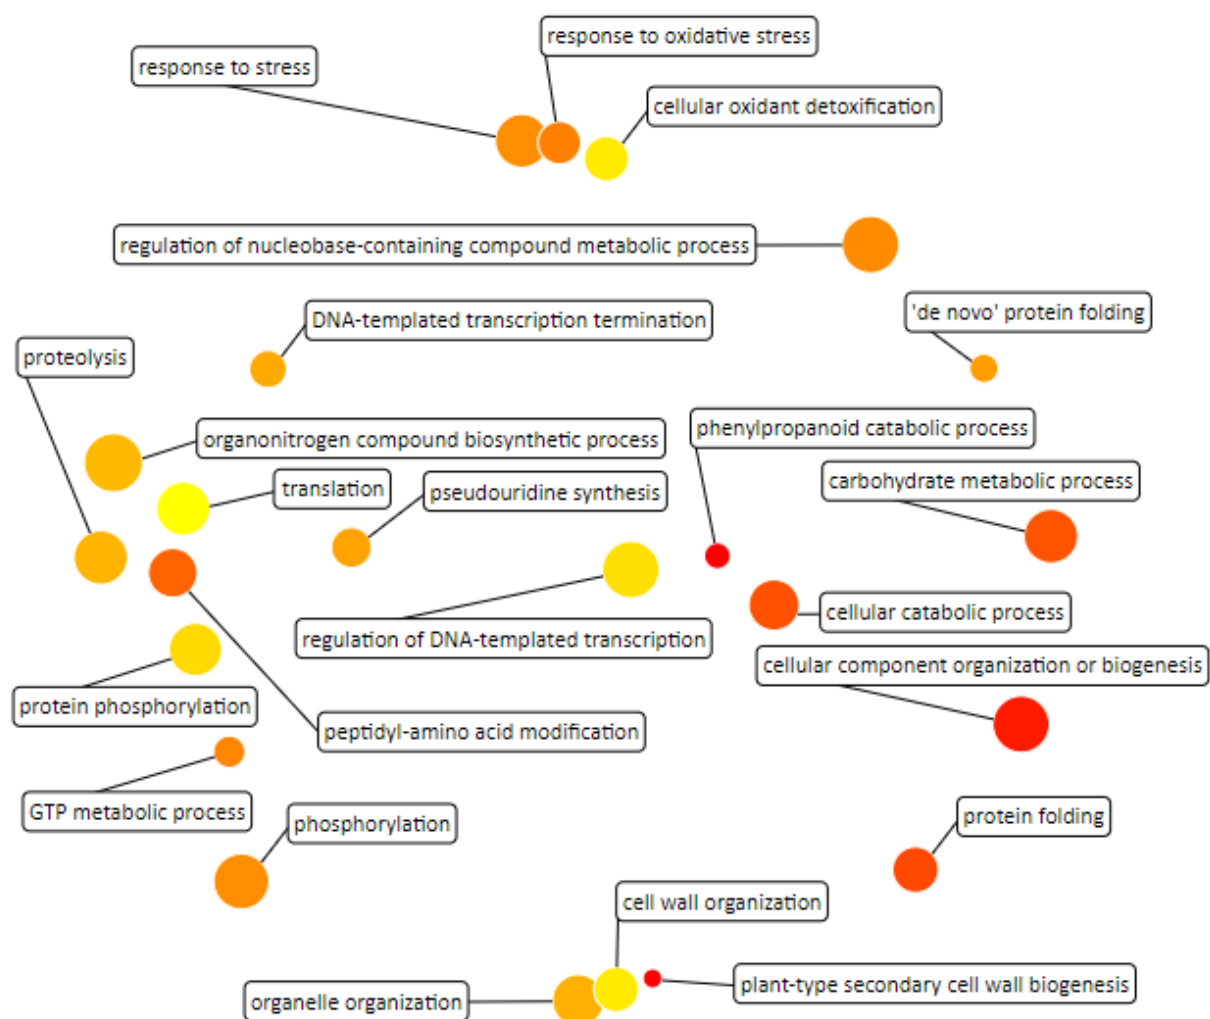

**Figure S17.** Scheme of the most significantly enriched GO terms shared among all types of radiation applied in terms of Biological Process, visualized by REVIGO.
