# Supplementary material for: Comparative Analysis of the Effect of Gamma-, Electron, and Proton Irradiation on Transcriptomic Profile of Hordeum vulgare L. Seedlings: In Search for Molecular Contributors to Abiotic Stress Resilience
Source: Plants (Basel). 2024 Jan 23;13(3):342. doi: 10.3390/plants13030342 (PMC10857502; doi:10.3390/plants13030342)
Supplement: Supplementary file 1 [file plants-13-00342-s001.zip]

Archive with 4 entries (4 files):
- Figures_S1-S17_GO_terms visualization.pdf
- Supplementary table S1_DEGs and groupings by impact.xlsx
- Supplementary table S2_GO enrichment.xlsx
- Supplementary table S3_20 groups of protein products.xlsx
