# Supplementary material for: Comparative Analysis of the Effect of Gamma-, Electron, and Proton Irradiation on Transcriptomic Profile of Hordeum vulgare L. Seedlings: In Search for Molecular Contributors to Abiotic Stress Resilience
Source: Plants (Basel). 2024 Jan 23;13(3):342. doi: 10.3390/plants13030342 (PMC10857502; doi:10.3390/plants13030342)
Supplement: Supplementary file 1 [file plants-13-00342-s001.zip › Supplementary table S1_DEGs and groupings by impact.xlsx]

## Sheet: Annotation
Gene ID and Annotation
BaRTv2 Gene ID	Annotation
BaRT2v18chr1HG000020
BaRT2v18chr1HG000020	50S ribosomal protein L28, chloroplastic
BaRT2v18chr1HG000030
BaRT2v18chr1HG000040
BaRT2v18chr1HG000040
BaRT2v18chr1HG000050	Peroxin-14
BaRT2v18chr1HG000050	Peroxin-14
BaRT2v18chr1HG000050
BaRT2v18chr1HG000050	Peroxin-14
BaRT2v18chr1HG000050
BaRT2v18chr1HG000050	Peroxin-14
BaRT2v18chr1HG000050	Peroxin-14
BaRT2v18chr1HG000050
BaRT2v18chr1HG000050	Peroxin-14
BaRT2v18chr1HG000050
BaRT2v18chr1HG000050
BaRT2v18chr1HG000050	Peroxin-14
BaRT2v18chr1HG000050
BaRT2v18chr1HG000050
BaRT2v18chr1HG000050	Peroxin-14
BaRT2v18chr1HG000050	Peroxin-14
BaRT2v18chr1HG000050	Peroxin-14
BaRT2v18chr1HG000050
BaRT2v18chr1HG000060	E3 ubiquitin-protein ligase SIS3
BaRT2v18chr1HG000060
BaRT2v18chr1HG000060
BaRT2v18chr1HG000060	E3 ubiquitin-protein ligase SIS3;RING-finger ubiquitin ligase
BaRT2v18chr1HG000060
BaRT2v18chr1HG000060
BaRT2v18chr1HG000060
BaRT2v18chr1HG000060
BaRT2v18chr1HG000060
BaRT2v18chr1HG000070
BaRT2v18chr1HG000070
BaRT2v18chr1HG000070
BaRT2v18chr1HG000070
BaRT2v18chr1HG000070
BaRT2v18chr1HG000070
BaRT2v18chr1HG000070
BaRT2v18chr1HG000070
BaRT2v18chr1HG000070
BaRT2v18chr1HG000070
BaRT2v18chr1HG000070
BaRT2v18chr1HG000070
BaRT2v18chr1HG000080
BaRT2v18chr1HG000080	Nucleic acid-binding, OB-fold protein;Replication factor A1
BaRT2v18chr1HG000080	Nucleic acid-binding, OB-fold protein;Replication factor A1
BaRT2v18chr1HG000090
BaRT2v18chr1HG000090	Proline-rich receptor-like protein kinase PERK10;Putative serine/threonine-protein kinase At1g01540 family;Proline-rich receptor-like protein kinase PERK8;proline-rich receptor-like protein kinase PERK9;Protein kinase domain-containing protein;Proline-rich receptor-like protein kinase PERK7
BaRT2v18chr1HG000090	Proline-rich receptor-like protein kinase PERK10;Putative serine/threonine-protein kinase At1g01540 family;Proline-rich receptor-like protein kinase PERK8;proline-rich receptor-like protein kinase PERK9;Protein kinase domain-containing protein;Proline-rich receptor-like protein kinase PERK7
BaRT2v18chr1HG000090	Proline-rich receptor-like protein kinase PERK10;Putative serine/threonine-protein kinase At1g01540 family;Proline-rich receptor-like protein kinase PERK8;proline-rich receptor-like protein kinase PERK9;Protein kinase domain-containing protein;Proline-rich receptor-like protein kinase PERK7
BaRT2v18chr1HG000090	Proline-rich receptor-like protein kinase PERK10;Proline-rich receptor-like protein kinase PERK8;proline-rich receptor-like protein kinase PERK9;Protein kinase domain-containing protein;Proline-rich receptor-like protein kinase PERK7
BaRT2v18chr1HG000100
BaRT2v18chr1HG000100
BaRT2v18chr1HG000100
BaRT2v18chr1HG000110
BaRT2v18chr1HG000110	Secologanin synthase;Cytochrome P450 family 72 subfamily A polypeptide 8
BaRT2v18chr1HG000110	Putative secologanin synthase
BaRT2v18chr1HG000110	Secologanin synthase;Cytochrome P450 family 72 subfamily A polypeptide 8
BaRT2v18chr1HG000110
BaRT2v18chr1HG000120	Phospholipid-transporting ATPase
BaRT2v18chr1HG000120
BaRT2v18chr1HG000120	Phospholipid-transporting ATPase
BaRT2v18chr1HG000130
BaRT2v18chr1HG000140	Paired amphipathic helix protein Sin3-like 3
BaRT2v18chr1HG000140	Paired amphipathic helix protein Sin3-like 3
BaRT2v18chr1HG000140	Paired amphipathic helix protein Sin3-like 3
BaRT2v18chr1HG000140
BaRT2v18chr1HG000140	Paired amphipathic helix protein Sin3-like 3
BaRT2v18chr1HG000140
BaRT2v18chr1HG000150
BaRT2v18chr1HG000150
BaRT2v18chr1HG000150	Glycosyltransferase-like KOBITO 1;Glycosyltransferase family 92 protein;Glycosyltransferase-like
BaRT2v18chr1HG000150
BaRT2v18chr1HG000160	NB-ARC domain-containing protein;NBS-LRR class RGA
BaRT2v18chr1HG000160	NB-ARC domain-containing protein;NBS-LRR class RGA
BaRT2v18chr1HG000160	NB-ARC domain-containing protein;NBS-LRR class RGA
BaRT2v18chr1HG000160
BaRT2v18chr1HG000160	NB-ARC domain-containing protein;NBS-LRR class RGA
BaRT2v18chr1HG000160	NB-ARC domain-containing protein;NBS-LRR class RGA
BaRT2v18chr1HG000170
BaRT2v18chr1HG000180
BaRT2v18chr1HG000190	Horcolin;Jacalin-type lectin domain-containing protein;Salt stress-induced protein
BaRT2v18chr1HG000190
BaRT2v18chr1HG000200
BaRT2v18chr1HG000210
BaRT2v18chr1HG000220	LRR receptor-like serine/threonine-protein kinase GSO1;Leucine-rich repeat receptor protein kinase EMS1;Leucine Rich Repeat family protein, expressed
BaRT2v18chr1HG000230
BaRT2v18chr1HG000230
BaRT2v18chr1HG000230
BaRT2v18chr1HG000240
BaRT2v18chr1HG000240
BaRT2v18chr1HG000240
BaRT2v18chr1HG000240
BaRT2v18chr1HG000240
BaRT2v18chr1HG000240
BaRT2v18chr1HG000240
BaRT2v18chr1HG000240
BaRT2v18chr1HG000250
BaRT2v18chr1HG000260	PMD domain-containing protein
BaRT2v18chr1HG000260
BaRT2v18chr1HG000270
BaRT2v18chr1HG000280
BaRT2v18chr1HG000290
BaRT2v18chr1HG000290
BaRT2v18chr1HG000290	Horcolin;Jacalin-type lectin domain-containing protein;Salt stress-induced protein
BaRT2v18chr1HG000300
BaRT2v18chr1HG000310
BaRT2v18chr1HG000320	Fatty acyl-CoA reductase
BaRT2v18chr1HG000320
BaRT2v18chr1HG000320	Fatty acyl-CoA reductase
BaRT2v18chr1HG000320	Fatty acyl-CoA reductase
BaRT2v18chr1HG000320	Fatty acyl-CoA reductase
BaRT2v18chr1HG000320	Fatty acyl-CoA reductase
BaRT2v18chr1HG000320
BaRT2v18chr1HG000320
BaRT2v18chr1HG000320
BaRT2v18chr1HG000330
BaRT2v18chr1HG000340
BaRT2v18chr1HG000340
BaRT2v18chr1HG000340	Diacylglycerol O-acyltransferase
BaRT2v18chr1HG000340	Diacylglycerol O-acyltransferase
BaRT2v18chr1HG000340	Diacylglycerol O-acyltransferase
BaRT2v18chr1HG000340	Diacylglycerol O-acyltransferase
BaRT2v18chr1HG000350	Agmatine coumaroyltransferase-1;Taxadien-5-alpha-ol O-acetyltransferase;HXXXD-type acyl-transferase family protein
BaRT2v18chr1HG000360	Fatty acyl-CoA reductase
BaRT2v18chr1HG000370
BaRT2v18chr1HG000380	Transposon protein, CACTA, En/Spm sub-class;DUF4218 domain-containing protein (Fragment)
BaRT2v18chr1HG000390
BaRT2v18chr1HG000400
BaRT2v18chr1HG000410
BaRT2v18chr1HG000410
BaRT2v18chr1HG000410
BaRT2v18chr1HG000410
BaRT2v18chr1HG000410
BaRT2v18chr1HG000410	Fatty acyl-CoA reductase
BaRT2v18chr1HG000410	Fatty acyl-CoA reductase
BaRT2v18chr1HG000410
BaRT2v18chr1HG000410
BaRT2v18chr1HG000420	Alpha/beta-Hydrolases superfamily protein
BaRT2v18chr1HG000420	Putative hydrolase YugF;AB hydrolase-1 domain-containing protein;Alpha/beta-Hydrolases superfamily protein;monoacylglycerol lipase ABHD6
BaRT2v18chr1HG000420	Alpha/beta-Hydrolases superfamily protein;Putative hydrolase YugF;AB hydrolase-1 domain-containing protein;Alpha/beta hydrolase-1
BaRT2v18chr1HG000420	2-hydroxy-6-oxononadienedioate/2-hydroxy-6- oxononatrienedioate hydrolase-like;Putative hydrolase YugF;Alpha/beta-Hydrolases superfamily protein;AB hydrolase-1 domain-containing protein;Monoacylglycerol lipase ABHD6
BaRT2v18chr1HG000420	2-hydroxy-6-oxononadienedioate/2-hydroxy-6- oxononatrienedioate hydrolase-like;Alpha/beta-Hydrolases superfamily protein;Putative hydrolase YugF;Alpha/beta hydrolase-1;AB hydrolase-1 domain-containing protein
BaRT2v18chr1HG000430	Acyltransferase-like protein chloroplastic;Esterase/lipase/thioesterase-like protein
BaRT2v18chr1HG000430	Acyltransferase-like protein chloroplastic;Esterase/lipase/thioesterase-like protein
BaRT2v18chr1HG000430
BaRT2v18chr1HG000430
BaRT2v18chr1HG000430
BaRT2v18chr1HG000430
BaRT2v18chr1HG000440	SNF1-related protein kinase regulatory subunit beta-3;AMPKBI domain-containing protein;Beta subunit 3 of SnRK1;Putative association with the SNF1 complex (ASC) domain-containing protein
BaRT2v18chr1HG000450
BaRT2v18chr1HG000460	Neprosin domain-containing protein
BaRT2v18chr1HG000470
BaRT2v18chr1HG000470	23 kDa jasmonate-induced protein-like;Jasmonate-induced protein
BaRT2v18chr1HG000470
BaRT2v18chr1HG000480
BaRT2v18chr1HG000490	Jasmonate induced protein
BaRT2v18chr1HG000490
BaRT2v18chr1HG000490
BaRT2v18chr1HG000500	Jasmonate induced protein
BaRT2v18chr1HG000510	23 kDa jasmonate-induced protein-like
BaRT2v18chr1HG000510	23 kDa jasmonate-induced protein-like;Jasmonate-induced protein
BaRT2v18chr1HG000510
BaRT2v18chr1HG000520
BaRT2v18chr1HG000520	Chalcone-flavonone isomerase family protein
BaRT2v18chr1HG000520
BaRT2v18chr1HG000520
BaRT2v18chr1HG000530	Putative LRR receptor-like serine/threonine-protein kinase;Putative leucine-rich repeat receptor-like protein kinase
BaRT2v18chr1HG000540	vacuolar protein sorting-associated protein 60.2;Charged multivesicular body protein 5
BaRT2v18chr1HG000540	vacuolar protein sorting-associated protein 60.2;Charged multivesicular body protein 5
BaRT2v18chr1HG000540	vacuolar protein sorting-associated protein 60.2;Charged multivesicular body protein 5
BaRT2v18chr1HG000540	vacuolar protein sorting-associated protein 60.2;Charged multivesicular body protein 5
BaRT2v18chr1HG000540	vacuolar protein sorting-associated protein 60.2;Charged multivesicular body protein 5
BaRT2v18chr1HG000550
BaRT2v18chr1HG000550	Protein kinase domain-containing protein
BaRT2v18chr1HG000550	Protein kinase domain-containing protein
BaRT2v18chr1HG000560	Putative RNA recognition motif 2, nucleotide-binding alpha-beta plait domain-containing protein;Meiosis protein mei2
BaRT2v18chr1HG000570
BaRT2v18chr1HG000570	TAF domain-containing protein;Transcription initiation factor TFIID subunit 6;TATA box binding protein associated factor TAF
BaRT2v18chr1HG000570	TAF domain-containing protein;Transcription initiation factor TFIID subunit 6;TATA box binding protein associated factor TAF
BaRT2v18chr1HG000570	TAF domain-containing protein;Transcription initiation factor TFIID subunit 6;TATA box binding protein associated factor TAF
BaRT2v18chr1HG000570	TAF domain-containing protein;Transcription initiation factor TFIID subunit 6;TATA box binding protein associated factor TAF
BaRT2v18chr1HG000580
BaRT2v18chr1HG000580
BaRT2v18chr1HG000580
BaRT2v18chr1HG000580
BaRT2v18chr1HG000580
BaRT2v18chr1HG000580
BaRT2v18chr1HG000590	Exonuclease domain-containing protein
BaRT2v18chr1HG000600	Protein kinase domain-containing protein
BaRT2v18chr1HG000610
BaRT2v18chr1HG000610
BaRT2v18chr1HG000610
BaRT2v18chr1HG000610
BaRT2v18chr1HG000610
BaRT2v18chr1HG000610
BaRT2v18chr1HG000610
BaRT2v18chr1HG000610
BaRT2v18chr1HG000610
BaRT2v18chr1HG000610
BaRT2v18chr1HG000610
BaRT2v18chr1HG000610
BaRT2v18chr1HG000610
BaRT2v18chr1HG000610
BaRT2v18chr1HG000610
BaRT2v18chr1HG000610
BaRT2v18chr1HG000610
BaRT2v18chr1HG000620	Zinc finger, CCHC-type (Fragment)
BaRT2v18chr1HG000630	Gamma-gliadin;Gamma prolamin;Gamma gliadin;Putative gamma-gliadin
BaRT2v18chr1HG000630	Gamma-gliadin (Fragment);Gamma prolamin (Fragment);Putative omega secalin
BaRT2v18chr1HG000640
BaRT2v18chr1HG000650	Gamma 3 hordein;Putative gamma-gliadin;Gamma prolamin (Fragment);Gamma-gliadin
BaRT2v18chr1HG000650	Gamma 3 hordein;Avenin;Putative gamma-gliadin;Gamma prolamin (Fragment);Gamma-gliadin
BaRT2v18chr1HG000660
BaRT2v18chr1HG000670	Gamma gliadin;Gamma prolamin;75k gamma secalin;Gamma-gliadin;Putative gamma-gliadin
BaRT2v18chr1HG000670	75k gamma secalin;Gamma gliadin;Gamma prolamin;Putative gamma-gliadin;Gamma-gliadin
BaRT2v18chr1HG000680
BaRT2v18chr1HG000680
BaRT2v18chr1HG000690	Peptidyl-prolyl cis-trans isomerase
BaRT2v18chr1HG000690
BaRT2v18chr1HG000690
BaRT2v18chr1HG000690	Peptidyl-prolyl cis-trans isomerase
BaRT2v18chr1HG000690
BaRT2v18chr1HG000690
BaRT2v18chr1HG000690
BaRT2v18chr1HG000690
BaRT2v18chr1HG000690	Peptidyl-prolyl cis-trans isomerase
BaRT2v18chr1HG000690
BaRT2v18chr1HG000690
BaRT2v18chr1HG000700	Gamma-gliadin;Gamma gliadin;Gamma prolamin
BaRT2v18chr1HG000710	ABC transmembrane type-1 domain-containing protein (Fragment)
BaRT2v18chr1HG000720
BaRT2v18chr1HG000720
BaRT2v18chr1HG000730
BaRT2v18chr1HG000740
BaRT2v18chr1HG000750
BaRT2v18chr1HG000760
BaRT2v18chr1HG000770	Mannan endo-1,4-beta-mannosidase
BaRT2v18chr1HG000770	Mannan endo-1,4-beta-mannosidase
BaRT2v18chr1HG000770	Mannan endo-1,4-beta-mannosidase
BaRT2v18chr1HG000770	Mannan endo-1,4-beta-mannosidase
BaRT2v18chr1HG000770	Mannan endo-1,4-beta-mannosidase
BaRT2v18chr1HG000780	Powdery mildew resistance protein PM3 variant;Putative disease resistance protein RGA4
BaRT2v18chr1HG000790	Putative disease resistance protein RGA4
BaRT2v18chr1HG000800
BaRT2v18chr1HG000810	Powdery mildew resistance protein PM3 variant
BaRT2v18chr1HG000820
BaRT2v18chr1HG000830
BaRT2v18chr1HG000830
BaRT2v18chr1HG000830
BaRT2v18chr1HG000830
BaRT2v18chr1HG000830
BaRT2v18chr1HG000830
BaRT2v18chr1HG000830
BaRT2v18chr1HG000830
BaRT2v18chr1HG000840
BaRT2v18chr1HG000850
BaRT2v18chr1HG000860
BaRT2v18chr1HG000860	Chorion class high-cysteine HCB protein 13
BaRT2v18chr1HG000860
BaRT2v18chr1HG000870	B hordein;Low-molecular-weight glutenin subunit
BaRT2v18chr1HG000870	B hordein;Low-molecular-weight glutenin subunit
BaRT2v18chr1HG000870	B hordein;Low-molecular-weight glutenin subunit
BaRT2v18chr1HG000880
BaRT2v18chr1HG000880
BaRT2v18chr1HG000880
BaRT2v18chr1HG000880
BaRT2v18chr1HG000880
BaRT2v18chr1HG000890	MICOS complex subunit mic25a like;HMG box-containing protein 4;Coiled-coil-helix-coiled-coil-helix domain-containing protein 3;Copper ion binding;F-box only protein 11
BaRT2v18chr1HG000890	MICOS complex subunit mic25a like;HMG box-containing protein 4;Coiled-coil-helix-coiled-coil-helix domain-containing protein 3;Copper ion binding;F-box only protein 11
BaRT2v18chr1HG000890	MICOS complex subunit mic25a like;HMG box-containing protein 4;Coiled-coil-helix-coiled-coil-helix domain-containing protein 3;Copper ion binding;F-box only protein 11
BaRT2v18chr1HG000890	MICOS complex subunit mic25a like;HMG box-containing protein 4;Coiled-coil-helix-coiled-coil-helix domain-containing protein 3;Copper ion binding;F-box only protein 11
BaRT2v18chr1HG000890	MICOS complex subunit mic25a like;HMG box-containing protein 4;Coiled-coil-helix-coiled-coil-helix domain-containing protein 3;Copper ion binding;F-box only protein 11
BaRT2v18chr1HG000900	Putative E3 ubiquitin-protein ligase XBOS33;Tetratricopeptide TPR-1;Ankyrin-1;Ankyrin-1 isoform X1;Ankyrin repeat family protein;Ankyrin-1 like
BaRT2v18chr1HG000900	Putative E3 ubiquitin-protein ligase XBOS33;Tetratricopeptide TPR-1;Ankyrin-1;Ankyrin-1 isoform X1;Ankyrin repeat family protein;Ankyrin-1 like
BaRT2v18chr1HG000900	Putative E3 ubiquitin-protein ligase XBOS33;Ankyrin-1;Tetratricopeptide TPR-1;Ankyrin-1 isoform X1;Ankyrin-1 like;Ankyrin repeat family protein
BaRT2v18chr1HG000900	Tetratricopeptide TPR-1;Ankyrin-1;Ankyrin-1 isoform X1;Ankyrin-1 like
BaRT2v18chr1HG000900	Putative E3 ubiquitin-protein ligase XBOS33;Ankyrin-1;Tetratricopeptide TPR-1;N-terminal acetyltransferase A, auxiliary subunit;Ankyrin-1 isoform X1;Ankyrin repeat-containing protein, putative;Ankyrin-1 like
BaRT2v18chr1HG000900	Putative E3 ubiquitin-protein ligase XBOS33;Tetratricopeptide TPR-1;N-terminal acetyltransferase A, auxiliary subunit;Ankyrin-1;Ankyrin-1 isoform X1;Ankyrin-1 like
BaRT2v18chr1HG000900
BaRT2v18chr1HG000900
BaRT2v18chr1HG000900
BaRT2v18chr1HG000900
BaRT2v18chr1HG000910
BaRT2v18chr1HG000910	Putative 4-methyl-5(B-hydroxyethyl)-thiazol monophosphate biosynthesis enzyme;Class I glutamine amidotransferase-like superfamily protein isoform 1;Chaperone YajL
BaRT2v18chr1HG000910
BaRT2v18chr1HG000910
BaRT2v18chr1HG000920
BaRT2v18chr1HG000930
BaRT2v18chr1HG000940	Low molecular weight glutenin subunit;Barley mRNA for B1-hordein (Fragment);B-hordein
BaRT2v18chr1HG000950	B hordein;Low molecular weight glutenin subunit (Fragment);AAI domain-containing protein
BaRT2v18chr1HG000960
BaRT2v18chr1HG000970	Low-molecular-weight glutenin subunit;Barley mRNA for B1-hordein (Fragment);B-hordein
BaRT2v18chr1HG000980
BaRT2v18chr1HG000990
BaRT2v18chr1HG000990
BaRT2v18chr1HG001000
BaRT2v18chr1HG001010
BaRT2v18chr1HG001010
BaRT2v18chr1HG001020
BaRT2v18chr1HG001030
BaRT2v18chr1HG001040
BaRT2v18chr1HG001050
BaRT2v18chr1HG001060
BaRT2v18chr1HG001060
BaRT2v18chr1HG001070
BaRT2v18chr1HG001080
BaRT2v18chr1HG001090
BaRT2v18chr1HG001100
BaRT2v18chr1HG001100
BaRT2v18chr1HG001100
BaRT2v18chr1HG001110
BaRT2v18chr1HG001110
BaRT2v18chr1HG001120
BaRT2v18chr1HG001130
BaRT2v18chr1HG001140	Polygalacturonase inhibitor;Polygalacturonase-inhibitor protein 1
BaRT2v18chr1HG001150
BaRT2v18chr1HG001160
BaRT2v18chr1HG001160	Vacuolar sorting protein 39;CNH domain-containing protein;Clathrin;Transforming growth factor-beta receptor-associated protein 1
BaRT2v18chr1HG001160
BaRT2v18chr1HG001160	Vacuolar sorting protein 39;CNH domain-containing protein;Clathrin;Transforming growth factor-beta receptor-associated protein 1
BaRT2v18chr1HG001160	Vacuolar sorting protein 39;CNH domain-containing protein;Clathrin;Transforming growth factor-beta receptor-associated protein 1
BaRT2v18chr1HG001160	Vacuolar sorting protein 39;CNH domain-containing protein;Transforming growth factor-beta receptor-associated protein 1;Clathrin
BaRT2v18chr1HG001160	Vacuolar sorting protein 39;CNH domain-containing protein;Transforming growth factor-beta receptor-associated protein 1;Clathrin
BaRT2v18chr1HG001160
BaRT2v18chr1HG001160	Vacuolar sorting protein 39;CNH domain-containing protein;Transforming growth factor-beta receptor-associated protein 1;Clathrin
BaRT2v18chr1HG001160
BaRT2v18chr1HG001170
BaRT2v18chr1HG001170
BaRT2v18chr1HG001180	60S ribosomal protein L2, mitochondrial;Ribosomal protein L2
BaRT2v18chr1HG001180-BaRT2v18chr1HG001190	60S ribosomal protein L2, mitochondrial
BaRT2v18chr1HG001190
BaRT2v18chr1HG001190
BaRT2v18chr1HG001200
BaRT2v18chr1HG001200
BaRT2v18chr1HG001200	Serine/threonine-protein kinase 19
BaRT2v18chr1HG001200
BaRT2v18chr1HG001200
BaRT2v18chr1HG001200
BaRT2v18chr1HG001200	Serine/threonine-protein kinase 19
BaRT2v18chr1HG001200
BaRT2v18chr1HG001200
BaRT2v18chr1HG001200	Serine/threonine-protein kinase 19
BaRT2v18chr1HG001210
BaRT2v18chr1HG001220	Disease resistance protein RPM1
BaRT2v18chr1HG001230
BaRT2v18chr1HG001240
BaRT2v18chr1HG001250	GDSL esterase/lipase
BaRT2v18chr1HG001260
BaRT2v18chr1HG001260
BaRT2v18chr1HG001260
BaRT2v18chr1HG001260	E3 ubiquitin-protein ligase CHIP;Carboxyl terminus of HSC70-interacting protein;STIP1 homology and U box-containing protein 1;Heat shock protein 70 (HSP70)-interacting protein, putative;U-box domain-containing protein
BaRT2v18chr1HG001260
BaRT2v18chr1HG001260
BaRT2v18chr1HG001260
BaRT2v18chr1HG001270
BaRT2v18chr1HG001280
BaRT2v18chr1HG001280
BaRT2v18chr1HG001290	Glutathione transferase
BaRT2v18chr1HG001300	Methionine S-methyltransferase
BaRT2v18chr1HG001300	Methionine S-methyltransferase
BaRT2v18chr1HG001310
BaRT2v18chr1HG001320
BaRT2v18chr1HG001330	Fusarium resistance protein I2C-5-like;Disease resistance protein RGA2;NB-ARC domain-containing protein
BaRT2v18chr1HG001330	Fusarium resistance protein I2C-5-like;Disease resistance protein RGA2;NB-ARC domain-containing protein
BaRT2v18chr1HG001340
BaRT2v18chr1HG001350
BaRT2v18chr1HG001350
BaRT2v18chr1HG001350
BaRT2v18chr1HG001360	Arginine decarboxylase
BaRT2v18chr1HG001360	Arginine decarboxylase
BaRT2v18chr1HG001360	Arginine decarboxylase
BaRT2v18chr1HG001360	Arginine decarboxylase
BaRT2v18chr1HG001370
BaRT2v18chr1HG001380
BaRT2v18chr1HG001380
BaRT2v18chr1HG001390
BaRT2v18chr1HG001400
BaRT2v18chr1HG001400	12-oxophytodienoate reductase 1
BaRT2v18chr1HG001410
BaRT2v18chr1HG001420
BaRT2v18chr1HG001420	protein EMBRYO SAC DEVELOPMENT ARREST 3, chloroplastic;protein PHOTOSYSTEM I ASSEMBLY 2, chloroplastic;Heat shock protein DnaJ, cysteine-rich domain containing protein;glutaredoxin domain-containing cysteine-rich protein CG12206-like
BaRT2v18chr1HG001420
BaRT2v18chr1HG001420-BaRT2v18chr1HG001430	CAP Gly-rich domain containing protein;CAP-Gly domain-containing protein
BaRT2v18chr1HG001420-BaRT2v18chr1HG001430	Tubulin-folding cofactor E;CAP-Gly domain-containing protein
BaRT2v18chr1HG001420-BaRT2v18chr1HG001430	Tubulin-folding cofactor E;CAP-Gly domain-containing protein
BaRT2v18chr1HG001420-BaRT2v18chr1HG001430	Tubulin-folding cofactor E;CAP-Gly domain-containing protein
BaRT2v18chr1HG001430
BaRT2v18chr1HG001430	Tubulin-folding cofactor E;CAP-Gly domain-containing protein
BaRT2v18chr1HG001430	Tubulin-folding cofactor E;CAP-Gly domain-containing protein
BaRT2v18chr1HG001430
BaRT2v18chr1HG001430
BaRT2v18chr1HG001430	Tubulin-folding cofactor E;CAP-Gly domain-containing protein;Putative CAP Gly-rich domain, leucine-rich repeat domain, L domain-containing protein
BaRT2v18chr1HG001430
BaRT2v18chr1HG001430	Tubulin-folding cofactor E;CAP-Gly domain-containing protein;Putative CAP Gly-rich domain, leucine-rich repeat domain, L domain-containing protein
BaRT2v18chr1HG001430
BaRT2v18chr1HG001430
BaRT2v18chr1HG001430
BaRT2v18chr1HG001440
BaRT2v18chr1HG001440
BaRT2v18chr1HG001450
BaRT2v18chr1HG001460	12-oxophytodienoate reductase 1
BaRT2v18chr1HG001470	12-oxophytodienoate reductase 1
BaRT2v18chr1HG001480
BaRT2v18chr1HG001480	Phosphatidate cytidylyltransferase
BaRT2v18chr1HG001480	Phosphatidate cytidylyltransferase
BaRT2v18chr1HG001480	Phosphatidate cytidylyltransferase
BaRT2v18chr1HG001480
BaRT2v18chr1HG001480
BaRT2v18chr1HG001480	Phosphatidate cytidylyltransferase
BaRT2v18chr1HG001480	Phosphatidate cytidylyltransferase
BaRT2v18chr1HG001480	Phosphatidate cytidylyltransferase
BaRT2v18chr1HG001490	Serine/arginine-rich splicing factor SR45;RRM domain-containing protein;Ribonucleic acid binding protein S1, putative
BaRT2v18chr1HG001490
BaRT2v18chr1HG001490
BaRT2v18chr1HG001490	Serine/arginine-rich splicing factor SR45;RRM domain-containing protein;Ribonucleic acid binding protein S1, putative
BaRT2v18chr1HG001490	Serine/arginine-rich splicing factor SR45;RRM domain-containing protein;Ribonucleic acid binding protein S1, putative
BaRT2v18chr1HG001490	Serine/arginine-rich splicing factor SR45;RRM domain-containing protein;Ribonucleic acid binding protein S1, putative
BaRT2v18chr1HG001490	Serine/arginine-rich splicing factor SR45;RRM domain-containing protein;Ribonucleic acid binding protein S1, putative
BaRT2v18chr1HG001490
BaRT2v18chr1HG001490
BaRT2v18chr1HG001500
BaRT2v18chr1HG001510	FT-interacting protein 1;C2 calcium/lipid-binding plant phosphoribosyltransferase family protein;FT-interacting protein 1-like
BaRT2v18chr1HG001520
BaRT2v18chr1HG001530	Receptor-like serine/threonine-protein kinase
BaRT2v18chr1HG001540	Glutathione-S-transferase 2
BaRT2v18chr1HG001540	Glutathione-S-transferase 2
BaRT2v18chr1HG001540	Glutathione-S-transferase 2
BaRT2v18chr1HG001540	Glutathione-S-transferase 2
BaRT2v18chr1HG001540	Glutathione-S-transferase 2
BaRT2v18chr1HG001540
BaRT2v18chr1HG001540
BaRT2v18chr1HG001540	Glutathione-S-transferase 2
BaRT2v18chr1HG001540
BaRT2v18chr1HG001550
BaRT2v18chr1HG001560	O-methyltransferase ZRP4;Acetylserotonin O-methyltransferase 3
BaRT2v18chr1HG001560	O-methyltransferase ZRP4;Acetylserotonin O-methyltransferase 3
BaRT2v18chr1HG001570
BaRT2v18chr1HG001580
BaRT2v18chr1HG001590
BaRT2v18chr1HG001600	Disease resistance protein RPM1
BaRT2v18chr1HG001610	Protein kinase domain-containing protein
BaRT2v18chr1HG001610	Protein kinase domain-containing protein
BaRT2v18chr1HG001610	Protein kinase domain-containing protein
BaRT2v18chr1HG001610	Protein kinase domain-containing protein
BaRT2v18chr1HG001610	Protein kinase domain-containing protein
BaRT2v18chr1HG001620
BaRT2v18chr1HG001620	Protein kinase domain-containing protein;Rust resistance kinase Lr10
BaRT2v18chr1HG001630
BaRT2v18chr1HG001630
BaRT2v18chr1HG001630
BaRT2v18chr1HG001630
BaRT2v18chr1HG001630
BaRT2v18chr1HG001640
BaRT2v18chr1HG001650	V-type proton ATPase proteolipid subunit
BaRT2v18chr1HG001650	V-type proton ATPase proteolipid subunit
BaRT2v18chr1HG001650
BaRT2v18chr1HG001650
BaRT2v18chr1HG001650
BaRT2v18chr1HG001660	Nuclear inhibitor of protein phosphatase 1;FHA domain-containing protein
BaRT2v18chr1HG001660	Nuclear inhibitor of protein phosphatase 1;FHA domain-containing protein
BaRT2v18chr1HG001660	Nuclear inhibitor of protein phosphatase 1;FHA domain-containing protein
BaRT2v18chr1HG001660	Nuclear inhibitor of protein phosphatase 1;FHA domain-containing protein
BaRT2v18chr1HG001670
BaRT2v18chr1HG001680	Protein kinase domain-containing protein
BaRT2v18chr1HG001680	Protein kinase domain-containing protein
BaRT2v18chr1HG001680	Protein kinase domain-containing protein
BaRT2v18chr1HG001680	Protein kinase domain-containing protein
BaRT2v18chr1HG001680	Protein kinase domain-containing protein
BaRT2v18chr1HG001680	Protein kinase domain-containing protein
BaRT2v18chr1HG001680	Protein kinase domain-containing protein
BaRT2v18chr1HG001680	Protein kinase domain-containing protein
BaRT2v18chr1HG001680	Protein kinase domain-containing protein
BaRT2v18chr1HG001680	Protein kinase domain-containing protein
BaRT2v18chr1HG001680	Protein kinase domain-containing protein
BaRT2v18chr1HG001680	Protein kinase domain-containing protein
BaRT2v18chr1HG001680	Protein kinase domain-containing protein
BaRT2v18chr1HG001690	Protein kinase domain-containing protein;Rust resistance kinase Lr10
BaRT2v18chr1HG001700	Disease resistance protein RPM1
BaRT2v18chr1HG001700	Disease resistance protein RPM1
BaRT2v18chr1HG001700	Disease resistance protein RPM1
BaRT2v18chr1HG001710	UDPGT domain-containing protein;UDP-glycosyltransferase 91B1;Glycosyltransferase;Anthocyanidin 3-O-glucosyltransferase;UDP-glycosyltransferase 91C1
BaRT2v18chr1HG001720	Disease resistance protein RPM1, putative
BaRT2v18chr1HG001730
BaRT2v18chr1HG001730	NB-ARC domain-containing protein;Disease resistance protein RGA2
BaRT2v18chr1HG001740
BaRT2v18chr1HG001750
BaRT2v18chr1HG001750
BaRT2v18chr1HG001750
BaRT2v18chr1HG001750
BaRT2v18chr1HG001750
BaRT2v18chr1HG001760
BaRT2v18chr1HG001760
BaRT2v18chr1HG001760
BaRT2v18chr1HG001760
BaRT2v18chr1HG001770	Leaf rust resistance protein Lr10;Resistance protein RGA2
BaRT2v18chr1HG001770	Leaf rust resistance protein Lr10;Resistance protein RGA2
BaRT2v18chr1HG001770	Leaf rust resistance protein Lr10;Resistance protein RGA2
BaRT2v18chr1HG001770	Leaf rust resistance protein Lr10;Resistance protein RGA2
BaRT2v18chr1HG001780
BaRT2v18chr1HG001780	Brown planthopper resistance protein BPH1/9;Resistance protein RGA2;Disease resistance protein RPM1
BaRT2v18chr1HG001780	Brown planthopper resistance protein BPH1/9;Resistance protein RGA2;Disease resistance protein RPM1
BaRT2v18chr1HG001780	Brown planthopper resistance protein BPH1/9;Resistance protein RGA2;Disease resistance protein RPM1
BaRT2v18chr1HG001790
BaRT2v18chr1HG001790	E3 ubiquitin-protein ligase HERC2;Regulator of chromosome condensation (RCC1) family with FYVE zinc finger domain;FYVE-type domain-containing protein
BaRT2v18chr1HG001790	E3 ubiquitin-protein ligase HERC2;Regulator of chromosome condensation (RCC1) family with FYVE zinc finger domain;FYVE-type domain-containing protein
BaRT2v18chr1HG001800	Actin;Actin-7
BaRT2v18chr1HG001800	Beta-actin;Actin
BaRT2v18chr1HG001800
BaRT2v18chr1HG001800	Beta-actin;Actin
BaRT2v18chr1HG001800	Beta-actin;Actin
BaRT2v18chr1HG001800	Beta-actin;Actin
BaRT2v18chr1HG001800	Beta-actin;Actin
BaRT2v18chr1HG001800	Actin-7 like (Fragment);Actin-1
BaRT2v18chr1HG001800
BaRT2v18chr1HG001800
BaRT2v18chr1HG001800	Beta-actin;Actin
BaRT2v18chr1HG001800	Beta-actin;Actin
BaRT2v18chr1HG001800	Beta-actin;Actin;Actin-11 isoform 1
BaRT2v18chr1HG001800	Beta-actin;Actin
BaRT2v18chr1HG001800	Beta-actin;Actin
BaRT2v18chr1HG001800
BaRT2v18chr1HG001800
BaRT2v18chr1HG001800
BaRT2v18chr1HG001810
BaRT2v18chr1HG001810	J domain-containing protein
BaRT2v18chr1HG001810
BaRT2v18chr1HG001810
BaRT2v18chr1HG001810	J domain-containing protein
BaRT2v18chr1HG001810	J domain-containing protein
BaRT2v18chr1HG001810
BaRT2v18chr1HG001820	Phosphoinositide phosphatase SAC6;SAC domain-containing protein
BaRT2v18chr1HG001820	Phosphoinositide phosphatase SAC6;SAC domain-containing protein
BaRT2v18chr1HG001830
BaRT2v18chr1HG001840	Phenolic glucoside malonyltransferase 2;Putative quercetin 3-O-glucoside-6''-O-malonyltransferase;Anthocyanin 5-aromatic acyltransferase
BaRT2v18chr1HG001840	Phenolic glucoside malonyltransferase 2;Putative quercetin 3-O-glucoside-6''-O-malonyltransferase;Anthocyanin 5-aromatic acyltransferase
BaRT2v18chr1HG001850	NB-ARC domain-containing protein;Disease resistance protein RPM1
BaRT2v18chr1HG001850	Disease resistance protein RPM1
BaRT2v18chr1HG001850	Disease resistance protein RPM1
BaRT2v18chr1HG001850	Pib variant protein (Fragment);Disease resistance protein RPM1;NB-ARC domain-containing protein
BaRT2v18chr1HG001860	Brown planthopper resistance protein BPH1/9;Disease resistance protein RPP13
BaRT2v18chr1HG001860	Brown planthopper resistance protein BPH1/9;Disease resistance protein RPP13
BaRT2v18chr1HG001870
BaRT2v18chr1HG001880
BaRT2v18chr1HG001890
BaRT2v18chr1HG001900
BaRT2v18chr1HG001900
BaRT2v18chr1HG001900
BaRT2v18chr1HG001900
BaRT2v18chr1HG001900
BaRT2v18chr1HG001900
BaRT2v18chr1HG001910	Late embryogenesis abundant protein-related / LEA protein-related
BaRT2v18chr1HG001920	Pentatricopeptide repeat-containing protein
BaRT2v18chr1HG001920	Pentatricopeptide repeat-containing protein
BaRT2v18chr1HG001930	Putative disease resistance protein
BaRT2v18chr1HG001930	Putative disease resistance protein
BaRT2v18chr1HG001940
BaRT2v18chr1HG001940	Rab-GAP TBC domain-containing protein;Tubulin-folding cofactor A-like;TBC1 domain family member 2A;RabGAP/TBC domain-containing family protein;Rab-GTPase-TBC domain;Small G protein signaling modulator 3
BaRT2v18chr1HG001950
BaRT2v18chr1HG001960
BaRT2v18chr1HG001970	Beta-galactosidase 10;SUEL-type lectin domain-containing protein
BaRT2v18chr1HG001980	Beta-galactosidase 13;Beta-galactosidase
BaRT2v18chr1HG001980
BaRT2v18chr1HG001990
BaRT2v18chr1HG001990
BaRT2v18chr1HG001990
BaRT2v18chr1HG002000	probable peptide/nitrate transporter At3g43790;Major facilitator superfamily antiporter, putative, expressed;protein ZINC INDUCED FACILITATOR-LIKE 1-like;MFS domain-containing protein;Transporter of mugineic acid3
BaRT2v18chr1HG002000	Carbohydrate transporter/ sugar porter/ transporter;Major facilitator;Protein ZINC INDUCED FACILITATOR-LIKE 1
BaRT2v18chr1HG002000
BaRT2v18chr1HG002000	Major facilitator superfamily antiporter, putative;Protein ZINC INDUCED FACILITATOR-LIKE 1;MFS domain-containing protein
BaRT2v18chr1HG002010
BaRT2v18chr1HG002020
BaRT2v18chr1HG002030	ABC transporter D family member 1
BaRT2v18chr1HG002030	ABC transporter D family member 1
BaRT2v18chr1HG002030
BaRT2v18chr1HG002030	ABC transporter D family member 1
BaRT2v18chr1HG002030	ATP-binding cassette containing protein;ABC transmembrane type-1 domain-containing protein
BaRT2v18chr1HG002030	ATP-binding cassette containing protein;ABC transmembrane type-1 domain-containing protein
BaRT2v18chr1HG002040
BaRT2v18chr1HG002040
BaRT2v18chr1HG002040
BaRT2v18chr1HG002040
BaRT2v18chr1HG002040
BaRT2v18chr1HG002040
BaRT2v18chr1HG002050
BaRT2v18chr1HG002050
BaRT2v18chr1HG002050
BaRT2v18chr1HG002050
BaRT2v18chr1HG002050
BaRT2v18chr1HG002050
BaRT2v18chr1HG002050
BaRT2v18chr1HG002050
BaRT2v18chr1HG002060
BaRT2v18chr1HG002060
BaRT2v18chr1HG002070	Tyrosine/DOPA decarboxylase 2
BaRT2v18chr1HG002080
BaRT2v18chr1HG002090
BaRT2v18chr1HG002100
BaRT2v18chr1HG002110
BaRT2v18chr1HG002110
BaRT2v18chr1HG002110	Caffeic acid 3-O-methyltransferase;Tricetin 3',4',5'-O-trimethyltransferase;Flavone 3'-O-methyltransferase 1;O-methyltransferase 5;Flavonoid O-methyltransferase
BaRT2v18chr1HG002120
BaRT2v18chr1HG002130	Protein DETOXIFICATION;MATE efflux family protein ALF5
BaRT2v18chr1HG002140
BaRT2v18chr1HG002140	Transcription initiation factor IIA subunit 2
BaRT2v18chr1HG002150
BaRT2v18chr1HG002150	Drought-induced 19;Protein DEHYDRATION-INDUCED 5;zf-Di19 domain-containing protein
BaRT2v18chr1HG002160	tRNA pseudouridine synthase B;H/ACA ribonucleoprotein complex subunit 4
BaRT2v18chr1HG002160
BaRT2v18chr1HG002160	H/ACA ribonucleoprotein complex subunit 4;tRNA pseudouridine synthase B
BaRT2v18chr1HG002160
BaRT2v18chr1HG002170	50S ribosomal protein L22, chloroplastic
BaRT2v18chr1HG002170
BaRT2v18chr1HG002170	50S ribosomal protein L22, chloroplastic
BaRT2v18chr1HG002170
BaRT2v18chr1HG002170
BaRT2v18chr1HG002170	50S ribosomal protein L22, chloroplastic
BaRT2v18chr1HG002170	50S ribosomal protein L22, chloroplastic
BaRT2v18chr1HG002180	Lysine ketoglutarate reductase trans-splicing related 1
BaRT2v18chr1HG002180	Lysine ketoglutarate reductase trans-splicing related 1
BaRT2v18chr1HG002180	Lysine ketoglutarate reductase trans-splicing related 1
BaRT2v18chr1HG002180	Lysine ketoglutarate reductase trans-splicing related 1
BaRT2v18chr1HG002180	Lysine ketoglutarate reductase trans-splicing related 1
BaRT2v18chr1HG002180
BaRT2v18chr1HG002190
BaRT2v18chr1HG002200
BaRT2v18chr1HG002200	Non-specific serine/threonine protein kinase
BaRT2v18chr1HG002200
BaRT2v18chr1HG002200	Non-specific serine/threonine protein kinase
BaRT2v18chr1HG002200
BaRT2v18chr1HG002210
BaRT2v18chr1HG002210
BaRT2v18chr1HG002220
BaRT2v18chr1HG002220
BaRT2v18chr1HG002220
BaRT2v18chr1HG002230	Vignain
BaRT2v18chr1HG002230	Cysteine protease XCP1;Xylem cysteine proteinase 1;Cysteine proteinase CP1
BaRT2v18chr1HG002230	Cysteine protease XCP1;Xylem cysteine proteinase 1;Cysteine proteinase CP1
BaRT2v18chr1HG002240	Tr-type G domain-containing protein;Elongation factor 2
BaRT2v18chr1HG002240	Tr-type G domain-containing protein;Elongation factor 2
BaRT2v18chr1HG002240	Tr-type G domain-containing protein;Elongation factor 2
BaRT2v18chr1HG002240	Tr-type G domain-containing protein;Elongation factor 2
BaRT2v18chr1HG002250
BaRT2v18chr1HG002260
BaRT2v18chr1HG002270
BaRT2v18chr1HG002280
BaRT2v18chr1HG002290
BaRT2v18chr1HG002290
BaRT2v18chr1HG002300
BaRT2v18chr1HG002310
BaRT2v18chr1HG002320
BaRT2v18chr1HG002330
BaRT2v18chr1HG002340	Disease resistance protein RPP13
BaRT2v18chr1HG002340	Disease resistance protein RPP13
BaRT2v18chr1HG002340	Disease resistance protein RPP13
BaRT2v18chr1HG002350	Disease resistance protein RPP13
BaRT2v18chr1HG002350	Disease resistance protein RPP13
BaRT2v18chr1HG002350	Disease resistance protein RPP13
BaRT2v18chr1HG002360	Disease resistance protein RPP13
BaRT2v18chr1HG002360	Disease resistance protein RPP13
BaRT2v18chr1HG002360
BaRT2v18chr1HG002360	Disease resistance protein RPP13
BaRT2v18chr1HG002360	Disease resistance protein RPP13
BaRT2v18chr1HG002360	Disease resistance protein RPP13
BaRT2v18chr1HG002360	Disease resistance protein RPP13
BaRT2v18chr1HG002370	PUM-HD domain-containing protein;Pumilio homolog 3;Pumilio-like protein 3
BaRT2v18chr1HG002380
BaRT2v18chr1HG002390
BaRT2v18chr1HG002400
BaRT2v18chr1HG002400
BaRT2v18chr1HG002400	Calcium permeable stress-gated cation channel 1
BaRT2v18chr1HG002400	Calcium permeable stress-gated cation channel 1
BaRT2v18chr1HG002400
BaRT2v18chr1HG002400	Calcium permeable stress-gated cation channel 1
BaRT2v18chr1HG002400	Calcium permeable stress-gated cation channel 1
BaRT2v18chr1HG002410
BaRT2v18chr1HG002410
BaRT2v18chr1HG002420	Putative 3-beta hydroxysteroid dehydrogenase/isomerase protein;NAD(P)-binding Rossmann-fold superfamily protein isoform 1
BaRT2v18chr1HG002420
BaRT2v18chr1HG002420
BaRT2v18chr1HG002420	Putative 3-beta hydroxysteroid dehydrogenase/isomerase protein;NAD(P)-binding Rossmann-fold superfamily protein isoform 1
BaRT2v18chr1HG002420
BaRT2v18chr1HG002420
BaRT2v18chr1HG002420	Putative 3-beta hydroxysteroid dehydrogenase/isomerase protein;NAD(P)-binding Rossmann-fold superfamily protein isoform 1
BaRT2v18chr1HG002420	Putative 3-beta hydroxysteroid dehydrogenase/isomerase protein;NAD(P)-binding Rossmann-fold superfamily protein isoform 1
BaRT2v18chr1HG002420	Putative 3-beta hydroxysteroid dehydrogenase/isomerase protein;NAD(P)-binding Rossmann-fold superfamily protein isoform 1
BaRT2v18chr1HG002430
BaRT2v18chr1HG002440
BaRT2v18chr1HG002450
BaRT2v18chr1HG002450
BaRT2v18chr1HG002450	Heat shock protein DnaJ, cysteine-rich domain-containing protein;Putative Transmembrane amino acid transporter family protein;Chaperone DnaJ
BaRT2v18chr1HG002460	RING-type E3 ubiquitin transferase
BaRT2v18chr1HG002470
BaRT2v18chr1HG002480
BaRT2v18chr1HG002480	DEAD-box ATP-dependent RNA helicase 17;p-loop containing nucleoside triphosphate hydrolases superfamily protein isoform 1
BaRT2v18chr1HG002480	DEAD-box ATP-dependent RNA helicase 17
BaRT2v18chr1HG002480
BaRT2v18chr1HG002490	RAB5-interacting protein isoform a;respirasome Complex Assembly Factor 1;Rab5ip domain-containing protein;Putative rab5-interacting protein family;Rab5-interacting;Oxysterol binding protein-related protein 3C
BaRT2v18chr1HG002490	RAB5-interacting protein isoform a;respirasome Complex Assembly Factor 1;Rab5-interacting protein family;Rab5ip domain-containing protein;Rab5-interacting;Oxysterol binding protein-related protein 3C
BaRT2v18chr1HG002490	RAB5-interacting protein isoform a;respirasome Complex Assembly Factor 1;Rab5-interacting;Rab5ip domain-containing protein;Putative rab5-interacting protein family
BaRT2v18chr1HG002490
BaRT2v18chr1HG002500
BaRT2v18chr1HG002500
BaRT2v18chr1HG002500
BaRT2v18chr1HG002500
BaRT2v18chr1HG002500
BaRT2v18chr1HG002500
BaRT2v18chr1HG002500
BaRT2v18chr1HG002500
BaRT2v18chr1HG002500
BaRT2v18chr1HG002500
BaRT2v18chr1HG002500
BaRT2v18chr1HG002500
BaRT2v18chr1HG002500
BaRT2v18chr1HG002510
BaRT2v18chr1HG002510
BaRT2v18chr1HG002510
BaRT2v18chr1HG002510
BaRT2v18chr1HG002510
BaRT2v18chr1HG002520
BaRT2v18chr1HG002520	PGR5-like protein 1A, chloroplastic
BaRT2v18chr1HG002520
BaRT2v18chr1HG002520
BaRT2v18chr1HG002520	PGR5-like protein 1A, chloroplastic
BaRT2v18chr1HG002520
BaRT2v18chr1HG002520
BaRT2v18chr1HG002520
BaRT2v18chr1HG002520
BaRT2v18chr1HG002520
BaRT2v18chr1HG002520
BaRT2v18chr1HG002520	PGR5-like protein 1A, chloroplastic
BaRT2v18chr1HG002520
BaRT2v18chr1HG002530
BaRT2v18chr1HG002540
BaRT2v18chr1HG002550
BaRT2v18chr1HG002550	Cyseine protease;Xylem cysteine proteinase 1;Caricain;Cysteine protease;Senescence-associated gene 12;Fruit bromelain;Ananain
BaRT2v18chr1HG002560	Jacalin-type lectin domain-containing protein
BaRT2v18chr1HG002570	Purple acid phosphatase
BaRT2v18chr1HG002570	Purple acid phosphatase
BaRT2v18chr1HG002570	Purple acid phosphatase
BaRT2v18chr1HG002570	Purple acid phosphatase
BaRT2v18chr1HG002570	Purple acid phosphatase
BaRT2v18chr1HG002570	Purple acid phosphatase
BaRT2v18chr1HG002570	Purple acid phosphatase
BaRT2v18chr1HG002570	Purple acid phosphatase
BaRT2v18chr1HG002570	Purple acid phosphatase
BaRT2v18chr1HG002580	receptor-like cytoplasmic kinase 176;probable serine/threonine-protein kinase PBL9;Protein kinase domain-containing protein;Protein kinase APK1A chloroplastic;probable serine/threonine-protein kinase PBL10
BaRT2v18chr1HG002580
BaRT2v18chr1HG002580
BaRT2v18chr1HG002580
BaRT2v18chr1HG002580	receptor-like cytoplasmic kinase 176;probable serine/threonine-protein kinase PBL9;Protein kinase domain-containing protein;Protein kinase APK1A chloroplastic;probable serine/threonine-protein kinase PBL10
BaRT2v18chr1HG002580
BaRT2v18chr1HG002590
BaRT2v18chr1HG002600	Cyseine protease;Xylem cysteine proteinase 1;Caricain;Cysteine protease;Senescence-associated gene 12;Fruit bromelain;Ananain
BaRT2v18chr1HG002600
BaRT2v18chr1HG002600
BaRT2v18chr1HG002600
BaRT2v18chr1HG002610
BaRT2v18chr1HG002620	H+/oligopeptide symporter;Nitrate transporter;Major facilitator superfamily domain, general substrate transporter
BaRT2v18chr1HG002620	Nitrate/chlorate transporter;Major facilitator superfamily protein isoform 2;Proton-dependent oligopeptide transporter family;Putative dicarboxylate transporter;Solute carrier family 15 (Peptide/histidine transporter), member 3/4
BaRT2v18chr1HG002620
BaRT2v18chr1HG002630
BaRT2v18chr1HG002640
BaRT2v18chr1HG002650
BaRT2v18chr1HG002660	Putative light repressible receptor protein kinase;Protein kinase domain-containing protein
BaRT2v18chr1HG002670	Fe2OG dioxygenase domain-containing protein;2-oxoglutarate (2OG) and Fe(II)-dependent oxygenase superfamily protein
BaRT2v18chr1HG002680	Replication protein A subunit
BaRT2v18chr1HG002690	mRNA export factor;Transducin/WD40 repeat-like superfamily protein isoform 1;Coatomer beta subunit
BaRT2v18chr1HG002690	mRNA export factor;Transducin/WD40 repeat-like superfamily protein isoform 1;Coatomer beta subunit
BaRT2v18chr1HG002690	mRNA export factor;Coatomer beta subunit;Transducin/WD40 repeat-like superfamily protein isoform 1
BaRT2v18chr1HG002690
BaRT2v18chr1HG002690
BaRT2v18chr1HG002690	mRNA export factor;Transducin/WD40 repeat-like superfamily protein isoform 1;Coatomer beta subunit
BaRT2v18chr1HG002690
BaRT2v18chr1HG002690
BaRT2v18chr1HG002690
BaRT2v18chr1HG002690	mRNA export factor;G-protein beta WD-40 repeat-containing protein
BaRT2v18chr1HG002700	Putative F-box/LRR-repeat protein 23;F-box protein SKIP19;Ubiquitin-protein ligase;F-box domain-containing protein
BaRT2v18chr1HG002700
BaRT2v18chr1HG002700	Putative F-box/LRR-repeat protein 23;F-box protein SKIP19;Ubiquitin-protein ligase;F-box domain-containing protein
BaRT2v18chr1HG002710
BaRT2v18chr1HG002720	beta-1,2-xylosyltransferase XYXT1;beta-1,2-xylosyltransferase XYXT1-like;Glycosyltransferase AER61;Protein O-linked-mannose beta-1,4-N-acetylglucosaminyltransferase 2 (Fragment);Putative glycosyltransferase AGO61;1,4-beta-D-xylan synthase;EGF domain-specific O-linked N-acetylglucosamine transferase
BaRT2v18chr1HG002730
BaRT2v18chr1HG002740
BaRT2v18chr1HG002750
BaRT2v18chr1HG002750
BaRT2v18chr1HG002760
BaRT2v18chr1HG002770
BaRT2v18chr1HG002780
BaRT2v18chr1HG002790
BaRT2v18chr1HG002800
BaRT2v18chr1HG002810
BaRT2v18chr1HG002820
BaRT2v18chr1HG002830
BaRT2v18chr1HG002830
BaRT2v18chr1HG002830
BaRT2v18chr1HG002840	Outer envelope pore protein 16, chloroplastic;Amino acid selective channel protein;Mitochondrial inner membrane translocase subunit Tim17/Tim22/Tim23/peroxisomal protein PMP24
BaRT2v18chr1HG002840	Outer envelope pore protein 16, chloroplastic;Amino acid selective channel protein;Mitochondrial inner membrane translocase subunit Tim17/Tim22/Tim23/peroxisomal protein PMP24
BaRT2v18chr1HG002840
BaRT2v18chr1HG002840
BaRT2v18chr1HG002840
BaRT2v18chr1HG002840
BaRT2v18chr1HG002840
BaRT2v18chr1HG002850
BaRT2v18chr1HG002850
BaRT2v18chr1HG002850
BaRT2v18chr1HG002850
BaRT2v18chr1HG002850
BaRT2v18chr1HG002850
BaRT2v18chr1HG002850
BaRT2v18chr1HG002850	Outer envelope pore protein 16, chloroplastic;Amino acid selective channel protein;Mitochondrial inner membrane translocase subunit Tim17/Tim22/Tim23/peroxisomal protein PMP24
BaRT2v18chr1HG002850
BaRT2v18chr1HG002850
BaRT2v18chr1HG002860
BaRT2v18chr1HG002860
BaRT2v18chr1HG002860
BaRT2v18chr1HG002860
BaRT2v18chr1HG002860
BaRT2v18chr1HG002860
BaRT2v18chr1HG002860
BaRT2v18chr1HG002860
BaRT2v18chr1HG002860
BaRT2v18chr1HG002860
BaRT2v18chr1HG002860
BaRT2v18chr1HG002860
BaRT2v18chr1HG002870
BaRT2v18chr1HG002870
BaRT2v18chr1HG002880	Protein-serine/threonine phosphatase
BaRT2v18chr1HG002890
BaRT2v18chr1HG002890
BaRT2v18chr1HG002890
BaRT2v18chr1HG002890	Pectin acetylesterase
BaRT2v18chr1HG002890
BaRT2v18chr1HG002890
BaRT2v18chr1HG002890
BaRT2v18chr1HG002890
BaRT2v18chr1HG002890	Pectin acetylesterase
BaRT2v18chr1HG002890
BaRT2v18chr1HG002890	Pectin acetylesterase
BaRT2v18chr1HG002900	NB-ARC domain-containing protein
BaRT2v18chr1HG002910	Plastocyanin-like domain-containing protein
BaRT2v18chr1HG002910
BaRT2v18chr1HG002920
BaRT2v18chr1HG002930
BaRT2v18chr1HG002930	4Fe-4S ferredoxin-type domain-containing protein
BaRT2v18chr1HG002930	4Fe-4S ferredoxin-type domain-containing protein
BaRT2v18chr1HG002940
BaRT2v18chr1HG002950
BaRT2v18chr1HG002960	E3 ubiquitin-protein ligase XB3;Putative E3 ubiquitin-protein ligase XBAT31;Ankyrin repeat domain-containing protein 28
BaRT2v18chr1HG002960
BaRT2v18chr1HG002960
BaRT2v18chr1HG002960	E3 ubiquitin-protein ligase XB3;Putative E3 ubiquitin-protein ligase XBAT31;Ankyrin repeat domain-containing protein 28
BaRT2v18chr1HG002960
BaRT2v18chr1HG002960	E3 ubiquitin-protein ligase XB3;Putative E3 ubiquitin-protein ligase XBAT31;Putative hop-interacting protein-like;Ankyrin repeat domain-containing protein 28
BaRT2v18chr1HG002960
BaRT2v18chr1HG002960
BaRT2v18chr1HG002960
BaRT2v18chr1HG002960	E3 ubiquitin-protein ligase XB3;Putative E3 ubiquitin-protein ligase XBAT31;Ankyrin repeat domain-containing protein 28
BaRT2v18chr1HG002960	E3 ubiquitin-protein ligase XB3;Putative E3 ubiquitin-protein ligase XBAT31;Putative hop-interacting protein-like;Ankyrin repeat domain-containing protein 28
BaRT2v18chr1HG002960
BaRT2v18chr1HG002960	E3 ubiquitin-protein ligase XB3;Putative E3 ubiquitin-protein ligase XBAT31;Ankyrin repeat domain-containing protein 28
BaRT2v18chr1HG002960
BaRT2v18chr1HG002960
BaRT2v18chr1HG002960	E3 ubiquitin-protein ligase XB3;Putative E3 ubiquitin-protein ligase XBAT31;Ankyrin repeat domain-containing protein 28
BaRT2v18chr1HG002960
BaRT2v18chr1HG002960	E3 ubiquitin-protein ligase XB3;Putative E3 ubiquitin-protein ligase XBAT31;Putative hop-interacting protein-like;Ankyrin repeat domain-containing protein 28
BaRT2v18chr1HG002960	E3 ubiquitin-protein ligase XBAT31-like (Fragment);Ring zinc finger protein
BaRT2v18chr1HG002960	E3 ubiquitin-protein ligase XB3;Putative E3 ubiquitin-protein ligase XBAT31;Ankyrin repeat domain-containing protein 28
BaRT2v18chr1HG002960
BaRT2v18chr1HG002960	E3 ubiquitin-protein ligase XB3;Putative E3 ubiquitin-protein ligase XBAT31;Putative hop-interacting protein-like;Ankyrin repeat domain-containing protein 28
BaRT2v18chr1HG002960	E3 ubiquitin-protein ligase XB3;Putative E3 ubiquitin-protein ligase XBAT31;Putative hop-interacting protein-like;Ankyrin repeat domain-containing protein 28
BaRT2v18chr1HG002960	E3 ubiquitin-protein ligase XB3;Putative E3 ubiquitin-protein ligase XBAT31;Ankyrin repeat domain-containing protein 28
BaRT2v18chr1HG002960
BaRT2v18chr1HG002960	E3 ubiquitin-protein ligase XB3;Putative E3 ubiquitin-protein ligase XBAT31;Ankyrin repeat domain-containing protein 28
BaRT2v18chr1HG002960
BaRT2v18chr1HG002960	E3 ubiquitin-protein ligase XB3;Putative E3 ubiquitin-protein ligase XBAT31;Putative hop-interacting protein-like;Ankyrin repeat domain-containing protein 28
BaRT2v18chr1HG002960
BaRT2v18chr1HG002960	E3 ubiquitin-protein ligase XB3;Putative E3 ubiquitin-protein ligase XBAT31;Putative hop-interacting protein-like;Ankyrin repeat domain-containing protein 28
BaRT2v18chr1HG002960
BaRT2v18chr1HG002960
BaRT2v18chr1HG002960
BaRT2v18chr1HG002960
BaRT2v18chr1HG002960	E3 ubiquitin-protein ligase XB3;Putative E3 ubiquitin-protein ligase XBAT31;Putative hop-interacting protein-like;Ankyrin repeat domain-containing protein 28
BaRT2v18chr1HG002960	E3 ubiquitin-protein ligase XB3;Putative E3 ubiquitin-protein ligase XBAT31;Ankyrin repeat domain-containing protein 28
BaRT2v18chr1HG002960
BaRT2v18chr1HG002960
BaRT2v18chr1HG002960
BaRT2v18chr1HG002960
BaRT2v18chr1HG002960
BaRT2v18chr1HG002960
BaRT2v18chr1HG002970
BaRT2v18chr1HG002980
BaRT2v18chr1HG002990
BaRT2v18chr1HG003000	Putative clathrin assembly protein;ENTH domain-containing protein;ANTH domain-containing protein
BaRT2v18chr1HG003010
BaRT2v18chr1HG003010	Nuclear pore complex protein NUP43
BaRT2v18chr1HG003020	DNA binding with one finger3;Dof-type domain-containing protein;Dof zinc finger protein DOF3.6
BaRT2v18chr1HG003020
BaRT2v18chr1HG003020	Dof-type domain-containing protein;DNA binding with one finger3;Dof zinc finger protein DOF3.6;Transcription factor DP isoform 1
BaRT2v18chr1HG003030
BaRT2v18chr1HG003040	Embryo defective
BaRT2v18chr1HG003040	Embryo defective
BaRT2v18chr1HG003050
BaRT2v18chr1HG003060	Homeobox-leucine zipper protein ROC4;Homeobox domain-containing protein
BaRT2v18chr1HG003060
BaRT2v18chr1HG003070
BaRT2v18chr1HG003080	Disease resistance protein RPM1
BaRT2v18chr1HG003090	Disease resistance protein RPM1
BaRT2v18chr1HG003100	Wall-associated receptor kinase-like 8
BaRT2v18chr1HG003100	Wall-associated receptor kinase-like 8
BaRT2v18chr1HG003110
BaRT2v18chr1HG003110
BaRT2v18chr1HG003120	Disease resistance protein RPM1
BaRT2v18chr1HG003120	Disease resistance protein RPM1
BaRT2v18chr1HG003120	Disease resistance protein RPM1
BaRT2v18chr1HG003120	NB-ARC domain-containing protein;Disease resistance protein RPM1
BaRT2v18chr1HG003120	Disease resistance protein RPM1
BaRT2v18chr1HG003130	Disease resistance protein RPM1
BaRT2v18chr1HG003130	Disease resistance protein RPM1
BaRT2v18chr1HG003140
BaRT2v18chr1HG003140
BaRT2v18chr1HG003150
BaRT2v18chr1HG003160
BaRT2v18chr1HG003160
BaRT2v18chr1HG003160
BaRT2v18chr1HG003160
BaRT2v18chr1HG003170
BaRT2v18chr1HG003170
BaRT2v18chr1HG003170	ACT domain-containing protein ACR9
BaRT2v18chr1HG003170	ACT domain-containing protein ACR9
BaRT2v18chr1HG003170	ACT domain-containing protein ACR9
BaRT2v18chr1HG003170
BaRT2v18chr1HG003170	ACT domain-containing protein ACR9
BaRT2v18chr1HG003170	ACT domain-containing protein ACR9
BaRT2v18chr1HG003170	ACT domain-containing protein ACR9
BaRT2v18chr1HG003180	Galectin domain-containing protein;Hydroxyproline O-galactosyltransferase GALT6;Galactosyltransferase family protein, putative, expressed;Putative beta-1,3-galactosyltransferase 19;Galactosyltransferase, putative
BaRT2v18chr1HG003180
BaRT2v18chr1HG003180	Galectin domain-containing protein;hydroxyproline O-galactosyltransferase GALT6-like;Galactosyltransferase family protein, putative, expressed;Putative beta-1,3-galactosyltransferase 19
BaRT2v18chr1HG003190
BaRT2v18chr1HG003200	Protein kinase domain-containing protein
BaRT2v18chr1HG003210	Disease resistance protein RPM1
BaRT2v18chr1HG003220	zerumbone synthase-like;momilactone A synthase-like;Sex determination protein tasselseed-2;NAD dependent epimerase/dehydratase family protein, expressed;Secoisolariciresinol dehydrogenase-like
BaRT2v18chr1HG003230	thaumatin-like protein 1b;Thaumatin-like protein 1a;Thaumatin-like protein 1;Pathogenesis-related thaumatin superfamily protein;Pathogenesis-related protein 5
BaRT2v18chr1HG003240
BaRT2v18chr1HG003250	Cation/H(+) antiporter 20;Cation/H+ exchanger
BaRT2v18chr1HG003260
BaRT2v18chr1HG003270
BaRT2v18chr1HG003280
BaRT2v18chr1HG003280
BaRT2v18chr1HG003290
BaRT2v18chr1HG003300
BaRT2v18chr1HG003310
BaRT2v18chr1HG003310
BaRT2v18chr1HG003310
BaRT2v18chr1HG003310
BaRT2v18chr1HG003310
BaRT2v18chr1HG003310
BaRT2v18chr1HG003310
BaRT2v18chr1HG003320	Actin-depolymerizing factor 1;ADF-H domain-containing protein
BaRT2v18chr1HG003320	Actin-depolymerizing factor 1;ADF-H domain-containing protein
BaRT2v18chr1HG003320	Actin-depolymerizing factor 1;ADF-H domain-containing protein
BaRT2v18chr1HG003330
BaRT2v18chr1HG003340	BRI1-KD interacting protein 130
BaRT2v18chr1HG003350
BaRT2v18chr1HG003360
BaRT2v18chr1HG003370
BaRT2v18chr1HG003370
BaRT2v18chr1HG003370
BaRT2v18chr1HG003370
BaRT2v18chr1HG003370
BaRT2v18chr1HG003370
BaRT2v18chr1HG003370
BaRT2v18chr1HG003370
BaRT2v18chr1HG003370
BaRT2v18chr1HG003370
BaRT2v18chr1HG003370
BaRT2v18chr1HG003370
BaRT2v18chr1HG003370
BaRT2v18chr1HG003380
BaRT2v18chr1HG003380
BaRT2v18chr1HG003380
BaRT2v18chr1HG003390	Inorganic diphosphatase
BaRT2v18chr1HG003390	Inorganic diphosphatase
BaRT2v18chr1HG003390
BaRT2v18chr1HG003390
BaRT2v18chr1HG003390	Inorganic diphosphatase
BaRT2v18chr1HG003390	Inorganic diphosphatase
BaRT2v18chr1HG003390
BaRT2v18chr1HG003400
BaRT2v18chr1HG003400
BaRT2v18chr1HG003400	Poly [ADP-ribose] polymerase;Poly(ADP-ribose) polymerase2
BaRT2v18chr1HG003400	Poly [ADP-ribose] polymerase;Poly(ADP-ribose) polymerase2
BaRT2v18chr1HG003400
BaRT2v18chr1HG003400	Poly [ADP-ribose] polymerase
BaRT2v18chr1HG003400	Poly [ADP-ribose] polymerase
BaRT2v18chr1HG003400	Poly [ADP-ribose] polymerase
BaRT2v18chr1HG003400
BaRT2v18chr1HG003400
BaRT2v18chr1HG003400
BaRT2v18chr1HG003400
BaRT2v18chr1HG003410
BaRT2v18chr1HG003410
BaRT2v18chr1HG003420
BaRT2v18chr1HG003420
BaRT2v18chr1HG003420
BaRT2v18chr1HG003420
BaRT2v18chr1HG003420
BaRT2v18chr1HG003430
BaRT2v18chr1HG003430	Leucine-rich repeat receptor-like protein kinase PXL1 (Fragment)
BaRT2v18chr1HG003430
BaRT2v18chr1HG003430
BaRT2v18chr1HG003430
BaRT2v18chr1HG003430
BaRT2v18chr1HG003430
BaRT2v18chr1HG003440	Reverse transcriptase
BaRT2v18chr1HG003440
BaRT2v18chr1HG003450
BaRT2v18chr1HG003450
BaRT2v18chr1HG003450
BaRT2v18chr1HG003450
BaRT2v18chr1HG003450
BaRT2v18chr1HG003450
BaRT2v18chr1HG003450
BaRT2v18chr1HG003450
BaRT2v18chr1HG003450
BaRT2v18chr1HG003450
BaRT2v18chr1HG003450
BaRT2v18chr1HG003450
BaRT2v18chr1HG003450
BaRT2v18chr1HG003460
BaRT2v18chr1HG003470
BaRT2v18chr1HG003470	Truncated powdery mildew resistance protein Pm3;NB-ARC domain containing protein, expressed
BaRT2v18chr1HG003470	Truncated powdery mildew resistance protein Pm3;NB-ARC domain containing protein, expressed
BaRT2v18chr1HG003480
BaRT2v18chr1HG003490
BaRT2v18chr1HG003500
BaRT2v18chr1HG003510
BaRT2v18chr1HG003520	Protein MICRORCHIDIA 1;MORC family CW-type zinc finger protein 4
BaRT2v18chr1HG003520	Protein MICRORCHIDIA 1;MORC family CW-type zinc finger protein 4
BaRT2v18chr1HG003520
BaRT2v18chr1HG003520
BaRT2v18chr1HG003520	Protein MICRORCHIDIA 1;MORC family CW-type zinc finger protein 4
BaRT2v18chr1HG003520	Protein MICRORCHIDIA 1;MORC family CW-type zinc finger protein 4
BaRT2v18chr1HG003520	Protein MICRORCHIDIA 1;MORC family CW-type zinc finger protein 4
BaRT2v18chr1HG003520
BaRT2v18chr1HG003520	Protein MICRORCHIDIA like;MORC family CW-type zinc finger protein 4
BaRT2v18chr1HG003520	Protein MICRORCHIDIA 1;MORC family CW-type zinc finger protein 4
BaRT2v18chr1HG003520
BaRT2v18chr1HG003520
BaRT2v18chr1HG003520	Protein MICRORCHIDIA 1;MORC family CW-type zinc finger protein 4
BaRT2v18chr1HG003530	Heme O synthase
BaRT2v18chr1HG003540
BaRT2v18chr1HG003550	Glucose-6-phosphate isomerase;Glucose-6-phosphate isomerase, cytosolic
BaRT2v18chr1HG003550	Glucose-6-phosphate isomerase, cytosolic 1;Glucose-6-phosphate isomerase
BaRT2v18chr1HG003550	Glucose-6-phosphate isomerase, cytosolic 1;Glucose-6-phosphate isomerase
BaRT2v18chr1HG003550	Glucose-6-phosphate isomerase, cytosolic 1;Glucose-6-phosphate isomerase
BaRT2v18chr1HG003550	Glucose-6-phosphate isomerase, cytosolic 1;Glucose-6-phosphate isomerase
BaRT2v18chr1HG003550	Glucose-6-phosphate isomerase
BaRT2v18chr1HG003550	Glucose-6-phosphate isomerase
BaRT2v18chr1HG003550	Glucose-6-phosphate isomerase
BaRT2v18chr1HG003560	Phragmoplastin interacting protein 1;Zinc finger, CCHC-type, Nucleotide-binding alpha-beta plait domain, Zinc knuckle CX2CX4HX4C;28 kDa ribonucleoprotein;DNA-binding protein HEXBP;RNA-binding protein 34
BaRT2v18chr1HG003560	Phragmoplastin interacting protein 1;Zinc finger, CCHC-type, Nucleotide-binding alpha-beta plait domain, Zinc knuckle CX2CX4HX4C;28 kDa ribonucleoprotein;RNA-binding protein 34;DNA-binding protein HEXBP;Putative transcription factor interactor and regulator CCHC(Zn) family
BaRT2v18chr1HG003560	Phragmoplastin interacting protein 1;Zinc finger, CCHC-type, Nucleotide-binding alpha-beta plait domain, Zinc knuckle CX2CX4HX4C;33 kDa ribonucleoprotein, chloroplastic;DNA-binding protein HEXBP;Putative transcription factor interactor and regulator CCHC(Zn) family
BaRT2v18chr1HG003560	Phragmoplastin interacting protein 1;Zinc finger, CCHC-type, Nucleotide-binding alpha-beta plait domain, Zinc knuckle CX2CX4HX4C;33 kDa ribonucleoprotein, chloroplastic;DNA-binding protein HEXBP;Putative transcription factor interactor and regulator CCHC(Zn) family
BaRT2v18chr1HG003570	Zinc finger protein ZAT5;C2H2-type domain-containing protein
BaRT2v18chr1HG003580
BaRT2v18chr1HG003580
BaRT2v18chr1HG003590
BaRT2v18chr1HG003600
BaRT2v18chr1HG003600
BaRT2v18chr1HG003600
BaRT2v18chr1HG003610
BaRT2v18chr1HG003610
BaRT2v18chr1HG003610
BaRT2v18chr1HG003610
BaRT2v18chr1HG003610
BaRT2v18chr1HG003610
BaRT2v18chr1HG003620	Type I inositol polyphosphate 5-phosphatase 8;IPPc domain-containing protein
BaRT2v18chr1HG003620	Type I inositol polyphosphate 5-phosphatase 8;IPPc domain-containing protein
BaRT2v18chr1HG003630	B3 domain-containing protein;TF-B3 domain-containing protein
BaRT2v18chr1HG003630	TF-B3 domain-containing protein;B3 domain-containing protein
BaRT2v18chr1HG003630	TF-B3 domain-containing protein;B3 domain-containing protein
BaRT2v18chr1HG003630	TF-B3 domain-containing protein;B3 domain-containing protein
BaRT2v18chr1HG003630	B3 domain-containing protein;TF-B3 domain-containing protein
BaRT2v18chr1HG003630
BaRT2v18chr1HG003630
BaRT2v18chr1HG003630
BaRT2v18chr1HG003630
BaRT2v18chr1HG003630
BaRT2v18chr1HG003630	TF-B3 domain-containing protein;B3 domain-containing protein
BaRT2v18chr1HG003630
BaRT2v18chr1HG003630	TF-B3 domain-containing protein;B3 domain-containing protein
BaRT2v18chr1HG003630	TF-B3 domain-containing protein
BaRT2v18chr1HG003630	B3 domain-containing protein;TF-B3 domain-containing protein
BaRT2v18chr1HG003640	Calcium permeable stress-gated cation channel 1
BaRT2v18chr1HG003640	Calcium permeable stress-gated cation channel 1
BaRT2v18chr1HG003640
BaRT2v18chr1HG003640
BaRT2v18chr1HG003640	Calcium permeable stress-gated cation channel 1
BaRT2v18chr1HG003640	Calcium permeable stress-gated cation channel 1
BaRT2v18chr1HG003650	Calcium-transporting ATPase 4, endoplasmic reticulum-type;Calcium pump1
BaRT2v18chr1HG003650	Calcium-transporting ATPase 4, endoplasmic reticulum-type;Calcium pump1
BaRT2v18chr1HG003650	Calcium-transporting ATPase 4, endoplasmic reticulum-type;Calcium pump1
BaRT2v18chr1HG003660
BaRT2v18chr1HG003670
BaRT2v18chr1HG003670
BaRT2v18chr1HG003680	Putative hAT dimerization domain, ribonuclease H-like domain protein (Fragment);DUF659 domain-containing protein
BaRT2v18chr1HG003680	Putative hAT dimerization domain, ribonuclease H-like domain protein (Fragment);DUF659 domain-containing protein
BaRT2v18chr1HG003680	Putative hAT dimerization domain, ribonuclease H-like domain protein (Fragment);DUF659 domain-containing protein
BaRT2v18chr1HG003680	Putative hAT dimerization domain, ribonuclease H-like domain protein (Fragment);DUF659 domain-containing protein
BaRT2v18chr1HG003690
BaRT2v18chr1HG003690
BaRT2v18chr1HG003690
BaRT2v18chr1HG003690
BaRT2v18chr1HG003700
BaRT2v18chr1HG003710
BaRT2v18chr1HG003720
BaRT2v18chr1HG003730
BaRT2v18chr1HG003740
BaRT2v18chr1HG003750
BaRT2v18chr1HG003750
BaRT2v18chr1HG003750
BaRT2v18chr1HG003750
BaRT2v18chr1HG003750
BaRT2v18chr1HG003750
BaRT2v18chr1HG003750
BaRT2v18chr1HG003750
BaRT2v18chr1HG003750
BaRT2v18chr1HG003750
BaRT2v18chr1HG003750
BaRT2v18chr1HG003750
BaRT2v18chr1HG003750
BaRT2v18chr1HG003750
BaRT2v18chr1HG003750
BaRT2v18chr1HG003750
BaRT2v18chr1HG003750
BaRT2v18chr1HG003760	E3 UFM1-protein ligase 1 homolog
BaRT2v18chr1HG003760
BaRT2v18chr1HG003760	E3 UFM1-protein ligase 1 homolog
BaRT2v18chr1HG003760
BaRT2v18chr1HG003760
BaRT2v18chr1HG003760	E3 UFM1-protein ligase 1 homolog
BaRT2v18chr1HG003760
BaRT2v18chr1HG003760	E3 UFM1-protein ligase 1 homolog
BaRT2v18chr1HG003770
BaRT2v18chr1HG003780
BaRT2v18chr1HG003780	Protein trichome birefringence-like 11
BaRT2v18chr1HG003780	Protein trichome birefringence-like 10
BaRT2v18chr1HG003780	Protein trichome birefringence-like 11;CAS1 domain-containing 1;PMR5N domain-containing protein (Fragment)
BaRT2v18chr1HG003780	Protein trichome birefringence-like 10
BaRT2v18chr1HG003790	Nudix hydrolase domain-containing protein
BaRT2v18chr1HG003790	Nudix hydrolase domain-containing protein
BaRT2v18chr1HG003790	Nudix hydrolase domain-containing protein
BaRT2v18chr1HG003800
BaRT2v18chr1HG003810
BaRT2v18chr1HG003820
BaRT2v18chr1HG003830
BaRT2v18chr1HG003840
BaRT2v18chr1HG003850	Glycosyltransferase-like KOBITO 1;Glycosyltransferase family 92 protein
BaRT2v18chr1HG003850	Glycosyltransferase-like KOBITO 1;Glycosyltransferase family 92 protein
BaRT2v18chr1HG003850	Glycosyltransferase-like KOBITO 1;Glycosyltransferase family 92 protein
BaRT2v18chr1HG003850	Glycosyltransferase-like KOBITO 1;Glycosyltransferase family 92 protein
BaRT2v18chr1HG003850	Glycosyltransferase-like KOBITO 1;Glycosyltransferase family 92 protein
BaRT2v18chr1HG003850
BaRT2v18chr1HG003850	Glycosyltransferase-like KOBITO 1;Glycosyltransferase family 92 protein
BaRT2v18chr1HG003860
BaRT2v18chr1HG003860	Glycosyltransferase
BaRT2v18chr1HG003870
BaRT2v18chr1HG003880
BaRT2v18chr1HG003890
BaRT2v18chr1HG003890	Indole-2-monooxygenase;Putative ferulate 5-hydroxylase;Indolin-2-one monooxygenase
BaRT2v18chr1HG003890	Indole-2-monooxygenase;Putative ferulate 5-hydroxylase;Indolin-2-one monooxygenase
BaRT2v18chr1HG003900	Cinnamyl alcohol dehydrogenase;Cinnamyl-alcohol dehydrogenase
BaRT2v18chr1HG003900
BaRT2v18chr1HG003910
BaRT2v18chr1HG003920	Glycosyltransferase
BaRT2v18chr1HG003920
BaRT2v18chr1HG003920	Glycosyltransferase
BaRT2v18chr1HG003930
BaRT2v18chr1HG003940
BaRT2v18chr1HG003950	4-hydroxyphenylacetaldehyde oxime monooxygenase
BaRT2v18chr1HG003950
BaRT2v18chr1HG003950
BaRT2v18chr1HG003950	4-hydroxyphenylacetaldehyde oxime monooxygenase
BaRT2v18chr1HG003950
BaRT2v18chr1HG003950
BaRT2v18chr1HG003960
BaRT2v18chr1HG003960
BaRT2v18chr1HG003970
BaRT2v18chr1HG003980	Indole-2-monooxygenase-like;Putative ferulate 5-hydroxylase;Indolin-2-one monooxygenase
BaRT2v18chr1HG003980
BaRT2v18chr1HG003990
BaRT2v18chr1HG004000	Tyrosine N-monooxygenase
BaRT2v18chr1HG004000	Tyrosine N-monooxygenase
BaRT2v18chr1HG004000	Tyrosine N-monooxygenase
BaRT2v18chr1HG004000	Tyrosine N-monooxygenase;Isoleucine N-monooxygenase 2-like
BaRT2v18chr1HG004000	Tyrosine N-monooxygenase
BaRT2v18chr1HG004000	Tyrosine N-monooxygenase
BaRT2v18chr1HG004000	Tyrosine N-monooxygenase-like;Phenylalanine N-monooxygenase
BaRT2v18chr1HG004000
BaRT2v18chr1HG004000
BaRT2v18chr1HG004000
BaRT2v18chr1HG004010
BaRT2v18chr1HG004020
BaRT2v18chr1HG004020	DJ-1 protein homolog E;DJ-1 protein homolog F;Intracellular protease, PfpI family protein, expressed;Class I glutamine amidotransferase-like superfamily protein;DJ-1 protein-like protein E-like
BaRT2v18chr1HG004020	DJ-1 protein homolog E;DJ-1 protein homolog F;Intracellular protease, PfpI family protein, expressed;Class I glutamine amidotransferase-like superfamily protein;DJ-1 protein-like protein E-like
BaRT2v18chr1HG004020
BaRT2v18chr1HG004020
BaRT2v18chr1HG004030	Protein DETOXIFICATION
BaRT2v18chr1HG004030
BaRT2v18chr1HG004040	Protein kinase domain-containing protein
BaRT2v18chr1HG004050
BaRT2v18chr1HG004060
BaRT2v18chr1HG004070
BaRT2v18chr1HG004070
BaRT2v18chr1HG004080	F-box domain-containing protein
BaRT2v18chr1HG004080	F-box domain-containing protein
BaRT2v18chr1HG004080	F-box domain-containing protein
BaRT2v18chr1HG004080	F-box domain-containing protein
BaRT2v18chr1HG004080	F-box domain-containing protein
BaRT2v18chr1HG004080	F-box domain-containing protein
BaRT2v18chr1HG004090	PMEI domain-containing protein;Pectinesterase inhibitor
BaRT2v18chr1HG004100	Dehydroascorbate reductase;Putative glutathione S-transferase DHAR4;S-crystallin;Glutathione S-transferase DHAR2;Chloride intracellular channel 6
BaRT2v18chr1HG004100	Dehydroascorbate reductase;Putative glutathione S-transferase DHAR4;S-crystallin;Glutathione S-transferase DHAR2;Chloride intracellular channel 6
BaRT2v18chr1HG004110	Glutelin type-A 1;11S globulin seed storage protein 2
BaRT2v18chr1HG004110	Glutelin type-A 1;11S globulin seed storage protein 2
BaRT2v18chr1HG004120
BaRT2v18chr1HG004120
BaRT2v18chr1HG004130
BaRT2v18chr1HG004130
BaRT2v18chr1HG004130
BaRT2v18chr1HG004130
BaRT2v18chr1HG004130
BaRT2v18chr1HG004130	Beta-hexosaminidase
BaRT2v18chr1HG004130	Beta-N-acetylhexosaminidase
BaRT2v18chr1HG004130
BaRT2v18chr1HG004130
BaRT2v18chr1HG004130
BaRT2v18chr1HG004130
BaRT2v18chr1HG004130
BaRT2v18chr1HG004130
BaRT2v18chr1HG004130
BaRT2v18chr1HG004130
BaRT2v18chr1HG004130
BaRT2v18chr1HG004130
BaRT2v18chr1HG004130
BaRT2v18chr1HG004130	Beta-hexosaminidase
BaRT2v18chr1HG004130
BaRT2v18chr1HG004130
BaRT2v18chr1HG004130	Beta-hexosaminidase
BaRT2v18chr1HG004130
BaRT2v18chr1HG004130
BaRT2v18chr1HG004130
BaRT2v18chr1HG004130
BaRT2v18chr1HG004130
BaRT2v18chr1HG004130
BaRT2v18chr1HG004130-BaRT2v18chr1HG004140	Beta-hexosaminidase
BaRT2v18chr1HG004140	Protein-tyrosine-phosphatase MKP1
BaRT2v18chr1HG004140	Protein-tyrosine-phosphatase MKP1;MAP kinase phosphatase;Dual specificity phosphatase
BaRT2v18chr1HG004140	Protein-tyrosine-phosphatase MKP1;MAP kinase phosphatase;Dual specificity phosphatase
BaRT2v18chr1HG004150
BaRT2v18chr1HG004160
BaRT2v18chr1HG004170
BaRT2v18chr1HG004180
BaRT2v18chr1HG004190
BaRT2v18chr1HG004190	MADS-box transcription factor 27;Agamous-like MADS-box protein AGL16;K-box domain-containing protein
BaRT2v18chr1HG004190
BaRT2v18chr1HG004190	MADS-box transcription factor;Agamous-like MADS-box protein AGL16
BaRT2v18chr1HG004190
BaRT2v18chr1HG004200	Agamous-like MADS-box protein AGL16;agamous-like MADS-box protein AGL21 isoform X2;MADS-box transcription factor 27;MADS-box protein 14;ABC transporter G family member 16-like;MADS-box transcription factor, plant
BaRT2v18chr1HG004200	MADS-box transcription factor 27;Agamous-like MADS-box protein AGL16;Sepallata 1;K-box domain-containing protein;MADS-box transcription factor, plant
BaRT2v18chr1HG004200	MADS-box transcription factor 27;Agamous-like MADS-box protein AGL16;Sepallata 1;K-box domain-containing protein;MADS-box transcription factor, plant
BaRT2v18chr1HG004200
BaRT2v18chr1HG004210
BaRT2v18chr1HG004210
BaRT2v18chr1HG004210	UDP-galactose/UDP-glucose transporter 5;UDP-galactose/UDP-glucose transporter 5B;Adenosine 3'-phospho 5'-phosphosulfate transporter;UAA transporter
BaRT2v18chr1HG004210
BaRT2v18chr1HG004220
BaRT2v18chr1HG004230
BaRT2v18chr1HG004230	7,8-dihydroneopterin aldolase
BaRT2v18chr1HG004230-BaRT2v18chr1HG004240	YTH domain-containing protein;Evolutionarily conserved C-terminal region 5
BaRT2v18chr1HG004240	YTH domain-containing protein;Evolutionarily conserved C-terminal region 5
BaRT2v18chr1HG004240
BaRT2v18chr1HG004240
BaRT2v18chr1HG004240
BaRT2v18chr1HG004240
BaRT2v18chr1HG004240	YTH domain-containing protein;Evolutionarily conserved C-terminal region 5
BaRT2v18chr1HG004240
BaRT2v18chr1HG004250	Laccase
BaRT2v18chr1HG004260	citrate-binding protein-like;Citrate-binding protein, putative;Citrate binding protein, putative, expressed
BaRT2v18chr1HG004270
BaRT2v18chr1HG004270
BaRT2v18chr1HG004270
BaRT2v18chr1HG004270	RNA polymerase II transcription factor SIII (Elongin) subunit A;Elongin-A
BaRT2v18chr1HG004270	RNA polymerase II transcription factor SIII (Elongin) subunit A;Elongin-A
BaRT2v18chr1HG004270	RNA polymerase II transcription factor SIII (Elongin) subunit A;Elongin-A
BaRT2v18chr1HG004280
BaRT2v18chr1HG004290	ENT domain-containing protein
BaRT2v18chr1HG004290	ENT domain-containing protein
BaRT2v18chr1HG004300
BaRT2v18chr1HG004300
BaRT2v18chr1HG004300
BaRT2v18chr1HG004300
BaRT2v18chr1HG004300
BaRT2v18chr1HG004300
BaRT2v18chr1HG004300
BaRT2v18chr1HG004300
BaRT2v18chr1HG004300
BaRT2v18chr1HG004300
BaRT2v18chr1HG004300
BaRT2v18chr1HG004300
BaRT2v18chr1HG004300
BaRT2v18chr1HG004300
BaRT2v18chr1HG004300
BaRT2v18chr1HG004300
BaRT2v18chr1HG004310
BaRT2v18chr1HG004320	Nuclear protein-like;Coiled-coil domain-containing protein 130;coiled-coil domain-containing protein 130-like;Coiled-coil domain-containing protein 94;Coiled-coil domain-containing protein, putative
BaRT2v18chr1HG004320	Nuclear protein-like;DUF572-domain-containing protein;Putative Coiled-coil domain-containing protein
BaRT2v18chr1HG004320	Nuclear protein-like;Coiled-coil domain-containing protein 130;coiled-coil domain-containing protein 130-like;Coiled-coil domain-containing protein 94;Coiled-coil domain-containing protein, putative
BaRT2v18chr1HG004320	Nuclear protein-like;Coiled-coil domain-containing protein 130;coiled-coil domain-containing protein 130-like;Coiled-coil domain-containing protein 94
BaRT2v18chr1HG004320	Nuclear protein-like;DUF572-domain-containing protein;Putative Coiled-coil domain-containing protein
BaRT2v18chr1HG004320
BaRT2v18chr1HG004320	Nuclear protein-like;Coiled-coil domain-containing protein 130;coiled-coil domain-containing protein 130-like;Coiled-coil domain-containing protein 94
BaRT2v18chr1HG004320	Nuclear protein-like;Coiled-coil domain-containing protein 130;coiled-coil domain-containing protein 130-like;Coiled-coil domain-containing protein 94;Coiled-coil domain-containing protein, putative
BaRT2v18chr1HG004320	Nuclear protein-like;Coiled-coil domain-containing protein 130;coiled-coil domain-containing protein 130-like;Coiled-coil domain-containing protein 94
BaRT2v18chr1HG004320
BaRT2v18chr1HG004330
BaRT2v18chr1HG004340
BaRT2v18chr1HG004350
BaRT2v18chr1HG004360	Histone-lysine N-methyltransferase family member SUVH9;Histone-lysine N-methyltransferase family member SUVH2;Histone H3 (Lys9) methyltransferase SUV39H1/Clr4, required for transcriptional silencing
BaRT2v18chr1HG004370
BaRT2v18chr1HG004380	Kinetochore protein like
BaRT2v18chr1HG004390
BaRT2v18chr1HG004400
BaRT2v18chr1HG004410
BaRT2v18chr1HG004410
BaRT2v18chr1HG004410
BaRT2v18chr1HG004410
BaRT2v18chr1HG004410	Transcription factor MYB48;Myb-related protein MYBAS2;Transcription factor MYB59;myb-related protein MYBAS1;MYB transcription factor
BaRT2v18chr1HG004410
BaRT2v18chr1HG004420
BaRT2v18chr1HG004430
BaRT2v18chr1HG004430
BaRT2v18chr1HG004430
BaRT2v18chr1HG004430
BaRT2v18chr1HG004430
BaRT2v18chr1HG004440
BaRT2v18chr1HG004450	DnaJ subfamily B member 12;Curved DNA-binding protein
BaRT2v18chr1HG004450	DnaJ subfamily B member 12;Curved DNA-binding protein
BaRT2v18chr1HG004450	DnaJ subfamily B member 12;Curved DNA-binding protein
BaRT2v18chr1HG004450	DnaJ subfamily B member 12;Curved DNA-binding protein
BaRT2v18chr1HG004450	DnaJ subfamily B member 12;Curved DNA-binding protein
BaRT2v18chr1HG004460
BaRT2v18chr1HG004470
BaRT2v18chr1HG004470
BaRT2v18chr1HG004470
BaRT2v18chr1HG004480
BaRT2v18chr1HG004490
BaRT2v18chr1HG004490
BaRT2v18chr1HG004500	LRR receptor-like serine/threonine-protein kinase GSO1;Leucine-rich repeat receptor protein kinase EMS1
BaRT2v18chr1HG004510
BaRT2v18chr1HG004510
BaRT2v18chr1HG004510	Potassium transporter
BaRT2v18chr1HG004510
BaRT2v18chr1HG004510
BaRT2v18chr1HG004510
BaRT2v18chr1HG004510
BaRT2v18chr1HG004510	Potassium transporter
BaRT2v18chr1HG004510
BaRT2v18chr1HG004520	Cytochrome P450 family protein, expressed;Geraniol 8-hydroxylase
BaRT2v18chr1HG004530
BaRT2v18chr1HG004540
BaRT2v18chr1HG004540
BaRT2v18chr1HG004550
BaRT2v18chr1HG004560
BaRT2v18chr1HG004560
BaRT2v18chr1HG004560
BaRT2v18chr1HG004560
BaRT2v18chr1HG004560
BaRT2v18chr1HG004560
BaRT2v18chr1HG004560
BaRT2v18chr1HG004560
BaRT2v18chr1HG004560
BaRT2v18chr1HG004560
BaRT2v18chr1HG004570	Putative receptor kinase Lecrk;Putative receptor-type protein kinase LRK1;Protein kinase domain-containing protein
BaRT2v18chr1HG004580
BaRT2v18chr1HG004590
BaRT2v18chr1HG004600	Transcription factor bHLH62;BHLH domain-containing protein
BaRT2v18chr1HG004600	Transcription factor bHLH62;BHLH domain-containing protein
BaRT2v18chr1HG004600	Transcription factor bHLH62;BHLH domain-containing protein
BaRT2v18chr1HG004600	Transcription factor bHLH62;BHLH domain-containing protein
BaRT2v18chr1HG004600	Transcription factor bHLH62;BHLH domain-containing protein
BaRT2v18chr1HG004600	Transcription factor bHLH62;BHLH domain-containing protein
BaRT2v18chr1HG004600	Transcription factor bHLH62;BHLH domain-containing protein
BaRT2v18chr1HG004600	Transcription factor bHLH62;BHLH domain-containing protein
BaRT2v18chr1HG004600	Transcription factor bHLH62;BHLH domain-containing protein
BaRT2v18chr1HG004610
BaRT2v18chr1HG004610
BaRT2v18chr1HG004620
BaRT2v18chr1HG004630	AAI domain-containing protein;non-specific lipid-transfer protein-like protein At2g13820;Lipid transfer protein/Par allergen
BaRT2v18chr1HG004640	Anaphase-promoting complex subunit 6-like isoform X1;High affinity cationic amino acid transporter 1
BaRT2v18chr1HG004640
BaRT2v18chr1HG004640
BaRT2v18chr1HG004640
BaRT2v18chr1HG004640
BaRT2v18chr1HG004640
BaRT2v18chr1HG004640
BaRT2v18chr1HG004650
BaRT2v18chr1HG004660
BaRT2v18chr1HG004670
BaRT2v18chr1HG004680
BaRT2v18chr1HG004690
BaRT2v18chr1HG004700
BaRT2v18chr1HG004710	LRR receptor-like serine/threonine-protein kinase GSO1;Leucine-rich repeat receptor protein kinase EMS1
BaRT2v18chr1HG004720
BaRT2v18chr1HG004730
BaRT2v18chr1HG004730
BaRT2v18chr1HG004740
BaRT2v18chr1HG004740
BaRT2v18chr1HG004740
BaRT2v18chr1HG004750	Reverse transcriptase Ty1/copia-type domain-containing protein
BaRT2v18chr1HG004760
BaRT2v18chr1HG004770
BaRT2v18chr1HG004770
BaRT2v18chr1HG004770
BaRT2v18chr1HG004780
BaRT2v18chr1HG004790
BaRT2v18chr1HG004790	Nuclear pore complex protein
BaRT2v18chr1HG004790	Nuclear pore complex protein
BaRT2v18chr1HG004790	Nuclear pore complex protein
BaRT2v18chr1HG004790
BaRT2v18chr1HG004800
BaRT2v18chr1HG004810
BaRT2v18chr1HG004820	ABC transporter domain-containing protein
BaRT2v18chr1HG004830
BaRT2v18chr1HG004830
BaRT2v18chr1HG004830
BaRT2v18chr1HG004830
BaRT2v18chr1HG004830
BaRT2v18chr1HG004830
BaRT2v18chr1HG004830
BaRT2v18chr1HG004830
BaRT2v18chr1HG004830
BaRT2v18chr1HG004830
BaRT2v18chr1HG004830
BaRT2v18chr1HG004830
BaRT2v18chr1HG004830
BaRT2v18chr1HG004830
BaRT2v18chr1HG004830	Serine/arginine-rich splicing factor RS2Z32
BaRT2v18chr1HG004830
BaRT2v18chr1HG004830
BaRT2v18chr1HG004830
BaRT2v18chr1HG004830
BaRT2v18chr1HG004830
BaRT2v18chr1HG004830
BaRT2v18chr1HG004830
BaRT2v18chr1HG004830
BaRT2v18chr1HG004830	Serine/arginine-rich splicing factor RS2Z32
BaRT2v18chr1HG004830
BaRT2v18chr1HG004830	Serine/arginine-rich splicing factor RS2Z32
BaRT2v18chr1HG004840
BaRT2v18chr1HG004850	Protein phosphatase inhibitor 2;Phosphoprotein phosphatase inhibitors;IPP-2 domain-containing protein
BaRT2v18chr1HG004850	Protein phosphatase inhibitor 2;Phosphoprotein phosphatase inhibitors;IPP-2 domain-containing protein
BaRT2v18chr1HG004850	Protein phosphatase inhibitor 2;Phosphoprotein phosphatase inhibitors;IPP-2 domain-containing protein
BaRT2v18chr1HG004850	Protein phosphatase inhibitor 2;Phosphoprotein phosphatase inhibitors;IPP-2 domain-containing protein
BaRT2v18chr1HG004850	Protein phosphatase inhibitor 2;Phosphoprotein phosphatase inhibitors;IPP-2 domain-containing protein
BaRT2v18chr1HG004850	Protein phosphatase inhibitor 2;Phosphoprotein phosphatase inhibitors;IPP-2 domain-containing protein
BaRT2v18chr1HG004860
BaRT2v18chr1HG004860
BaRT2v18chr1HG004860
BaRT2v18chr1HG004860
BaRT2v18chr1HG004860
BaRT2v18chr1HG004860	Alcohol dehydrogenase
BaRT2v18chr1HG004860	Alcohol dehydrogenase
BaRT2v18chr1HG004860	Alcohol dehydrogenase
BaRT2v18chr1HG004860	GroES-like zinc-binding dehydrogenase family protein isoform 3;Alcohol dehydrogenase (Fragment)
BaRT2v18chr1HG004860
BaRT2v18chr1HG004860
BaRT2v18chr1HG004860
BaRT2v18chr1HG004860	Alcohol dehydrogenase
BaRT2v18chr1HG004860	Alcohol dehydrogenase
BaRT2v18chr1HG004870
BaRT2v18chr1HG004880	Aromatic-L-amino-acid decarboxylase;Aromatic-L-amino-acid decarboxylase-like
BaRT2v18chr1HG004890	Pentatricopeptide repeat-containing protein;Ribosomal protein L15;Tetratricopeptide repeat TPR-like superfamily protein
BaRT2v18chr1HG004890	Pentatricopeptide repeat-containing protein;Ribosomal protein L15;Tetratricopeptide repeat TPR-like superfamily protein
BaRT2v18chr1HG004900	Bidirectional sugar transporter SWEET
BaRT2v18chr1HG004900	Bidirectional sugar transporter SWEET
BaRT2v18chr1HG004900	Bidirectional sugar transporter SWEET
BaRT2v18chr1HG004900
BaRT2v18chr1HG004900
BaRT2v18chr1HG004910
BaRT2v18chr1HG004920
BaRT2v18chr1HG004920
BaRT2v18chr1HG004920
BaRT2v18chr1HG004930
BaRT2v18chr1HG004940
BaRT2v18chr1HG004940
BaRT2v18chr1HG004940
BaRT2v18chr1HG004950
BaRT2v18chr1HG004950
BaRT2v18chr1HG004950
BaRT2v18chr1HG004950
BaRT2v18chr1HG004950
BaRT2v18chr1HG004960	Neprosin domain-containing protein
BaRT2v18chr1HG004970	Neprosin domain-containing protein
BaRT2v18chr1HG004970
BaRT2v18chr1HG004980	Neprosin domain-containing protein
BaRT2v18chr1HG004990	WEB family protein, chloroplastic
BaRT2v18chr1HG004990	WEB family protein, chloroplastic
BaRT2v18chr1HG004990
BaRT2v18chr1HG004990	WEB family protein, chloroplastic
BaRT2v18chr1HG005000	NAB domain-containing protein
BaRT2v18chr1HG005010
BaRT2v18chr1HG005020	Putative membrane protein YjcL-like;Putative membrane protein YjcL;Bax inhibitor 1 (Fragment);Keratin-associated protein 5-4
BaRT2v18chr1HG005030
BaRT2v18chr1HG005030
BaRT2v18chr1HG005030
BaRT2v18chr1HG005030
BaRT2v18chr1HG005030
BaRT2v18chr1HG005030
BaRT2v18chr1HG005030
BaRT2v18chr1HG005030
BaRT2v18chr1HG005040	Glycine-rich protein A3;glycine-rich protein A3-like;Glycine/proline-rich family protein
BaRT2v18chr1HG005040	Glycine-rich protein A3;glycine-rich protein A3-like;Glycine and proline rich protein 1;Glycine/proline-rich family protein
BaRT2v18chr1HG005040
BaRT2v18chr1HG005040	Glycine-rich protein A3;glycine-rich protein A3-like;Glycine/proline-rich family protein
BaRT2v18chr1HG005040	Glycine-rich protein A3;glycine-rich protein A3-like;Glycine/proline-rich family protein
BaRT2v18chr1HG005040
BaRT2v18chr1HG005050
BaRT2v18chr1HG005050
BaRT2v18chr1HG005050	Glycine-rich protein A3;glycine-rich protein A3-like;Rhodopsin
BaRT2v18chr1HG005050	Glycine-rich protein A3;glycine-rich protein A3-like;Rhodopsin
BaRT2v18chr1HG005050
BaRT2v18chr1HG005050	Glycine-rich protein A3;glycine-rich protein A3-like;Rhodopsin
BaRT2v18chr1HG005060	Putative zinc finger, CCHC-type
BaRT2v18chr1HG005070	UPF0014 membrane protein STAR2;Protein ALUMINUM SENSITIVE 3
BaRT2v18chr1HG005070	UPF0014 membrane protein STAR2;Protein ALUMINUM SENSITIVE 3
BaRT2v18chr1HG005080
BaRT2v18chr1HG005080
BaRT2v18chr1HG005090	Homeobox domain-containing protein
BaRT2v18chr1HG005100
BaRT2v18chr1HG005110	GDSL esterase/lipase;Alpha-L-fucosidase 2
BaRT2v18chr1HG005110	GDSL esterase/lipase;Alpha-L-fucosidase 2
BaRT2v18chr1HG005120	Neprosin domain-containing protein
BaRT2v18chr1HG005130
BaRT2v18chr1HG005140	F-box/LRR-repeat protein 14;F-box domain-containing protein
BaRT2v18chr1HG005140	F-box/LRR-repeat protein 14;F-box domain-containing protein
BaRT2v18chr1HG005150
BaRT2v18chr1HG005160
BaRT2v18chr1HG005170	Sensitivity to red light reduced 1-B1;SRR1 domain-containing protein
BaRT2v18chr1HG005170	Sensitivity to red light reduced 1-B1;SRR1 domain-containing protein
BaRT2v18chr1HG005170	Sensitivity to red light reduced 1-B1;SRR1 domain-containing protein
BaRT2v18chr1HG005170	Sensitivity to red light reduced 1-B1;SRR1 domain-containing protein
BaRT2v18chr1HG005180
BaRT2v18chr1HG005190
BaRT2v18chr1HG005200
BaRT2v18chr1HG005200
BaRT2v18chr1HG005200	Kinesin-like protein KIN-5D;Kinesin-like protein KIN-5D isoform A;Kinesin motor domain-containing protein
BaRT2v18chr1HG005200
BaRT2v18chr1HG005210
BaRT2v18chr1HG005220
BaRT2v18chr1HG005220
BaRT2v18chr1HG005220	RNB domain-containing protein;Ribonuclease II, chloroplastic/mitochondrial;Replication factor A protein
BaRT2v18chr1HG005220
BaRT2v18chr1HG005220
BaRT2v18chr1HG005220	RNB domain-containing protein;Ribonuclease II, chloroplastic/mitochondrial;Replication factor A protein
BaRT2v18chr1HG005220
BaRT2v18chr1HG005220
BaRT2v18chr1HG005220
BaRT2v18chr1HG005220
BaRT2v18chr1HG005220	RNB domain-containing protein;Ribonuclease II, chloroplastic/mitochondrial;Replication factor A protein
BaRT2v18chr1HG005220
BaRT2v18chr1HG005230	ENTH domain-containing protein;COP1-interacting protein-related, putative isoform 1;Epsin domain
BaRT2v18chr1HG005230	ENTH domain-containing protein
BaRT2v18chr1HG005240
BaRT2v18chr1HG005250	Keratin-associated protein 10-6 isoform 1;Pre-mRNA-splicing factor cwc22 like;Beta-klotho
BaRT2v18chr1HG005250
BaRT2v18chr1HG005250
BaRT2v18chr1HG005250
BaRT2v18chr1HG005250	Keratin-associated protein 10-6 isoform 1;Pre-mRNA-splicing factor cwc22 like;Beta-klotho
BaRT2v18chr1HG005250
BaRT2v18chr1HG005250
BaRT2v18chr1HG005250
BaRT2v18chr1HG005260	thylakoid membrane protein TERC, chloroplastic isoform X1;Putative integral membrane protein TerC
BaRT2v18chr1HG005260
BaRT2v18chr1HG005260
BaRT2v18chr1HG005260	thylakoid membrane protein TERC, chloroplastic isoform X1;Putative integral membrane protein TerC
BaRT2v18chr1HG005260
BaRT2v18chr1HG005260
BaRT2v18chr1HG005260	thylakoid membrane protein TERC, chloroplastic;Integral membrane protein TerC
BaRT2v18chr1HG005260	thylakoid membrane protein TERC, chloroplastic;Putative integral membrane protein TerC
BaRT2v18chr1HG005260
BaRT2v18chr1HG005260
BaRT2v18chr1HG005260	thylakoid membrane protein TERC, chloroplastic;Putative integral membrane protein TerC
BaRT2v18chr1HG005260	thylakoid membrane protein TERC, chloroplastic isoform X1;Putative integral membrane protein TerC
BaRT2v18chr1HG005260	thylakoid membrane protein TERC, chloroplastic;Integral membrane protein TerC
BaRT2v18chr1HG005260
BaRT2v18chr1HG005270
BaRT2v18chr1HG005270
BaRT2v18chr1HG005270
BaRT2v18chr1HG005270	Transcription factor IIIA;Zinc finger X-linked protein ZXDA-like isoform X1;Lysine-specific demethylase REF6
BaRT2v18chr1HG005270
BaRT2v18chr1HG005270
BaRT2v18chr1HG005270
BaRT2v18chr1HG005270	Transcription factor IIIA;Zinc finger X-linked protein ZXDA-like isoform X1;Lysine-specific demethylase REF6
BaRT2v18chr1HG005270
BaRT2v18chr1HG005270
BaRT2v18chr1HG005270
BaRT2v18chr1HG005270
BaRT2v18chr1HG005270
BaRT2v18chr1HG005270
BaRT2v18chr1HG005270	Transcription factor IIIA;Zinc finger X-linked protein ZXDA-like isoform X1;Lysine-specific demethylase REF6
BaRT2v18chr1HG005270	Transcription factor IIIA;Zinc finger X-linked protein ZXDA-like isoform X1;Lysine-specific demethylase REF6
BaRT2v18chr1HG005270
BaRT2v18chr1HG005270
BaRT2v18chr1HG005270
BaRT2v18chr1HG005270
BaRT2v18chr1HG005270
BaRT2v18chr1HG005280
BaRT2v18chr1HG005290	Glucan endo-1,3-beta-glucosidase 11;Putative beta-1,3-glucanase
BaRT2v18chr1HG005300
BaRT2v18chr1HG005310
BaRT2v18chr1HG005320
BaRT2v18chr1HG005320
BaRT2v18chr1HG005320
BaRT2v18chr1HG005320
BaRT2v18chr1HG005320
BaRT2v18chr1HG005320
BaRT2v18chr1HG005320
BaRT2v18chr1HG005330
BaRT2v18chr1HG005340
BaRT2v18chr1HG005350
BaRT2v18chr1HG005360
BaRT2v18chr1HG005370
BaRT2v18chr1HG005380
BaRT2v18chr1HG005380
BaRT2v18chr1HG005390
BaRT2v18chr1HG005400
BaRT2v18chr1HG005400
BaRT2v18chr1HG005400
BaRT2v18chr1HG005410
BaRT2v18chr1HG005420
BaRT2v18chr1HG005420
BaRT2v18chr1HG005420
BaRT2v18chr1HG005420
BaRT2v18chr1HG005430
BaRT2v18chr1HG005430
BaRT2v18chr1HG005440
BaRT2v18chr1HG005450
BaRT2v18chr1HG005450
BaRT2v18chr1HG005460
BaRT2v18chr1HG005470
BaRT2v18chr1HG005470	F-box protein SKIP1;Putative SKP1 interacting partner 1;Leucine-rich repeat, cysteine-containing subtype;Leucine-rich repeat
BaRT2v18chr1HG005470	F-box protein SKIP1;Putative SKP1 interacting partner 1;Leucine-rich repeat, cysteine-containing subtype
BaRT2v18chr1HG005480
BaRT2v18chr1HG005480	Uridine nucleosidase 1;Inosine/uridine-preferring nucleoside hydrolase
BaRT2v18chr1HG005480	Uridine nucleosidase 1;Inosine/uridine-preferring nucleoside hydrolase
BaRT2v18chr1HG005480
BaRT2v18chr1HG005480	Uridine nucleosidase 1;Inosine-uridine preferring nucleoside hydrolase
BaRT2v18chr1HG005480
BaRT2v18chr1HG005480	Uridine nucleosidase 1;Inosine/uridine-preferring nucleoside hydrolase
BaRT2v18chr1HG005490
BaRT2v18chr1HG005490
BaRT2v18chr1HG005500
BaRT2v18chr1HG005510	Adenylate isopentenyltransferase 5, chloroplastic
BaRT2v18chr1HG005520
BaRT2v18chr1HG005520
BaRT2v18chr1HG005520
BaRT2v18chr1HG005520
BaRT2v18chr1HG005520
BaRT2v18chr1HG005530	Glutamyl-tRNA reductase
BaRT2v18chr1HG005530	Glutamyl-tRNA reductase
BaRT2v18chr1HG005530	Glutamyl-tRNA reductase
BaRT2v18chr1HG005530	Glutamyl-tRNA reductase
BaRT2v18chr1HG005530	Glutamyl-tRNA reductase
BaRT2v18chr1HG005530	Glutamyl-tRNA reductase
BaRT2v18chr1HG005530	Glutamyl-tRNA reductase
BaRT2v18chr1HG005530
BaRT2v18chr1HG005530
BaRT2v18chr1HG005530
BaRT2v18chr1HG005530
BaRT2v18chr1HG005530	Glutamyl-tRNA reductase
BaRT2v18chr1HG005540
BaRT2v18chr1HG005540
BaRT2v18chr1HG005540
BaRT2v18chr1HG005540	Long-chain-alcohol oxidase
BaRT2v18chr1HG005540
BaRT2v18chr1HG005540
BaRT2v18chr1HG005540
BaRT2v18chr1HG005550	F-box domain-containing protein
BaRT2v18chr1HG005550	F-box domain-containing protein
BaRT2v18chr1HG005550	F-box domain-containing protein
BaRT2v18chr1HG005550	F-box domain-containing protein
BaRT2v18chr1HG005550	F-box domain-containing protein
BaRT2v18chr1HG005560	Remorin, C-terminal region family protein, expressed;Remorin
BaRT2v18chr1HG005560	Remorin
BaRT2v18chr1HG005560	Remorin
BaRT2v18chr1HG005560	Remorin, C-terminal region family protein, expressed;Remorin
BaRT2v18chr1HG005570
BaRT2v18chr1HG005570
BaRT2v18chr1HG005570
BaRT2v18chr1HG005570
BaRT2v18chr1HG005570
BaRT2v18chr1HG005570
BaRT2v18chr1HG005570
BaRT2v18chr1HG005570
BaRT2v18chr1HG005570
BaRT2v18chr1HG005570
BaRT2v18chr1HG005580	Disease resistance protein RPM1
BaRT2v18chr1HG005590
BaRT2v18chr1HG005590
BaRT2v18chr1HG005600
BaRT2v18chr1HG005610
BaRT2v18chr1HG005610	Ethylene-responsive transcription factor RAP2-7;AP2/ERF domain-containing protein
BaRT2v18chr1HG005610	Ethylene-responsive transcription factor RAP2-7;AP2/ERF domain-containing protein
BaRT2v18chr1HG005610
BaRT2v18chr1HG005610
BaRT2v18chr1HG005610
BaRT2v18chr1HG005610
BaRT2v18chr1HG005610
BaRT2v18chr1HG005610	Ethylene-responsive transcription factor RAP2-7;Floral homeotic protein APETALA 2;AP2/ERF domain-containing protein
BaRT2v18chr1HG005610	Ethylene-responsive transcription factor RAP2-7;AP2/ERF domain-containing protein;floral homeotic protein APETALA 2-like isoform X1
BaRT2v18chr1HG005610
BaRT2v18chr1HG005610
BaRT2v18chr1HG005610
BaRT2v18chr1HG005610	Ethylene-responsive transcription factor RAP2-7;Floral homeotic protein APETALA 2;AP2/ERF domain-containing protein
BaRT2v18chr1HG005610	Ethylene-responsive transcription factor RAP2-7;AP2/ERF domain-containing protein
BaRT2v18chr1HG005610	Ethylene-responsive transcription factor RAP2-7;AP2/ERF domain-containing protein
BaRT2v18chr1HG005610
BaRT2v18chr1HG005610	Ethylene-responsive transcription factor RAP2-7;AP2/ERF domain-containing protein
BaRT2v18chr1HG005610
BaRT2v18chr1HG005610
BaRT2v18chr1HG005610
BaRT2v18chr1HG005610	Ethylene-responsive transcription factor RAP2-7;AP2/ERF domain-containing protein;floral homeotic protein APETALA 2-like isoform X1
BaRT2v18chr1HG005610	Ethylene-responsive transcription factor RAP2-7;AP2/ERF domain-containing protein;floral homeotic protein APETALA 2-like isoform X1
BaRT2v18chr1HG005610	Ethylene-responsive transcription factor RAP2-7;AP2/ERF domain-containing protein
BaRT2v18chr1HG005610
BaRT2v18chr1HG005610
BaRT2v18chr1HG005610	Ethylene-responsive transcription factor RAP2-7;AP2/ERF domain-containing protein;floral homeotic protein APETALA 2-like isoform X1
BaRT2v18chr1HG005610
BaRT2v18chr1HG005610
BaRT2v18chr1HG005620
BaRT2v18chr1HG005620	DNA repair protein RAD51 homolog 2 isoform X1;Putative ATP diphosphatase
BaRT2v18chr1HG005620
BaRT2v18chr1HG005620	DNA repair protein RAD51 homolog 2 isoform X2
BaRT2v18chr1HG005620
BaRT2v18chr1HG005620
BaRT2v18chr1HG005620
BaRT2v18chr1HG005620
BaRT2v18chr1HG005620
BaRT2v18chr1HG005620
BaRT2v18chr1HG005630
BaRT2v18chr1HG005630
BaRT2v18chr1HG005630
BaRT2v18chr1HG005640	Putative sugar phosphate/phosphate translocator;TPT domain-containing protein;Triose-phosphate transporter domain-containing protein
BaRT2v18chr1HG005650	Lysine histidine transporter 1
BaRT2v18chr1HG005660
BaRT2v18chr1HG005670	Caffeic acid 3-O-methyltransferase;Tricetin 3',4',5'-O-trimethyltransferase;Flavone 3'-O-methyltransferase 1;O-methyltransferase 5;Flavonoid O-methyltransferase
BaRT2v18chr1HG005670	Tricetin 3',4',5'-O-trimethyltransferase;Caffeic acid 3-O-methyltransferase
BaRT2v18chr1HG005670-BaRT2v18chr1HG005680	Caffeic acid 3-O-methyltransferase;Tricetin 3',4',5'-O-trimethyltransferase;Flavone 3'-O-methyltransferase 1;O-methyltransferase 5;Flavonoid O-methyltransferase
BaRT2v18chr1HG005680	Caffeic acid 3-O-methyltransferase;Tricetin 3',4',5'-O-trimethyltransferase;Flavone 3'-O-methyltransferase 1;O-methyltransferase 5;Flavonoid O-methyltransferase
BaRT2v18chr1HG005690
BaRT2v18chr1HG005690
BaRT2v18chr1HG005700
BaRT2v18chr1HG005710
BaRT2v18chr1HG005710
BaRT2v18chr1HG005710
BaRT2v18chr1HG005720
BaRT2v18chr1HG005720
BaRT2v18chr1HG005720
BaRT2v18chr1HG005720
BaRT2v18chr1HG005730
BaRT2v18chr1HG005740
BaRT2v18chr1HG005740
BaRT2v18chr1HG005740
BaRT2v18chr1HG005740
BaRT2v18chr1HG005750	Patatin
BaRT2v18chr1HG005750	Patatin
BaRT2v18chr1HG005750	Patatin
BaRT2v18chr1HG005750	Patatin
BaRT2v18chr1HG005750
BaRT2v18chr1HG005750	Patatin
BaRT2v18chr1HG005760
BaRT2v18chr1HG005760
BaRT2v18chr1HG005760
BaRT2v18chr1HG005760
BaRT2v18chr1HG005760
BaRT2v18chr1HG005760
BaRT2v18chr1HG005760
BaRT2v18chr1HG005760	D-ribulose kinase isoform X1;Putative glycerol kinase;Xylulose kinase
BaRT2v18chr1HG005760	D-ribulose kinase isoform X1;Putative glycerol kinase;Xylulose kinase
BaRT2v18chr1HG005760	D-ribulose kinase isoform X1;Putative glycerol kinase;Xylulose kinase
BaRT2v18chr1HG005770
BaRT2v18chr1HG005770
BaRT2v18chr1HG005780
BaRT2v18chr1HG005790	Zinc finger, CCHC-type (Fragment)
BaRT2v18chr1HG005800
BaRT2v18chr1HG005810	Neprosin domain-containing protein
BaRT2v18chr1HG005820	E3 ubiquitin-protein ligase UPL4;HECT domain-containing protein
BaRT2v18chr1HG005820	E3 ubiquitin-protein ligase UPL4;HECT domain-containing protein
BaRT2v18chr1HG005830	PWWP domain-containing protein
BaRT2v18chr1HG005840
BaRT2v18chr1HG005840
BaRT2v18chr1HG005850
BaRT2v18chr1HG005860	Protein SENSITIVE TO PROTON RHIZOTOXICITY 1;zinc finger protein STOP1 homolog;C2H2-type domain-containing protein
BaRT2v18chr1HG005870	GPI-anchor transamidase;Vacuolar-processing enzyme alpha-isozyme
BaRT2v18chr1HG005870
BaRT2v18chr1HG005870
BaRT2v18chr1HG005870	Vacuolar-processing enzyme alpha-isozyme;GPI-anchor transamidase
BaRT2v18chr1HG005870
BaRT2v18chr1HG005880
BaRT2v18chr1HG005890
BaRT2v18chr1HG005900	Interactor of constitutive active ROPs 2, chloroplastic;Ribosome biogenesis regulatory protein-like protein;Myosin heavy chain-related family protein
BaRT2v18chr1HG005900	Interactor of constitutive active ROPs 2, chloroplastic;Ribosome biogenesis regulatory protein-like protein;Myosin heavy chain-related family protein
BaRT2v18chr1HG005910	Ribosome biogenesis regulatory protein
BaRT2v18chr1HG005910	Ribosome biogenesis regulatory protein
BaRT2v18chr1HG005910	Ribosome biogenesis regulatory protein
BaRT2v18chr1HG005910	Ribosome biogenesis regulatory protein
BaRT2v18chr1HG005910	Ribosome biogenesis regulatory protein
BaRT2v18chr1HG005910	Ribosome biogenesis regulatory protein
BaRT2v18chr1HG005920
BaRT2v18chr1HG005930
BaRT2v18chr1HG005940
BaRT2v18chr1HG005950
BaRT2v18chr1HG005960
BaRT2v18chr1HG005960
BaRT2v18chr1HG005970	Glycosyltransferase;UDP-glycosyltransferase 86A1
BaRT2v18chr1HG005970	Glycosyltransferase;UDP-glycosyltransferase 86A1
BaRT2v18chr1HG005970
BaRT2v18chr1HG005980
BaRT2v18chr1HG005990
BaRT2v18chr1HG006000
BaRT2v18chr1HG006010	Tetraspanin3;Tetraspanin/Peripherin
BaRT2v18chr1HG006010
BaRT2v18chr1HG006010	Tetraspanin-3;FeS cluster assembly protein sufB
BaRT2v18chr1HG006010
BaRT2v18chr1HG006020
BaRT2v18chr1HG006030
BaRT2v18chr1HG006040
BaRT2v18chr1HG006050
BaRT2v18chr1HG006060
BaRT2v18chr1HG006060
BaRT2v18chr1HG006060
BaRT2v18chr1HG006060	ACPS domain-containing protein;4-phosphopantetheinyl transferase sfp
BaRT2v18chr1HG006060	ACPS domain-containing protein;4-phosphopantetheinyl transferase sfp
BaRT2v18chr1HG006060
BaRT2v18chr1HG006060	ACPS domain-containing protein;4-phosphopantetheinyl transferase sfp
BaRT2v18chr1HG006060	ACPS domain-containing protein
BaRT2v18chr1HG006060
BaRT2v18chr1HG006060
BaRT2v18chr1HG006060
BaRT2v18chr1HG006060	ACPS domain-containing protein;4-phosphopantetheinyl transferase sfp
BaRT2v18chr1HG006060
BaRT2v18chr1HG006060
BaRT2v18chr1HG006060
BaRT2v18chr1HG006060
BaRT2v18chr1HG006060	ACPS domain-containing protein;4-phosphopantetheinyl transferase sfp
BaRT2v18chr1HG006070
BaRT2v18chr1HG006080
BaRT2v18chr1HG006080	AAI domain-containing protein;Endosperm transfer cell specific PR60
BaRT2v18chr1HG006090
BaRT2v18chr1HG006100
BaRT2v18chr1HG006100	AAI domain-containing protein;Endosperm transfer cell specific PR60
BaRT2v18chr1HG006110	Putative zinc finger, CCHC-type;Retrotransposon protein
BaRT2v18chr1HG006120
BaRT2v18chr1HG006130
BaRT2v18chr1HG006130
BaRT2v18chr1HG006140	AAI domain-containing protein;Endosperm transfer cell specific PR60
BaRT2v18chr1HG006150
BaRT2v18chr1HG006160
BaRT2v18chr1HG006160	Endosperm transfer cell specific PR60;AAI domain-containing protein
BaRT2v18chr1HG006170
BaRT2v18chr1HG006180	Endosperm transfer cell specific PR60;AAI domain-containing protein
BaRT2v18chr1HG006180
BaRT2v18chr1HG006190
BaRT2v18chr1HG006190
BaRT2v18chr1HG006200
BaRT2v18chr1HG006210	AAI domain-containing protein;Endosperm transfer cell specific PR60
BaRT2v18chr1HG006220
BaRT2v18chr1HG006220
BaRT2v18chr1HG006220
BaRT2v18chr1HG006220
BaRT2v18chr1HG006220
BaRT2v18chr1HG006230
BaRT2v18chr1HG006230	DNL-type domain-containing protein;DNL-type zinc finger protein;Putative mitochondrial import protein TIM15;Mitochondrial protein import protein ZIM17
BaRT2v18chr1HG006230	DNL-type domain-containing protein;DNL-type zinc finger;Mitochondrial import protein TIM
BaRT2v18chr1HG006230	DNL-type domain-containing protein;Mitochondrial import protein TIM;DNL-type zinc finger
BaRT2v18chr1HG006230
BaRT2v18chr1HG006240
BaRT2v18chr1HG006250
BaRT2v18chr1HG006250
BaRT2v18chr1HG006260	UBC core domain-containing protein;Ubiquitin conjugating enzyme-like
BaRT2v18chr1HG006260
BaRT2v18chr1HG006260	UBC core domain-containing protein;Ubiquitin conjugating enzyme-like
BaRT2v18chr1HG006260	UBC core domain-containing protein;Ubiquitin conjugating enzyme-like;Ubiquitin-conjugating enzyme family protein
BaRT2v18chr1HG006260	UBC core domain-containing protein;Ubiquitin conjugating enzyme-like
BaRT2v18chr1HG006270
BaRT2v18chr1HG006280
BaRT2v18chr1HG006290
BaRT2v18chr1HG006300	Disease resistance protein RPM1;AAA domain-containing protein
BaRT2v18chr1HG006300	Disease resistance protein RPM1;AAA domain-containing protein
BaRT2v18chr1HG006310	Putative membrane localized peptidase;Putative glutamate carboxypeptidase 2;PA domain-containing protein
BaRT2v18chr1HG006310	Putative membrane localized peptidase;Putative glutamate carboxypeptidase 2;PA domain-containing protein
BaRT2v18chr1HG006320
BaRT2v18chr1HG006330	Glycosyltransferases
BaRT2v18chr1HG006330	Glycosyltransferases
BaRT2v18chr1HG006330	Glycosyltransferases
BaRT2v18chr1HG006330	Glycosyltransferases
BaRT2v18chr1HG006340
BaRT2v18chr1HG006350	IQ-domain 3;IQ motif
BaRT2v18chr1HG006350	IQ-domain 3;IQ motif;Calmodulin binding protein;DUF4005 domain-containing protein (Fragment)
BaRT2v18chr1HG006350	IQ-domain 3;IQ motif
BaRT2v18chr1HG006350	IQ-domain 3;IQ motif
BaRT2v18chr1HG006350
BaRT2v18chr1HG006350
BaRT2v18chr1HG006350
BaRT2v18chr1HG006350	IQ-domain 3;IQ motif
BaRT2v18chr1HG006350	IQ-domain 3;IQ motif
BaRT2v18chr1HG006360
BaRT2v18chr1HG006370
BaRT2v18chr1HG006380
BaRT2v18chr1HG006390
BaRT2v18chr1HG006400
BaRT2v18chr1HG006400
BaRT2v18chr1HG006400
BaRT2v18chr1HG006400
BaRT2v18chr1HG006400
BaRT2v18chr1HG006400
BaRT2v18chr1HG006400
BaRT2v18chr1HG006400
BaRT2v18chr1HG006410
BaRT2v18chr1HG006410
BaRT2v18chr1HG006410
BaRT2v18chr1HG006410
BaRT2v18chr1HG006410
BaRT2v18chr1HG006410
BaRT2v18chr1HG006410
BaRT2v18chr1HG006410
BaRT2v18chr1HG006420
BaRT2v18chr1HG006430
BaRT2v18chr1HG006430
BaRT2v18chr1HG006430
BaRT2v18chr1HG006430
BaRT2v18chr1HG006440
BaRT2v18chr1HG006450
BaRT2v18chr1HG006460	Sugar transport protein 5;MFS domain-containing protein
BaRT2v18chr1HG006460
BaRT2v18chr1HG006470
BaRT2v18chr1HG006470
BaRT2v18chr1HG006470
BaRT2v18chr1HG006480
BaRT2v18chr1HG006480	Transducin family protein / WD-40 repeat family protein
BaRT2v18chr1HG006480
BaRT2v18chr1HG006480	Transducin family protein / WD-40 repeat family protein
BaRT2v18chr1HG006480	Transducin family protein / WD-40 repeat family protein
BaRT2v18chr1HG006480	Transducin family protein / WD-40 repeat family protein
BaRT2v18chr1HG006480
BaRT2v18chr1HG006480	Transducin family protein / WD-40 repeat family protein
BaRT2v18chr1HG006480	Transducin family protein / WD-40 repeat family protein
BaRT2v18chr1HG006480	Transducin family protein / WD-40 repeat family protein
BaRT2v18chr1HG006490
BaRT2v18chr1HG006500
BaRT2v18chr1HG006500
BaRT2v18chr1HG006500
BaRT2v18chr1HG006510	Polygalacturonase
BaRT2v18chr1HG006520	Importin N-terminal domain-containing protein
BaRT2v18chr1HG006520	Importin N-terminal domain-containing protein
BaRT2v18chr1HG006530	E3 SUMO-protein ligase SIZ1;SP-RING-type domain-containing protein
BaRT2v18chr1HG006530
BaRT2v18chr1HG006530	E3 SUMO-protein ligase SIZ1;SP-RING-type domain-containing protein
BaRT2v18chr1HG006530	E3 SUMO-protein ligase SIZ1;SP-RING-type domain-containing protein
BaRT2v18chr1HG006530	E3 SUMO-protein ligase SIZ1;SP-RING-type domain-containing protein
BaRT2v18chr1HG006530	E3 SUMO-protein ligase SIZ1;SP-RING-type domain-containing protein
BaRT2v18chr1HG006530	SAP domain-containing protein;E3 SUMO-protein ligase SIZ1
BaRT2v18chr1HG006530
BaRT2v18chr1HG006530	E3 SUMO-protein ligase SIZ1;SP-RING-type domain-containing protein
BaRT2v18chr1HG006530	E3 SUMO-protein ligase SIZ1;SP-RING-type domain-containing protein
BaRT2v18chr1HG006530
BaRT2v18chr1HG006530	E3 SUMO-protein ligase SIZ1;SP-RING-type domain-containing protein
BaRT2v18chr1HG006530
BaRT2v18chr1HG006530	E3 SUMO-protein ligase SIZ1;SP-RING-type domain-containing protein
BaRT2v18chr1HG006530	E3 SUMO-protein ligase SIZ1;SP-RING-type domain-containing protein
BaRT2v18chr1HG006530	E3 SUMO-protein ligase SIZ1;SP-RING-type domain-containing protein
BaRT2v18chr1HG006530	E3 SUMO-protein ligase SIZ1;SP-RING-type domain-containing protein
BaRT2v18chr1HG006530	SP-RING-type domain-containing protein;E3 SUMO-protein ligase SIZ1
BaRT2v18chr1HG006540
BaRT2v18chr1HG006550
BaRT2v18chr1HG006560
BaRT2v18chr1HG006570
BaRT2v18chr1HG006580	Triticin;12S seed storage globulin 1
BaRT2v18chr1HG006580	Triticin;12S seed storage globulin 1
BaRT2v18chr1HG006580	Triticin;12S seed storage globulin 1;Cupin type-1 domain-containing protein
BaRT2v18chr1HG006580
BaRT2v18chr1HG006580
BaRT2v18chr1HG006580
BaRT2v18chr1HG006590
BaRT2v18chr1HG006600
[truncated: 146,262 more rows]

## Sheet: UniProt
UniProt ID and Description
Name	Full_Name	Description
A0SPJ8	NAM1_HORVV	NAC transcription factor NAM-1
A0SPJ9	NAM2_HORVV	NAC transcription factor NAM-2
F2D276	CSPL2_HORVV	CASP-like protein 4B2
F2E2E4	CSPL3_HORVV	CASP-like protein 4B1
F2E5T1	CSPL1_HORVV	CASP-like protein 4B3
F2EL82	CSPL4_HORVV	CASP-like protein 3A1
M0Y4P1	UGT13_HORVV	UDP-glucosyltransferase UGT13248
O23979	IPYR_HORVV	Soluble inorganic pyrophosphatase
P82953	LECH_HORVV	Horcolin
Q4QXS7	IF4E1_HORVV	Eukaryotic translation initiation factor 4E-1
Q76LM0	MATK_HORVV	Maturase K
Q96565	AMNMT_HORVV	3-aminomethylindole N-methyltransferase
A0A023IN89	A0A023IN89_HORVV	CBF12
A0A023INA6	A0A023INA6_HORVV	CBF6B
A0A023IND4	A0A023IND4_HORVV	CBF2C
A0A0D5CPA7	A0A0D5CPA7_HORVV	Putative cellulose synthase-like protein D2
A0A0K1RJM9	A0A0K1RJM9_HORVV	BTR1-like protein
A0A0K1RJT0	A0A0K1RJT0_HORVV	BTR1
A0A0K1RKH1	A0A0K1RKH1_HORVV	BTR2-like protein
A0A0P0CK29	A0A0P0CK29_HORVV	Leucine rich repeat malectin kinase 1
A0A0X9V2N7	A0A0X9V2N7_HORVV	NAD(P)H-quinone oxidoreductase subunit H, chloroplastic
A0A142EGW9	A0A142EGW9_HORVV	Haemolysin-III-like protein
A0A191TDI2	A0A191TDI2_HORVV	ATP synthase protein MI25
A0A191TDI3	A0A191TDI3_HORVV	ATP synthase subunit alpha
A0A191TDK9	A0A191TDK9_HORVV	Ribosomal protein S13
A0A1C9ZP13	A0A1C9ZP13_HORVV	Ribosomal protein S1
A0A1C9ZVX1	A0A1C9ZVX1_HORVV	Ribosomal protein large subunit 5
A0A1C9ZW10	A0A1C9ZW10_HORVV	NADH-ubiquinone oxidoreductase chain 3
A0A1X9RSG6	A0A1X9RSG6_HORVV	BHLH
A0A287DTW3	A0A287DTW3_HORVV	Uncharacterized protein
A0A287DVF5	A0A287DVF5_HORVV	Transmembrane protein 64
A0A287DYI0	A0A287DYI0_HORVV	Expansin-like CBD domain-containing protein
A0A287DZ68	A0A287DZ68_HORVV	Transmembrane protein
A0A287DZZ7	A0A287DZZ7_HORVV	AAA_11 domain-containing protein
A0A287E072	A0A287E072_HORVV	Protein argonaute 16
A0A287E1M2	A0A287E1M2_HORVV	Uncharacterized protein
A0A287E1P6	A0A287E1P6_HORVV	Uncharacterized protein
A0A287E626	A0A287E626_HORVV	DEAD-box ATP-dependent RNA helicase 42
A0A287E8P7	A0A287E8P7_HORVV	DUF295 domain-containing protein
A0A287E9Z2	A0A287E9Z2_HORVV	Uncharacterized protein
A0A287EA61	A0A287EA61_HORVV	Uncharacterized protein
A0A287EA85	A0A287EA85_HORVV	AAI domain-containing protein
A0A287EAW6	A0A287EAW6_HORVV	Uncharacterized protein
A0A287EBT3	A0A287EBT3_HORVV	AAI domain-containing protein
A0A287EBU9	A0A287EBU9_HORVV	Oxidored_q6 domain-containing protein
A0A287EBZ8	A0A287EBZ8_HORVV	NAD(P)H dehydrogenase subunit H
A0A287EC76	A0A287EC76_HORVV	Cellulose synthase
A0A287EDF3	A0A287EDF3_HORVV	Protein DETOXIFICATION
A0A287EEL0	A0A287EEL0_HORVV	Uncharacterized protein
A0A287EEL4	A0A287EEL4_HORVV	Uncharacterized protein
A0A287EEV2	A0A287EEV2_HORVV	Dot/Icm secretion system substrate
A0A287EF53	A0A287EF53_HORVV	Disease resistance protein RGA3
A0A287EF97	A0A287EF97_HORVV	Pm3
A0A287EFM2	A0A287EFM2_HORVV	Disease resistance protein RPM1
A0A287EFV0	A0A287EFV0_HORVV	Uncharacterized protein
A0A287EGN3	A0A287EGN3_HORVV	Disease resistance protein RPM1
A0A287EGN7	A0A287EGN7_HORVV	Uncharacterized protein
A0A287EGN9	A0A287EGN9_HORVV	RPW8 domain-containing protein
A0A287EH26	A0A287EH26_HORVV	NB-ARC domain-containing protein
A0A287EH46	A0A287EH46_HORVV	Pib variant protein
A0A287EH47	A0A287EH47_HORVV	N-acetyltransferase domain-containing protein
A0A287EHU9	A0A287EHU9_HORVV	RGH1
A0A287EHV9	A0A287EHV9_HORVV	General transcription and DNA repair factor IIH subunit TFB5
A0A287EIB0	A0A287EIB0_HORVV	Purple acid phosphatase
A0A287EIT5	A0A287EIT5_HORVV	Uncharacterized protein
A0A287EJ20	A0A287EJ20_HORVV	Protein kinase domain-containing protein
A0A287EJT2	A0A287EJT2_HORVV	CSC1-like protein
A0A287EKE9	A0A287EKE9_HORVV	Uncharacterized protein
A0A287EKU6	A0A287EKU6_HORVV	Protein FON2 SPARE1
A0A287EKX2	A0A287EKX2_HORVV	Expressed conserved protein
A0A287ELA3	A0A287ELA3_HORVV	Uncharacterized protein
A0A287ELC1	A0A287ELC1_HORVV	Uncharacterized protein
A0A287ELD5	A0A287ELD5_HORVV	Disease resistance RPP13-like protein 1
A0A287EM65	A0A287EM65_HORVV	Pentatricopeptide repeat-containing protein
A0A287EMD8	A0A287EMD8_HORVV	Protein Rf1, mitochondrial
A0A287EMR6	A0A287EMR6_HORVV	Uncharacterized protein
A0A287EMU9	A0A287EMU9_HORVV	Protein kinase domain-containing protein
A0A287EN23	A0A287EN23_HORVV	TaAP2-A
A0A287EPM7	A0A287EPM7_HORVV	Arabinanase/levansucrase/invertase
A0A287EQ73	A0A287EQ73_HORVV	Calmodulin-interacting protein 111
A0A287EQC0	A0A287EQC0_HORVV	Metal tolerance protein 1-like
A0A287ERU7	A0A287ERU7_HORVV	Chromatin structure-remodeling complex protein BSH
A0A287ESB0	A0A287ESB0_HORVV	DUF1685 family protein
A0A287ESQ2	A0A287ESQ2_HORVV	Alanine transaminase
A0A287ET46	A0A287ET46_HORVV	WD_REPEATS_REGION domain-containing protein
A0A287ETR7	A0A287ETR7_HORVV	Uncharacterized protein
A0A287EUP1	A0A287EUP1_HORVV	Peroxidase
A0A287EUQ6	A0A287EUQ6_HORVV	Uncharacterized protein
A0A287EV61	A0A287EV61_HORVV	ATP-dependent DNA helicase
A0A287EVW5	A0A287EVW5_HORVV	Gamma-tubulin complex component
A0A287EY23	A0A287EY23_HORVV	Aspartate--tRNA ligase
A0A287EYF4	A0A287EYF4_HORVV	Uncharacterized protein
A0A287EYG6	A0A287EYG6_HORVV	Transmembrane protein
A0A287EYY1	A0A287EYY1_HORVV	Auxin-responsive protein
A0A287EZG4	A0A287EZG4_HORVV	Leucine rich repeat protein
A0A287EZQ9	A0A287EZQ9_HORVV	Heat shock 70 kDa protein 14
A0A287EZS0	A0A287EZS0_HORVV	FACT complex subunit SSRP1
A0A287EZV5	A0A287EZV5_HORVV	Non-specific serine/threonine protein kinase
A0A287F096	A0A287F096_HORVV	Malic enzyme
A0A287F134	A0A287F134_HORVV	Uncharacterized protein
A0A287F185	A0A287F185_HORVV	Myb-related protein 3R-1-like
A0A287F1N0	A0A287F1N0_HORVV	Uncharacterized protein
A0A287F3A8	A0A287F3A8_HORVV	RAB6-interacting golgin
A0A287F3M1	A0A287F3M1_HORVV	MOB kinase activator-like 1A
A0A287F413	A0A287F413_HORVV	Uncharacterized protein
A0A287F5B8	A0A287F5B8_HORVV	Phosphoglycerate kinase
A0A287F5G5	A0A287F5G5_HORVV	Uncharacterized protein
A0A287F5J5	A0A287F5J5_HORVV	Uncharacterized protein
A0A287F5V6	A0A287F5V6_HORVV	Ribosomal protein L5
A0A287F5X1	A0A287F5X1_HORVV	Ribosomal protein L5
A0A287F7M1	A0A287F7M1_HORVV	Uncharacterized protein
A0A287F7U4	A0A287F7U4_HORVV	Uncharacterized protein
A0A287F8M8	A0A287F8M8_HORVV	UDP-glucose:glycoprotein glucosyltransferase
A0A287F8R5	A0A287F8R5_HORVV	Phosphoribosylformylglycinamidine synthase
A0A287F8U5	A0A287F8U5_HORVV	Long-chain-alcohol oxidase
A0A287F928	A0A287F928_HORVV	Non-specific serine/threonine protein kinase
A0A287F9M6	A0A287F9M6_HORVV	zf-GRF domain-containing protein
A0A287FA43	A0A287FA43_HORVV	Peptidase M20
A0A287FAH9	A0A287FAH9_HORVV	Cytokinin dehydrogenase
A0A287FAM9	A0A287FAM9_HORVV	Chalcone synthase
A0A287FAR4	A0A287FAR4_HORVV	Thioredoxin domain-containing protein
A0A287FCB1	A0A287FCB1_HORVV	Uncharacterized protein
A0A287FD82	A0A287FD82_HORVV	Protein NEOXANTHIN-DEFICIENT 1
A0A287FDW1	A0A287FDW1_HORVV	Benzyl alcohol O-benzoyltransferase
A0A287FED8	A0A287FED8_HORVV	Uncharacterized protein
A0A287FEZ5	A0A287FEZ5_HORVV	Myb-like domain-containing protein
A0A287FF44	A0A287FF44_HORVV	Kinesin motor domain-containing protein
A0A287FFP0	A0A287FFP0_HORVV	Methionine aminopeptidase
A0A287FFR2	A0A287FFR2_HORVV	Uncharacterized protein
A0A287FGY7	A0A287FGY7_HORVV	Uncharacterized protein
A0A287FHD6	A0A287FHD6_HORVV	Non-lysosomal glucosylceramidase
A0A287FHY3	A0A287FHY3_HORVV	ECH_2 domain-containing protein
A0A287FI70	A0A287FI70_HORVV	Mitochondrial carnitine/acylcarnitine carrier-like protein
A0A287FIS5	A0A287FIS5_HORVV	Uncharacterized protein
A0A287FJA0	A0A287FJA0_HORVV	Protein kinase domain-containing protein
A0A287FJB4	A0A287FJB4_HORVV	Protein kinase domain-containing protein
A0A287FJK5	A0A287FJK5_HORVV	RING-type E3 ubiquitin transferase
A0A287FK11	A0A287FK11_HORVV	Uncharacterized protein
A0A287FKZ5	A0A287FKZ5_HORVV	Uncharacterized protein
A0A287FLB7	A0A287FLB7_HORVV	Uncharacterized protein
A0A287FM91	A0A287FM91_HORVV	Uncharacterized protein
A0A287FMK1	A0A287FMK1_HORVV	Trehalose 6-phosphate phosphatase
A0A287FP91	A0A287FP91_HORVV	Uncharacterized protein
A0A287FQ05	A0A287FQ05_HORVV	Dual specificity protein phosphatase DSP8
A0A287FQY5	A0A287FQY5_HORVV	Protein LATERAL ROOT PRIMORDIUM 1
A0A287FRP8	A0A287FRP8_HORVV	rRNA N-glycosylase
A0A287FRW6	A0A287FRW6_HORVV	Threonine--tRNA ligase
A0A287FSE6	A0A287FSE6_HORVV	Uncharacterized protein
A0A287FTM1	A0A287FTM1_HORVV	Uncharacterized protein
A0A287FTU3	A0A287FTU3_HORVV	Protein FAM91A1
A0A287FV03	A0A287FV03_HORVV	WD_REPEATS_REGION domain-containing protein
A0A287FVJ7	A0A287FVJ7_HORVV	NB-ARC domain-containing protein
A0A287FW54	A0A287FW54_HORVV	Sulfotransferase
A0A287FWT1	A0A287FWT1_HORVV	Preprotein translocase subunit SCY2, chloroplastic
A0A287FX97	A0A287FX97_HORVV	PHD-type domain-containing protein
A0A287FY08	A0A287FY08_HORVV	Protein NRT1/ PTR FAMILY 3.1
A0A287FY40	A0A287FY40_HORVV	Uncharacterized protein
A0A287FYP4	A0A287FYP4_HORVV	GDSL esterase/lipase
A0A287FYX1	A0A287FYX1_HORVV	GRF-type domain-containing protein
A0A287FZ34	A0A287FZ34_HORVV	Guanosine nucleotide diphosphate dissociation inhibitor
A0A287FZ53	A0A287FZ53_HORVV	Thioredoxin-like fold domain-containing protein MRL7L, chloroplastic
A0A287FZE3	A0A287FZE3_HORVV	Beta-hexosaminidase
A0A287FZF2	A0A287FZF2_HORVV	NB-ARC domain-containing protein
A0A287G027	A0A287G027_HORVV	Uncharacterized protein
A0A287G0Y2	A0A287G0Y2_HORVV	Uncharacterized protein
A0A287G1C1	A0A287G1C1_HORVV	Phytocyanin domain-containing protein
A0A287G1J5	A0A287G1J5_HORVV	Potassium transporter
A0A287G1V9	A0A287G1V9_HORVV	Aurora kinase
A0A287G2J6	A0A287G2J6_HORVV	Transcription factor GAMYB
A0A287G327	A0A287G327_HORVV	Protein DETOXIFICATION
A0A287G3X7	A0A287G3X7_HORVV	Uncharacterized protein
A0A287G4I6	A0A287G4I6_HORVV	Zinc transporter 3
A0A287G4L1	A0A287G4L1_HORVV	RING-type E3 ubiquitin transferase
A0A287G5D2	A0A287G5D2_HORVV	CASP-like protein
A0A287G681	A0A287G681_HORVV	Membrane-bound NADPH oxidase
A0A287G6F9	A0A287G6F9_HORVV	DUF295 domain-containing protein
A0A287G6S0	A0A287G6S0_HORVV	Myb-related protein A
A0A287G7A9	A0A287G7A9_HORVV	Uncharacterized protein
A0A287G7F8	A0A287G7F8_HORVV	Uncharacterized protein
A0A287G7J6	A0A287G7J6_HORVV	Ubiquitinyl hydrolase 1
A0A287G8M3	A0A287G8M3_HORVV	Fructose-bisphosphatase
A0A287G8R2	A0A287G8R2_HORVV	Uncharacterized protein
A0A287G9P9	A0A287G9P9_HORVV	Disease resistance protein
A0A287GAK5	A0A287GAK5_HORVV	Nuclear pore complex protein NUP35
A0A287GAZ3	A0A287GAZ3_HORVV	Alpha,alpha-trehalose-phosphate synthase (UDP-forming)
A0A287GBJ6	A0A287GBJ6_HORVV	Calcium-transporting ATPase
A0A287GCI3	A0A287GCI3_HORVV	Uncharacterized protein
A0A287GD92	A0A287GD92_HORVV	Dihydrodipicolinate reductase
A0A287GE29	A0A287GE29_HORVV	Myb-related protein Hv33
A0A287GEN5	A0A287GEN5_HORVV	Uncharacterized protein
A0A287GF19	A0A287GF19_HORVV	Uncharacterized protein
A0A287GG80	A0A287GG80_HORVV	Uncharacterized protein
A0A287GGJ6	A0A287GGJ6_HORVV	Glycerophosphodiester phosphodiesterase
A0A287GGS7	A0A287GGS7_HORVV	Uncharacterized protein
A0A287GGT4	A0A287GGT4_HORVV	WD_REPEATS_REGION domain-containing protein
A0A287GH33	A0A287GH33_HORVV	Shikimate O-hydroxycinnamoyltransferase
A0A287GHP0	A0A287GHP0_HORVV	Uncharacterized protein
A0A287GIV3	A0A287GIV3_HORVV	Protein kinase domain-containing protein
A0A287GJJ0	A0A287GJJ0_HORVV	Jacalin-type lectin domain-containing protein
A0A287GK35	A0A287GK35_HORVV	1-deoxy-D-xylulose-5-phosphate synthase
A0A287GLI6	A0A287GLI6_HORVV	Protein kinase domain-containing protein
A0A287GME4	A0A287GME4_HORVV	Uncharacterized protein
A0A287GN13	A0A287GN13_HORVV	Uncharacterized protein
A0A287GN26	A0A287GN26_HORVV	Aspartic proteinase oryzasin-1
A0A287GN44	A0A287GN44_HORVV	Uncharacterized protein
A0A287GNC9	A0A287GNC9_HORVV	Rx_N domain-containing protein
A0A287GNX7	A0A287GNX7_HORVV	Uncharacterized protein
A0A287GQ58	A0A287GQ58_HORVV	Omp85 domain-containing protein
A0A287GR86	A0A287GR86_HORVV	Uncharacterized protein
A0A287GRI5	A0A287GRI5_HORVV	Glycosyltransferase
A0A287GS21	A0A287GS21_HORVV	NADH dehydrogenase [ubiquinone] 1 beta subcomplex subunit 9
A0A287GSU9	A0A287GSU9_HORVV	Ribonuclease 1
A0A287GTZ9	A0A287GTZ9_HORVV	Ion_trans domain-containing protein
A0A287GV06	A0A287GV06_HORVV	VWFA domain-containing protein
A0A287GVI3	A0A287GVI3_HORVV	BRCT domain-containing protein
A0A287GWA3	A0A287GWA3_HORVV	Uncharacterized protein
A0A287GWD4	A0A287GWD4_HORVV	VHS domain-containing protein
A0A287GWI7	A0A287GWI7_HORVV	Uncharacterized protein
A0A287GWL0	A0A287GWL0_HORVV	Uncharacterized protein
A0A287GWL8	A0A287GWL8_HORVV	Laccase
A0A287GX20	A0A287GX20_HORVV	Uncharacterized protein
A0A287GXB9	A0A287GXB9_HORVV	Uncharacterized protein
A0A287GXI4	A0A287GXI4_HORVV	NB-ARC domain-containing protein
A0A287GXM1	A0A287GXM1_HORVV	Uncharacterized protein
A0A287GY31	A0A287GY31_HORVV	Actin-related protein 9
A0A287GYA3	A0A287GYA3_HORVV	Terpene_synth domain-containing protein
A0A287GYB7	A0A287GYB7_HORVV	Nicotianamine synthase
A0A287GYL8	A0A287GYL8_HORVV	Glyoxylate reductase
A0A287GYU1	A0A287GYU1_HORVV	Adenylate kinase
A0A287GYZ2	A0A287GYZ2_HORVV	Uncharacterized protein
A0A287GZB4	A0A287GZB4_HORVV	NB-ARC domain-containing protein
A0A287GZJ0	A0A287GZJ0_HORVV	Uncharacterized protein
A0A287H098	A0A287H098_HORVV	P-loop containing nucleoside triphosphate hydrolase, leucine-rich repeat domain, L
A0A287H0C3	A0A287H0C3_HORVV	Disease resistance protein RPM1
A0A287H0P8	A0A287H0P8_HORVV	Receptor-like serine/threonine-protein kinase
A0A287H0V5	A0A287H0V5_HORVV	Receptor-like serine/threonine-protein kinase
A0A287H1G3	A0A287H1G3_HORVV	Uncharacterized protein
A0A287H207	A0A287H207_HORVV	Uncharacterized protein
A0A287H239	A0A287H239_HORVV	Ribulose bisphosphate carboxylase small subunit, chloroplastic
A0A287H2M6	A0A287H2M6_HORVV	PWWP domain-containing protein
A0A287H305	A0A287H305_HORVV	ULP_PROTEASE domain-containing protein
A0A287H4H0	A0A287H4H0_HORVV	Uncharacterized protein
A0A287H6D6	A0A287H6D6_HORVV	Uncharacterized protein
A0A287H6P9	A0A287H6P9_HORVV	Transcription factor TGA6
A0A287H7L0	A0A287H7L0_HORVV	Uncharacterized protein
A0A287H8S6	A0A287H8S6_HORVV	NB-ARC domain-containing protein
A0A287H9P0	A0A287H9P0_HORVV	Uncharacterized protein
A0A287H9W9	A0A287H9W9_HORVV	UDP-Glycosyltransferase superfamily protein
A0A287HAZ7	A0A287HAZ7_HORVV	Sex determination protein tasselseed-2
A0A287HBF7	A0A287HBF7_HORVV	Uncharacterized protein
A0A287HC47	A0A287HC47_HORVV	Phosphoribosylformylglycinamidine cyclo-ligase
A0A287HDU7	A0A287HDU7_HORVV	Protein SSUH2 homolog
A0A287HFZ0	A0A287HFZ0_HORVV	Flavin-containing monooxygenase
A0A287HGX5	A0A287HGX5_HORVV	Uncharacterized protein
A0A287HHI1	A0A287HHI1_HORVV	DExH-box ATP-dependent RNA helicase DExH10
A0A287HHP3	A0A287HHP3_HORVV	F-box domain-containing protein
A0A287HHQ2	A0A287HHQ2_HORVV	Uncharacterized protein
A0A287HHZ4	A0A287HHZ4_HORVV	AB hydrolase-1 domain-containing protein
A0A287HII4	A0A287HII4_HORVV	Uncharacterized protein
A0A287HJ26	A0A287HJ26_HORVV	Uncharacterized protein
A0A287HKI1	A0A287HKI1_HORVV	Non-specific serine/threonine protein kinase
A0A287HLW9	A0A287HLW9_HORVV	Probable 6-phosphogluconolactonase
A0A287HNZ4	A0A287HNZ4_HORVV	S-acyltransferase
A0A287HPN8	A0A287HPN8_HORVV	Proteasome subunit alpha type
A0A287HR72	A0A287HR72_HORVV	Phenylalanine ammonia-lyase
A0A287HRR9	A0A287HRR9_HORVV	Uncharacterized protein
A0A287HRU9	A0A287HRU9_HORVV	Uncharacterized protein
A0A287HSA1	A0A287HSA1_HORVV	Protein-serine/threonine phosphatase
A0A287HSU7	A0A287HSU7_HORVV	Phospholipid-transporting ATPase
A0A287HSY1	A0A287HSY1_HORVV	Elongator complex protein 1
A0A287HV15	A0A287HV15_HORVV	Uncharacterized protein
A0A287HVD7	A0A287HVD7_HORVV	Tyrosyl-DNA phosphodiesterase 1
A0A287HVG2	A0A287HVG2_HORVV	Cysteine-rich receptor-like protein kinase 25
A0A287HVV0	A0A287HVV0_HORVV	Yae1_N domain-containing protein
A0A287HVW3	A0A287HVW3_HORVV	Uncharacterized protein
A0A287HYS6	A0A287HYS6_HORVV	Uncharacterized protein
A0A287I003	A0A287I003_HORVV	Uncharacterized protein
A0A287I0Z5	A0A287I0Z5_HORVV	DNA_mis_repair domain-containing protein
A0A287I154	A0A287I154_HORVV	PHD-type domain-containing protein
A0A287I2U0	A0A287I2U0_HORVV	Uncharacterized protein
A0A287I383	A0A287I383_HORVV	ANK_REP_REGION domain-containing protein
A0A287I4I9	A0A287I4I9_HORVV	(S)-2-hydroxy-acid oxidase
A0A287I647	A0A287I647_HORVV	Uncharacterized protein
A0A287I6U4	A0A287I6U4_HORVV	Glutamyl-tRNA(Gln) amidotransferase subunit B, chloroplastic/mitochondrial
A0A287I7H1	A0A287I7H1_HORVV	VARLMGL domain-containing protein
A0A287I7H4	A0A287I7H4_HORVV	Uncharacterized protein
A0A287IB10	A0A287IB10_HORVV	YozE_SAM_like domain-containing protein
A0A287IB24	A0A287IB24_HORVV	Peroxisomal membrane protein PEX16
A0A287ICW2	A0A287ICW2_HORVV	Peroxisomal fatty acid beta-oxidation multifunctional protein MFP2
A0A287IFA8	A0A287IFA8_HORVV	Uncharacterized protein
A0A287IH25	A0A287IH25_HORVV	Uncharacterized protein
A0A287IHH1	A0A287IHH1_HORVV	Protein EI24 homolog
A0A287IJ17	A0A287IJ17_HORVV	Uncharacterized protein
A0A287IJ38	A0A287IJ38_HORVV	MADS-box transcription factor
A0A287IJV1	A0A287IJV1_HORVV	PGG domain-containing protein
A0A287IK43	A0A287IK43_HORVV	Glutamate decarboxylase
A0A287ILG2	A0A287ILG2_HORVV	Aldose 1-epimerase
A0A287ILJ5	A0A287ILJ5_HORVV	Uncharacterized protein
A0A287ILN0	A0A287ILN0_HORVV	Uncharacterized protein
A0A287IQW6	A0A287IQW6_HORVV	Non-specific serine/threonine protein kinase
A0A287ISD6	A0A287ISD6_HORVV	DNA-3-methyladenine glycosylase I
A0A287ISK4	A0A287ISK4_HORVV	Uncharacterized protein
A0A287ITM3	A0A287ITM3_HORVV	NB-ARC domain-containing protein
A0A287IUF4	A0A287IUF4_HORVV	Protein kinase domain-containing protein
A0A287IUL3	A0A287IUL3_HORVV	Uncharacterized protein
A0A287IVK8	A0A287IVK8_HORVV	Phenylalanine ammonia-lyase
A0A287IVR5	A0A287IVR5_HORVV	Uncharacterized protein
A0A287IW03	A0A287IW03_HORVV	SANT domain-containing protein
A0A287IX56	A0A287IX56_HORVV	Uncharacterized protein
A0A287IYL2	A0A287IYL2_HORVV	Uncharacterized protein
A0A287IYY7	A0A287IYY7_HORVV	Uncharacterized protein
A0A287J1F3	A0A287J1F3_HORVV	O-fucosyltransferase family protein
A0A287J1P2	A0A287J1P2_HORVV	DUF3741 domain-containing protein
A0A287J2G9	A0A287J2G9_HORVV	Uncharacterized protein
A0A287J334	A0A287J334_HORVV	AA_kinase domain-containing protein
A0A287J3K2	A0A287J3K2_HORVV	Uncharacterized protein
A0A287J3T3	A0A287J3T3_HORVV	Uncharacterized protein
A0A287J5E6	A0A287J5E6_HORVV	Terpene_synth_C domain-containing protein
A0A287J5K1	A0A287J5K1_HORVV	Cold-responsive protein WCOR15-2A
A0A287J692	A0A287J692_HORVV	Ubiquitin-specific protease
A0A287J912	A0A287J912_HORVV	ABC transporter C family member 2-like
A0A287JBQ2	A0A287JBQ2_HORVV	TPR_REGION domain-containing protein
A0A287JCA6	A0A287JCA6_HORVV	B3 domain-containing protein
A0A287JCC2	A0A287JCC2_HORVV	AAA domain-containing protein
A0A287JCM8	A0A287JCM8_HORVV	Uncharacterized protein
A0A287JCS5	A0A287JCS5_HORVV	Protein transport protein Sec61 subunit gamma
A0A287JCV9	A0A287JCV9_HORVV	SET domain-containing protein
A0A287JDD8	A0A287JDD8_HORVV	Uncharacterized protein
A0A287JDJ8	A0A287JDJ8_HORVV	Uncharacterized protein
A0A287JDT0	A0A287JDT0_HORVV	Uncharacterized protein
A0A287JDU6	A0A287JDU6_HORVV	Uncharacterized protein
A0A287JE96	A0A287JE96_HORVV	Uncharacterized protein
A0A287JEP8	A0A287JEP8_HORVV	Protein RCC2
A0A287JF55	A0A287JF55_HORVV	Protein UXT homolog
A0A287JHQ2	A0A287JHQ2_HORVV	Filament-like plant protein 7
A0A287JIK6	A0A287JIK6_HORVV	Aromatic-L-amino-acid decarboxylase
A0A287JIK7	A0A287JIK7_HORVV	UPF0481 protein At3g47200-like
A0A287JKM1	A0A287JKM1_HORVV	Uncharacterized protein
A0A287JKX0	A0A287JKX0_HORVV	Homogentisate phytyltransferase 1, chloroplastic
A0A287JN69	A0A287JN69_HORVV	Uncharacterized protein
A0A287JPA2	A0A287JPA2_HORVV	Non-specific serine/threonine protein kinase
A0A287JPN5	A0A287JPN5_HORVV	Receptor-like serine/threonine-protein kinase
A0A287JR02	A0A287JR02_HORVV	Cysteine protease
A0A287JR75	A0A287JR75_HORVV	U4/U6.U5 tri-snRNP-associated protein 1
A0A287JRL6	A0A287JRL6_HORVV	Uncharacterized protein
A0A287JRR1	A0A287JRR1_HORVV	Uncharacterized protein
A0A287JSA9	A0A287JSA9_HORVV	Pre-mRNA cleavage factor Im 25 kDa subunit
A0A287JSG0	A0A287JSG0_HORVV	Uncharacterized protein
A0A287JU77	A0A287JU77_HORVV	Protein kinase domain-containing protein
A0A287JU83	A0A287JU83_HORVV	Aldehyde oxygenase (deformylating)
A0A287JU85	A0A287JU85_HORVV	Uncharacterized protein
A0A287JUN2	A0A287JUN2_HORVV	Purple acid phosphatase
A0A287JVY4	A0A287JVY4_HORVV	Peptidyl-prolyl cis-trans isomerase
A0A287JWE3	A0A287JWE3_HORVV	NB-ARC domain-containing protein
A0A287JWK1	A0A287JWK1_HORVV	Disease resistance protein
A0A287JWN2	A0A287JWN2_HORVV	FAS1 domain-containing protein
A0A287JWX3	A0A287JWX3_HORVV	AAA domain-containing protein
A0A287JXX4	A0A287JXX4_HORVV	CDP-diacylglycerol--serine O-phosphatidyltransferase
A0A287JYX6	A0A287JYX6_HORVV	AAA domain-containing protein
A0A287JYZ4	A0A287JYZ4_HORVV	Uncharacterized protein
A0A287JZA2	A0A287JZA2_HORVV	Uncharacterized protein
A0A287JZF2	A0A287JZF2_HORVV	Ribosomal protein L5
A0A287JZL7	A0A287JZL7_HORVV	Uncharacterized protein
A0A287JZN7	A0A287JZN7_HORVV	AA_permease domain-containing protein
A0A287JZS6	A0A287JZS6_HORVV	RING-type E3 ubiquitin transferase
A0A287K0N7	A0A287K0N7_HORVV	Protein FAM133-like
A0A287K0Z9	A0A287K0Z9_HORVV	Protein kinase domain-containing protein
A0A287K221	A0A287K221_HORVV	Glutamine amidotransferase type-1 domain-containing protein
A0A287K2B8	A0A287K2B8_HORVV	Uncharacterized protein
A0A287K2E9	A0A287K2E9_HORVV	Non-specific lipid-transfer protein
A0A287K383	A0A287K383_HORVV	Uncharacterized protein
A0A287K3H9	A0A287K3H9_HORVV	Uncharacterized protein
A0A287K418	A0A287K418_HORVV	Non-specific serine/threonine protein kinase
A0A287K4A9	A0A287K4A9_HORVV	Uncharacterized protein
A0A287K4D3	A0A287K4D3_HORVV	tRNA-intron lyase
A0A287K4I6	A0A287K4I6_HORVV	NB-ARC domain disease resistance protein
A0A287K4I9	A0A287K4I9_HORVV	Disease resistance RPP13-like protein 1
A0A287K4L6	A0A287K4L6_HORVV	F-box/LRR-repeat protein 2
A0A287K4Q0	A0A287K4Q0_HORVV	Disease resistance protein RGA3
A0A287K517	A0A287K517_HORVV	E3 ubiquitin-protein ligase
A0A287K5N8	A0A287K5N8_HORVV	Very-long-chain (3R)-3-hydroxyacyl-CoA dehydratase
A0A287K5X8	A0A287K5X8_HORVV	Asparagine synthetase [glutamine-hydrolyzing]
A0A287K6X5	A0A287K6X5_HORVV	Disease resistance protein RPM1
A0A287K811	A0A287K811_HORVV	Uncharacterized protein
A0A287K8E8	A0A287K8E8_HORVV	Uncharacterized protein
A0A287K8S2	A0A287K8S2_HORVV	Late embryogenesis abundant protein, LEA-14
A0A287K990	A0A287K990_HORVV	Cellulose synthase-like protein G2
A0A287K9E0	A0A287K9E0_HORVV	PPR_long domain-containing protein
A0A287K9R3	A0A287K9R3_HORVV	Uncharacterized protein
A0A287KAV1	A0A287KAV1_HORVV	Uncharacterized protein
A0A287KB29	A0A287KB29_HORVV	Uncharacterized protein
A0A287KB39	A0A287KB39_HORVV	Uncharacterized protein
A0A287KBF4	A0A287KBF4_HORVV	Transcription factor IIIB 90 kDa subunit-like
A0A287KBS8	A0A287KBS8_HORVV	Uncharacterized protein
A0A287KDD4	A0A287KDD4_HORVV	Uncharacterized protein
A0A287KDF1	A0A287KDF1_HORVV	Uncharacterized protein
A0A287KDH8	A0A287KDH8_HORVV	Uncharacterized protein
A0A287KDZ0	A0A287KDZ0_HORVV	Protein LURP-one-related 15
A0A287KEB9	A0A287KEB9_HORVV	Uncharacterized protein
A0A287KIB4	A0A287KIB4_HORVV	Homeobox-leucine zipper protein HOX29
A0A287KKH0	A0A287KKH0_HORVV	Peptide-N4-(N-acetyl-beta- glucosaminyl)asparagine amidase A
A0A287KNC2	A0A287KNC2_HORVV	Uncharacterized protein
A0A287KNH8	A0A287KNH8_HORVV	Uncharacterized protein
A0A287KNI8	A0A287KNI8_HORVV	Reticulon-like protein
A0A287KP21	A0A287KP21_HORVV	Leucine--tRNA ligase
A0A287KPJ1	A0A287KPJ1_HORVV	ANK_REP_REGION domain-containing protein
A0A287KQ75	A0A287KQ75_HORVV	Uncharacterized protein
A0A287KQB5	A0A287KQB5_HORVV	Germin-like protein
A0A287KQJ0	A0A287KQJ0_HORVV	Uncharacterized protein
A0A287KQT4	A0A287KQT4_HORVV	Importin subunit alpha
A0A287KR62	A0A287KR62_HORVV	Uncharacterized protein
A0A287KRQ9	A0A287KRQ9_HORVV	Uncharacterized protein
A0A287KS29	A0A287KS29_HORVV	Uncharacterized protein
A0A287KUB8	A0A287KUB8_HORVV	Uncharacterized protein
A0A287KUR3	A0A287KUR3_HORVV	ATP citrate synthase
A0A287KWS2	A0A287KWS2_HORVV	Uncharacterized protein
A0A287KWY7	A0A287KWY7_HORVV	Vacuolar protein sorting-associated protein 51 homolog
A0A287KXN1	A0A287KXN1_HORVV	Shikimate dehydrogenase (NADP(+))
A0A287KY97	A0A287KY97_HORVV	Xpo1 domain-containing protein
A0A287KZI2	A0A287KZI2_HORVV	Ubiquitin carboxyl-terminal hydrolase
A0A287KZR6	A0A287KZR6_HORVV	IQ domain-containing protein IQM4
A0A287KZV7	A0A287KZV7_HORVV	Developmentally-regulated G-protein 2
A0A287L0H0	A0A287L0H0_HORVV	Lycopene epsilon cyclase, chloroplastic
A0A287L2G3	A0A287L2G3_HORVV	WD_REPEATS_REGION domain-containing protein
A0A287L2N6	A0A287L2N6_HORVV	LisH domain-containing protein
A0A287L3J7	A0A287L3J7_HORVV	N-alpha-acetyltransferase 16, NatA auxiliary subunit
A0A287L592	A0A287L592_HORVV	Aspartic proteinase oryzasin-1
A0A287L5I7	A0A287L5I7_HORVV	Carbonic anhydrase
A0A287L5N5	A0A287L5N5_HORVV	Uncharacterized protein
A0A287L620	A0A287L620_HORVV	Auxin efflux carrier component
A0A287L772	A0A287L772_HORVV	GDSL esterase/lipase
A0A287L8A3	A0A287L8A3_HORVV	NAB domain-containing protein
A0A287L8C4	A0A287L8C4_HORVV	Vacuolar protein sorting-associated protein 25
A0A287L8F9	A0A287L8F9_HORVV	Uncharacterized protein
A0A287L8P8	A0A287L8P8_HORVV	Uncharacterized protein
A0A287L9C4	A0A287L9C4_HORVV	Uncharacterized protein
A0A287L9R3	A0A287L9R3_HORVV	Carrier domain-containing protein
A0A287LCI4	A0A287LCI4_HORVV	Non-specific serine/threonine protein kinase
A0A287LF81	A0A287LF81_HORVV	Chloride channel protein
A0A287LGA7	A0A287LGA7_HORVV	KRR1 small subunit processome component
A0A287LI50	A0A287LI50_HORVV	CASP-like protein
A0A287LIE7	A0A287LIE7_HORVV	Uncharacterized protein
A0A287LIK0	A0A287LIK0_HORVV	Uncharacterized protein
A0A287LJS0	A0A287LJS0_HORVV	Uncharacterized protein
A0A287LLA5	A0A287LLA5_HORVV	Uncharacterized protein
A0A287LLU8	A0A287LLU8_HORVV	1,3-beta-glucan synthase
A0A287LMG1	A0A287LMG1_HORVV	Os08g0138700 protein
A0A287LN41	A0A287LN41_HORVV	Uncharacterized protein
A0A287LNA3	A0A287LNA3_HORVV	Uncharacterized protein
A0A287LP59	A0A287LP59_HORVV	Glyco_trans_2-like domain-containing protein
A0A287LPB7	A0A287LPB7_HORVV	Tunicamycin induced 1
A0A287LPM1	A0A287LPM1_HORVV	Uncharacterized protein
A0A287LRC4	A0A287LRC4_HORVV	Insulin-degrading enzyme-like 1, peroxisomal
A0A287LRJ1	A0A287LRJ1_HORVV	Secretory carrier-associated membrane protein
A0A287LRJ4	A0A287LRJ4_HORVV	Expansin
A0A287LRQ1	A0A287LRQ1_HORVV	ANK_REP_REGION domain-containing protein
A0A287LS64	A0A287LS64_HORVV	Receptor-like serine/threonine-protein kinase
A0A287LTK4	A0A287LTK4_HORVV	Uncharacterized protein
A0A287LU06	A0A287LU06_HORVV	Uncharacterized protein
A0A287LU29	A0A287LU29_HORVV	Transcription factor HBP-1b(C1)
A0A287LUC7	A0A287LUC7_HORVV	U3 small nucleolar RNA-associated protein 11
A0A287LUP4	A0A287LUP4_HORVV	Transcription factor
A0A287LWD2	A0A287LWD2_HORVV	DYW_deaminase domain-containing protein
A0A287LWH7	A0A287LWH7_HORVV	UBC core domain-containing protein
A0A287LWV2	A0A287LWV2_HORVV	WD_REPEATS_REGION domain-containing protein
A0A287LX13	A0A287LX13_HORVV	Uncharacterized protein
A0A287LXT3	A0A287LXT3_HORVV	Longin domain-containing protein
A0A287LXX9	A0A287LXX9_HORVV	Glycine hydroxymethyltransferase
A0A287LXY1	A0A287LXY1_HORVV	Beta-galactosidase
A0A287LY95	A0A287LY95_HORVV	DUF668 domain-containing protein
A0A287LZ58	A0A287LZ58_HORVV	Magnesium transporter
A0A287M074	A0A287M074_HORVV	Uncharacterized protein
A0A287M2R6	A0A287M2R6_HORVV	Uncharacterized protein
A0A287M397	A0A287M397_HORVV	HSP20-like chaperones superfamily protein
A0A287M3L2	A0A287M3L2_HORVV	Uncharacterized protein
A0A287M3V0	A0A287M3V0_HORVV	Uncharacterized protein
A0A287M4J2	A0A287M4J2_HORVV	Uncharacterized protein
A0A287M4U9	A0A287M4U9_HORVV	Uncharacterized protein
A0A287M5P6	A0A287M5P6_HORVV	Structural maintenance of chromosomes protein
A0A287M690	A0A287M690_HORVV	RING-type E3 ubiquitin transferase
A0A287M7C0	A0A287M7C0_HORVV	DUF4005 domain-containing protein
A0A287M7M5	A0A287M7M5_HORVV	Uncharacterized protein
A0A287M8F0	A0A287M8F0_HORVV	Uncharacterized protein
A0A287M952	A0A287M952_HORVV	Transmembrane protein
A0A287M9N8	A0A287M9N8_HORVV	Sulfotransferase
A0A287MA64	A0A287MA64_HORVV	Uncharacterized protein
A0A287MB14	A0A287MB14_HORVV	Uncharacterized protein
A0A287MD37	A0A287MD37_HORVV	NB-ARC domain-containing protein
A0A287MDA7	A0A287MDA7_HORVV	Protein kinase domain-containing protein
A0A287MDZ2	A0A287MDZ2_HORVV	Uncharacterized protein
A0A287ME54	A0A287ME54_HORVV	Uncharacterized protein
A0A287MFX0	A0A287MFX0_HORVV	2-hydroxyacyl-CoA lyase
A0A287MG15	A0A287MG15_HORVV	Lectin_legB domain-containing protein
A0A287MGE5	A0A287MGE5_HORVV	Uncharacterized protein
A0A287MGN3	A0A287MGN3_HORVV	Uncharacterized protein
A0A287MH01	A0A287MH01_HORVV	Transmembrane protein 45B
A0A287MH23	A0A287MH23_HORVV	Uncharacterized protein
A0A287MH34	A0A287MH34_HORVV	Uncharacterized protein
A0A287MHI9	A0A287MHI9_HORVV	Hydroxyethylthiazole kinase
A0A287MHK0	A0A287MHK0_HORVV	Disease resistance protein RPP13
A0A287MHM9	A0A287MHM9_HORVV	Caffeine synthase
A0A287MHY1	A0A287MHY1_HORVV	Disease resistance protein RGA3
A0A287MHZ8	A0A287MHZ8_HORVV	Yae1_N domain-containing protein
A0A287MIX9	A0A287MIX9_HORVV	Disease resistance protein RPP13
A0A287MJ20	A0A287MJ20_HORVV	P-loop containing nucleoside triphosphate hydrolase, leucine-rich repeat domain, L
A0A287MJH1	A0A287MJH1_HORVV	Glucan endo-1,3-beta-glucosidase
A0A287MJI3	A0A287MJI3_HORVV	Glucan endo-1,3-beta-D-glucosidase
A0A287MJK3	A0A287MJK3_HORVV	B3 domain-containing protein
A0A287MK40	A0A287MK40_HORVV	RNA-binding (RRM/RBD/RNP motifs) family protein
A0A287MK68	A0A287MK68_HORVV	Uncharacterized protein
A0A287MK73	A0A287MK73_HORVV	Protein kinase domain-containing protein
A0A287MKA2	A0A287MKA2_HORVV	Uncharacterized protein
A0A287MKB2	A0A287MKB2_HORVV	Glucan endo-1,3-beta-glucosidase GV
A0A287MKR0	A0A287MKR0_HORVV	Alpha-1,3-mannosyl-glycoprotein 2-beta-N-acetylglucosaminyltransferase
A0A287ML71	A0A287ML71_HORVV	Glutathione transferase
A0A287MLN1	A0A287MLN1_HORVV	Uncharacterized protein
A0A287MLU2	A0A287MLU2_HORVV	Uncharacterized protein
A0A287MNZ0	A0A287MNZ0_HORVV	Lipid droplet-associated hydrolase
A0A287MPL4	A0A287MPL4_HORVV	Splicing factor 3A subunit 1
A0A287MPN8	A0A287MPN8_HORVV	Uncharacterized protein
A0A287MPQ0	A0A287MPQ0_HORVV	Glucan endo-1,3-beta-glucosidase GV
A0A287MQ82	A0A287MQ82_HORVV	CASP-like protein
A0A287MQG7	A0A287MQG7_HORVV	Uncharacterized protein
A0A287MQV0	A0A287MQV0_HORVV	Jacalin-type lectin domain-containing protein
A0A287MR60	A0A287MR60_HORVV	Non-reducing end alpha-L-arabinofuranosidase
A0A287MRF1	A0A287MRF1_HORVV	Root cap
A0A287MRP6	A0A287MRP6_HORVV	Uncharacterized protein
A0A287MT33	A0A287MT33_HORVV	Uncharacterized protein
A0A287MT62	A0A287MT62_HORVV	Uncharacterized protein
A0A287MTI4	A0A287MTI4_HORVV	Very-long-chain (3R)-3-hydroxyacyl-CoA dehydratase
A0A287MTY3	A0A287MTY3_HORVV	Inorganic diphosphatase
A0A287MTZ7	A0A287MTZ7_HORVV	Uncharacterized protein
A0A287MUG1	A0A287MUG1_HORVV	LXG domain-containing protein
A0A287MUJ2	A0A287MUJ2_HORVV	Uncharacterized protein
A0A287MVS8	A0A287MVS8_HORVV	Disease resistance protein RGA3
A0A287MW69	A0A287MW69_HORVV	Uncharacterized protein
A0A287MW84	A0A287MW84_HORVV	ACT domain-containing protein ACR
A0A287MW99	A0A287MW99_HORVV	Protein UPSTREAM OF FLC
A0A287MWZ8	A0A287MWZ8_HORVV	Uncharacterized protein
A0A287MYD0	A0A287MYD0_HORVV	Uncharacterized protein
A0A287MYL4	A0A287MYL4_HORVV	Homeobox protein knotted-1-like 10
A0A287N003	A0A287N003_HORVV	Peptide transporter
A0A287N0G2	A0A287N0G2_HORVV	Arrestin_N domain-containing protein
A0A287N1I0	A0A287N1I0_HORVV	Uncharacterized protein
A0A287N2M2	A0A287N2M2_HORVV	RuvB-like helicase
A0A287N488	A0A287N488_HORVV	Transcription factor MYB44
A0A287N4R2	A0A287N4R2_HORVV	Uncharacterized protein
A0A287N5B9	A0A287N5B9_HORVV	Homeobox protein knotted-1-like 1
A0A287N5R0	A0A287N5R0_HORVV	Growth-regulating factor
A0A287N786	A0A287N786_HORVV	Uncharacterized protein
A0A287N832	A0A287N832_HORVV	HNOB domain-containing protein
A0A287N8E6	A0A287N8E6_HORVV	Uncharacterized protein
A0A287N8H8	A0A287N8H8_HORVV	B3 domain-containing protein
A0A287N9U8	A0A287N9U8_HORVV	PAZ domain-containing protein
A0A287NB21	A0A287NB21_HORVV	ER membrane protein complex subunit 10
A0A287NBA2	A0A287NBA2_HORVV	B3 domain-containing protein
A0A287NCM1	A0A287NCM1_HORVV	Leucine rich repeat protein
A0A287ND00	A0A287ND00_HORVV	Uncharacterized protein
A0A287NF05	A0A287NF05_HORVV	MLO-like protein
A0A287NFI1	A0A287NFI1_HORVV	Dirigent protein
A0A287NG23	A0A287NG23_HORVV	FRIGIDA-like protein
A0A287NH71	A0A287NH71_HORVV	Uncharacterized protein
A0A287NHB3	A0A287NHB3_HORVV	Coiled-coil domain-containing protein 79
A0A287NI07	A0A287NI07_HORVV	Cyclin-T1-5-like
A0A287NI28	A0A287NI28_HORVV	XH/XS domain-containing protein
A0A287NJ04	A0A287NJ04_HORVV	Uncharacterized protein
A0A287NKJ2	A0A287NKJ2_HORVV	Uncharacterized protein
A0A287NLT1	A0A287NLT1_HORVV	Glutamine--fructose-6-phosphate transaminase (isomerizing)
A0A287NLV3	A0A287NLV3_HORVV	Uncharacterized protein
A0A287NMD4	A0A287NMD4_HORVV	Non-specific serine/threonine protein kinase
A0A287NML1	A0A287NML1_HORVV	Uncharacterized protein
A0A287NN83	A0A287NN83_HORVV	GRAS domain-containing protein
A0A287NNJ9	A0A287NNJ9_HORVV	GRAS domain-containing protein
A0A287NNV8	A0A287NNV8_HORVV	Transcription factor MYB2
A0A287NPP0	A0A287NPP0_HORVV	Mannose-6-phosphate isomerase
A0A287NQU3	A0A287NQU3_HORVV	Peptidyl-prolyl cis-trans isomerase
A0A287NRK2	A0A287NRK2_HORVV	ANK_REP_REGION domain-containing protein
A0A287NRW6	A0A287NRW6_HORVV	DNA-directed RNA polymerase I subunit rpa49
A0A287NS50	A0A287NS50_HORVV	RING-type domain-containing protein
A0A287NTR2	A0A287NTR2_HORVV	Phosphoglycerate mutase family protein
A0A287NTR6	A0A287NTR6_HORVV	TPX2 domain-containing protein
A0A287NU34	A0A287NU34_HORVV	RING-type domain-containing protein
A0A287NU71	A0A287NU71_HORVV	Uncharacterized protein
A0A287NUX8	A0A287NUX8_HORVV	Histidine-rich glycoprotein-like
A0A287NV65	A0A287NV65_HORVV	Uncharacterized protein
A0A287NV79	A0A287NV79_HORVV	Retinoblastoma-related protein-like
A0A287NWG3	A0A287NWG3_HORVV	DYW_deaminase domain-containing protein
A0A287NWK0	A0A287NWK0_HORVV	TOM1-like protein 2
A0A287NY26	A0A287NY26_HORVV	Uncharacterized protein
A0A287NZS5	A0A287NZS5_HORVV	EGF_CA domain-containing protein
A0A287P008	A0A287P008_HORVV	Uncharacterized protein
A0A287P0Q5	A0A287P0Q5_HORVV	Guanine nucleotide exchange factor SPIKE 1
A0A287P1J1	A0A287P1J1_HORVV	Non-specific serine/threonine protein kinase
A0A287P384	A0A287P384_HORVV	Nicotianamine synthase
A0A287P3Q8	A0A287P3Q8_HORVV	Uncharacterized protein
A0A287P3Z6	A0A287P3Z6_HORVV	Uncharacterized protein
A0A287P468	A0A287P468_HORVV	Uncharacterized protein
A0A287P759	A0A287P759_HORVV	acidPPc domain-containing protein
A0A287P7Q4	A0A287P7Q4_HORVV	Mannan endo-1,4-beta-mannosidase
A0A287PA19	A0A287PA19_HORVV	Uncharacterized protein
A0A287PA58	A0A287PA58_HORVV	Uncharacterized protein
A0A287PAD6	A0A287PAD6_HORVV	Uncharacterized protein
A0A287PAZ7	A0A287PAZ7_HORVV	Rho GTPase activation protein (RhoGAP) with PH domain
A0A287PBI9	A0A287PBI9_HORVV	Protein FAR1-RELATED SEQUENCE
A0A287PBM8	A0A287PBM8_HORVV	Uncharacterized protein
A0A287PBT6	A0A287PBT6_HORVV	Uncharacterized protein
A0A287PCE1	A0A287PCE1_HORVV	Uncharacterized protein
A0A287PD19	A0A287PD19_HORVV	Uncharacterized protein
A0A287PF66	A0A287PF66_HORVV	Uncharacterized protein
A0A287PF70	A0A287PF70_HORVV	Phosphomannomutase
A0A287PF79	A0A287PF79_HORVV	Two-component response regulator
A0A287PF84	A0A287PF84_HORVV	Trehalose 6-phosphate phosphatase
A0A287PFF4	A0A287PFF4_HORVV	Low molecular mass early light-inducible protein HV60, chloroplastic
A0A287PFR3	A0A287PFR3_HORVV	PUL domain-containing protein
A0A287PGC8	A0A287PGC8_HORVV	C2 domain-containing protein
A0A287PGH6	A0A287PGH6_HORVV	Uncharacterized protein
A0A287PGY2	A0A287PGY2_HORVV	Ninja-family protein
A0A287PHF3	A0A287PHF3_HORVV	Uncharacterized protein
A0A287PJ31	A0A287PJ31_HORVV	B3 domain-containing protein
A0A287PJK7	A0A287PJK7_HORVV	TPR_REGION domain-containing protein
A0A287PKD8	A0A287PKD8_HORVV	Ditrans,polycis-polyprenyl diphosphate synthase ((2E,6E)-farnesyldiphosphate specific)
A0A287PM98	A0A287PM98_HORVV	Uncharacterized protein
A0A287PMM0	A0A287PMM0_HORVV	Uncharacterized protein
A0A287PMY3	A0A287PMY3_HORVV	Uncharacterized protein
A0A287PN36	A0A287PN36_HORVV	ANK_REP_REGION domain-containing protein
A0A287PRG5	A0A287PRG5_HORVV	Agmatine coumaroyltransferase-2-like
A0A287PS01	A0A287PS01_HORVV	Uncharacterized protein
A0A287PSF3	A0A287PSF3_HORVV	MADS-box protein
A0A287PSI8	A0A287PSI8_HORVV	Uncharacterized protein
A0A287PSJ5	A0A287PSJ5_HORVV	Uncharacterized protein
A0A287PSL6	A0A287PSL6_HORVV	Uncharacterized protein
A0A287PTJ9	A0A287PTJ9_HORVV	Uncharacterized protein
A0A287PTU6	A0A287PTU6_HORVV	Uncharacterized protein
A0A287PU65	A0A287PU65_HORVV	Methyltransferase
A0A287PU79	A0A287PU79_HORVV	Uncharacterized protein
A0A287PUS1	A0A287PUS1_HORVV	Uncharacterized protein
A0A287PUV7	A0A287PUV7_HORVV	GRAS domain-containing protein
A0A287PVY6	A0A287PVY6_HORVV	Calcium-dependent protein kinase
A0A287PWC2	A0A287PWC2_HORVV	Non-specific serine/threonine protein kinase
A0A287PX04	A0A287PX04_HORVV	Uncharacterized protein
A0A287PXG4	A0A287PXG4_HORVV	Uncharacterized protein
A0A287PXT3	A0A287PXT3_HORVV	Uncharacterized protein
A0A287PY01	A0A287PY01_HORVV	Peroxidase
A0A287PY70	A0A287PY70_HORVV	Uncharacterized protein
A0A287PYF6	A0A287PYF6_HORVV	Uncharacterized protein
A0A287PYT5	A0A287PYT5_HORVV	Dicer-like protein 1
A0A287PZJ9	A0A287PZJ9_HORVV	Short-chain dehydrogenase TIC 32, chloroplastic
A0A287Q0R0	A0A287Q0R0_HORVV	Uncharacterized protein
A0A287Q147	A0A287Q147_HORVV	Expansin-B4
A0A287Q1B8	A0A287Q1B8_HORVV	Uncharacterized protein
A0A287Q1M7	A0A287Q1M7_HORVV	Uncharacterized protein
A0A287Q1R4	A0A287Q1R4_HORVV	Uncharacterized protein
A0A287Q261	A0A287Q261_HORVV	Uncharacterized protein
A0A287Q3W7	A0A287Q3W7_HORVV	Uncharacterized protein
A0A287Q446	A0A287Q446_HORVV	Homeobox-leucine zipper protein HOX10
A0A287Q5F5	A0A287Q5F5_HORVV	Non-specific serine/threonine protein kinase
A0A287Q5P7	A0A287Q5P7_HORVV	Low molecular mass early light-inducible protein HV60, chloroplastic
A0A287Q787	A0A287Q787_HORVV	Pheophorbide A oxygenase
A0A287Q7H6	A0A287Q7H6_HORVV	Uncharacterized protein
A0A287Q7L6	A0A287Q7L6_HORVV	Neutral ceramidase
A0A287Q7R8	A0A287Q7R8_HORVV	Uncharacterized protein
A0A287Q7U2	A0A287Q7U2_HORVV	Ras-related protein RABF2b
A0A287Q8D5	A0A287Q8D5_HORVV	Uncharacterized protein
A0A287Q8M7	A0A287Q8M7_HORVV	Cation/calcium exchanger 1-like
A0A287Q8X9	A0A287Q8X9_HORVV	GrpE protein homolog 2, mitochondrial
A0A287Q949	A0A287Q949_HORVV	Uncharacterized protein
A0A287Q953	A0A287Q953_HORVV	NB-ARC domain-containing protein
A0A287QA24	A0A287QA24_HORVV	Protein IQ-DOMAIN 1-like
A0A287QA47	A0A287QA47_HORVV	Uncharacterized protein
A0A287QA86	A0A287QA86_HORVV	Uncharacterized protein
A0A287QA87	A0A287QA87_HORVV	Uncharacterized protein
A0A287QAB3	A0A287QAB3_HORVV	HNHc domain-containing protein
A0A287QAH0	A0A287QAH0_HORVV	Eukaryotic translation initiation factor 3 subunit B
A0A287QAK1	A0A287QAK1_HORVV	Uncharacterized protein
A0A287QAQ1	A0A287QAQ1_HORVV	Epimerase domain-containing protein
A0A287QBC6	A0A287QBC6_HORVV	Mannosyltransferase
A0A287QBN5	A0A287QBN5_HORVV	Uncharacterized protein
A0A287QC01	A0A287QC01_HORVV	Uncharacterized protein
A0A287QCK8	A0A287QCK8_HORVV	RING-type E3 ubiquitin transferase
A0A287QCR9	A0A287QCR9_HORVV	Receptor-like protein kinase
A0A287QCX5	A0A287QCX5_HORVV	Non-specific serine/threonine protein kinase
A0A287QDB1	A0A287QDB1_HORVV	Protein kinase domain-containing protein
A0A287QDS8	A0A287QDS8_HORVV	Alpha-galactosidase
A0A287QE55	A0A287QE55_HORVV	TPR_REGION domain-containing protein
A0A287QFG0	A0A287QFG0_HORVV	GTP 3',8-cyclase
A0A287QGI2	A0A287QGI2_HORVV	tRNA(His) guanylyltransferase
A0A287QGJ3	A0A287QGJ3_HORVV	Uncharacterized protein
A0A287QGV8	A0A287QGV8_HORVV	Uncharacterized protein
A0A287QH69	A0A287QH69_HORVV	Uncharacterized protein
A0A287QHJ1	A0A287QHJ1_HORVV	Protein FAR1-RELATED SEQUENCE
A0A287QHJ8	A0A287QHJ8_HORVV	Molybdenum cofactor sulfurase
A0A287QI91	A0A287QI91_HORVV	Uncharacterized protein
A0A287QJB4	A0A287QJB4_HORVV	Polyubiquitin
A0A287QKG2	A0A287QKG2_HORVV	Uncharacterized protein
A0A287QL44	A0A287QL44_HORVV	Uncharacterized protein
A0A287QLF7	A0A287QLF7_HORVV	DUF3741 domain-containing protein
A0A287QLU2	A0A287QLU2_HORVV	N-acetyltransferase domain-containing protein
A0A287QNA1	A0A287QNA1_HORVV	Uncharacterized protein
A0A287QNY7	A0A287QNY7_HORVV	Uncharacterized protein
A0A287QRJ0	A0A287QRJ0_HORVV	Uncharacterized protein
A0A287QS52	A0A287QS52_HORVV	DNAJ protein JJJ1 homolog
A0A287QSQ6	A0A287QSQ6_HORVV	Uncharacterized protein
A0A287QST2	A0A287QST2_HORVV	Uncharacterized protein
A0A287QT07	A0A287QT07_HORVV	C2 NT-type domain-containing protein
A0A287QTK9	A0A287QTK9_HORVV	Uncharacterized protein
A0A287QTP8	A0A287QTP8_HORVV	HTH OST-type domain-containing protein
A0A287QTQ6	A0A287QTQ6_HORVV	Rubis-subs-bind domain-containing protein
A0A287QU09	A0A287QU09_HORVV	Ultraviolet-B receptor UVR8
A0A287QUD2	A0A287QUD2_HORVV	SDR family oxidoreductase
A0A287QW07	A0A287QW07_HORVV	Zinc finger CCCH domain-containing protein ZFN-like
A0A287QWC0	A0A287QWC0_HORVV	Phosphatidylinositol N-acetylglucosaminyltransferase
A0A287QXJ4	A0A287QXJ4_HORVV	Long-chain-fatty-acid--CoA ligase
A0A287QYD2	A0A287QYD2_HORVV	Uncharacterized protein
A0A287QYJ9	A0A287QYJ9_HORVV	Caffeine synthase 2
A0A287R0J1	A0A287R0J1_HORVV	Uncharacterized protein
A0A287R0P1	A0A287R0P1_HORVV	Glutamine--fructose-6-phosphate transaminase (isomerizing)
A0A287R0U8	A0A287R0U8_HORVV	Protein ENHANCED DOWNY MILDEW 2-like
A0A287R112	A0A287R112_HORVV	Protein DETOXIFICATION
A0A287R3K4	A0A287R3K4_HORVV	Uncharacterized protein
A0A287R443	A0A287R443_HORVV	DUF295 domain-containing protein
A0A287R5I0	A0A287R5I0_HORVV	Uncharacterized protein
A0A287R5P6	A0A287R5P6_HORVV	Uncharacterized protein
A0A287R626	A0A287R626_HORVV	Uncharacterized protein
A0A287R6L1	A0A287R6L1_HORVV	TPR_REGION domain-containing protein
A0A287R700	A0A287R700_HORVV	Uncharacterized protein
A0A287R7J7	A0A287R7J7_HORVV	ABC1 domain-containing protein
A0A287R7T6	A0A287R7T6_HORVV	Uncharacterized protein
A0A287R7V7	A0A287R7V7_HORVV	Uncharacterized protein
A0A287R7Z9	A0A287R7Z9_HORVV	Phosphoglycolate phosphatase
A0A287R8A5	A0A287R8A5_HORVV	GPI inositol-deacylase
A0A287R8K6	A0A287R8K6_HORVV	GFO_IDH_MocA domain-containing protein
A0A287R8V8	A0A287R8V8_HORVV	Outer envelope pore protein 16-3, chloroplastic/mitochondrial
A0A287R8Y8	A0A287R8Y8_HORVV	BZIP transcription factor family protein
A0A287R917	A0A287R917_HORVV	Tub domain-containing protein
A0A287R9D7	A0A287R9D7_HORVV	Ycf20-like protein
A0A287RAI9	A0A287RAI9_HORVV	Protein-serine/threonine phosphatase
A0A287RBD8	A0A287RBD8_HORVV	Uncharacterized protein
A0A287RBN4	A0A287RBN4_HORVV	Protein arginine N-methyltransferase 1
A0A287RBP6	A0A287RBP6_HORVV	3-ketoacyl-CoA synthase
A0A287RDP2	A0A287RDP2_HORVV	MATH domain-containing protein
A0A287RE04	A0A287RE04_HORVV	Uncharacterized protein
A0A287REW1	A0A287REW1_HORVV	Annexin
A0A287REY3	A0A287REY3_HORVV	Cleavage and polyadenylation specificity factor subunit 3-I
A0A287RFA0	A0A287RFA0_HORVV	Xyloglucan endotransglucosylase/hydrolase
A0A287RGI6	A0A287RGI6_HORVV	O-fucosyltransferase family protein
A0A287RHL3	A0A287RHL3_HORVV	PDZ_6 domain-containing protein
A0A287RHL6	A0A287RHL6_HORVV	PDZ_6 domain-containing protein
A0A287RHQ6	A0A287RHQ6_HORVV	GRAS domain-containing protein
A0A287RIW7	A0A287RIW7_HORVV	Folate-biopterin transporter 6
A0A287RJM6	A0A287RJM6_HORVV	Secreted protein
A0A287RKD5	A0A287RKD5_HORVV	Uncharacterized protein
A0A287RL08	A0A287RL08_HORVV	Uncharacterized protein
A0A287RL49	A0A287RL49_HORVV	Uncharacterized protein
A0A287RLD0	A0A287RLD0_HORVV	CPSF_A domain-containing protein
A0A287RME2	A0A287RME2_HORVV	Remorin_C domain-containing protein
A0A287RMR1	A0A287RMR1_HORVV	Uncharacterized protein
A0A287RMR2	A0A287RMR2_HORVV	Uncharacterized protein
A0A287RNA7	A0A287RNA7_HORVV	Patatin
A0A287RP39	A0A287RP39_HORVV	Uncharacterized protein
A0A287RPZ7	A0A287RPZ7_HORVV	Uncharacterized protein
A0A287RQ28	A0A287RQ28_HORVV	Suppressor protein SRP40-like
A0A287RRQ2	A0A287RRQ2_HORVV	Serine carboxypeptidase-like 18
A0A287RRV0	A0A287RRV0_HORVV	Uncharacterized protein
A0A287RTT3	A0A287RTT3_HORVV	Uncharacterized protein
A0A287RU51	A0A287RU51_HORVV	DNA topoisomerase
A0A287RU81	A0A287RU81_HORVV	Phosphotransferase
A0A287RU98	A0A287RU98_HORVV	Myb-like domain-containing protein
A0A287RUB7	A0A287RUB7_HORVV	Short-chain dehydrogenase TIC 32, chloroplastic-like
A0A287RUF7	A0A287RUF7_HORVV	LRR domain containing protein
A0A287RUQ6	A0A287RUQ6_HORVV	Uncharacterized protein
A0A287RV28	A0A287RV28_HORVV	L-ascorbate oxidase
A0A287RWG4	A0A287RWG4_HORVV	Core-2/I-branching beta-1,6-N-acetylglucosaminyltransferase family protein
A0A287RWS6	A0A287RWS6_HORVV	Uncharacterized protein
A0A287RX61	A0A287RX61_HORVV	Uncharacterized protein
A0A287RY03	A0A287RY03_HORVV	Agmatine coumaroyltransferase-2-like
A0A287RYM7	A0A287RYM7_HORVV	PGG domain-containing protein
A0A287RYR1	A0A287RYR1_HORVV	PHD-type domain-containing protein
A0A287RYX5	A0A287RYX5_HORVV	Alpha-L-fucosidase
A0A287S072	A0A287S072_HORVV	Uncharacterized protein
A0A287S141	A0A287S141_HORVV	Diacylglycerol O-acyltransferase
A0A287S2W4	A0A287S2W4_HORVV	Uncharacterized protein
A0A287S394	A0A287S394_HORVV	Jacalin-type lectin domain-containing protein
A0A287S3H5	A0A287S3H5_HORVV	F-box domain-containing protein
A0A287S3I9	A0A287S3I9_HORVV	Cwf15/Cwc15 cell cycle control protein
A0A287S431	A0A287S431_HORVV	Auxin-responsive protein SAUR36-like
A0A287S445	A0A287S445_HORVV	Protein PHLOEM PROTEIN 2-LIKE A10
A0A287S476	A0A287S476_HORVV	Auxin-responsive protein SAUR36
A0A287S4S3	A0A287S4S3_HORVV	U11/U12 small nuclear ribonucleoprotein 31 kDa protein
A0A287S609	A0A287S609_HORVV	PRLI-interacting factor A
A0A287S6A6	A0A287S6A6_HORVV	UBC core domain-containing protein
A0A287S6N5	A0A287S6N5_HORVV	Probable purine permease
A0A287S794	A0A287S794_HORVV	Uncharacterized protein
A0A287S7S7	A0A287S7S7_HORVV	Uncharacterized protein
A0A287S7V3	A0A287S7V3_HORVV	Potassium transporter
A0A287S8C1	A0A287S8C1_HORVV	Dehydrin 1
A0A287SAT7	A0A287SAT7_HORVV	Uncharacterized protein
A0A287SAW5	A0A287SAW5_HORVV	AAA domain-containing protein
A0A287SAY0	A0A287SAY0_HORVV	ALA-interacting subunit
A0A287SAY5	A0A287SAY5_HORVV	Chalcone synthase
A0A287SB70	A0A287SB70_HORVV	Protein transport protein SEC23
A0A287SBD1	A0A287SBD1_HORVV	Ubiquitin-like domain-containing protein
A0A287SBD8	A0A287SBD8_HORVV	Uncharacterized protein
A0A287SCG7	A0A287SCG7_HORVV	Beta-glucosidase BoGH3B-like
A0A287SCX5	A0A287SCX5_HORVV	Str_synth domain-containing protein
A0A287SDA2	A0A287SDA2_HORVV	Uncharacterized protein
A0A287SDM8	A0A287SDM8_HORVV	COBRA-like protein
A0A287SDS3	A0A287SDS3_HORVV	Uncharacterized protein
A0A287SEX9	A0A287SEX9_HORVV	Uncharacterized protein
A0A287SFV3	A0A287SFV3_HORVV	Molybdenum cofactor sulfurase
A0A287SFZ8	A0A287SFZ8_HORVV	Thioredoxin domain-containing protein
A0A287SGH9	A0A287SGH9_HORVV	Eukaryotic translation initiation factor 3 subunit C
A0A287SH05	A0A287SH05_HORVV	Protein NRT1/ PTR FAMILY 6.4
A0A287SH14	A0A287SH14_HORVV	Methyltransferase
A0A287SHC1	A0A287SHC1_HORVV	TOM1-like protein 2
A0A287SI66	A0A287SI66_HORVV	Vegetative cell wall protein gp1-like
A0A287SK30	A0A287SK30_HORVV	Probable purine permease
A0A287SK40	A0A287SK40_HORVV	Uncharacterized protein
A0A287SK51	A0A287SK51_HORVV	Protein kinase domain-containing protein
A0A287SK82	A0A287SK82_HORVV	Uncharacterized protein
A0A287SL97	A0A287SL97_HORVV	Ubiquitinyl hydrolase 1
A0A287SLC8	A0A287SLC8_HORVV	BI1-like protein
A0A287SLN5	A0A287SLN5_HORVV	Uncharacterized protein
A0A287SMN5	A0A287SMN5_HORVV	Uncharacterized protein
A0A287SMW6	A0A287SMW6_HORVV	Uncharacterized protein
A0A287SND4	A0A287SND4_HORVV	Uncharacterized protein
A0A287SNE2	A0A287SNE2_HORVV	Uncharacterized protein
A0A287SNJ7	A0A287SNJ7_HORVV	BTB/POZ and MATH domain-containing protein 3-like
A0A287SNR6	A0A287SNR6_HORVV	Uncharacterized protein
A0A287SPA7	A0A287SPA7_HORVV	Uncharacterized protein
A0A287SPI6	A0A287SPI6_HORVV	Uncharacterized protein
A0A287SPK5	A0A287SPK5_HORVV	RNA polymerase sigma factor
A0A287SPZ0	A0A287SPZ0_HORVV	Protein kinase domain-containing protein
A0A287SQ79	A0A287SQ79_HORVV	UEV domain-containing protein
A0A287SQW8	A0A287SQW8_HORVV	RING-type E3 ubiquitin transferase
A0A287SS06	A0A287SS06_HORVV	Uncharacterized protein
A0A287SS18	A0A287SS18_HORVV	Zinc knuckle (CcHc-type) family protein
A0A287SUC1	A0A287SUC1_HORVV	Uncharacterized protein
A0A287SUL6	A0A287SUL6_HORVV	Uncharacterized protein
A0A287SV31	A0A287SV31_HORVV	Uncharacterized protein
A0A287SVI0	A0A287SVI0_HORVV	NB-ARC domain-containing protein
A0A287SVX5	A0A287SVX5_HORVV	4-hydroxybenzoate polyprenyltransferase, mitochondrial
A0A287SWD7	A0A287SWD7_HORVV	Rab9 effector protein with kelch motifs
A0A287SWW6	A0A287SWW6_HORVV	Uncharacterized protein
A0A287SXI8	A0A287SXI8_HORVV	Uncharacterized protein
A0A287SZX9	A0A287SZX9_HORVV	Uncharacterized protein
A0A287T0S4	A0A287T0S4_HORVV	Ycf20-like protein
A0A287T189	A0A287T189_HORVV	Uncharacterized protein
A0A287T1X0	A0A287T1X0_HORVV	SnoaL-like domain-containing protein
A0A287T218	A0A287T218_HORVV	PX domain-containing protein
A0A287T2K5	A0A287T2K5_HORVV	GDSL esterase/lipase EXL3
A0A287T2V7	A0A287T2V7_HORVV	Uncharacterized protein
A0A287T3E6	A0A287T3E6_HORVV	Ripening-related protein 2
A0A287T3E9	A0A287T3E9_HORVV	Acidic protein
A0A287T3S8	A0A287T3S8_HORVV	WAT1-related protein
A0A287T3X0	A0A287T3X0_HORVV	Bee-milk protein
A0A287T4W1	A0A287T4W1_HORVV	Uncharacterized protein
A0A287T584	A0A287T584_HORVV	AAA domain-containing protein
A0A287T6A9	A0A287T6A9_HORVV	Uncharacterized protein
A0A287T748	A0A287T748_HORVV	PPR_long domain-containing protein
A0A287T753	A0A287T753_HORVV	Uncharacterized protein
A0A287T7M6	A0A287T7M6_HORVV	Transcription termination factor MTERF9, chloroplastic
A0A287T864	A0A287T864_HORVV	RRM domain-containing protein
A0A287T8A1	A0A287T8A1_HORVV	Histone H2A
A0A287T8G0	A0A287T8G0_HORVV	Uncharacterized protein
A0A287T8G6	A0A287T8G6_HORVV	NB-ARC domain-containing protein
A0A287T8X2	A0A287T8X2_HORVV	Catalase
A0A287T982	A0A287T982_HORVV	Acylaminoacyl-peptidase
A0A287TB04	A0A287TB04_HORVV	DUF192 domain-containing protein
A0A287TB53	A0A287TB53_HORVV	F-box domain-containing protein
A0A287TC73	A0A287TC73_HORVV	NAM-associated domain-containing protein
A0A287TCH8	A0A287TCH8_HORVV	Uncharacterized protein
A0A287TCQ7	A0A287TCQ7_HORVV	Anthranilate N-benzoyltransferase protein 1
A0A287TD77	A0A287TD77_HORVV	Diacylglycerol O-acyltransferase
A0A287TE89	A0A287TE89_HORVV	General transcription and DNA repair factor IIH subunit TFB4
A0A287TE90	A0A287TE90_HORVV	Pentatricopeptide repeat-containing protein
A0A287TEE3	A0A287TEE3_HORVV	Uncharacterized protein
A0A287TET7	A0A287TET7_HORVV	Reticulon domain-containing protein
A0A287TEU8	A0A287TEU8_HORVV	Arm_2 domain-containing protein
A0A287TFN9	A0A287TFN9_HORVV	Uncharacterized protein
A0A287TGT2	A0A287TGT2_HORVV	Pentatricopeptide repeat-containing protein
A0A287TH75	A0A287TH75_HORVV	Protein SPT2 homolog
A0A287TJS7	A0A287TJS7_HORVV	Uncharacterized protein
A0A287TK35	A0A287TK35_HORVV	Pathogenesis-related homeodomain protein
A0A287TK63	A0A287TK63_HORVV	Uncharacterized protein
A0A287TKV2	A0A287TKV2_HORVV	Uncharacterized protein
A0A287TN77	A0A287TN77_HORVV	DUF4704 domain-containing protein
A0A287TNC9	A0A287TNC9_HORVV	Uncharacterized protein
A0A287TNE7	A0A287TNE7_HORVV	Polyubiquitin
A0A287TNI3	A0A287TNI3_HORVV	Uncharacterized protein
A0A287TNI5	A0A287TNI5_HORVV	Transcription factor GAMYB
A0A287TP26	A0A287TP26_HORVV	Uncharacterized protein
A0A287TPS5	A0A287TPS5_HORVV	Autophagy-related protein 13
A0A287TPT8	A0A287TPT8_HORVV	Uncharacterized protein
A0A287TQ64	A0A287TQ64_HORVV	Jacalin-type lectin domain-containing protein
A0A287TR86	A0A287TR86_HORVV	Protein RRC1-like
A0A287TT71	A0A287TT71_HORVV	Uncharacterized protein
A0A287TTQ5	A0A287TTQ5_HORVV	SAM-dependent MTase DRM-type domain-containing protein
A0A287TTV1	A0A287TTV1_HORVV	Inositol-1-monophosphatase
A0A287TVG2	A0A287TVG2_HORVV	Ditrans,polycis-polyprenyl diphosphate synthase ((2E,6E)-farnesyldiphosphate specific)
A0A287TWK6	A0A287TWK6_HORVV	Protein FLX-like 2
A0A287TWP9	A0A287TWP9_HORVV	Subtilisin-like protease SBT3.9
A0A287TX42	A0A287TX42_HORVV	Kynurenine formamidase
A0A287TY42	A0A287TY42_HORVV	S1-like domain-containing protein
A0A287TYN5	A0A287TYN5_HORVV	Uncharacterized protein
A0A287TYP9	A0A287TYP9_HORVV	Uncharacterized protein
A0A287TYQ0	A0A287TYQ0_HORVV	DEAD-box ATP-dependent RNA helicase 41
A0A287TYQ9	A0A287TYQ9_HORVV	Uncharacterized protein
A0A287U0N2	A0A287U0N2_HORVV	Peroxisomal membrane protein PMP22
A0A287U1M0	A0A287U1M0_HORVV	NAD(P)H dehydrogenase subunit H
A0A287U1Y5	A0A287U1Y5_HORVV	GDSL esterase/lipase
A0A287U2E1	A0A287U2E1_HORVV	Uncharacterized protein
A0A287U2E2	A0A287U2E2_HORVV	Cyclic nucleotide-binding domain-containing protein
A0A287U3J5	A0A287U3J5_HORVV	Iso_dh domain-containing protein
A0A287U3U9	A0A287U3U9_HORVV	DEAD domain-containing protein
A0A287U409	A0A287U409_HORVV	Pentatricopeptide repeat-containing protein
A0A287U5M5	A0A287U5M5_HORVV	NAP1-related protein 2
A0A287U7A0	A0A287U7A0_HORVV	Actin-related protein 3
A0A287U7I9	A0A287U7I9_HORVV	Steroid nuclear receptor ligand-binding
A0A287U820	A0A287U820_HORVV	Transcription factor GTE9
A0A287U8S1	A0A287U8S1_HORVV	4-hydroxy-3-methylbut-2-en-1-yl diphosphate synthase (Ferredoxin), chloroplastic
A0A287U993	A0A287U993_HORVV	Uncharacterized protein
A0A287U9C3	A0A287U9C3_HORVV	Calcium-binding EF hand family protein
A0A287U9S2	A0A287U9S2_HORVV	DUF4378 domain-containing protein
A0A287UA43	A0A287UA43_HORVV	Zinc finger (C3HC4-type RING finger) family protein
A0A287UB78	A0A287UB78_HORVV	Uncharacterized protein
A0A287UCS6	A0A287UCS6_HORVV	RING-type E3 ubiquitin transferase
A0A287UCX9	A0A287UCX9_HORVV	Uncharacterized protein
A0A287UD87	A0A287UD87_HORVV	Reticulon-like protein
A0A287UDK9	A0A287UDK9_HORVV	Trihelix transcription factor GT-2
A0A287UE43	A0A287UE43_HORVV	Uncharacterized protein
A0A287UE80	A0A287UE80_HORVV	Uncharacterized protein
A0A287UEH1	A0A287UEH1_HORVV	Uncharacterized protein
A0A287UER4	A0A287UER4_HORVV	Vesicle transport protein SEC20
A0A287UEW2	A0A287UEW2_HORVV	Uncharacterized protein
A0A287UFS1	A0A287UFS1_HORVV	Cir_N domain-containing protein
A0A287UG08	A0A287UG08_HORVV	GDSL esterase/lipase
A0A287UHE6	A0A287UHE6_HORVV	Calcium-dependent protein kinase 26
A0A287UHZ1	A0A287UHZ1_HORVV	Histone acetyltransferase
A0A287UI08	A0A287UI08_HORVV	Uncharacterized protein
A0A287UIA8	A0A287UIA8_HORVV	Oligopeptide transporter 4
A0A287UIX9	A0A287UIX9_HORVV	DNA-(apurinic or apyrimidinic site) endonuclease
A0A287UJ13	A0A287UJ13_HORVV	Growth-regulating factor
A0A287UJB2	A0A287UJB2_HORVV	Pectin acetylesterase
A0A287UK70	A0A287UK70_HORVV	Histone-lysine N-methyltransferase SUVR5
A0A287UKD2	A0A287UKD2_HORVV	Protein CROWDED NUCLEI 1
A0A287UKW8	A0A287UKW8_HORVV	Cysteine proteinase
A0A287ULF4	A0A287ULF4_HORVV	DIOX_N domain-containing protein
A0A287ULN1	A0A287ULN1_HORVV	WD_REPEATS_REGION domain-containing protein
A0A287ULP2	A0A287ULP2_HORVV	Uncharacterized protein
A0A287ULS0	A0A287ULS0_HORVV	Uncharacterized protein
A0A287UMR5	A0A287UMR5_HORVV	Cellulose synthase-like protein E1
A0A287UMX1	A0A287UMX1_HORVV	Uncharacterized protein
A0A287UNB5	A0A287UNB5_HORVV	NHL domain-containing protein
A0A287UPS1	A0A287UPS1_HORVV	Glycerophosphodiester phosphodiesterase
A0A287UPU7	A0A287UPU7_HORVV	Sialidase domain-containing protein
A0A287UQV6	A0A287UQV6_HORVV	Uncharacterized protein
A0A287UT49	A0A287UT49_HORVV	Methyltransferase
A0A287UT89	A0A287UT89_HORVV	Transcription factor MYB41-like
A0A287UTI4	A0A287UTI4_HORVV	Glycosyltransferase
A0A287UTL6	A0A287UTL6_HORVV	Uncharacterized protein
A0A287UTN5	A0A287UTN5_HORVV	Uncharacterized protein
A0A287UTV6	A0A287UTV6_HORVV	DNA repair and recombination protein RAD54
A0A287UU06	A0A287UU06_HORVV	Fucosyltransferase
A0A287UUI0	A0A287UUI0_HORVV	Uncharacterized protein
A0A287UVG9	A0A287UVG9_HORVV	BPI1 domain-containing protein
A0A287UWX6	A0A287UWX6_HORVV	FRIGIDA interacting protein 1
A0A287UX25	A0A287UX25_HORVV	Uncharacterized protein
A0A287UXW9	A0A287UXW9_HORVV	SIAH-type domain-containing protein
A0A287UYL8	A0A287UYL8_HORVV	Uncharacterized protein
A0A287UYU6	A0A287UYU6_HORVV	Ubiquitin carboxyl-terminal hydrolase
A0A287UZ65	A0A287UZ65_HORVV	Uncharacterized protein
A0A287V023	A0A287V023_HORVV	AUGMIN subunit 8-like
A0A287V0K3	A0A287V0K3_HORVV	Uncharacterized protein
A0A287V1G9	A0A287V1G9_HORVV	C2 domain-containing protein
A0A287V1L3	A0A287V1L3_HORVV	Vegetative cell wall protein gp1-like
A0A287V1V4	A0A287V1V4_HORVV	BFN domain-containing protein
A0A287V2Q6	A0A287V2Q6_HORVV	Pentatricopeptide repeat-containing protein
A0A287V391	A0A287V391_HORVV	GATA-type domain-containing protein
A0A287V3M1	A0A287V3M1_HORVV	B3 domain-containing protein
A0A287V3T6	A0A287V3T6_HORVV	Fe2OG dioxygenase domain-containing protein
A0A287V427	A0A287V427_HORVV	Uncharacterized protein
A0A287V4H4	A0A287V4H4_HORVV	Uncharacterized protein
A0A287V554	A0A287V554_HORVV	Uncharacterized protein
A0A287V5Z7	A0A287V5Z7_HORVV	3-ketoacyl-CoA thiolase 2, peroxisomal
A0A287V631	A0A287V631_HORVV	HMA domain-containing protein
A0A287V6H1	A0A287V6H1_HORVV	Uncharacterized protein
A0A287V773	A0A287V773_HORVV	Uncharacterized protein
A0A287V821	A0A287V821_HORVV	Acyl-CoA-binding domain-containing protein 4
A0A287V8H8	A0A287V8H8_HORVV	Uncharacterized protein
A0A287V9L6	A0A287V9L6_HORVV	Uncharacterized protein
A0A287V9Q2	A0A287V9Q2_HORVV	Uncharacterized protein
A0A287VA02	A0A287VA02_HORVV	Disease resistance protein
A0A287VAE8	A0A287VAE8_HORVV	Uncharacterized protein
A0A287VAH0	A0A287VAH0_HORVV	Uncharacterized protein
A0A287VC55	A0A287VC55_HORVV	Uncharacterized protein
A0A287VD25	A0A287VD25_HORVV	NB-ARC domain-containing protein
A0A287VD77	A0A287VD77_HORVV	Uncharacterized protein
A0A287VDE0	A0A287VDE0_HORVV	Fork-head domain-containing protein
A0A287VE25	A0A287VE25_HORVV	Alpha-dioxygenase 1
A0A287VEE0	A0A287VEE0_HORVV	NB-ARC domain-containing protein
A0A287VEL7	A0A287VEL7_HORVV	Uncharacterized protein
A0A287VFB8	A0A287VFB8_HORVV	F-box domain-containing protein
A0A287VG89	A0A287VG89_HORVV	Disease resistance protein RGA3
A0A287VGE9	A0A287VGE9_HORVV	Disease resistance protein RPM1
A0A287VGJ1	A0A287VGJ1_HORVV	O-methyltransferase ZRP4
A0A287VH39	A0A287VH39_HORVV	Uncharacterized protein
A0A287VH48	A0A287VH48_HORVV	Uncharacterized protein
A0A287VHJ1	A0A287VHJ1_HORVV	Uncharacterized protein
A0A287VHY2	A0A287VHY2_HORVV	Stem 28 kDa glycoprotein
A0A287VHZ1	A0A287VHZ1_HORVV	Uncharacterized protein
A0A287VIC4	A0A287VIC4_HORVV	Uncharacterized protein
A0A287VIT5	A0A287VIT5_HORVV	Protein TolA
A0A287VJ90	A0A287VJ90_HORVV	FBA_3 domain-containing protein
A0A287VK78	A0A287VK78_HORVV	Phosphopyruvate hydratase
A0A287VK93	A0A287VK93_HORVV	Protein cornichon homolog 4-like
A0A287VLB3	A0A287VLB3_HORVV	Glycosyltransferase
A0A287VLD8	A0A287VLD8_HORVV	Uncharacterized protein
A0A287VLL4	A0A287VLL4_HORVV	Tify domain-containing protein
A0A287VM60	A0A287VM60_HORVV	Wall-associated kinase 2
A0A287VM92	A0A287VM92_HORVV	Early nodulin-related
A0A287VMD1	A0A287VMD1_HORVV	Protein kinase domain-containing protein
A0A287VMD6	A0A287VMD6_HORVV	Chalcone synthase
A0A287VML8	A0A287VML8_HORVV	Uncharacterized protein
A0A287VMP5	A0A287VMP5_HORVV	GDSL esterase/lipase
A0A287VNY5	A0A287VNY5_HORVV	Gamma carbonic anhydrase 1, mitochondrial
A0A287VQ20	A0A287VQ20_HORVV	Rx_N domain-containing protein
A0A287VQ40	A0A287VQ40_HORVV	Protein FAM133B
A0A287VRC7	A0A287VRC7_HORVV	Peptide transporter
A0A287VS04	A0A287VS04_HORVV	Disease resistance protein RGA3
A0A287VSQ5	A0A287VSQ5_HORVV	Uncharacterized protein
A0A287VSQ6	A0A287VSQ6_HORVV	Uncharacterized protein
A0A287VV74	A0A287VV74_HORVV	Uncharacterized protein
A0A287VVP2	A0A287VVP2_HORVV	DUF4283 domain-containing protein
A0A287VVT0	A0A287VVT0_HORVV	Uncharacterized protein
A0A287VVW6	A0A287VVW6_HORVV	Uncharacterized protein
A0A287VWF9	A0A287VWF9_HORVV	Replication termination factor 2
A0A287VWQ9	A0A287VWQ9_HORVV	BTB/POZ domain-containing protein NPY1
A0A287VX39	A0A287VX39_HORVV	Pentatricopeptide repeat-containing protein
A0A287VX99	A0A287VX99_HORVV	Uncharacterized protein
A0A287VXS6	A0A287VXS6_HORVV	ULP_PROTEASE domain-containing protein
A0A287VXY9	A0A287VXY9_HORVV	Uncharacterized protein
A0A287VY06	A0A287VY06_HORVV	Uncharacterized protein
A0A287VZE3	A0A287VZE3_HORVV	Uncharacterized protein
A0A287VZJ6	A0A287VZJ6_HORVV	Pentatricopeptide repeat-containing protein
A0A287W0Q0	A0A287W0Q0_HORVV	Homeodomain GLABROUS 11
A0A287W0Q2	A0A287W0Q2_HORVV	Transcription factor
A0A287W100	A0A287W100_HORVV	Fucosyltransferase
A0A287W1I5	A0A287W1I5_HORVV	Uncharacterized protein
A0A287W396	A0A287W396_HORVV	DCD domain-containing protein
A0A287W3C6	A0A287W3C6_HORVV	Uncharacterized protein
A0A287W3D6	A0A287W3D6_HORVV	Uncharacterized protein
A0A287W3F1	A0A287W3F1_HORVV	Uncharacterized protein
A0A287W4D3	A0A287W4D3_HORVV	Uncharacterized protein
A0A287W4H2	A0A287W4H2_HORVV	Uncharacterized protein
A0A287W5E2	A0A287W5E2_HORVV	Uncharacterized protein
A0A287W5J8	A0A287W5J8_HORVV	Uncharacterized protein
A0A287W6J2	A0A287W6J2_HORVV	Polyprotein
A0A287W6T5	A0A287W6T5_HORVV	Microtubule-associated protein 70-2
A0A287W7Q0	A0A287W7Q0_HORVV	Uncharacterized protein
A0A287W7S2	A0A287W7S2_HORVV	Cell number regulator 2-like
A0A287W8F1	A0A287W8F1_HORVV	Uncharacterized protein
A0A287W8H0	A0A287W8H0_HORVV	Uncharacterized protein
A0A287W9B1	A0A287W9B1_HORVV	Uncharacterized protein
A0A287W9T8	A0A287W9T8_HORVV	Embryogenesis transmembrane protein-like
A0A287WB06	A0A287WB06_HORVV	Uncharacterized protein
A0A287WBR8	A0A287WBR8_HORVV	Uncharacterized protein
A0A287WBU5	A0A287WBU5_HORVV	Fimbrin-2
A0A287WD71	A0A287WD71_HORVV	Uncharacterized protein
A0A287WDE5	A0A287WDE5_HORVV	Pentatricopeptide repeat-containing protein
A0A287WEM0	A0A287WEM0_HORVV	Uncharacterized protein
A0A287WFK0	A0A287WFK0_HORVV	Uncharacterized protein
A0A287WFP7	A0A287WFP7_HORVV	Uncharacterized protein
A0A287WFV9	A0A287WFV9_HORVV	Protein ENHANCED DOWNY MILDEW 2-like
A0A287WGQ3	A0A287WGQ3_HORVV	Uncharacterized protein
A0A287WH57	A0A287WH57_HORVV	Uncharacterized protein
A0A287WIV0	A0A287WIV0_HORVV	Uncharacterized protein
A0A287WIW7	A0A287WIW7_HORVV	Uncharacterized protein
A0A287WJ62	A0A287WJ62_HORVV	Protein TAR1
A0A287WJX2	A0A287WJX2_HORVV	Uncharacterized protein
A0A287WKC1	A0A287WKC1_HORVV	O-fucosyltransferase family protein
A0A287WKZ0	A0A287WKZ0_HORVV	Uncharacterized protein
A0A287WL21	A0A287WL21_HORVV	Uncharacterized protein
A0A287WL23	A0A287WL23_HORVV	Methionine aminopeptidase 2
A0A287WLH6	A0A287WLH6_HORVV	Uncharacterized protein
A0A287WLL8	A0A287WLL8_HORVV	Uncharacterized protein
A0A287WLW9	A0A287WLW9_HORVV	Uncharacterized protein
A0A287WMV7	A0A287WMV7_HORVV	Manganese-dependent ADP-ribose/CDP-alcohol diphosphatase
A0A287WNK3	A0A287WNK3_HORVV	Uncharacterized protein
A0A287WPQ7	A0A287WPQ7_HORVV	Probable magnesium transporter
A0A287WQ03	A0A287WQ03_HORVV	SET domain-containing protein
A0A287WQ79	A0A287WQ79_HORVV	Apyrase 6
A0A287WRE2	A0A287WRE2_HORVV	Protein TOPLESS
A0A287WRI7	A0A287WRI7_HORVV	Uncharacterized protein
A0A287WRS2	A0A287WRS2_HORVV	RRM domain-containing protein
A0A287WRU5	A0A287WRU5_HORVV	F-box domain-containing protein
A0A287WSF7	A0A287WSF7_HORVV	Lipoprotein
A0A287WSK3	A0A287WSK3_HORVV	Uncharacterized protein
A0A287WSN7	A0A287WSN7_HORVV	Uncharacterized protein
A0A287WSP9	A0A287WSP9_HORVV	Carrier domain-containing protein
A0A287WTB9	A0A287WTB9_HORVV	Myb-like domain-containing protein
A0A287WU39	A0A287WU39_HORVV	DNA topoisomerase I
A0A287WV16	A0A287WV16_HORVV	Oxidoreductase
A0A287WWM4	A0A287WWM4_HORVV	J domain-containing protein
A0A287WXD8	A0A287WXD8_HORVV	Myeloid leukemia factor 1
A0A287WY76	A0A287WY76_HORVV	Polyadenylate-binding protein-interacting protein 9
A0A287WZ54	A0A287WZ54_HORVV	Protein DEFECTIVE IN MERISTEM SILENCING 3-like
A0A287WZ70	A0A287WZ70_HORVV	Uncharacterized protein
A0A287WZQ8	A0A287WZQ8_HORVV	Vacuolar protein sorting-associated protein 33B
A0A287WZQ9	A0A287WZQ9_HORVV	Uncharacterized protein
A0A287X014	A0A287X014_HORVV	Protein kinase domain-containing protein
A0A287X0P7	A0A287X0P7_HORVV	Uncharacterized protein
A0A287X128	A0A287X128_HORVV	Tetratricopeptide repeat protein
A0A287X452	A0A287X452_HORVV	Phosphoglucomutase (alpha-D-glucose-1,6-bisphosphate-dependent)
A0A287X4M9	A0A287X4M9_HORVV	Acyl-coenzyme A oxidase
A0A287X755	A0A287X755_HORVV	Transmembrane protein
A0A287X7A2	A0A287X7A2_HORVV	Phospholipid-transporting ATPase
A0A287X7R5	A0A287X7R5_HORVV	Uncharacterized protein
A0A287X8U4	A0A287X8U4_HORVV	Uncharacterized protein
A0A287X9P0	A0A287X9P0_HORVV	TPR_REGION domain-containing protein
A0A287X9P1	A0A287X9P1_HORVV	Transcription factor GAMYB
A0A287XA91	A0A287XA91_HORVV	Serine carboxypeptidase-like 52
A0A287XAS7	A0A287XAS7_HORVV	UPF0183 protein At3g51130
A0A287XD56	A0A287XD56_HORVV	Uncharacterized protein
A0A287XD77	A0A287XD77_HORVV	Peroxidase
A0A287XDC7	A0A287XDC7_HORVV	F-box domain-containing protein
A0A287XDC9	A0A287XDC9_HORVV	Disease resistance protein
A0A287XEL7	A0A287XEL7_HORVV	Benzyl alcohol O-benzoyltransferase
A0A287XFM2	A0A287XFM2_HORVV	Response regulatory domain-containing protein
A0A287XI45	A0A287XI45_HORVV	Disease resistance protein RPM1-like
A0A287XI51	A0A287XI51_HORVV	Uncharacterized protein
A0A287XIF1	A0A287XIF1_HORVV	Uncharacterized protein
A0A287XIX1	A0A287XIX1_HORVV	Uncharacterized protein
A0A287XKF9	A0A287XKF9_HORVV	Uncharacterized protein
A0A287XKW6	A0A287XKW6_HORVV	Uncharacterized protein
A0A287XLS5	A0A287XLS5_HORVV	Auxin response factor
A0A287XM74	A0A287XM74_HORVV	J domain-containing protein
A0A287XND7	A0A287XND7_HORVV	Exosome complex component RRP45B
A0A287XP46	A0A287XP46_HORVV	Uncharacterized protein
A0A287XPA3	A0A287XPA3_HORVV	Uncharacterized protein
A0A287XPL3	A0A287XPL3_HORVV	Uncharacterized protein
A0A287XPN9	A0A287XPN9_HORVV	Auxin-responsive protein SAUR71-like
A0A287XQX2	A0A287XQX2_HORVV	Uncharacterized protein
A0A287XRF7	A0A287XRF7_HORVV	Uncharacterized protein
A0A287XRM0	A0A287XRM0_HORVV	Auxin response factor
A0A287XRM4	A0A287XRM4_HORVV	AAI domain-containing protein
A0A287XS03	A0A287XS03_HORVV	Actin-related protein 2/3 complex subunit 3
A0A287XS13	A0A287XS13_HORVV	Defensin-like protein
A0A287XSI4	A0A287XSI4_HORVV	Core-2/I-branching beta-1,6-N-acetylglucosaminyltransferase family protein
A0A287XUX6	A0A287XUX6_HORVV	Uncharacterized protein
A0A287XV96	A0A287XV96_HORVV	Uncharacterized protein
A0A287XX60	A0A287XX60_HORVV	Uncharacterized protein
A0A287XXH1	A0A287XXH1_HORVV	Uncharacterized protein
A0A287XZN1	A0A287XZN1_HORVV	BTB domain-containing protein
A0A287XZV5	A0A287XZV5_HORVV	Rx_N domain-containing protein
A0A287Y0Y9	A0A287Y0Y9_HORVV	Uncharacterized protein
A0A287Y1R8	A0A287Y1R8_HORVV	Fe2OG dioxygenase domain-containing protein
A0A287Y2C2	A0A287Y2C2_HORVV	Uncharacterized protein
A0A2R4QN14	A0A2R4QN14_HORVV	Putative pentatricopeptide (PPR) repeat-containing protein
A0A2R4QN15	A0A2R4QN15_HORVV	Putative pentatricopeptide (PPR) repeat-containing protein
A0A2R9IVW3	A0A2R9IVW3_HORVV	Cyclin N-terminal domain-containing protein
A0A2S1M4W6	A0A2S1M4W6_HORVV	SLAC1
A0A5C1YV39	A0A5C1YV39_HORVV	Acetyl-CoA carboxylase
A0A8I6W3G3	A0A8I6W3G3_HORVV	Phospholipid-transporting ATPase
A0A8I6W3H4	A0A8I6W3H4_HORVV	Hydrolase_4 domain-containing protein
A0A8I6W3I6	A0A8I6W3I6_HORVV	AAI domain-containing protein
A0A8I6W3J0	A0A8I6W3J0_HORVV	AAI domain-containing protein
A0A8I6W3J4	A0A8I6W3J4_HORVV	Flavin-containing monooxygenase
A0A8I6W3L4	A0A8I6W3L4_HORVV	Uncharacterized protein
A0A8I6W3M1	A0A8I6W3M1_HORVV	Uncharacterized protein
A0A8I6W3M3	A0A8I6W3M3_HORVV	Receptor-like serine/threonine-protein kinase
A0A8I6W3M8	A0A8I6W3M8_HORVV	GDSL esterase/lipase
A0A8I6W3N1	A0A8I6W3N1_HORVV	Dirigent protein
A0A8I6W3N6	A0A8I6W3N6_HORVV	NB-ARC domain-containing protein
A0A8I6W3P2	A0A8I6W3P2_HORVV	Fatty acyl-CoA reductase
A0A8I6W3Q0	A0A8I6W3Q0_HORVV	TMV resistance protein N-like
A0A8I6W3Q6	A0A8I6W3Q6_HORVV	Beta-galactosidase
A0A8I6W3R2	A0A8I6W3R2_HORVV	Uncharacterized protein
A0A8I6W3S9	A0A8I6W3S9_HORVV	Subtilisin-chymotrypsin inhibitor-2A
A0A8I6W3T4	A0A8I6W3T4_HORVV	NB-ARC domain-containing protein
A0A8I6W3U1	A0A8I6W3U1_HORVV	Protein kinase domain-containing protein
A0A8I6W3U7	A0A8I6W3U7_HORVV	Chalcone synthase
A0A8I6W3V3	A0A8I6W3V3_HORVV	Glycosyltransferase family 61 protein
A0A8I6W3W0	A0A8I6W3W0_HORVV	zf-Tim10_DDP domain-containing protein
A0A8I6W3W7	A0A8I6W3W7_HORVV	ACT domain-containing protein ACR
A0A8I6W3X0	A0A8I6W3X0_HORVV	ADF-H domain-containing protein
A0A8I6W3Y5	A0A8I6W3Y5_HORVV	rRNA N-glycosidase
A0A8I6W3Y7	A0A8I6W3Y7_HORVV	ATP-dependent DNA helicase
A0A8I6W3Z4	A0A8I6W3Z4_HORVV	PKS_ER domain-containing protein
A0A8I6W402	A0A8I6W402_HORVV	FolB domain-containing protein
A0A8I6W407	A0A8I6W407_HORVV	Lysosomal Pro-X carboxypeptidase
A0A8I6W410	A0A8I6W410_HORVV	Protein ORF59
A0A8I6W415	A0A8I6W415_HORVV	UDPGT domain-containing protein
A0A8I6W419	A0A8I6W419_HORVV	DEAD/DEAH box RNA helicase
A0A8I6W426	A0A8I6W426_HORVV	G protein-coupled receptor
A0A8I6W429	A0A8I6W429_HORVV	Serine/arginine-rich splicing factor RS2Z32
A0A8I6W435	A0A8I6W435_HORVV	Neprosin domain-containing protein
A0A8I6W436	A0A8I6W436_HORVV	YtxH domain-containing protein
A0A8I6W441	A0A8I6W441_HORVV	CDK16
A0A8I6W449	A0A8I6W449_HORVV	Pentatricopeptide repeat-containing protein
A0A8I6W452	A0A8I6W452_HORVV	Secreted protein
A0A8I6W472	A0A8I6W472_HORVV	HECT-type E3 ubiquitin transferase
A0A8I6W477	A0A8I6W477_HORVV	RING-type E3 ubiquitin transferase
A0A8I6W492	A0A8I6W492_HORVV	YcaO domain-containing protein
A0A8I6W497	A0A8I6W497_HORVV	Importin N-terminal domain-containing protein
A0A8I6W4A1	A0A8I6W4A1_HORVV	Isovaleryl-CoA dehydrogenase, mitochondrial
A0A8I6W4A7	A0A8I6W4A7_HORVV	Pentatricopeptide repeat-containing protein
A0A8I6W4B4	A0A8I6W4B4_HORVV	Dimer_Tnp_hAT domain-containing protein
A0A8I6W4B8	A0A8I6W4B8_HORVV	RRP15-like protein
A0A8I6W4C1	A0A8I6W4C1_HORVV	3'-5' exonuclease domain-containing protein
A0A8I6W4D6	A0A8I6W4D6_HORVV	Oxidoreductase
A0A8I6W4F7	A0A8I6W4F7_HORVV	Detected protein of confused Function
A0A8I6W4G2	A0A8I6W4G2_HORVV	Peroxidase
A0A8I6W4H0	A0A8I6W4H0_HORVV	DUF4371 domain-containing protein
A0A8I6W4I8	A0A8I6W4I8_HORVV	Auxin-responsive protein
A0A8I6W4J2	A0A8I6W4J2_HORVV	Uncharacterized protein
A0A8I6W4K4	A0A8I6W4K4_HORVV	Replication protein A subunit
A0A8I6W4L1	A0A8I6W4L1_HORVV	Ribosome biogenesis protein NOP53
A0A8I6W4M1	A0A8I6W4M1_HORVV	Genome assembly, chromosome: II
A0A8I6W4M6	A0A8I6W4M6_HORVV	YcaO domain-containing protein
A0A8I6W4M9	A0A8I6W4M9_HORVV	Calmodulin
A0A8I6W4N3	A0A8I6W4N3_HORVV	Coiled-coil domain-containing protein 167
A0A8I6W4N7	A0A8I6W4N7_HORVV	Pentatricopeptide repeat-containing protein
A0A8I6W4P4	A0A8I6W4P4_HORVV	BHLH domain-containing protein
A0A8I6W4Q0	A0A8I6W4Q0_HORVV	PMEI domain-containing protein
A0A8I6W4Q2	A0A8I6W4Q2_HORVV	Ankyrin-2
A0A8I6W4Q8	A0A8I6W4Q8_HORVV	CULLIN_2 domain-containing protein
A0A8I6W4R4	A0A8I6W4R4_HORVV	RING-type domain-containing protein
A0A8I6W4R8	A0A8I6W4R8_HORVV	GRF-type domain-containing protein
A0A8I6W4S7	A0A8I6W4S7_HORVV	ORF75
A0A8I6W4T3	A0A8I6W4T3_HORVV	YcaO domain-containing protein
A0A8I6W4T6	A0A8I6W4T6_HORVV	Flavin-containing monooxygenase
A0A8I6W4V0	A0A8I6W4V0_HORVV	HECT-type E3 ubiquitin transferase
A0A8I6W4V5	A0A8I6W4V5_HORVV	YcaO domain-containing protein
A0A8I6W4W0	A0A8I6W4W0_HORVV	Transcription initiation factor TFIID subunit 13
A0A8I6W4W5	A0A8I6W4W5_HORVV	Receptor-like serine/threonine-protein kinase
A0A8I6W4W9	A0A8I6W4W9_HORVV	PIG-H domain-containing protein
A0A8I6W4X4	A0A8I6W4X4_HORVV	Ribosomal_L16 domain-containing protein
A0A8I6W4Y9	A0A8I6W4Y9_HORVV	Uncharacterized protein
A0A8I6W501	A0A8I6W501_HORVV	Glycosyltransferase
A0A8I6W507	A0A8I6W507_HORVV	PB1 domain-containing protein
A0A8I6W514	A0A8I6W514_HORVV	Myb-like domain-containing protein
A0A8I6W517	A0A8I6W517_HORVV	Heat shock 70 kDa protein 14
A0A8I6W531	A0A8I6W531_HORVV	Transposase
A0A8I6W545	A0A8I6W545_HORVV	Non-specific serine/threonine protein kinase
A0A8I6W562	A0A8I6W562_HORVV	YcaO domain-containing protein
A0A8I6W583	A0A8I6W583_HORVV	RING-type domain-containing protein
A0A8I6W588	A0A8I6W588_HORVV	GRF-type domain-containing protein
A0A8I6W593	A0A8I6W593_HORVV	S-type anion channel SLAH2
A0A8I6W596	A0A8I6W596_HORVV	Homeobox protein cut-like
A0A8I6W5A0	A0A8I6W5A0_HORVV	DUF2218 domain-containing protein
A0A8I6W5A8	A0A8I6W5A8_HORVV	Protein kinase domain-containing protein
A0A8I6W5B4	A0A8I6W5B4_HORVV	PAP-associated domain-containing protein
A0A8I6W5B7	A0A8I6W5B7_HORVV	PA domain-containing protein
A0A8I6W5C4	A0A8I6W5C4_HORVV	IENR2 domain-containing protein
A0A8I6W5D2	A0A8I6W5D2_HORVV	Uncharacterized protein
A0A8I6W5E1	A0A8I6W5E1_HORVV	Zinc finger MYM-type protein 1-like
A0A8I6W5E6	A0A8I6W5E6_HORVV	NAB domain-containing protein
A0A8I6W5F0	A0A8I6W5F0_HORVV	NAD(P)H dehydrogenase (quinone)
A0A8I6W5G0	A0A8I6W5G0_HORVV	ULP_PROTEASE domain-containing protein
A0A8I6W5G8	A0A8I6W5G8_HORVV	Myb-like domain-containing protein
A0A8I6W5H3	A0A8I6W5H3_HORVV	Uncharacterized protein
A0A8I6W5H7	A0A8I6W5H7_HORVV	Pectate lyase
A0A8I6W5J1	A0A8I6W5J1_HORVV	RING-type domain-containing protein
A0A8I6W5J6	A0A8I6W5J6_HORVV	CCT domain-containing protein
A0A8I6W5L4	A0A8I6W5L4_HORVV	AP2 domain transcription factor AP2XII-5
A0A8I6W5M6	A0A8I6W5M6_HORVV	Cytokinin riboside 5'-monophosphate phosphoribohydrolase
A0A8I6W5N0	A0A8I6W5N0_HORVV	Genome assembly, chromosome: II
A0A8I6W5N6	A0A8I6W5N6_HORVV	NAM-associated domain-containing protein
A0A8I6W5P4	A0A8I6W5P4_HORVV	GRF-type domain-containing protein
A0A8I6W5P6	A0A8I6W5P6_HORVV	MATH domain-containing protein
A0A8I6W5Q2	A0A8I6W5Q2_HORVV	CCDC66 domain-containing protein
A0A8I6W5Q4	A0A8I6W5Q4_HORVV	Prefoldin subunit 5
A0A8I6W5R3	A0A8I6W5R3_HORVV	CCHC-type domain-containing protein
A0A8I6W5S4	A0A8I6W5S4_HORVV	Ripening-related protein grip22
A0A8I6W5S9	A0A8I6W5S9_HORVV	DNA ligase
A0A8I6W5T3	A0A8I6W5T3_HORVV	UBC core domain-containing protein
A0A8I6W5V2	A0A8I6W5V2_HORVV	Benzyl alcohol O-benzoyltransferase
A0A8I6W5V7	A0A8I6W5V7_HORVV	Tetraspanin-10-like
A0A8I6W5W7	A0A8I6W5W7_HORVV	Coiled-coil domain-containing protein 167
A0A8I6W5X7	A0A8I6W5X7_HORVV	ANK_REP_REGION domain-containing protein
A0A8I6W5Y0	A0A8I6W5Y0_HORVV	GTD-binding domain-containing protein
A0A8I6W5Y4	A0A8I6W5Y4_HORVV	Cyclin N-terminal domain-containing protein
A0A8I6W5Z1	A0A8I6W5Z1_HORVV	Trehalase
A0A8I6W609	A0A8I6W609_HORVV	Glutathione transferase
A0A8I6W620	A0A8I6W620_HORVV	Proline-rich receptor-like protein kinase perk9
A0A8I6W632	A0A8I6W632_HORVV	YcaO domain-containing protein
A0A8I6W639	A0A8I6W639_HORVV	Lysine-specific demethylase JMJ706-like
A0A8I6W643	A0A8I6W643_HORVV	4-coumarate--CoA ligase-like 6
A0A8I6W650	A0A8I6W650_HORVV	XRCC1_N domain-containing protein
A0A8I6W656	A0A8I6W656_HORVV	Proto-oncogene FRAT1
A0A8I6W659	A0A8I6W659_HORVV	YcaO domain-containing protein
A0A8I6W661	A0A8I6W661_HORVV	DUF295 domain-containing protein
A0A8I6W669	A0A8I6W669_HORVV	Dirigent protein
A0A8I6W672	A0A8I6W672_HORVV	RING-type domain-containing protein
A0A8I6W681	A0A8I6W681_HORVV	Serine/threonine-protein kinase
A0A8I6W688	A0A8I6W688_HORVV	CCHC-type domain-containing protein
A0A8I6W691	A0A8I6W691_HORVV	GRF-type domain-containing protein
A0A8I6W694	A0A8I6W694_HORVV	YcaO domain-containing protein
A0A8I6W6A8	A0A8I6W6A8_HORVV	SH2 domain-containing protein
A0A8I6W6B3	A0A8I6W6B3_HORVV	Beta-amylase
A0A8I6W6B5	A0A8I6W6B5_HORVV	RNA-binding KH domain-containing protein PEPPER
A0A8I6W6C0	A0A8I6W6C0_HORVV	Palmitoyl-protein thioesterase 1-like
A0A8I6W6C5	A0A8I6W6C5_HORVV	ULP_PROTEASE domain-containing protein
A0A8I6W6C9	A0A8I6W6C9_HORVV	Cell number regulator 6
A0A8I6W6E1	A0A8I6W6E1_HORVV	Transmembrane protein
A0A8I6W6E6	A0A8I6W6E6_HORVV	Uncharacterized protein
A0A8I6W6F7	A0A8I6W6F7_HORVV	C2H2-type domain-containing protein
A0A8I6W6G5	A0A8I6W6G5_HORVV	Uncharacterized protein
A0A8I6W6H5	A0A8I6W6H5_HORVV	cDNA clone:002-142-C01, full insert sequence
A0A8I6W6I3	A0A8I6W6I3_HORVV	Glycine-rich cell wall structural protein 1
A0A8I6W6I7	A0A8I6W6I7_HORVV	RanBD1 domain-containing protein
A0A8I6W6J0	A0A8I6W6J0_HORVV	RING-type domain-containing protein
A0A8I6W6J3	A0A8I6W6J3_HORVV	Protein kinase domain-containing protein
A0A8I6W6J8	A0A8I6W6J8_HORVV	Cell division cycle protein 48
A0A8I6W6K6	A0A8I6W6K6_HORVV	IU_nuc_hydro domain-containing protein
A0A8I6W6L0	A0A8I6W6L0_HORVV	Protein phosphatase 1 regulatory subunit 15A
A0A8I6W6L3	A0A8I6W6L3_HORVV	Uncharacterized protein
A0A8I6W6M5	A0A8I6W6M5_HORVV	RING-type E3 ubiquitin transferase
A0A8I6W6N1	A0A8I6W6N1_HORVV	Aamy domain-containing protein
A0A8I6W6N5	A0A8I6W6N5_HORVV	zf-XS domain-containing protein
A0A8I6W6P5	A0A8I6W6P5_HORVV	WAT1-related protein
A0A8I6W6Q7	A0A8I6W6Q7_HORVV	DNA replication licensing factor MCM2
A0A8I6W6R2	A0A8I6W6R2_HORVV	AP2/ERF domain-containing protein
A0A8I6W6U3	A0A8I6W6U3_HORVV	Glycosyltransferase
A0A8I6W6U7	A0A8I6W6U7_HORVV	Type III endosome membrane protein TEMP
A0A8I6W6V6	A0A8I6W6V6_HORVV	GRF-type domain-containing protein
A0A8I6W6V8	A0A8I6W6V8_HORVV	Growth arrest and DNA damage-inducible proteins-interacting protein 1
A0A8I6W6X3	A0A8I6W6X3_HORVV	Cyclic nucleotide-binding domain-containing protein
A0A8I6W6X8	A0A8I6W6X8_HORVV	Transcription initiation factor IIB
A0A8I6W6Z2	A0A8I6W6Z2_HORVV	Phytocyanin domain-containing protein
A0A8I6W6Z7	A0A8I6W6Z7_HORVV	Glyoxysomal processing protease, glyoxysomal
A0A8I6W6Z8	A0A8I6W6Z8_HORVV	Ovule protein
A0A8I6W704	A0A8I6W704_HORVV	Uncharacterized protein
A0A8I6W708	A0A8I6W708_HORVV	BZIP domain-containing protein
A0A8I6W709	A0A8I6W709_HORVV	Uncharacterized protein
A0A8I6W718	A0A8I6W718_HORVV	AMPKBI domain-containing protein
A0A8I6W721	A0A8I6W721_HORVV	PMD domain-containing protein
A0A8I6W735	A0A8I6W735_HORVV	GRF-type domain-containing protein
A0A8I6W742	A0A8I6W742_HORVV	Uncharacterized protein
A0A8I6W745	A0A8I6W745_HORVV	WRKY domain-containing protein
A0A8I6W748	A0A8I6W748_HORVV	Reverse transcriptase domain-containing protein
A0A8I6W759	A0A8I6W759_HORVV	Uncharacterized protein
A0A8I6W763	A0A8I6W763_HORVV	Uncharacterized protein
A0A8I6W767	A0A8I6W767_HORVV	GDSL esterase/lipase
A0A8I6W770	A0A8I6W770_HORVV	DUF1618 domain-containing protein
A0A8I6W779	A0A8I6W779_HORVV	Aminotran_1_2 domain-containing protein
A0A8I6W781	A0A8I6W781_HORVV	Secreted protein
A0A8I6W785	A0A8I6W785_HORVV	PWWP domain-containing protein
A0A8I6W796	A0A8I6W796_HORVV	Respiratory burst oxidase homolog protein C
A0A8I6W7A6	A0A8I6W7A6_HORVV	Aldo_ket_red domain-containing protein
A0A8I6W7B0	A0A8I6W7B0_HORVV	PRONE domain-containing protein
A0A8I6W7B8	A0A8I6W7B8_HORVV	AP2/ERF domain-containing protein
A0A8I6W7C1	A0A8I6W7C1_HORVV	TPR_REGION domain-containing protein
A0A8I6W7D3	A0A8I6W7D3_HORVV	NAM-associated domain-containing protein
A0A8I6W7D7	A0A8I6W7D7_HORVV	dNK domain-containing protein
A0A8I6W7E0	A0A8I6W7E0_HORVV	Gibberellin regulated protein
A0A8I6W7E6	A0A8I6W7E6_HORVV	Claudin-like protein
A0A8I6W7E8	A0A8I6W7E8_HORVV	Polypyrimidine tract-binding protein homolog 3
A0A8I6W7F4	A0A8I6W7F4_HORVV	Carboxymethylenebutenolidase homolog
A0A8I6W7G6	A0A8I6W7G6_HORVV	Protein kinase domain-containing protein
A0A8I6W7G9	A0A8I6W7G9_HORVV	Calponin-homology (CH) domain-containing protein
A0A8I6W7H3	A0A8I6W7H3_HORVV	Dolichyl-diphosphooligosaccharide--protein glycotransferase
A0A8I6W7H7	A0A8I6W7H7_HORVV	Os01g0772600 protein
A0A8I6W7I4	A0A8I6W7I4_HORVV	POP4 domain-containing protein
A0A8I6W7I8	A0A8I6W7I8_HORVV	O-methyltransferase ZRP4
A0A8I6W7J3	A0A8I6W7J3_HORVV	Proline iminopeptidase
A0A8I6W7J7	A0A8I6W7J7_HORVV	BAG domain-containing protein
A0A8I6W7K8	A0A8I6W7K8_HORVV	Protein BREAST CANCER SUSCEPTIBILITY 1 homolog
A0A8I6W7M2	A0A8I6W7M2_HORVV	Reverse transcriptase Ty1/copia-type domain-containing protein
A0A8I6W7M7	A0A8I6W7M7_HORVV	Uncharacterized protein
A0A8I6W7N5	A0A8I6W7N5_HORVV	Polysacc_synt_4 domain-containing protein
A0A8I6W7P6	A0A8I6W7P6_HORVV	DUF4005 domain-containing protein
A0A8I6W7R2	A0A8I6W7R2_HORVV	TF-B3 domain-containing protein
A0A8I6W7R9	A0A8I6W7R9_HORVV	Receptor-like serine/threonine-protein kinase
A0A8I6W7S3	A0A8I6W7S3_HORVV	Btz domain-containing protein
A0A8I6W7U6	A0A8I6W7U6_HORVV	C2H2-type domain-containing protein
A0A8I6W7V1	A0A8I6W7V1_HORVV	RING-type domain-containing protein
A0A8I6W7V4	A0A8I6W7V4_HORVV	GRF-type domain-containing protein
A0A8I6W7V7	A0A8I6W7V7_HORVV	Uncharacterized protein
A0A8I6W7W2	A0A8I6W7W2_HORVV	Kunitz-type trypsin inhibitor KTI1
A0A8I6W7W5	A0A8I6W7W5_HORVV	NB-ARC domain-containing protein
A0A8I6W7X3	A0A8I6W7X3_HORVV	Nop domain-containing protein
A0A8I6W7X6	A0A8I6W7X6_HORVV	Hexosyltransferase
A0A8I6W7Y2	A0A8I6W7Y2_HORVV	ATP synthase subunit beta
A0A8I6W7Y7	A0A8I6W7Y7_HORVV	Protein kinase domain-containing protein
A0A8I6W7Z0	A0A8I6W7Z0_HORVV	EGF-like domain-containing protein
A0A8I6W807	A0A8I6W807_HORVV	Tropinone reductase-like
A0A8I6W840	A0A8I6W840_HORVV	F-box domain-containing protein
A0A8I6W856	A0A8I6W856_HORVV	LRRNT_2 domain-containing protein
A0A8I6W869	A0A8I6W869_HORVV	Protein CLAVATA 3
A0A8I6W878	A0A8I6W878_HORVV	Protein DMP2
A0A8I6W8A6	A0A8I6W8A6_HORVV	BTB domain-containing protein
A0A8I6W8B2	A0A8I6W8B2_HORVV	CCHC-type domain-containing protein
A0A8I6W8C2	A0A8I6W8C2_HORVV	Eukaryotic translation initiation factor 3 subunit D
A0A8I6W8D8	A0A8I6W8D8_HORVV	PMD domain-containing protein
A0A8I6W8E1	A0A8I6W8E1_HORVV	Transcription factor MYB21
A0A8I6W8F2	A0A8I6W8F2_HORVV	WRKY domain-containing protein
A0A8I6W8G9	A0A8I6W8G9_HORVV	Uncharacterized protein
A0A8I6W8H6	A0A8I6W8H6_HORVV	Mitogen-activated protein kinase
A0A8I6W8H9	A0A8I6W8H9_HORVV	Calcium-binding protein CML15
A0A8I6W8I5	A0A8I6W8I5_HORVV	Voltage-dependent anion-selective channel
A0A8I6W8I8	A0A8I6W8I8_HORVV	zf-XS domain-containing protein
A0A8I6W8L5	A0A8I6W8L5_HORVV	MFS domain-containing protein
A0A8I6W8M4	A0A8I6W8M4_HORVV	Calcium-dependent protein kinase
A0A8I6W8N4	A0A8I6W8N4_HORVV	B-block_TFIIIC domain-containing protein
A0A8I6W8P0	A0A8I6W8P0_HORVV	Pectinesterase
A0A8I6W8P4	A0A8I6W8P4_HORVV	FBA_3 domain-containing protein
A0A8I6W8Q7	A0A8I6W8Q7_HORVV	RNA polymerase sigma factor
A0A8I6W8S0	A0A8I6W8S0_HORVV	Secreted protein
A0A8I6W8S7	A0A8I6W8S7_HORVV	WGS project CAEQ00000000 data, annotated contig
A0A8I6W8T2	A0A8I6W8T2_HORVV	HSA domain-containing protein
A0A8I6W8U6	A0A8I6W8U6_HORVV	Structural maintenance of chromosomes protein 5
A0A8I6W8V4	A0A8I6W8V4_HORVV	Disease resistance RPP13-like protein 1
A0A8I6W8W4	A0A8I6W8W4_HORVV	NB-ARC domain-containing protein
A0A8I6W8X4	A0A8I6W8X4_HORVV	Cytospin-A
A0A8I6W8X9	A0A8I6W8X9_HORVV	Serine/arginine-rich splicing factor RS31
A0A8I6W8Y4	A0A8I6W8Y4_HORVV	Genome assembly, chromosome: II
A0A8I6W8Y9	A0A8I6W8Y9_HORVV	Nucleolin-like
A0A8I6W8Z7	A0A8I6W8Z7_HORVV	Agmatine coumaroyltransferase-2-like
A0A8I6W903	A0A8I6W903_HORVV	Protein kinase domain-containing protein
A0A8I6W907	A0A8I6W907_HORVV	E3 ubiquitin-protein ligase TRIP12
A0A8I6W913	A0A8I6W913_HORVV	Rx_N domain-containing protein
A0A8I6W918	A0A8I6W918_HORVV	NB-ARC domain-containing protein
A0A8I6W932	A0A8I6W932_HORVV	Protein kinase domain-containing protein
A0A8I6W949	A0A8I6W949_HORVV	Chalcone synthase
A0A8I6W963	A0A8I6W963_HORVV	ATP synthase subunit alpha
A0A8I6W970	A0A8I6W970_HORVV	Chalcone synthase
A0A8I6W9A2	A0A8I6W9A2_HORVV	Glyoxylate reductase
A0A8I6W9B3	A0A8I6W9B3_HORVV	Acetyltransferase
A0A8I6W9C0	A0A8I6W9C0_HORVV	Subtilisin-like protease SBT1.7
A0A8I6W9C9	A0A8I6W9C9_HORVV	Rhomboid-like protein 19
A0A8I6W9D6	A0A8I6W9D6_HORVV	Embryogenesis transmembrane protein-like
A0A8I6W9E0	A0A8I6W9E0_HORVV	NB-ARC domain-containing protein
A0A8I6W9F2	A0A8I6W9F2_HORVV	Formin-like protein
A0A8I6W9G1	A0A8I6W9G1_HORVV	F-box domain-containing protein
A0A8I6W9G9	A0A8I6W9G9_HORVV	Terpene_synth domain-containing protein
A0A8I6W9H5	A0A8I6W9H5_HORVV	RuBisCO large subunit-binding protein subunit alpha, chloroplastic
A0A8I6W9I7	A0A8I6W9I7_HORVV	Genome assembly, chromosome: II
A0A8I6W9J3	A0A8I6W9J3_HORVV	Senescence-specific cysteine protease SAG39-like
A0A8I6W9K2	A0A8I6W9K2_HORVV	DUF4408 domain-containing protein
A0A8I6W9K7	A0A8I6W9K7_HORVV	Flavin-containing monooxygenase
A0A8I6W9L3	A0A8I6W9L3_HORVV	MI domain-containing protein
A0A8I6W9L7	A0A8I6W9L7_HORVV	Cysteine protease
A0A8I6W9M4	A0A8I6W9M4_HORVV	Glucose-6-phosphate 1-dehydrogenase
A0A8I6W9P5	A0A8I6W9P5_HORVV	Fe2OG dioxygenase domain-containing protein
A0A8I6W9Q0	A0A8I6W9Q0_HORVV	PHD domain-containing protein
A0A8I6W9R0	A0A8I6W9R0_HORVV	Proline-rich protein
A0A8I6W9R4	A0A8I6W9R4_HORVV	Fe2OG dioxygenase domain-containing protein
A0A8I6W9R7	A0A8I6W9R7_HORVV	Neprosin domain-containing protein
A0A8I6W9S1	A0A8I6W9S1_HORVV	Cystathionine gamma-synthase 1, chloroplastic
A0A8I6W9S7	A0A8I6W9S7_HORVV	DYW_deaminase domain-containing protein
A0A8I6W9T5	A0A8I6W9T5_HORVV	5'-3' exoribonuclease
A0A8I6W9T9	A0A8I6W9T9_HORVV	F-box domain-containing protein
A0A8I6W9U1	A0A8I6W9U1_HORVV	Amino_oxidase domain-containing protein
A0A8I6W9U8	A0A8I6W9U8_HORVV	MBD domain-containing protein
A0A8I6W9V2	A0A8I6W9V2_HORVV	Growth arrest and DNA damage-inducible proteins-interacting protein 1
A0A8I6W9V7	A0A8I6W9V7_HORVV	MATH domain-containing protein
A0A8I6W9W2	A0A8I6W9W2_HORVV	Expansin-B2
A0A8I6W9W7	A0A8I6W9W7_HORVV	DUF155 domain-containing protein
A0A8I6W9X7	A0A8I6W9X7_HORVV	Uncharacterized protein
A0A8I6W9Y0	A0A8I6W9Y0_HORVV	Plus3 domain-containing protein
A0A8I6W9Y6	A0A8I6W9Y6_HORVV	DUF295 domain-containing protein
A0A8I6WA00	A0A8I6WA00_HORVV	Zinc finger protein ZAT10
A0A8I6WA07	A0A8I6WA07_HORVV	Short-chain alcohol dehydrogenase
A0A8I6WA17	A0A8I6WA17_HORVV	Pectinesterase
A0A8I6WA24	A0A8I6WA24_HORVV	Growth arrest and DNA damage-inducible proteins-interacting protein 1
A0A8I6WA38	A0A8I6WA38_HORVV	DUF295 domain-containing protein
A0A8I6WA49	A0A8I6WA49_HORVV	zf-RVT domain-containing protein
A0A8I6WA54	A0A8I6WA54_HORVV	GDSL esterase/lipase
A0A8I6WA61	A0A8I6WA61_HORVV	Protein kinase domain-containing protein
A0A8I6WA69	A0A8I6WA69_HORVV	(+)-neomenthol dehydrogenase-like
A0A8I6WA78	A0A8I6WA78_HORVV	Nuclear pore complex protein NUP214
A0A8I6WA99	A0A8I6WA99_HORVV	FAD-binding FR-type domain-containing protein
A0A8I6WAA6	A0A8I6WAA6_HORVV	HDAC_interact domain-containing protein
A0A8I6WAB4	A0A8I6WAB4_HORVV	PMD domain-containing protein
A0A8I6WAB6	A0A8I6WAB6_HORVV	AMPKBI domain-containing protein
A0A8I6WAC3	A0A8I6WAC3_HORVV	Cas9_PI domain-containing protein
A0A8I6WAC6	A0A8I6WAC6_HORVV	Peroxidase
A0A8I6WAC7	A0A8I6WAC7_HORVV	RRM domain-containing protein
A0A8I6WAD3	A0A8I6WAD3_HORVV	RING-type E3 ubiquitin transferase
A0A8I6WAD5	A0A8I6WAD5_HORVV	AAI domain-containing protein
A0A8I6WAD8	A0A8I6WAD8_HORVV	AAI domain-containing protein
A0A8I6WAE0	A0A8I6WAE0_HORVV	F-box domain-containing protein
A0A8I6WAE5	A0A8I6WAE5_HORVV	Genome assembly, chromosome: II
A0A8I6WAE9	A0A8I6WAE9_HORVV	Uncharacterized protein
A0A8I6WAG4	A0A8I6WAG4_HORVV	UPF0481 protein
A0A8I6WAH1	A0A8I6WAH1_HORVV	WD_REPEATS_REGION domain-containing protein
A0A8I6WAH2	A0A8I6WAH2_HORVV	C2 domain-containing protein
A0A8I6WAH3	A0A8I6WAH3_HORVV	Peptidase A1 domain-containing protein
A0A8I6WAH5	A0A8I6WAH5_HORVV	Ovule protein
A0A8I6WAH8	A0A8I6WAH8_HORVV	GTP-binding protein Obg/CgtA
A0A8I6WAI1	A0A8I6WAI1_HORVV	Protein kinase domain-containing protein
A0A8I6WAI2	A0A8I6WAI2_HORVV	Protein kinase domain-containing protein
A0A8I6WAJ0	A0A8I6WAJ0_HORVV	Dirigent protein
A0A8I6WAJ1	A0A8I6WAJ1_HORVV	Uncharacterized protein
A0A8I6WAJ3	A0A8I6WAJ3_HORVV	Disease resistance protein
A0A8I6WAK7	A0A8I6WAK7_HORVV	CID domain-containing protein
A0A8I6WAK8	A0A8I6WAK8_HORVV	BHLH domain-containing protein
A0A8I6WAL6	A0A8I6WAL6_HORVV	PMD domain-containing protein
A0A8I6WAM1	A0A8I6WAM1_HORVV	Secreted protein
A0A8I6WAM6	A0A8I6WAM6_HORVV	Tyrosine-specific transport protein
A0A8I6WAM7	A0A8I6WAM7_HORVV	BRCT domain-containing protein
A0A8I6WAN0	A0A8I6WAN0_HORVV	Sigma 1-type opioid receptor
A0A8I6WAN2	A0A8I6WAN2_HORVV	RGH1
A0A8I6WAN7	A0A8I6WAN7_HORVV	3'-5' exonuclease domain-containing protein
A0A8I6WAN9	A0A8I6WAN9_HORVV	F-box domain-containing protein
A0A8I6WAP0	A0A8I6WAP0_HORVV	Genome assembly, chromosome: II
A0A8I6WAP5	A0A8I6WAP5_HORVV	Coiled-coil domain-containing protein 167
A0A8I6WAQ3	A0A8I6WAQ3_HORVV	3-oxoacyl-[acyl-carrier-protein] synthase
A0A8I6WAQ4	A0A8I6WAQ4_HORVV	3'-5' exonuclease domain-containing protein
A0A8I6WAQ7	A0A8I6WAQ7_HORVV	Uncharacterized protein
A0A8I6WAQ8	A0A8I6WAQ8_HORVV	GRF-type domain-containing protein
A0A8I6WAR1	A0A8I6WAR1_HORVV	Pectinesterase
A0A8I6WAR5	A0A8I6WAR5_HORVV	Homeobox domain-containing protein
A0A8I6WAR7	A0A8I6WAR7_HORVV	(+)-delta-cadinene synthase
A0A8I6WAR9	A0A8I6WAR9_HORVV	Galectin domain-containing protein
A0A8I6WAS0	A0A8I6WAS0_HORVV	4-hydroxybenzoate octaprenyltransferase
A0A8I6WAS4	A0A8I6WAS4_HORVV	Skp1_POZ domain-containing protein
A0A8I6WAS6	A0A8I6WAS6_HORVV	LRR receptor-like serine/threonine-protein kinase
A0A8I6WAS7	A0A8I6WAS7_HORVV	PMD domain-containing protein
A0A8I6WAT4	A0A8I6WAT4_HORVV	ORF75
A0A8I6WAT7	A0A8I6WAT7_HORVV	Abhydrolase_3 domain-containing protein
A0A8I6WAT8	A0A8I6WAT8_HORVV	TF-B3 domain-containing protein
A0A8I6WAU3	A0A8I6WAU3_HORVV	LisH domain-containing protein
A0A8I6WAU6	A0A8I6WAU6_HORVV	Trafficking protein particle complex subunit
A0A8I6WAV4	A0A8I6WAV4_HORVV	G_PROTEIN_RECEP_F1_2 domain-containing protein
A0A8I6WAV7	A0A8I6WAV7_HORVV	Methyltransf_25 domain-containing protein
A0A8I6WAW1	A0A8I6WAW1_HORVV	Peroxidase
A0A8I6WAW3	A0A8I6WAW3_HORVV	Uncharacterized protein
A0A8I6WAW9	A0A8I6WAW9_HORVV	DUF295 domain-containing protein
A0A8I6WAX0	A0A8I6WAX0_HORVV	Genome assembly, chromosome: II
A0A8I6WAX3	A0A8I6WAX3_HORVV	Lectin_legB domain-containing protein
A0A8I6WAX6	A0A8I6WAX6_HORVV	3'-5' exonuclease domain-containing protein
A0A8I6WAX8	A0A8I6WAX8_HORVV	PEROXIDASE_4 domain-containing protein
A0A8I6WAY3	A0A8I6WAY3_HORVV	J domain-containing protein
A0A8I6WAY8	A0A8I6WAY8_HORVV	Coiled-coil domain-containing protein 167
A0A8I6WAY9	A0A8I6WAY9_HORVV	Dimer_Tnp_hAT domain-containing protein
A0A8I6WAZ6	A0A8I6WAZ6_HORVV	Uncharacterized protein
A0A8I6WB02	A0A8I6WB02_HORVV	Uncharacterized protein
A0A8I6WB07	A0A8I6WB07_HORVV	Glucan endo-1,3-beta-glucosidase 14
A0A8I6WB09	A0A8I6WB09_HORVV	Glyco_trans_2-like domain-containing protein
A0A8I6WB11	A0A8I6WB11_HORVV	Uncharacterized protein
A0A8I6WB17	A0A8I6WB17_HORVV	Glutamyl-tRNA reductase
A0A8I6WB25	A0A8I6WB25_HORVV	Stress-induced protein
A0A8I6WB26	A0A8I6WB26_HORVV	Caffeic acid 3-O-methyltransferase
A0A8I6WB35	A0A8I6WB35_HORVV	DYW_deaminase domain-containing protein
A0A8I6WB37	A0A8I6WB37_HORVV	PWWP domain-containing protein
A0A8I6WB39	A0A8I6WB39_HORVV	Transglycosylase
A0A8I6WB42	A0A8I6WB42_HORVV	YcaO domain-containing protein
A0A8I6WB52	A0A8I6WB52_HORVV	AAI domain-containing protein
A0A8I6WB53	A0A8I6WB53_HORVV	Ovule protein
A0A8I6WB56	A0A8I6WB56_HORVV	F-box domain-containing protein
A0A8I6WB57	A0A8I6WB57_HORVV	Protein kinase domain-containing protein
A0A8I6WB62	A0A8I6WB62_HORVV	E3 SUMO-protein ligase SIZ1
A0A8I6WB64	A0A8I6WB64_HORVV	3'-5' exonuclease domain-containing protein
A0A8I6WB65	A0A8I6WB65_HORVV	3'-5' exonuclease domain-containing protein
A0A8I6WB73	A0A8I6WB73_HORVV	Ovule protein
A0A8I6WB75	A0A8I6WB75_HORVV	DUF4283 domain-containing protein
A0A8I6WB77	A0A8I6WB77_HORVV	GRF-type domain-containing protein
A0A8I6WB81	A0A8I6WB81_HORVV	3'-5' exonuclease domain-containing protein
A0A8I6WB83	A0A8I6WB83_HORVV	Transcriptional regulator ICP22 homolog
A0A8I6WB86	A0A8I6WB86_HORVV	Genome assembly, chromosome: II
A0A8I6WB89	A0A8I6WB89_HORVV	VWFA domain-containing protein
A0A8I6WB91	A0A8I6WB91_HORVV	Protein kinase domain-containing protein
A0A8I6WB92	A0A8I6WB92_HORVV	ESF1
A0A8I6WB95	A0A8I6WB95_HORVV	YcaO domain-containing protein
A0A8I6WB98	A0A8I6WB98_HORVV	Cysteine-rich receptor-like protein kinase 25
A0A8I6WB99	A0A8I6WB99_HORVV	FH2 domain-containing protein
A0A8I6WBA2	A0A8I6WBA2_HORVV	Exostosin domain-containing protein
A0A8I6WBA6	A0A8I6WBA6_HORVV	THO complex subunit 7 homolog
A0A8I6WBC0	A0A8I6WBC0_HORVV	Protein kinase domain-containing protein
A0A8I6WBC4	A0A8I6WBC4_HORVV	Lecithin-cholesterol acyltransferase-like 1
A0A8I6WBC6	A0A8I6WBC6_HORVV	Pentatricopeptide repeat-containing protein PNM1, mitochondrial
A0A8I6WBD3	A0A8I6WBD3_HORVV	PMD domain-containing protein
A0A8I6WBD7	A0A8I6WBD7_HORVV	Ribosome biogenesis protein WDR12 homolog
A0A8I6WBE1	A0A8I6WBE1_HORVV	YcaO domain-containing protein
A0A8I6WBE3	A0A8I6WBE3_HORVV	Fn3_like domain-containing protein
A0A8I6WBE8	A0A8I6WBE8_HORVV	Disease resistance protein RPM1
A0A8I6WBF1	A0A8I6WBF1_HORVV	Benzyl alcohol O-benzoyltransferase
A0A8I6WBF3	A0A8I6WBF3_HORVV	F-box domain-containing protein
A0A8I6WBF5	A0A8I6WBF5_HORVV	Head decoration protein D
A0A8I6WBG2	A0A8I6WBG2_HORVV	Subtilisin-chymotrypsin inhibitor-2A
A0A8I6WBG4	A0A8I6WBG4_HORVV	Protein kinase domain-containing protein
A0A8I6WBH0	A0A8I6WBH0_HORVV	WPP domain-containing protein
A0A8I6WBH4	A0A8I6WBH4_HORVV	CASP-like protein
A0A8I6WBH5	A0A8I6WBH5_HORVV	TF-B3 domain-containing protein
A0A8I6WBI1	A0A8I6WBI1_HORVV	Pentatricopeptide repeat-containing protein
A0A8I6WBI2	A0A8I6WBI2_HORVV	3'-5' exonuclease domain-containing protein
A0A8I6WBI5	A0A8I6WBI5_HORVV	DUF295 domain-containing protein
A0A8I6WBI6	A0A8I6WBI6_HORVV	NAM-associated domain-containing protein
A0A8I6WBJ1	A0A8I6WBJ1_HORVV	RRM domain-containing protein
A0A8I6WBJ6	A0A8I6WBJ6_HORVV	NAC domain-containing protein
A0A8I6WBJ8	A0A8I6WBJ8_HORVV	Secreted protein
A0A8I6WBK6	A0A8I6WBK6_HORVV	Glycosyltransferase
A0A8I6WBL2	A0A8I6WBL2_HORVV	CULLIN_2 domain-containing protein
A0A8I6WBL3	A0A8I6WBL3_HORVV	RING-type domain-containing protein
A0A8I6WBL4	A0A8I6WBL4_HORVV	MFS domain-containing protein
A0A8I6WBM4	A0A8I6WBM4_HORVV	Villin-1
A0A8I6WBM5	A0A8I6WBM5_HORVV	YcaO domain-containing protein
A0A8I6WBM8	A0A8I6WBM8_HORVV	Cas1_AcylT domain-containing protein
A0A8I6WBN1	A0A8I6WBN1_HORVV	ORF59
A0A8I6WBN2	A0A8I6WBN2_HORVV	CYTOSOL_AP domain-containing protein
A0A8I6WBN6	A0A8I6WBN6_HORVV	SWIRM-assoc_1 domain-containing protein
A0A8I6WBN7	A0A8I6WBN7_HORVV	NAM-associated domain-containing protein
A0A8I6WBP0	A0A8I6WBP0_HORVV	Mixed-linked glucan synthase 7
A0A8I6WBP6	A0A8I6WBP6_HORVV	Adenylyl-sulfate kinase
A0A8I6WBP7	A0A8I6WBP7_HORVV	GH10 domain-containing protein
A0A8I6WBQ4	A0A8I6WBQ4_HORVV	Genome assembly, chromosome: II
A0A8I6WBQ8	A0A8I6WBQ8_HORVV	DUF1754-domain-containing protein
A0A8I6WBQ9	A0A8I6WBQ9_HORVV	NAM-associated domain-containing protein
A0A8I6WBR3	A0A8I6WBR3_HORVV	Chaperonin-like RbcX
A0A8I6WBR4	A0A8I6WBR4_HORVV	Acyl-coenzyme A oxidase 4, peroxisomal
A0A8I6WBR8	A0A8I6WBR8_HORVV	Anaphase-promoting complex subunit 13
A0A8I6WBT1	A0A8I6WBT1_HORVV	Protein kinase domain-containing protein
A0A8I6WBT6	A0A8I6WBT6_HORVV	VOC domain-containing protein
A0A8I6WBT9	A0A8I6WBT9_HORVV	PB1 domain-containing protein
A0A8I6WBU2	A0A8I6WBU2_HORVV	ATP-dependent DNA helicase
A0A8I6WBU4	A0A8I6WBU4_HORVV	AB hydrolase-1 domain-containing protein
A0A8I6WBU7	A0A8I6WBU7_HORVV	Uncharacterized protein
A0A8I6WBU9	A0A8I6WBU9_HORVV	Protein transport protein Sec61 subunit gamma
A0A8I6WBV7	A0A8I6WBV7_HORVV	UBC core domain-containing protein
A0A8I6WBW4	A0A8I6WBW4_HORVV	Peroxidase
A0A8I6WBW5	A0A8I6WBW5_HORVV	Uncharacterized protein
A0A8I6WBX0	A0A8I6WBX0_HORVV	Genome assembly, chromosome: II
A0A8I6WBX6	A0A8I6WBX6_HORVV	Myosin-2
A0A8I6WBY1	A0A8I6WBY1_HORVV	Uncharacterized protein
A0A8I6WBY3	A0A8I6WBY3_HORVV	Protein ORF59
A0A8I6WBY9	A0A8I6WBY9_HORVV	ORF75
A0A8I6WBZ2	A0A8I6WBZ2_HORVV	YcaO domain-containing protein
A0A8I6WBZ7	A0A8I6WBZ7_HORVV	Carrier domain-containing protein
A0A8I6WC01	A0A8I6WC01_HORVV	Lysine-specific demethylase JMJ25
A0A8I6WC04	A0A8I6WC04_HORVV	PlsC domain-containing protein
A0A8I6WC08	A0A8I6WC08_HORVV	AN1-type domain-containing protein
A0A8I6WC09	A0A8I6WC09_HORVV	MI domain-containing protein
A0A8I6WC10	A0A8I6WC10_HORVV	zf-RVT domain-containing protein
A0A8I6WC13	A0A8I6WC13_HORVV	Ubiquitin carboxyl-terminal hydrolase
A0A8I6WC18	A0A8I6WC18_HORVV	Cyclin N-terminal domain-containing protein
A0A8I6WC25	A0A8I6WC25_HORVV	Coiled-coil domain-containing protein 167
A0A8I6WC28	A0A8I6WC28_HORVV	Reverse transcriptase domain-containing protein
A0A8I6WC34	A0A8I6WC34_HORVV	F-box domain-containing protein
A0A8I6WC38	A0A8I6WC38_HORVV	Non-specific serine/threonine protein kinase
A0A8I6WC42	A0A8I6WC42_HORVV	GRF-type domain-containing protein
A0A8I6WC46	A0A8I6WC46_HORVV	zf-RVT domain-containing protein
A0A8I6WC48	A0A8I6WC48_HORVV	YcaO domain-containing protein
A0A8I6WC50	A0A8I6WC50_HORVV	YcaO domain-containing protein
A0A8I6WC60	A0A8I6WC60_HORVV	Shugoshin_C domain-containing protein
A0A8I6WC61	A0A8I6WC61_HORVV	Protein kinase domain-containing protein
A0A8I6WC69	A0A8I6WC69_HORVV	Genome assembly, chromosome: II
A0A8I6WC73	A0A8I6WC73_HORVV	LisH domain-containing protein
A0A8I6WC76	A0A8I6WC76_HORVV	Cysteine-rich receptor-like protein kinase 10
A0A8I6WC83	A0A8I6WC83_HORVV	Uncharacterized protein
A0A8I6WC84	A0A8I6WC84_HORVV	YcaO domain-containing protein
A0A8I6WC86	A0A8I6WC86_HORVV	Peptidase A1 domain-containing protein
A0A8I6WC87	A0A8I6WC87_HORVV	Aldehyde oxygenase (deformylating)
A0A8I6WCA0	A0A8I6WCA0_HORVV	Rab-GAP TBC domain-containing protein
A0A8I6WCB3	A0A8I6WCB3_HORVV	Double-stranded RNA-binding protein 2-like
A0A8I6WCB5	A0A8I6WCB5_HORVV	Coatomer subunit gamma
A0A8I6WCC1	A0A8I6WCC1_HORVV	YcaO domain-containing protein
A0A8I6WCD6	A0A8I6WCD6_HORVV	NAM-associated domain-containing protein
A0A8I6WCE0	A0A8I6WCE0_HORVV	DUF4371 domain-containing protein
A0A8I6WCE7	A0A8I6WCE7_HORVV	Secreted protein
A0A8I6WCE8	A0A8I6WCE8_HORVV	Peroxisomal membrane protein PEX14
A0A8I6WCF5	A0A8I6WCF5_HORVV	LRRNT_2 domain-containing protein
A0A8I6WCG4	A0A8I6WCG4_HORVV	LEA_2 domain-containing protein
A0A8I6WCG5	A0A8I6WCG5_HORVV	NB-ARC domain-containing protein
A0A8I6WCG6	A0A8I6WCG6_HORVV	Uncharacterized protein
A0A8I6WCG9	A0A8I6WCG9_HORVV	Uncharacterized protein
A0A8I6WCH2	A0A8I6WCH2_HORVV	PB1 domain-containing protein
A0A8I6WCH4	A0A8I6WCH4_HORVV	Cellulase domain-containing protein
A0A8I6WCH8	A0A8I6WCH8_HORVV	Reverse transcriptase domain-containing protein
A0A8I6WCI1	A0A8I6WCI1_HORVV	DJ-1_PfpI domain-containing protein
A0A8I6WCI2	A0A8I6WCI2_HORVV	N-acetyltransferase domain-containing protein
A0A8I6WCI4	A0A8I6WCI4_HORVV	UPF0481 protein
A0A8I6WCJ2	A0A8I6WCJ2_HORVV	Protein ORF59
A0A8I6WCJ6	A0A8I6WCJ6_HORVV	Protein kinase domain-containing protein
A0A8I6WCJ7	A0A8I6WCJ7_HORVV	TauD domain-containing protein
A0A8I6WCK5	A0A8I6WCK5_HORVV	Methyltransf_2 domain-containing protein
A0A8I6WCL0	A0A8I6WCL0_HORVV	Phosphatidate cytidylyltransferase
A0A8I6WCL2	A0A8I6WCL2_HORVV	RRM domain-containing protein
A0A8I6WCL8	A0A8I6WCL8_HORVV	F-box domain-containing protein
A0A8I6WCM3	A0A8I6WCM3_HORVV	Auxin-responsive protein SAUR32
A0A8I6WCM4	A0A8I6WCM4_HORVV	LRRNT_2 domain-containing protein
A0A8I6WCM6	A0A8I6WCM6_HORVV	Basic proline-rich protein
A0A8I6WCM8	A0A8I6WCM8_HORVV	PAP_fibrillin domain-containing protein
A0A8I6WCM9	A0A8I6WCM9_HORVV	Zinc finger protein
A0A8I6WCN2	A0A8I6WCN2_HORVV	Protein kinase domain-containing protein
A0A8I6WCN6	A0A8I6WCN6_HORVV	Vegetative cell wall protein gp1-like
A0A8I6WCP0	A0A8I6WCP0_HORVV	Rab3 GTPase-activating protein catalytic subunit
A0A8I6WCP1	A0A8I6WCP1_HORVV	Disease resistance protein RPM1
A0A8I6WCP5	A0A8I6WCP5_HORVV	ADF-H domain-containing protein
A0A8I6WCP7	A0A8I6WCP7_HORVV	Dof-type domain-containing protein
A0A8I6WCQ1	A0A8I6WCQ1_HORVV	DUF2523 domain-containing protein
A0A8I6WCQ3	A0A8I6WCQ3_HORVV	MFS domain-containing protein
A0A8I6WCQ6	A0A8I6WCQ6_HORVV	AP2/ERF domain-containing protein
A0A8I6WCQ7	A0A8I6WCQ7_HORVV	Transcription initiation factor IIA subunit 2
A0A8I6WCR3	A0A8I6WCR3_HORVV	ANK_REP_REGION domain-containing protein
A0A8I6WCR4	A0A8I6WCR4_HORVV	28S ribosomal protein S36, mitochondrial
A0A8I6WCR8	A0A8I6WCR8_HORVV	YcaO domain-containing protein
A0A8I6WCR9	A0A8I6WCR9_HORVV	Glutathione transferase
A0A8I6WCS5	A0A8I6WCS5_HORVV	YcaO domain-containing protein
A0A8I6WCS7	A0A8I6WCS7_HORVV	Retrotransposon protein, putative, unclassified
A0A8I6WCS9	A0A8I6WCS9_HORVV	Uncharacterized protein
A0A8I6WCT7	A0A8I6WCT7_HORVV	Protein kinase domain-containing protein
A0A8I6WCT9	A0A8I6WCT9_HORVV	Malectin_like domain-containing protein
A0A8I6WCU2	A0A8I6WCU2_HORVV	2OG-FeII_Oxy domain-containing protein
A0A8I6WCU4	A0A8I6WCU4_HORVV	Peroxidase
A0A8I6WCU8	A0A8I6WCU8_HORVV	Outer envelope pore protein 16-2, chloroplastic
A0A8I6WCU9	A0A8I6WCU9_HORVV	J domain-containing protein
A0A8I6WCV3	A0A8I6WCV3_HORVV	AP2/ERF domain-containing protein
A0A8I6WCV5	A0A8I6WCV5_HORVV	Inositol-tetrakisphosphate 1-kinase
A0A8I6WCW1	A0A8I6WCW1_HORVV	Genome assembly, chromosome: II
A0A8I6WCW4	A0A8I6WCW4_HORVV	CSC1-like protein
A0A8I6WCX1	A0A8I6WCX1_HORVV	Cupin_3 domain-containing protein
A0A8I6WCX2	A0A8I6WCX2_HORVV	Histone-lysine N-methyltransferase family member SUVH9
A0A8I6WCX3	A0A8I6WCX3_HORVV	Inorganic diphosphatase
A0A8I6WCX4	A0A8I6WCX4_HORVV	Retrotransposon protein, putative, unclassified
A0A8I6WCY0	A0A8I6WCY0_HORVV	RRM domain-containing protein
A0A8I6WCY3	A0A8I6WCY3_HORVV	Transcription factor MYB2
A0A8I6WCY4	A0A8I6WCY4_HORVV	Genome assembly, chromosome: II
A0A8I6WCY7	A0A8I6WCY7_HORVV	SNARE associated Golgi protein
A0A8I6WCZ1	A0A8I6WCZ1_HORVV	RNase H type-1 domain-containing protein
A0A8I6WCZ3	A0A8I6WCZ3_HORVV	NAM-associated domain-containing protein
A0A8I6WCZ6	A0A8I6WCZ6_HORVV	Transmembrane protein
A0A8I6WCZ9	A0A8I6WCZ9_HORVV	Methyltransferase
A0A8I6WD00	A0A8I6WD00_HORVV	YcaO domain-containing protein
A0A8I6WD02	A0A8I6WD02_HORVV	Rhodanese domain-containing protein
A0A8I6WD05	A0A8I6WD05_HORVV	C2 NT-type domain-containing protein
A0A8I6WD10	A0A8I6WD10_HORVV	GRF-type domain-containing protein
A0A8I6WD13	A0A8I6WD13_HORVV	GRAS domain-containing protein
A0A8I6WD16	A0A8I6WD16_HORVV	ULP_PROTEASE domain-containing protein
A0A8I6WD24	A0A8I6WD24_HORVV	Protein NRT1/ PTR FAMILY 6.3
A0A8I6WD25	A0A8I6WD25_HORVV	Beta-hexosaminidase
A0A8I6WD31	A0A8I6WD31_HORVV	Tobamovirus multiplication protein 2B
A0A8I6WD35	A0A8I6WD35_HORVV	Fluoride ion transporter CrcB
A0A8I6WD40	A0A8I6WD40_HORVV	Cyclin
A0A8I6WD43	A0A8I6WD43_HORVV	Alginate_lyase2 domain-containing protein
A0A8I6WD45	A0A8I6WD45_HORVV	CCHC-type domain-containing protein
A0A8I6WD49	A0A8I6WD49_HORVV	Transcription factor MYB59
A0A8I6WD52	A0A8I6WD52_HORVV	Homeobox domain-containing protein
A0A8I6WD55	A0A8I6WD55_HORVV	PH domain-containing protein
A0A8I6WD59	A0A8I6WD59_HORVV	Small RNA 2'-O-methyltransferase
A0A8I6WD60	A0A8I6WD60_HORVV	RNA helicase
A0A8I6WD63	A0A8I6WD63_HORVV	Late embryogenesis abundant protein
A0A8I6WD66	A0A8I6WD66_HORVV	GRF-type domain-containing protein
A0A8I6WD69	A0A8I6WD69_HORVV	GCK domain-containing protein
A0A8I6WD75	A0A8I6WD75_HORVV	Potassium transporter
A0A8I6WD76	A0A8I6WD76_HORVV	Gal_mutarotas_2 domain-containing protein
A0A8I6WD77	A0A8I6WD77_HORVV	PMD domain-containing protein
A0A8I6WD80	A0A8I6WD80_HORVV	PCRF domain-containing protein
A0A8I6WD82	A0A8I6WD82_HORVV	ATP-dependent DNA helicase
A0A8I6WD92	A0A8I6WD92_HORVV	TTF-type domain-containing protein
A0A8I6WD99	A0A8I6WD99_HORVV	4-hydroxy-7-methoxy-3-oxo-3,4-dihydro-2H-1,4-benzoxazin-2-yl glucosidebeta-D-glucosidase
A0A8I6WDA1	A0A8I6WDA1_HORVV	DYW_deaminase domain-containing protein
A0A8I6WDA2	A0A8I6WDA2_HORVV	CAP-Gly domain-containing protein
A0A8I6WDA5	A0A8I6WDA5_HORVV	Phospholipase
A0A8I6WDA7	A0A8I6WDA7_HORVV	NB-ARC domain-containing protein
A0A8I6WDB4	A0A8I6WDB4_HORVV	Metallothionein-like protein 1
A0A8I6WDB8	A0A8I6WDB8_HORVV	Chlorophyll synthase, chloroplastic
A0A8I6WDB9	A0A8I6WDB9_HORVV	YcaO domain-containing protein
A0A8I6WDC0	A0A8I6WDC0_HORVV	C2H2-type domain-containing protein
A0A8I6WDC8	A0A8I6WDC8_HORVV	Ig-like domain-containing protein
A0A8I6WDD1	A0A8I6WDD1_HORVV	DUF538 domain-containing protein
A0A8I6WDD2	A0A8I6WDD2_HORVV	Protein kinase domain-containing protein
A0A8I6WDD4	A0A8I6WDD4_HORVV	RING-type domain-containing protein
A0A8I6WDE4	A0A8I6WDE4_HORVV	L-gulonolactone oxidase
A0A8I6WDE5	A0A8I6WDE5_HORVV	Protein kinase domain-containing protein
A0A8I6WDE6	A0A8I6WDE6_HORVV	Protein FAR1-RELATED SEQUENCE
A0A8I6WDE7	A0A8I6WDE7_HORVV	Homeobox protein rough sheath 1
A0A8I6WDF1	A0A8I6WDF1_HORVV	Disease resistance protein RGA3
A0A8I6WDF2	A0A8I6WDF2_HORVV	Membrane protein YjcL
A0A8I6WDF5	A0A8I6WDF5_HORVV	Ovate family protein
A0A8I6WDF7	A0A8I6WDF7_HORVV	Sister chromatid cohesion 1 protein 1
A0A8I6WDF8	A0A8I6WDF8_HORVV	Dirigent protein
A0A8I6WDF9	A0A8I6WDF9_HORVV	GDSL esterase/lipase
A0A8I6WDG5	A0A8I6WDG5_HORVV	Genome assembly, chromosome: II
A0A8I6WDG7	A0A8I6WDG7_HORVV	Twin-arginine translocase subunit TatC
A0A8I6WDG9	A0A8I6WDG9_HORVV	AAI domain-containing protein
A0A8I6WDH0	A0A8I6WDH0_HORVV	YcaO domain-containing protein
A0A8I6WDH1	A0A8I6WDH1_HORVV	PPR_long domain-containing protein
A0A8I6WDH4	A0A8I6WDH4_HORVV	FAF domain-containing protein
A0A8I6WDH5	A0A8I6WDH5_HORVV	Jacalin-type lectin domain-containing protein
A0A8I6WDH6	A0A8I6WDH6_HORVV	F-box domain-containing protein
A0A8I6WDH7	A0A8I6WDH7_HORVV	TPR_REGION domain-containing protein
A0A8I6WDH9	A0A8I6WDH9_HORVV	Anther-specific proline-rich protein APG-like
A0A8I6WDI3	A0A8I6WDI3_HORVV	Craniofacial development protein 2-like
A0A8I6WDI5	A0A8I6WDI5_HORVV	Pollen-specific leucine-rich repeat extensin-like protein 1
A0A8I6WDI9	A0A8I6WDI9_HORVV	Non-specific serine/threonine protein kinase
A0A8I6WDJ1	A0A8I6WDJ1_HORVV	Subtilisin-chymotrypsin inhibitor-2A
A0A8I6WDJ3	A0A8I6WDJ3_HORVV	Uncharacterized protein
A0A8I6WDJ7	A0A8I6WDJ7_HORVV	NB-ARC domain-containing protein
A0A8I6WDJ8	A0A8I6WDJ8_HORVV	Glutathione transferase
A0A8I6WDJ9	A0A8I6WDJ9_HORVV	AB hydrolase-1 domain-containing protein
A0A8I6WDK1	A0A8I6WDK1_HORVV	Reverse transcriptase domain-containing protein
A0A8I6WDK7	A0A8I6WDK7_HORVV	Tetraspanin-3
A0A8I6WDL0	A0A8I6WDL0_HORVV	Rx_N domain-containing protein
A0A8I6WDL1	A0A8I6WDL1_HORVV	HMA domain-containing protein
A0A8I6WDL2	A0A8I6WDL2_HORVV	zf-RVT domain-containing protein
A0A8I6WDL3	A0A8I6WDL3_HORVV	AAI domain-containing protein
A0A8I6WDL9	A0A8I6WDL9_HORVV	Protein EMBRYO SAC DEVELOPMENT ARREST 3, chloroplastic
A0A8I6WDM0	A0A8I6WDM0_HORVV	BOWMAN_BIRK domain-containing protein
A0A8I6WDM4	A0A8I6WDM4_HORVV	Alanine transaminase
A0A8I6WDM6	A0A8I6WDM6_HORVV	RRM domain-containing protein
A0A8I6WDM8	A0A8I6WDM8_HORVV	ENTH domain-containing protein
A0A8I6WDN1	A0A8I6WDN1_HORVV	Str_synth domain-containing protein
A0A8I6WDN2	A0A8I6WDN2_HORVV	Serine/arginine repetitive matrix protein 1-like
A0A8I6WDN5	A0A8I6WDN5_HORVV	SANT domain-containing protein
A0A8I6WDP0	A0A8I6WDP0_HORVV	RNase H type-1 domain-containing protein
A0A8I6WDP2	A0A8I6WDP2_HORVV	Uncharacterized protein
A0A8I6WDP3	A0A8I6WDP3_HORVV	Glutathione transferase
A0A8I6WDP6	A0A8I6WDP6_HORVV	Myb-like domain-containing protein
A0A8I6WDP8	A0A8I6WDP8_HORVV	GRAS domain-containing protein
A0A8I6WDP9	A0A8I6WDP9_HORVV	WW domain-containing protein
A0A8I6WDQ1	A0A8I6WDQ1_HORVV	Peroxidase
A0A8I6WDQ6	A0A8I6WDQ6_HORVV	Bulb-type lectin domain-containing protein
A0A8I6WDQ7	A0A8I6WDQ7_HORVV	F-box domain-containing protein
A0A8I6WDQ9	A0A8I6WDQ9_HORVV	Ribosomal protein L11 methyltransferase
A0A8I6WDR0	A0A8I6WDR0_HORVV	Flavoprotein domain-containing protein
A0A8I6WDR5	A0A8I6WDR5_HORVV	Senescence regulator S40
A0A8I6WDR6	A0A8I6WDR6_HORVV	AP2/ERF domain-containing protein
A0A8I6WDR7	A0A8I6WDR7_HORVV	Genome assembly, chromosome: II
A0A8I6WDR8	A0A8I6WDR8_HORVV	Phosphoglycerate kinase
A0A8I6WDS1	A0A8I6WDS1_HORVV	Coiled-coil domain-containing protein 16
A0A8I6WDS2	A0A8I6WDS2_HORVV	Long-chain-fatty-acid--CoA ligase
A0A8I6WDS6	A0A8I6WDS6_HORVV	LisH domain-containing protein
A0A8I6WDT2	A0A8I6WDT2_HORVV	Uncharacterized protein
A0A8I6WDT3	A0A8I6WDT3_HORVV	Branched-chain-amino-acid aminotransferase
A0A8I6WDT5	A0A8I6WDT5_HORVV	FAS1 domain-containing protein
A0A8I6WDT9	A0A8I6WDT9_HORVV	YcaO domain-containing protein
A0A8I6WDU0	A0A8I6WDU0_HORVV	Uncharacterized protein
A0A8I6WDU2	A0A8I6WDU2_HORVV	Rx_N domain-containing protein
A0A8I6WDU6	A0A8I6WDU6_HORVV	IPPc domain-containing protein
A0A8I6WDV2	A0A8I6WDV2_HORVV	Transposase_23 domain-containing protein
A0A8I6WDV3	A0A8I6WDV3_HORVV	Reverse transcriptase domain-containing protein
A0A8I6WDV4	A0A8I6WDV4_HORVV	Uncharacterized protein
A0A8I6WDV5	A0A8I6WDV5_HORVV	Porphobilinogen synthase
A0A8I6WDV9	A0A8I6WDV9_HORVV	Histone H3
A0A8I6WDW1	A0A8I6WDW1_HORVV	DUF4220 domain-containing protein
A0A8I6WDW4	A0A8I6WDW4_HORVV	WRKY domain-containing protein
A0A8I6WDW5	A0A8I6WDW5_HORVV	Retrotransposon protein, putative, unclassified
A0A8I6WDW6	A0A8I6WDW6_HORVV	RNase H type-1 domain-containing protein
A0A8I6WDX3	A0A8I6WDX3_HORVV	Exocyst subunit Exo70 family protein
A0A8I6WDX5	A0A8I6WDX5_HORVV	NADH-ubiquinone oxidoreductase chain 3
A0A8I6WDX6	A0A8I6WDX6_HORVV	Drought-responsive family protein
A0A8I6WDX9	A0A8I6WDX9_HORVV	Omp85 domain-containing protein
A0A8I6WDY1	A0A8I6WDY1_HORVV	Fe2OG dioxygenase domain-containing protein
A0A8I6WDY4	A0A8I6WDY4_HORVV	DUF663 domain-containing protein
A0A8I6WDY7	A0A8I6WDY7_HORVV	SelT-like protein
A0A8I6WDY9	A0A8I6WDY9_HORVV	Beta-galactosidase
A0A8I6WDZ3	A0A8I6WDZ3_HORVV	Uncharacterized protein
A0A8I6WDZ5	A0A8I6WDZ5_HORVV	SERPIN domain-containing protein
A0A8I6WE01	A0A8I6WE01_HORVV	DUF4005 domain-containing protein
A0A8I6WE03	A0A8I6WE03_HORVV	Ovule protein
A0A8I6WE05	A0A8I6WE05_HORVV	Uncharacterized protein
A0A8I6WE07	A0A8I6WE07_HORVV	Protein ORF59
A0A8I6WE08	A0A8I6WE08_HORVV	Teneurin N-terminal domain-containing protein
A0A8I6WE15	A0A8I6WE15_HORVV	RNase H type-1 domain-containing protein
A0A8I6WE16	A0A8I6WE16_HORVV	GRAS domain-containing protein
A0A8I6WE20	A0A8I6WE20_HORVV	NAM-associated domain-containing protein
A0A8I6WE21	A0A8I6WE21_HORVV	O-fucosyltransferase family protein
A0A8I6WE23	A0A8I6WE23_HORVV	Myb_DNA-bind_3 domain-containing protein
A0A8I6WE26	A0A8I6WE26_HORVV	zf-XS domain-containing protein
A0A8I6WE31	A0A8I6WE31_HORVV	Mitochondrial glycoprotein
A0A8I6WE33	A0A8I6WE33_HORVV	Chalcone synthase
A0A8I6WE36	A0A8I6WE36_HORVV	Transposase
A0A8I6WE38	A0A8I6WE38_HORVV	Uncharacterized protein
A0A8I6WE40	A0A8I6WE40_HORVV	Yos1-like protein
A0A8I6WE42	A0A8I6WE42_HORVV	YcaO domain-containing protein
A0A8I6WE43	A0A8I6WE43_HORVV	Receptor-like serine/threonine-protein kinase
A0A8I6WE46	A0A8I6WE46_HORVV	Myb_DNA-bind_3 domain-containing protein
A0A8I6WE50	A0A8I6WE50_HORVV	Solute carrier family 35 member F1
A0A8I6WE52	A0A8I6WE52_HORVV	Metallothionein
A0A8I6WE58	A0A8I6WE58_HORVV	RNase H type-1 domain-containing protein
A0A8I6WE61	A0A8I6WE61_HORVV	Uncharacterized protein
A0A8I6WE66	A0A8I6WE66_HORVV	Uncharacterized protein
A0A8I6WE67	A0A8I6WE67_HORVV	Glutathione transferase
A0A8I6WE74	A0A8I6WE74_HORVV	Transmembrane protein
A0A8I6WE76	A0A8I6WE76_HORVV	Zf-RVT domain-containing protein
A0A8I6WE77	A0A8I6WE77_HORVV	Uncharacterized protein
A0A8I6WE81	A0A8I6WE81_HORVV	Protein kinase domain-containing protein
A0A8I6WE83	A0A8I6WE83_HORVV	CRAL-TRIO domain-containing protein
A0A8I6WE85	A0A8I6WE85_HORVV	PWWP domain-containing protein
A0A8I6WE90	A0A8I6WE90_HORVV	Uncharacterized protein
A0A8I6WE92	A0A8I6WE92_HORVV	YcaO domain-containing protein
A0A8I6WE99	A0A8I6WE99_HORVV	Starch synthase IIIb-1
A0A8I6WEA2	A0A8I6WEA2_HORVV	RING-type domain-containing protein
A0A8I6WEA5	A0A8I6WEA5_HORVV	Remorin_C domain-containing protein
A0A8I6WEA7	A0A8I6WEA7_HORVV	Integral membrane protein
A0A8I6WEB0	A0A8I6WEB0_HORVV	Uncharacterized protein
A0A8I6WEB4	A0A8I6WEB4_HORVV	Transcription repressor
A0A8I6WEB7	A0A8I6WEB7_HORVV	DUF4220 domain-containing protein
A0A8I6WEB8	A0A8I6WEB8_HORVV	O-methyltransferase ZRP4
A0A8I6WEC0	A0A8I6WEC0_HORVV	Phenylalanine ammonia-lyase
A0A8I6WEC4	A0A8I6WEC4_HORVV	C2 domain-containing protein
A0A8I6WEC8	A0A8I6WEC8_HORVV	Uncharacterized protein
A0A8I6WEC9	A0A8I6WEC9_HORVV	Reverse transcriptase domain-containing protein
A0A8I6WED3	A0A8I6WED3_HORVV	Protein FAR1-RELATED SEQUENCE
A0A8I6WED8	A0A8I6WED8_HORVV	Tyrosine/DOPA decarboxylase 2
A0A8I6WED9	A0A8I6WED9_HORVV	DDE-1 domain-containing protein
A0A8I6WEE0	A0A8I6WEE0_HORVV	60S ribosomal protein L29
A0A8I6WEE4	A0A8I6WEE4_HORVV	HGSNAT_cat domain-containing protein
A0A8I6WEE6	A0A8I6WEE6_HORVV	Pentatricopeptide repeat-containing protein
A0A8I6WEE8	A0A8I6WEE8_HORVV	DDE Tnp4 domain-containing protein
A0A8I6WEF0	A0A8I6WEF0_HORVV	BHLH domain-containing protein
A0A8I6WEF4	A0A8I6WEF4_HORVV	Tubulin gamma chain
A0A8I6WEF5	A0A8I6WEF5_HORVV	BTB/POZ and MATH domain-containing protein 1-like
A0A8I6WEF7	A0A8I6WEF7_HORVV	ENT domain-containing protein
A0A8I6WEF8	A0A8I6WEF8_HORVV	YcaO domain-containing protein
A0A8I6WEG6	A0A8I6WEG6_HORVV	DUF295 domain-containing protein
A0A8I6WEG8	A0A8I6WEG8_HORVV	SAM domain-containing protein
A0A8I6WEH2	A0A8I6WEH2_HORVV	Dihydrolipoyl dehydrogenase
A0A8I6WEH3	A0A8I6WEH3_HORVV	Transmembrane protein
A0A8I6WEH5	A0A8I6WEH5_HORVV	Uncharacterized protein
A0A8I6WEH7	A0A8I6WEH7_HORVV	YcaO domain-containing protein
A0A8I6WEH9	A0A8I6WEH9_HORVV	F-box domain-containing protein
A0A8I6WEI3	A0A8I6WEI3_HORVV	Flap endonuclease 1
A0A8I6WEI4	A0A8I6WEI4_HORVV	Tr-type G domain-containing protein
A0A8I6WEJ0	A0A8I6WEJ0_HORVV	Retrotransposon protein, putative, unclassified
A0A8I6WEJ1	A0A8I6WEJ1_HORVV	WRKY domain-containing protein
A0A8I6WEJ9	A0A8I6WEJ9_HORVV	Nuclear pore complex protein
A0A8I6WEK0	A0A8I6WEK0_HORVV	Receptor-like serine/threonine-protein kinase
A0A8I6WEK2	A0A8I6WEK2_HORVV	V-type proton ATPase subunit a
A0A8I6WEK9	A0A8I6WEK9_HORVV	Centroradialis
A0A8I6WEL0	A0A8I6WEL0_HORVV	SURP motif domain-containing protein
A0A8I6WEL2	A0A8I6WEL2_HORVV	Zinc transporter 6, chloroplastic
A0A8I6WEL5	A0A8I6WEL5_HORVV	CASP-like protein
A0A8I6WEL7	A0A8I6WEL7_HORVV	FAF domain-containing protein
A0A8I6WEL8	A0A8I6WEL8_HORVV	ENTH domain-containing protein
A0A8I6WEM2	A0A8I6WEM2_HORVV	Retrotransposon protein, putative, unclassified
A0A8I6WEM3	A0A8I6WEM3_HORVV	Protein kinase domain-containing protein
A0A8I6WEM5	A0A8I6WEM5_HORVV	Uncharacterized protein
A0A8I6WEM9	A0A8I6WEM9_HORVV	Frigida-LIKE protein
A0A8I6WEN1	A0A8I6WEN1_HORVV	Transcription repressor
A0A8I6WEN3	A0A8I6WEN3_HORVV	Phytocyanin domain-containing protein
A0A8I6WEN9	A0A8I6WEN9_HORVV	Glycosyltransferase
A0A8I6WEP1	A0A8I6WEP1_HORVV	Protein Muted homolog
A0A8I6WEP2	A0A8I6WEP2_HORVV	TPT domain-containing protein
A0A8I6WEP4	A0A8I6WEP4_HORVV	AAI domain-containing protein
A0A8I6WEP7	A0A8I6WEP7_HORVV	Protein FAR1-RELATED SEQUENCE
A0A8I6WEP8	A0A8I6WEP8_HORVV	Uncharacterized protein
A0A8I6WEQ3	A0A8I6WEQ3_HORVV	Seed biotin-containing protein SBP65-like
A0A8I6WEQ5	A0A8I6WEQ5_HORVV	TF-B3 domain-containing protein
A0A8I6WEQ8	A0A8I6WEQ8_HORVV	GPI-anchor transamidase
A0A8I6WEQ9	A0A8I6WEQ9_HORVV	WAT1-related protein
A0A8I6WER1	A0A8I6WER1_HORVV	Uncharacterized protein
A0A8I6WER2	A0A8I6WER2_HORVV	TTF-type domain-containing protein
A0A8I6WER6	A0A8I6WER6_HORVV	AAI domain-containing protein
A0A8I6WER7	A0A8I6WER7_HORVV	PfkB domain-containing protein
A0A8I6WER8	A0A8I6WER8_HORVV	F-box domain-containing protein
A0A8I6WES3	A0A8I6WES3_HORVV	CcmF_C domain-containing protein
A0A8I6WES9	A0A8I6WES9_HORVV	CID domain-containing protein
A0A8I6WET0	A0A8I6WET0_HORVV	Protein kinase domain-containing protein
A0A8I6WET5	A0A8I6WET5_HORVV	TTF-type domain-containing protein
A0A8I6WET7	A0A8I6WET7_HORVV	UBC core domain-containing protein
A0A8I6WEU0	A0A8I6WEU0_HORVV	C2H2-type domain-containing protein
A0A8I6WEU4	A0A8I6WEU4_HORVV	MsrB domain-containing protein
A0A8I6WEU5	A0A8I6WEU5_HORVV	RRM domain-containing protein
A0A8I6WEU6	A0A8I6WEU6_HORVV	Alkaline/neutral invertase
A0A8I6WEU9	A0A8I6WEU9_HORVV	ULP_PROTEASE domain-containing protein
A0A8I6WEV0	A0A8I6WEV0_HORVV	Pre-mRNA-splicing factor 38
A0A8I6WEV5	A0A8I6WEV5_HORVV	DUF4283 domain-containing protein
A0A8I6WEV6	A0A8I6WEV6_HORVV	FH2 domain-containing protein
A0A8I6WEV9	A0A8I6WEV9_HORVV	Histone-lysine N-methyltransferase ASHH2
A0A8I6WEW0	A0A8I6WEW0_HORVV	DUF547 domain-containing protein
A0A8I6WEW1	A0A8I6WEW1_HORVV	Uncharacterized protein
A0A8I6WEW3	A0A8I6WEW3_HORVV	G-patch domain-containing protein
A0A8I6WEW6	A0A8I6WEW6_HORVV	RNase H type-1 domain-containing protein
A0A8I6WEX1	A0A8I6WEX1_HORVV	Septin-type G domain-containing protein
A0A8I6WEX3	A0A8I6WEX3_HORVV	Exosome complex component RRP41 homolog
A0A8I6WEX4	A0A8I6WEX4_HORVV	Pentatricopeptide repeat-containing protein
A0A8I6WEY0	A0A8I6WEY0_HORVV	AIG1-type G domain-containing protein
A0A8I6WEY2	A0A8I6WEY2_HORVV	Protein Muted homolog
A0A8I6WEY3	A0A8I6WEY3_HORVV	FBD domain-containing protein
A0A8I6WEY4	A0A8I6WEY4_HORVV	Pirin
A0A8I6WEY5	A0A8I6WEY5_HORVV	Transmembrane protein
A0A8I6WEY7	A0A8I6WEY7_HORVV	Uncharacterized protein
A0A8I6WEY8	A0A8I6WEY8_HORVV	DUF4283 domain-containing protein
A0A8I6WEZ0	A0A8I6WEZ0_HORVV	Protein CLAVATA 3
A0A8I6WEZ2	A0A8I6WEZ2_HORVV	VDE domain-containing protein
A0A8I6WEZ3	A0A8I6WEZ3_HORVV	Peroxidase
A0A8I6WEZ6	A0A8I6WEZ6_HORVV	3'-5' exonuclease domain-containing protein
A0A8I6WEZ9	A0A8I6WEZ9_HORVV	Peroxidase
A0A8I6WF01	A0A8I6WF01_HORVV	GB1/RHD3-type G domain-containing protein
A0A8I6WF02	A0A8I6WF02_HORVV	CRM domain-containing protein
A0A8I6WF04	A0A8I6WF04_HORVV	Germin-like protein
A0A8I6WF07	A0A8I6WF07_HORVV	Terpene_synth_C domain-containing protein
A0A8I6WF10	A0A8I6WF10_HORVV	DUF4220 domain-containing protein
A0A8I6WF11	A0A8I6WF11_HORVV	Non-specific serine/threonine protein kinase
A0A8I6WF14	A0A8I6WF14_HORVV	Type IV secretion system protein VirD4
A0A8I6WF16	A0A8I6WF16_HORVV	zf-RVT domain-containing protein
A0A8I6WF18	A0A8I6WF18_HORVV	Sigma 1-type opioid receptor
A0A8I6WF19	A0A8I6WF19_HORVV	zf-RVT domain-containing protein
A0A8I6WF20	A0A8I6WF20_HORVV	Speckle-type POZ protein-like protein
A0A8I6WF21	A0A8I6WF21_HORVV	Uncharacterized protein
A0A8I6WF23	A0A8I6WF23_HORVV	WRKY domain-containing protein
A0A8I6WF24	A0A8I6WF24_HORVV	Glutamate decarboxylase
A0A8I6WF27	A0A8I6WF27_HORVV	zf-GRF domain-containing protein
A0A8I6WF31	A0A8I6WF31_HORVV	Stathmin
A0A8I6WF32	A0A8I6WF32_HORVV	Mitochondrial phosphate carrier protein 3, mitochondrial
[truncated: 32,530 more rows]

## Sheet: Gamma
Differentially expressed genes in plants after gamma-irradiation
GeneID	Base Mean	log2FC	StdErr	Wald-Stats	p-value	p-adj	Annotation
BaRT2v18chr1HG036030	64.8046	2.34014	0.370737	6.31214	2.75209e-10	4.94164e-06	Laccase
BaRT2v18chr6HG306790	109.416	2.01096	0.372392	5.40012	6.65966e-08	0.000199302	Leucine-rich repeat-like protein;Serine-threonine protein kinase, plant-type, putative;Putative leucine-rich repeat domain, L domain-containing protein;LRR receptor-like serine/threonine-protein kinase FLS2
BaRT2v18chr2HG108330	54.4509	2.00824	0.365594	5.49309	3.94969e-08	0.000141841	0
BaRT2v18chr3HG132390	131.997	1.8708	0.357248	5.23669	1.63481e-07	0.000419352	Germin-like protein 5-1;Cupin type-1 domain-containing protein
BaRT2v18chr3HG146700	142.116	1.86289	0.364122	5.11611	3.11902e-07	0.000700064	Orphans transcription factor;Calmodulin binding protein isoform 1
BaRT2v18chr2HG055100	60.258	1.83992	0.374256	4.91619	8.82429e-07	0.00158449	0
BaRT2v18chr3HG142760	74.4326	1.76917	0.374409	4.72523	2.29853e-06	0.00294803	0
BaRT2v18chr7HG363190	33.9433	1.71502	0.351288	4.88208	1.0497e-06	0.00161153	0
BaRT2v18chr3HG159360	50.2538	1.70993	0.373092	4.58313	4.58075e-06	0.00483835	protein PLASTID TRANSCRIPTIONALLY ACTIVE 10;S1 motif domain-containing protein;Nucleic acid-binding, OB-fold-like protein isoform 1
BaRT2v18chr1HG026150	556.417	1.63616	0.326435	5.0122	5.38119e-07	0.00107361	0
BaRT2v18chr1HG002230	70.3531	1.63089	0.374705	4.35247	1.34613e-05	0.00878836	Vignain
BaRT2v18chr3HG165550	12.7958	1.62992	0.374668	4.35029	1.35956e-05	0.00878836	0
BaRT2v18chr3HG159280	28.5781	1.60784	0.371834	4.32409	1.53163e-05	0.0089317	Tyrosine/DOPA decarboxylase 2;Aromatic amino acid decarboxylase
BaRT2v18chr7HG379410	42.7183	1.58756	0.37211	4.26638	1.98669e-05	0.00990918	Peroxidase
BaRT2v18chr5HG265560	65.1411	1.57708	0.374673	4.20922	2.56256e-05	0.0113444	0
BaRT2v18chr5HG271560	67.8653	1.57691	0.359673	4.3843	1.16362e-05	0.00878836	PAZ domain-containing protein
BaRT2v18chr7HG351350	169.923	1.56715	0.364352	4.3012	1.69878e-05	0.0092434	60S ribosomal protein L31
BaRT2v18chr2HG086470	111.408	1.55782	0.358238	4.34855	1.37043e-05	0.00878836	short-chain dehydrogenase cctT-like;NADPH-dependent 1-acyldihydroxyacetone phosphate reductase;11-beta-hydroxysteroid dehydrogenase-like 4B;NADPH-dependent 1-acyldihydroxyacetone phosphate reductase-like;short-chain dehydrogenase RED1;NAD(P)-binding rossmann-fold protein
BaRT2v18chr4HG203760	577.932	1.54848	0.331989	4.66425	3.09738e-06	0.00370777	High molecular mass early light-inducible protein HV58, chloroplastic
BaRT2v18chr5HG268570	203.711	1.53954	0.315673	4.87702	1.07699e-06	0.00161153	0
BaRT2v18chr6HG284110	29.1653	1.52817	0.374572	4.07977	4.50794e-05	0.0155862	Isoflavone reductase;NmrA domain-containing protein;Phenylcoumaran benzylic ether reductase
BaRT2v18chr2HG061030	41.5642	1.52438	0.371486	4.10347	4.07001e-05	0.0155862	0
BaRT2v18chr5HG252520	1061.43	1.52353	0.328221	4.6418	3.45393e-06	0.00387617	Heat shock protein 90-5, chloroplastic;Endoplasmin
BaRT2v18chr5HG257150	20.4194	1.52331	0.36545	4.16832	3.06851e-05	0.0131186	Trigger factor
BaRT2v18chr2HG058330	34.9166	1.52024	0.358091	4.2454	2.18204e-05	0.0103213	0
BaRT2v18chr4HG174880	46.0194	1.50011	0.342594	4.37868	1.19401e-05	0.00878836	40S ribosomal protein S25
BaRT2v18chr3HG143530	30.0299	1.49845	0.365676	4.09775	4.17186e-05	0.0155862	NAC domain-containing protein
BaRT2v18chr3HG145330	48.4387	1.49351	0.372587	4.00849	6.11076e-05	0.0179877	0
BaRT2v18chr1HG032480	31.3565	1.49303	0.37103	4.02401	5.72155e-05	0.0173424	Peroxidase
BaRT2v18chr6HG304290	42.8175	1.4869	0.342558	4.34059	1.42103e-05	0.00879862	NAM-associated domain-containing protein
BaRT2v18chr6HG324590	49.2639	1.48347	0.374542	3.96076	7.47122e-05	0.019684	rho-N domain-containing protein 1, chloroplastic-like;Rho-N domain-containing protein 1;Rho-N domain-containing protein 1 chloroplastic;Rho termination factor, N-terminal;SAP-like protein BP-73, putative, expressed
BaRT2v18chr2HG066670	14.9554	1.47447	0.36377	4.05329	5.05017e-05	0.0159089	IgA FC receptor (Fragment)
BaRT2v18chr7HG355430	15.338	1.47211	0.360804	4.08007	4.50226e-05	0.0155862	Rhamnogalacturonan endolyase
BaRT2v18chr1HG048960	20.2455	1.46905	0.372752	3.94109	8.11112e-05	0.0202282	0
BaRT2v18chr4HG204910	309.554	1.45511	0.357079	4.07505	4.60052e-05	0.0155862	Ubiquitin;Ubiquitin-60S ribosomal protein L40-1
BaRT2v18chr5HG268620	72.6692	1.45472	0.358806	4.05433	5.02776e-05	0.0159089	60S ribosomal protein L44;Ribosomal protein L44e
BaRT2v18chr6HG321270	185.548	1.45308	0.36589	3.97135	7.14658e-05	0.019684	0
BaRT2v18chr5HG274520	43.2148	1.44752	0.356788	4.0571	4.96868e-05	0.0159089	0
BaRT2v18chr5HG239780	52.3953	1.43769	0.374569	3.83826	0.000123908	0.0261752	Plastid transcriptionally active 6;50S ribosomal protein L19-1, chloroplastic (Fragment)
BaRT2v18chr7HG341270	65.6724	1.43649	0.372125	3.86022	0.000113283	0.0254263	0
BaRT2v18chrUnG388570	17.873	1.43193	0.372163	3.84759	0.000119285	0.0258712	0
BaRT2v18chr4HG219590	154.051	1.4269	0.327563	4.35611	1.32395e-05	0.00878836	0
BaRT2v18chr5HG221500	42.7289	1.42353	0.371853	3.82821	0.000129079	0.0266407	GTP-binding protein BRASSINAZOLE INSENSITIVE PALE GREEN 2, chloroplastic;G domain-containing protein;NO-associated protein 1, chloroplastic/mitochondrial;GTP binding domain
BaRT2v18chr2HG081030	350.668	1.41893	0.356167	3.9839	6.77944e-05	0.0193225	0
BaRT2v18chr7HG358420	423.957	1.41864	0.346309	4.09645	4.19539e-05	0.0155862	60S ribosomal protein L13
BaRT2v18chr4HG206240	58.4032	1.41739	0.359212	3.94585	7.95188e-05	0.0201104	CRAL/TRIO domain containing protein, expressed;CRAL-TRIO domain-containing protein;Random slug protein 5;Sec14p-like phosphatidylinositol transfer family protein isoform 1
BaRT2v18chr4HG210440	78.5959	1.41413	0.324675	4.35552	1.32751e-05	0.00878836	0
BaRT2v18chr5HG225490	15.3634	1.41097	0.365419	3.86124	0.000112814	0.0254263	0
BaRT2v18chr2HG070330	30.3839	1.4058	0.372895	3.76997	0.000163269	0.0302793	VAMP protein SEC22
BaRT2v18chr7HG364350	240.018	1.40348	0.362013	3.87688	0.000105803	0.0243565	GDSL esterase/lipase
BaRT2v18chr6HG299070	10.0854	1.39219	0.364329	3.82124	0.000132781	0.0270933	Glycerophosphodiester phosphodiesterase
BaRT2v18chr5HG254190	112.248	1.38848	0.368983	3.763	0.000167888	0.0304504	0
BaRT2v18chr7HG368730	501.889	1.38798	0.353247	3.92921	8.5225e-05	0.0206797	0
BaRT2v18chr1HG005570	200.66	1.38246	0.31388	4.40443	1.06063e-05	0.00878836	0
BaRT2v18chr1HG033630	259.868	1.38061	0.351834	3.92404	8.70767e-05	0.0208473	60S ribosomal protein L30;Large subunit ribosomal protein L30e
BaRT2v18chr3HG158010	526.116	1.3689	0.344643	3.97194	7.12888e-05	0.019684	Putative ribosomal protein S8;30S ribosomal protein S8, chloroplastic
BaRT2v18chr3HG141240	33.9509	1.36651	0.372816	3.66538	0.000246975	0.0389008	Aspartic proteinase oryzasin-1;Cathepsin D (Lysosomal aspartyl protease)
BaRT2v18chr6HG320720	19.0379	1.36648	0.361917	3.77568	0.000159573	0.0302793	Subtilisin-like protease
BaRT2v18chr4HG206760	12.5704	1.36404	0.365918	3.72773	0.000193214	0.0330414	0
BaRT2v18chr6HG303470	52.3679	1.36391	0.373501	3.65169	0.000260519	0.0401433	0
BaRT2v18chr5HG279850	51.2647	1.35956	0.372416	3.65066	0.000261571	0.0401433	0
BaRT2v18chr7HG336650	111.507	1.35774	0.357912	3.79349	0.000148548	0.0289515	0
BaRT2v18chr1HG044620	109.258	1.35011	0.315568	4.27837	1.88271e-05	0.00990918	pirin-like protein isoform X1;Pirin-like protein 2;Pirin
BaRT2v18chr5HG266050	289.546	1.34997	0.358488	3.76572	0.000166068	0.0304278	0
BaRT2v18chr3HG158290	144.735	1.33932	0.370381	3.61607	0.000299112	0.0440234	0
BaRT2v18chr1HG014270	185.367	1.33645	0.346975	3.85171	0.000117295	0.0258712	0
BaRT2v18chr5HG266730	21.1103	1.33497	0.372717	3.58173	0.000341331	0.0482593	SWIB domain-containing protein;Upstream activation factor subunit spp27 like;p53 negative regulator;Putative transcription regulator SWI/SNF-BAF60b family;SWIB/MDM2 domain
BaRT2v18chr2HG054760	282.899	1.33386	0.351836	3.79115	0.000149949	0.0289515	0
BaRT2v18chr3HG157600	64.6841	1.33262	0.347536	3.83449	0.000125825	0.0262712	Laccase
BaRT2v18chr7HG352120	86.6625	1.33062	0.330916	4.02101	5.79497e-05	0.0173424	transcription termination factor MTERF6, chloroplastic/mitochondrial;mTERF domain-containing protein (Fragment)
BaRT2v18chr3HG125110	12.8145	1.32862	0.362121	3.66899	0.000243508	0.0386941	Meiosis 5;Protodermal factor 1;Proline-and threonine-rich protein
BaRT2v18chr3HG143320	391.779	1.32481	0.35494	3.7325	0.000189591	0.0327336	0
BaRT2v18chr2HG091090	27.1967	1.32276	0.370962	3.56577	0.000362791	0.0504983	Phosphatidylinositol N-acetyglucosaminlytransferase subunit P-related
BaRT2v18chr6HG327620	119.137	1.32054	0.362539	3.64249	0.000270018	0.0410886	NB-ARC domain-containing protein
BaRT2v18chr2HG078600	24.8657	1.29649	0.358147	3.61999	0.000294616	0.0437201	Ribonuclease NW;Ribonuclease T(2);RNase NE
BaRT2v18chr1HG035940	375.765	1.28853	0.355473	3.62483	0.000289154	0.0432671	60S ribosomal protein L36
BaRT2v18chr4HG205580	768.518	1.27309	0.300303	4.23934	2.24176e-05	0.0103213	Allene oxide synthase
BaRT2v18chr4HG218550	139.896	1.2688	0.327078	3.87921	0.000104798	0.0243565	BHLH domain-containing protein;Transcription factor bHLH36
BaRT2v18chr2HG088250	68.5174	1.26448	0.287447	4.39899	1.08758e-05	0.00878836	0
BaRT2v18chr1HG008860	847.599	1.25524	0.291217	4.31033	1.63008e-05	0.00914679	Putative retroelement
BaRT2v18chr2HG080740	1048.62	1.25081	0.339313	3.68631	0.000227526	0.0374813	40S ribosomal protein S8
BaRT2v18chr4HG195150	405.182	1.23576	0.32783	3.76951	0.000163571	0.0302793	0
BaRT2v18chr2HG062780	60.8439	1.23246	0.311638	3.95478	7.66046e-05	0.019684	0
BaRT2v18chr2HG052720	81.2901	1.2317	0.329449	3.73867	0.000185	0.0322603	0
BaRT2v18chr7HG361220	774.443	1.21683	0.337093	3.60976	0.000306484	0.0447416	60S acidic ribosomal protein P0
BaRT2v18chr7HG376120	246.771	1.21674	0.310545	3.91807	8.92618e-05	0.0210893	Glutathione synthetase
BaRT2v18chr3HG148150	893.745	1.2053	0.329679	3.65597	0.000256209	0.0400043	8-amino-7-oxononanoate synthase-like;Aminotransferase, classes I and II family protein, expressed;Biotin F;Long chain base biosynthesis protein 2b;Serine C-palmitoyltransferase;8-amino-7-oxononanoate synthase
BaRT2v18chr1HG017980	223.081	1.20345	0.335209	3.59013	0.00033051	0.0471003	Cellulose synthase
BaRT2v18chr2HG077070	195.07	1.19953	0.311916	3.84567	0.000120224	0.0258712	putative deoxyribonuclease TATDN1;Putative exodeoxyribonuclease I;Deoxyribonuclease tatD
BaRT2v18chr4HG198110	337.69	1.17645	0.323616	3.63532	0.000277634	0.0418923	ATP-dependent Clp protease proteolytic subunit
BaRT2v18chr3HG149100	409.687	1.14677	0.289011	3.96792	7.25016e-05	0.019684	Cellulose synthase
BaRT2v18chr3HG141740	178.306	1.14674	0.272593	4.20678	2.59033e-05	0.0113444	0
BaRT2v18chr5HG237610	68.0597	1.14595	0.321105	3.56877	0.000358668	0.0503144	Rho GTPase-activating protein gacA;Rac GTPase activating protein 1;Rho-GAP domain-containing protein
BaRT2v18chr1HG017050	388.719	1.14274	0.267505	4.27183	1.93877e-05	0.00990918	CitMHS domain-containing protein;Putative transporter arsB;Citrate transporter family protein;Transmembrane protein, putative, expressed;Divalent ion symporter
BaRT2v18chr5HG235800	127.15	1.1423	0.311144	3.6713	0.000241317	0.0386883	Dihydrolipoamide acetyltransferase component of pyruvate dehydrogenase complex
BaRT2v18chr3HG122780	246.889	1.13941	0.279052	4.08316	4.44278e-05	0.0155862	0
BaRT2v18chr6HG317730	524.996	1.12569	0.295243	3.81276	0.000137423	0.0271162	0
BaRT2v18chr1HG037770	88.7712	1.11488	0.274005	4.06881	4.72529e-05	0.0157125	Phenylcoumaran benzylic ether reductase Pyrc5;Isoflavone reductase;NmrA domain-containing protein;Hopanoid-associated sugar epimerase
BaRT2v18chr6HG322310	117.915	1.08756	0.266467	4.08141	4.47631e-05	0.0155862	AUGMIN subunit 8;Flocculation protein FLO11-like
BaRT2v18chr3HG135280	246.441	1.08737	0.247087	4.40077	1.07867e-05	0.00878836	0
BaRT2v18chr5HG249000	349.644	1.06396	0.286635	3.7119	0.000205707	0.0345573	0
BaRT2v18chr1HG008880	667.197	1.05587	0.25457	4.14768	3.35868e-05	0.0137065	0
BaRT2v18chr7HG350250	231.359	1.04964	0.285741	3.67341	0.000239331	0.0386883	0
BaRT2v18chr3HG174080	291.79	0.998989	0.252629	3.95437	7.67363e-05	0.019684	0
BaRT2v18chr3HG116710	241.93	-1.02969	0.270048	-3.81299	0.000137293	0.0271162	Glycosyltransferase, HGA-like, expressed;Glycosyltransferase, HGA-like, putative,expressed;protein O-linked-mannose beta-1,4-N-acetylglucosaminyltransferase 2-like isoform X3;Putative glycosyltransferase AGO61;Putative glycosyltransferase AER61;Protein O-linked-mannose beta-1,4-N-acetylglucosaminyltransferase 2-like;Glycosyltransferase
BaRT2v18chr7HG356510	138.873	-1.0485	0.28249	-3.71163	0.000205928	0.0345573	0
BaRT2v18chr7HG369820	59.2406	-1.06503	0.296347	-3.59385	0.000325832	0.0468051	Tetratricopeptide repeat-containing domain;translation initiation factor IF-2-like;Tetratricopeptide-like helical
BaRT2v18chr7HG349100	523.696	-1.12631	0.202297	-5.56761	2.58258e-08	0.000115932	0
BaRT2v18chr7HG343130	575.2	-1.16401	0.287625	-4.04696	5.18863e-05	0.0160633	EamA domain-containing protein
BaRT2v18chr7HG378740	295.37	-1.17298	0.319354	-3.67298	0.00023974	0.0386883	Cellular retinaldehyde binding/alpha-tocopherol transport;Putative CRAL-TRIO lipid binding domain, GOLD domain, CRAL/TRIO domain-containing protein;CRAL-TRIO domain-containing protein;Patellin-4 like;Phosphatidylinositol transfer protein SEC14
BaRT2v18chr4HG220400	508.627	-1.25758	0.329558	-3.81595	0.000135659	0.0271162	Metacaspase-1;Putative transcription factor Znf-LSD family;Metacaspase 2
BaRT2v18chr2HG110170	360.825	-1.26931	0.305358	-4.15678	3.22758e-05	0.0134778	Flavonoid 3'-monooxygenase;trimethyltridecatetraene synthase-like
BaRT2v18chr2HG063730	47.089	-1.31953	0.343266	-3.84403	0.000121028	0.0258712	0
BaRT2v18chr6HG285660	225.06	-1.33113	0.338046	-3.93773	8.22552e-05	0.0202325	Protein kinase domain-containing protein
BaRT2v18chr6HG282150	69.2674	-1.3442	0.306385	-4.3873	1.14768e-05	0.00878836	0
BaRT2v18chr5HG251550	825.047	-1.42825	0.330415	-4.3226	1.54201e-05	0.0089317	Tuliposide A-converting enzyme 2, chloroplastic;2-hydroxyisoflavanone dehydratase;Gibberellin receptor GID1L2;Putative carboxylesterase 2
BaRT2v18chr5HG254230	37.83	-1.74421	0.361722	-4.82196	1.42153e-06	0.00196347	0
BaRT2v18chr3HG146800	75.9157	-1.85038	0.332259	-5.56908	2.56081e-08	0.000115932	Tryptophan aminotransferase-related protein 4;Alliin lyase;Putative pyridoxal phosphate-dependent transferase
BaRT2v18chr7HG379560	18.6888	-2.21432	0.37438	-5.91463	3.32621e-09	2.98627e-05	Putative LRR receptor-like serine/threonine-protein kinase
BaRT2v18chr6HG325470	2727.63	0.946661	0.236728	3.99894	6.3626e-05	0.0184269	0
BaRT2v18chr7HG350710	264.082	0.877945	0.233847	3.75436	0.000173788	0.0312054	0
BaRT2v18chr2HG097850	499.395	0.822913	0.22815	3.60689	0.000309886	0.0448735	0
BaRT2v18chr6HG307480	1344.28	0.815249	0.2	4.07624	4.57695e-05	0.0155862	0
BaRT2v18chr4HG177540	9945.89	-0.59953	0.160193	-3.74255	0.000182163	0.0322603	Antimicrobial21 domain-containing protein
BaRT2v18chr5HG258900	1120.24	-0.867514	0.219156	-3.95843	7.54435e-05	0.019684	0
BaRT2v18chr3HG121560	1711.75	-0.887614	0.237419	-3.73859	0.000185053	0.0322603	Premnaspirodiene oxygenase;Putative ferulate 5-hydroxylase
BaRT2v18chr4HG175910	278.66	-0.974723	0.263024	-3.70584	0.000210695	0.03503	0
BaRT2v18chrUnG391490	174.909	-0.982611	0.260622	-3.77026	0.000163079	0.0302793	0
BaRT2v18chr1HG001610	450.512	-0.985876	0.232375	-4.24261	2.2094e-05	0.0103213	Protein kinase domain-containing protein
BaRT2v18chr5HG275460	924.317	-0.832767	0.233713	-3.56321	0.000366354	0.0506019	DCD domain-containing protein
BaRT2v18chr3HG128850	154.444	1.03588	0.290929	3.5606	0.000370014	0.0507174	0
BaRT2v18chr3HG174030	107.553	1.00037	0.281189	3.55765	0.000374191	0.0509014	0
BaRT2v18chr1HG007090	402.406	-0.688123	0.193987	-3.54726	0.000389255	0.0521601	Zinc finger CCCH domain-containing protein 33;Transcription factor (Fragment)
BaRT2v18chr6HG312750	110.234	1.23575	0.348194	3.54903	0.000386649	0.0521601	Homing endonuclease, LAGLIDADG;Pentatricopeptide repeat-containing protein
BaRT2v18chr5HG258870	141.578	1.11432	0.314788	3.53989	0.000400288	0.0528498	0
BaRT2v18chr5HG277320	199.742	0.820946	0.231889	3.54026	0.000399734	0.0528498	0
BaRT2v18chr2HG090510	753.708	1.16536	0.329489	3.53688	0.000404883	0.0530662	Ribosomal protein L25;50S ribosomal protein L23, chloroplastic
BaRT2v18chr1HG027340	2113.75	-0.999007	0.282879	-3.53158	0.000413091	0.0533631	Lichenase-2;Putative O-Glycosyl hydrolase superfamily protein;Lichenase
BaRT2v18chr3HG167210	13.964	1.29963	0.367817	3.53337	0.000410303	0.0533631	Glycerol-3-phosphate dehydrogenase [NAD(+)];Probable glycerol-3-phosphate dehydrogenase [NAD(+)] 1, cytosolic
BaRT2v18chr2HG092310	57.1351	-1.24815	0.354323	-3.52264	0.00042727	0.0544117	Senescence regulator
BaRT2v18chr3HG156320	174.678	1.29658	0.368059	3.52275	0.000427097	0.0544117	0
BaRT2v18chr1HG001620	297.934	-0.955131	0.272585	-3.50397	0.000458378	0.0579623	0
BaRT2v18chr2HG107620	1467.62	1.10014	0.315375	3.48834	0.000486026	0.0606047	AAI domain-containing protein
BaRT2v18chr7HG363490	240.023	1.09251	0.313152	3.48875	0.000485293	0.0606047	VAMP protein SEC22;Late embryogenesis abundant protein, LEA-14
BaRT2v18chr2HG059130	159.064	1.28194	0.369126	3.47291	0.000514851	0.0608202	60S ribosomal protein L18-2
BaRT2v18chr2HG103800	77.5184	1.18827	0.342067	3.47379	0.000513165	0.0608202	0
BaRT2v18chr3HG115710	160.04	1.26579	0.364276	3.47481	0.000511219	0.0608202	60S ribosomal protein L9
BaRT2v18chr3HG150880	1226.82	-0.889801	0.256018	-3.47554	0.000509832	0.0608202	Diacylglycerol O-acyltransferase
BaRT2v18chr4HG203720	727.782	0.905799	0.26063	3.47543	0.000510037	0.0608202	Clp R domain-containing protein
BaRT2v18chr7HG336110	132.473	1.26754	0.364378	3.47865	0.000503944	0.0608202	Bisdemethoxycurcumin synthase-like;Curcuminoid synthase;Type III polyketide synthase B;Chalcone synthase
BaRT2v18chr7HG364780	108.219	1.26463	0.363934	3.47489	0.000511067	0.0608202	0
BaRT2v18chr7HG381210	298.315	0.966434	0.277389	3.48404	0.000493912	0.0608202	Homogentisate phytyltransferase;Digeranylgeranylglyceryl phosphate synthase (Fragment);Chlorophyll synthase
BaRT2v18chr1HG040410	241.851	1.24054	0.357743	3.4677	0.000524942	0.0612161	0
BaRT2v18chr2HG050030	117.235	1.09032	0.314513	3.4667	0.000526883	0.0612161	NB-ARC domain-containing protein;Disease resistance protein RGA2;AAA domain-containing protein
BaRT2v18chr7HG353030	183.917	1.25696	0.362663	3.46591	0.000528431	0.0612161	60S ribosomal protein L32-1
BaRT2v18chr1HG007760	73.6025	-1.18154	0.341192	-3.46299	0.000534215	0.061254	0
BaRT2v18chr2HG086420	635.03	-0.684373	0.197762	-3.46059	0.000538992	0.061254	PLAT domain-containing protein;Lipoxygenase y domain-containing protein 1 (Fragment);PLAT/LH2 domain
BaRT2v18chr6HG325390	60.6231	-1.08085	0.312327	-3.46065	0.000538869	0.061254	Nicotianamine synthase
BaRT2v18chr2HG084230	244.837	1.24193	0.359124	3.45823	0.000543731	0.061404	0
BaRT2v18chr2HG079640	94.5772	1.1008	0.319583	3.44449	0.000572148	0.0638105	0
BaRT2v18chr5HG243420	254.057	1.06413	0.308846	3.44551	0.000569977	0.0638105	0
BaRT2v18chr1HG021690	695.274	-0.79193	0.230063	-3.44222	0.000576954	0.0639493	Auxin-responsive protein SAUR32;auxin-responsive protein SAUR32-like;Auxin-induced protein 15A
BaRT2v18chr5HG268340	1412.17	1.11026	0.322739	3.4401	0.000581494	0.0640571	Elongation factor 1-alpha
BaRT2v18chr7HG382010	137.047	1.22962	0.358034	3.43438	0.000593908	0.0650257	0
BaRT2v18chr2HG114690	33.5432	-1.23238	0.359766	-3.42551	0.000613638	0.0667787	Protein kinase domain-containing protein
BaRT2v18chr7HG341770	104.557	1.27873	0.373535	3.42332	0.000618613	0.0669146	Ribosomal protein L35A
BaRT2v18chr7HG363740	47.7897	1.10468	0.323123	3.41876	0.000629072	0.0676384	Choline transporter-like protein 2
BaRT2v18chr4HG197350	32.3972	1.21825	0.356536	3.41689	0.000633407	0.0676991	0
BaRT2v18chr3HG158320	71.0436	1.13226	0.332037	3.41005	0.000649516	0.0685879	0
BaRT2v18chr5HG272780	16.3144	1.2686	0.372187	3.40851	0.000653182	0.0685879	Phytocyanin domain-containing protein;Mavicyanin;Cupredoxin superfamily protein;Putative Early nodulin 16;Uclacyanin 1
BaRT2v18chr5HG278580	70.7764	1.01495	0.297594	3.4105	0.000648434	0.0685879	Pentatricopeptide repeat-containing protein
BaRT2v18chr1HG045370	1978.2	1.05212	0.30926	3.40205	0.000668813	0.0690184	probable 3-hydroxyisobutyrate dehydrogenase-like 3, mitochondrial;Putative 3-hydroxyisobutyrate dehydrogenase-like 3;3-hydroxyisobutyrate dehydrogenase-like;6-phosphogluconate dehydrogenase, NADP-binding protein
BaRT2v18chr2HG072430	132.824	-0.835612	0.245472	-3.4041	0.00066383	0.0690184	0
BaRT2v18chr3HG171100	82.6243	1.24723	0.366557	3.40256	0.000667573	0.0690184	0
BaRT2v18chr5HG234570	22.1174	1.26909	0.374143	3.39201	0.000693828	0.0696366	Pentatricopeptide repeat-containing protein
BaRT2v18chr5HG243300	16220.9	-0.689912	0.203274	-3.394	0.000688794	0.0696366	Aspartokinase;Bifunctional aspartokinase/homoserine dehydrogenase 1, chloroplastic
BaRT2v18chr5HG272230	455.032	1.20754	0.355675	3.39505	0.000686159	0.0696366	60S ribosomal protein L7-2
BaRT2v18chr6HG301290	137.913	1.25279	0.369486	3.39064	0.000697305	0.0696366	0
BaRT2v18chr7HG382820	35.1474	1.19456	0.351952	3.39411	0.00068852	0.0696366	Aldehyde oxidase/xanthine dehydrogenase molybdopterin binding protein;FAD-binding PCMH-type domain-containing protein
BaRT2v18chrUnG389950	11.6101	1.24088	0.366005	3.39034	0.000698073	0.0696366	0
BaRT2v18chr7HG341910	22.5393	1.25462	0.370265	3.38844	0.000702907	0.0697315	Pectinesterase
BaRT2v18chr1HG013860	211.908	1.23011	0.363302	3.38592	0.000709408	0.0699897	60S ribosomal protein L11;Ribosomal protein large subunit 16A;Ribosomal protein L5
BaRT2v18chr7HG378060	433.249	-0.931178	0.275223	-3.38336	0.000716039	0.0702579	0
BaRT2v18chr6HG293050	136.791	1.20774	0.358056	3.37306	0.00074339	0.0725452	0
BaRT2v18chr1HG020690	32.8981	-1.24148	0.368911	-3.36526	0.000764713	0.0738961	0
BaRT2v18chr5HG272420-BaRT2v18chr5HG272430-BaRT2v18chr5HG272440	6366.16	0.985317	0.292814	3.36499	0.000765465	0.0738961	Chlorophyll a-b binding protein, chloroplastic
BaRT2v18chr2HG108240	819.567	1.13177	0.336931	3.35904	0.000782125	0.0747013	beta-xylosidase/alpha-L-arabinofuranosidase 2-like;Beta-xylosidase/alpha-L-arabinofuranosidase 2;Beta-D-xylosidase 4
BaRT2v18chr5HG235520	335.491	1.19118	0.354617	3.35906	0.000782092	0.0747013	0
BaRT2v18chr1HG001810	46.9097	1.03691	0.308936	3.3564	0.000789639	0.0750199	0
BaRT2v18chr7HG336960	15.5223	1.19487	0.356198	3.35452	0.000795034	0.0751349	hydroxycinnamoyltransferase 1;Anthranilate N-benzoyltransferase protein 1;putrescine hydroxycinnamoyltransferase-like;Shikimate O-hydroxycinnamoyltransferase-like;Omega-hydroxypalmitate O-feruloyl transferase;HXXXD-type acyl-transferase family protein
BaRT2v18chr1HG019290	163.888	0.873403	0.260689	3.35037	0.000807045	0.0755191	0
BaRT2v18chr3HG153830	487.741	1.13126	0.337965	3.34728	0.000816093	0.0755191	60S ribosomal protein L24-1;TRASH domain-containing protein
BaRT2v18chr4HG185770	737.667	1.16761	0.34893	3.34627	0.000819072	0.0755191	60S ribosomal protein L3;Ribosomal protein L3B
BaRT2v18chr4HG213820	341.448	-1.09753	0.328102	-3.34508	0.000822596	0.0755191	0
BaRT2v18chr5HG247790	1000.35	1.03741	0.310183	3.34449	0.000824334	0.0755191	20 kDa chaperonin, chloroplastic;Chaperonin, chloroplastic;Chaperonin
BaRT2v18chr6HG311920	23.1739	-1.25115	0.373863	-3.34656	0.000818212	0.0755191	Nitrate transporter 1.5;Peptide transporter PTR1;Solute carrier family 15 (Peptide/histidine transporter), member 3/4
BaRT2v18chr4HG188050	1042.86	-0.922762	0.276027	-3.34302	0.000828725	0.0755359	Clp R domain-containing protein
BaRT2v18chr2HG100890	113.54	1.24218	0.371775	3.34121	0.000834154	0.0756468	60S ribosomal protein L12
BaRT2v18chr2HG054770	255.961	1.18395	0.354764	3.33729	0.000845988	0.0759528	40S ribosomal protein S6;Ribosomal proteinS6
BaRT2v18chr5HG264740	20.8459	1.19852	0.359118	3.33739	0.000845706	0.0759528	Premnaspirodiene oxygenase;Putative ferulate 5-hydroxylase
BaRT2v18chr2HG097880	441.659	1.18476	0.355334	3.33422	0.000855395	0.076037	40S ribosomal protein S11;Small subunit ribosomal protein S11e;Ribosomal protein S11-beta isoform 1
BaRT2v18chr5HG271420	196.409	1.00863	0.302393	3.3355	0.000851458	0.076037	probable GTP-binding protein OBGC2;GTP-dependent nucleic acid-binding protein engD, putative
BaRT2v18chr2HG083380	320.578	1.10748	0.332809	3.32768	0.000875724	0.0774606	40S ribosomal protein S14
BaRT2v18chr4HG193590	1810.58	0.681892	0.205214	3.32284	0.000891066	0.0780487	0
BaRT2v18chr7HG377430	289.39	1.1302	0.340089	3.32326	0.000889732	0.0780487	40S ribosomal protein S14
BaRT2v18chr3HG148830	124.417	0.896237	0.269938	3.32016	0.000899665	0.0784193	Dihydroorotase;Dihydroorotase, mitochondrial
BaRT2v18chr4HG201960	31.6493	-1.23671	0.373163	-3.31414	0.000919251	0.0797395	0
BaRT2v18chr5HG256090	282.312	1.19422	0.360489	3.31277	0.00092377	0.0797462	0
BaRT2v18chr2HG091850	234.613	1.17872	0.356321	3.30803	0.000939557	0.080721	0
BaRT2v18chr1HG030510	72.0125	1.23426	0.373629	3.30345	0.000955032	0.0814115	0
BaRT2v18chr3HG168850	14.1561	1.22438	0.370988	3.30032	0.00096573	0.0814115	0
BaRT2v18chr5HG249750	249.133	1.16092	0.351549	3.30232	0.000958902	0.0814115	0
BaRT2v18chr7HG334240	242.105	1.16694	0.35351	3.30101	0.000963389	0.0814115	40S ribosomal protein S20;Ribosomal protein S10, eukaryotic and archaeal form;Ribosomal protein S10
BaRT2v18chr3HG145890	138.972	-0.950096	0.288628	-3.29176	0.000995626	0.0833128	0
BaRT2v18chr5HG253780	102.598	0.938849	0.285259	3.29121	0.000997563	0.0833128	OTU domain-containing protein;Ovarian tumor
BaRT2v18chr3HG144080	184.616	1.20702	0.36757	3.28378	0.00102424	0.0851449	0
BaRT2v18chr1HG028370	261.054	1.13172	0.345068	3.27971	0.00103913	0.0859847	0
BaRT2v18chr2HG094170	28.1764	-1.20728	0.368777	-3.27374	0.00106134	0.0874193	0
BaRT2v18chr6HG282880	16.4514	1.13002	0.34542	3.27145	0.00106997	0.0877276	0
BaRT2v18chr6HG323900	116.056	1.09958	0.337255	3.26038	0.00111261	0.0903985	0
BaRT2v18chr7HG351850	266.841	0.723561	0.22192	3.26045	0.00111234	0.0903985	Plant intracellular Ras-group-related LRR protein 4;Leucine-rich repeat-containing protein 40
BaRT2v18chr1HG017770	230.727	1.1662	0.358407	3.25383	0.00113859	0.091766	60S ribosomal protein L21-1
BaRT2v18chr5HG236080	45.7136	1.13911	0.350112	3.25357	0.00113966	0.091766	0
BaRT2v18chr3HG154370	116.839	1.01513	0.312648	3.24689	0.00116674	0.0935192	Protein FATTY ACID EXPORT 3 chloroplastic;Non-green plastid inner envelope membrane protein
BaRT2v18chr6HG284160	193.642	1.05881	0.326224	3.24564	0.00117185	0.0935192	Secologanin synthase;Eceriferum-u
BaRT2v18chr3HG173320	523.608	0.972712	0.300204	3.24017	0.00119459	0.0940793	0
BaRT2v18chr5HG267890	40.0943	1.0286	0.317414	3.24056	0.00119295	0.0940793	VARLMGL domain-containing protein
BaRT2v18chr7HG385510	430.374	-0.776737	0.239649	-3.24114	0.00119053	0.0940793	DNL-type domain-containing protein;Mitochondrial protein import protein ZIM17;Putative hop-interacting protein-like
BaRT2v18chr3HG135230	91.6054	1.01842	0.3152	3.23103	0.00123345	0.0967151	0
BaRT2v18chr7HG328780	112.786	1.19771	0.371095	3.2275	0.00124875	0.0974896	0
BaRT2v18chr2HG054600	12.8554	1.15823	0.359268	3.22387	0.00126472	0.0983087	0
BaRT2v18chr1HG019760	10.5718	-1.19732	0.371687	-3.22131	0.00127607	0.0987631	MATH domain-containing protein
BaRT2v18chr3HG119540	803.246	1.00359	0.312005	3.21657	0.00129731	0.0991258	Non-specific lipid-transfer protein;Non-specific lipid-transfer protein Cw18;Non-specific lipid-transfer protein 3
BaRT2v18chr3HG157580	8.53965	1.15273	0.358249	3.21767	0.00129236	0.0991258	Laccase
BaRT2v18chr6HG300630	34.1871	1.1625	0.361351	3.21708	0.00129502	0.0991258	Putative GATA transcription factor 22;GATA-type domain-containing protein
BaRT2v18chr2HG086520	638.536	-0.711289	0.221296	-3.2142	0.00130806	0.0995238	Putative WRKY transcription factor 19
BaRT2v18chr5HG272650	30.7454	1.16941	0.365383	3.2005	0.00137191	0.103941	0
BaRT2v18chr5HG238700	138.06	1.09012	0.341157	3.19537	0.0013965	0.10536	Cysteine protease XCP1;Xylem cysteine proteinase 1;Cysteine proteinase CP1
BaRT2v18chr5HG255270	100.874	1.13359	0.354901	3.19411	0.00140265	0.105381	0
BaRT2v18chr3HG129980	50.3108	-1.01107	0.316732	-3.19221	0.00141189	0.105633	0
BaRT2v18chr2HG108640	85.8236	1.13618	0.35629	3.18892	0.00142805	0.106042	0
BaRT2v18chr3HG173340	108.694	1.01873	0.319549	3.18801	0.00143253	0.106042	Pectin acetylesterase
BaRT2v18chr6HG304520	413.687	1.12674	0.353486	3.1875	0.00143508	0.106042	60S ribosomal protein L6
BaRT2v18chr6HG314240	185.233	1.12533	0.35361	3.1824	0.0014606	0.107486	60S ribosomal protein L31;Large subunit ribosomal protein L31e;PfkB-like carbohydrate kinase family protein
BaRT2v18chr1HG045990	16.6519	1.18507	0.373031	3.17686	0.00148877	0.107792	0
BaRT2v18chr3HG130350	15.7886	-1.18794	0.373817	-3.17787	0.0014836	0.107792	Mitochondrial arginine transporter BAC2;Mitochondrial carnitine/acylcarnitine carrier protein CACL;Endoplasmic reticulum-adenine nucleotide transporter
BaRT2v18chr5HG229830	102.635	1.1807	0.371525	3.17797	0.0014831	0.107792	Protein rough sheath 2/ASYMMETRIC LEAVES;Asymmetric leaves 1;Transcription factor AS1;Phantastica;Myb transcription factor
BaRT2v18chr5HG264940	992.024	-0.655266	0.206248	-3.17708	0.00148765	0.107792	Auxin-responsive protein IAA13;Auxin-responsive protein;Auxin-responsive protein IAA16
BaRT2v18chr7HG380930	93.7012	1.16473	0.367106	3.17274	0.00151006	0.108894	60S ribosomal protein L30;Large subunit ribosomal protein L30e
BaRT2v18chr4HG180160	306.217	0.958039	0.302272	3.16946	0.00152722	0.109691	0
BaRT2v18chr3HG122230	197.127	-0.945562	0.298739	-3.16517	0.00154991	0.110877	0
BaRT2v18chr1HG010050	417.922	0.720671	0.228461	3.15446	0.00160795	0.113465	0
BaRT2v18chr1HG037540	117.345	1.10091	0.349322	3.15156	0.001624	0.113465	Subtilisin-like protease;Peptidase S8/S53 domain
BaRT2v18chr2HG105060	15.9088	1.15531	0.36651	3.15219	0.00162051	0.113465	0
BaRT2v18chr2HG106570	37.7422	-1.11974	0.355149	-3.15286	0.00161677	0.113465	Aspergillus nuclease S(1)
BaRT2v18chr7HG345620	230.128	0.749693	0.237631	3.15487	0.0016057	0.113465	Ankyrin repeat domain-containing protein EMB506, chloroplastic
BaRT2v18chr7HG361340	86.5047	1.14837	0.36419	3.15321	0.00161484	0.113465	0
BaRT2v18chr5HG246800	54.546	-1.0242	0.325159	-3.14985	0.00163353	0.113689	Putative inactive receptor kinase;Protein kinase domain-containing protein
BaRT2v18chr2HG049850	32.6328	-1.16418	0.369926	-3.14707	0.00164915	0.113905	10-deacetylbaccatin III 10-O-acetyltransferase;3'-N-debenzoyl-2'-deoxytaxol N-benzoyltransferase;Benzyl alcohol O-benzoyltransferase-like;HXXXD-type acyl-transferase family protein
BaRT2v18chr2HG089510	501.861	0.651996	0.207178	3.14704	0.00164933	0.113905	Glycine-rich protein
BaRT2v18chr1HG033020	205.728	0.667671	0.212455	3.14264	0.00167429	0.115186	0
BaRT2v18chr2HG095150	356.464	-0.916684	0.291859	-3.14084	0.00168462	0.115454	H15 domain-containing protein
BaRT2v18chr3HG172950	158.128	1.14963	0.366381	3.13781	0.00170215	0.115901	0
BaRT2v18chr7HG345850	225.205	-0.872836	0.278196	-3.13748	0.00170404	0.115901	Microtubule binding protein YTM1 (Contains WD40 repeats);Transducin family protein-like;Ribosome assembly protein 4;Vegetative incompatibility protein HET-E-1
BaRT2v18chr6HG327850	68.9435	-0.972007	0.309915	-3.13637	0.00171053	0.115903	3-ketoacyl-CoA synthase
BaRT2v18chr1HG033960	71.1504	1.11888	0.356984	3.13425	0.00172294	0.116305	0
BaRT2v18chr7HG386390	51.5744	0.934706	0.298543	3.13089	0.00174275	0.117202	tRNA dimethylallyltransferase 9;tRNA isopentenyltransferase;Isopentenyl transferase
BaRT2v18chr4HG179150	145.61	-0.786678	0.25156	-3.1272	0.00176478	0.118129	caffeoylshikimate esterase-like;Monoglyceride lipase;Alpha/beta hydrolase-1;Acylglycerol lipase
BaRT2v18chr7HG344000	24.8387	1.17151	0.374716	3.12639	0.00176969	0.118129	SHSP domain-containing protein;26.2 kDa heat shock protein, mitochondrial
BaRT2v18chr1HG045140	86.3604	1.09095	0.349242	3.12378	0.00178544	0.118739	Ubiquitin;Ubiquitin-40S ribosomal protein S27a-2;Ubiquitin-40S ribosomal protein S27a
BaRT2v18chr1HG015670	349.931	0.64844	0.207871	3.11943	0.00181201	0.118793	30S ribosomal protein S3, chloroplastic;Ribosomal protein S3
BaRT2v18chr1HG042620	7.13383	-1.10486	0.354201	-3.11932	0.00181272	0.118793	Homeobox-leucine zipper protein HOX7;Homeobox, conserved site-containing protein;Homeobox domain-containing protein
BaRT2v18chr2HG058690	38.1027	-1.07947	0.345915	-3.12063	0.00180467	0.118793	Protein kinase domain-containing protein;Rust resistance kinase Lr10
BaRT2v18chr4HG183350	7548.57	-0.624058	0.199886	-3.12207	0.00179586	0.118793	UDP-glucose-fructose-phosphate glucosyltransferase;Sucrose-phosphate synthase
BaRT2v18chr3HG155390	197.925	0.886336	0.284532	3.11506	0.00183905	0.1199	Embryogenesis-associated protein;Embryogenesis-associated protein EMB8;AB hydrolase-1 domain-containing protein
BaRT2v18chr7HG334770	646.734	0.987149	0.316959	3.11444	0.00184297	0.1199	ATP-dependent Clp protease proteolytic subunit
BaRT2v18chr5HG272440	15888.2	0.994789	0.319542	3.11317	0.00185091	0.119982	Chlorophyll a-b binding protein, chloroplastic
BaRT2v18chr4HG210430	91.2714	1.15754	0.372081	3.11099	0.00186461	0.120435	0
BaRT2v18chr6HG291870	146.452	0.851574	0.273864	3.10948	0.00187416	0.120618	Auxin response factor
BaRT2v18chr5HG281490	262.136	0.884216	0.28472	3.10557	0.00189914	0.121678	NB-ARC domain-containing protein;NBS-LRR disease resistance protein homologue (Fragment)
BaRT2v18chr6HG283350	361.345	-0.860022	0.276999	-3.10478	0.00190418	0.121678	probable serine/threonine-protein kinase PBL15;serine/threonine-protein kinase At5g01020;Protein kinase domain-containing protein
BaRT2v18chr2HG100330	1194.91	-0.677591	0.218336	-3.10343	0.00191289	0.121801	0
BaRT2v18chr7HG378250	742.104	0.923859	0.297938	3.10085	0.00192968	0.122436	Tr-type G domain-containing protein
BaRT2v18chr2HG083260	125.237	-0.805324	0.259921	-3.09834	0.0019461	0.123043	0
BaRT2v18chr5HG239190	85.2479	1.09	0.35229	3.09404	0.0019745	0.124401	0
BaRT2v18chr1HG003950	136.463	1.10703	0.359004	3.08361	0.00204507	0.126292	4-hydroxyphenylacetaldehyde oxime monooxygenase
BaRT2v18chr1HG040790	147.715	-1.05351	0.341816	-3.08209	0.00205554	0.126292	Sulfotransferase
BaRT2v18chr2HG098830	66.1242	0.936288	0.30362	3.08375	0.0020441	0.126292	0
BaRT2v18chr4HG179720	36.3574	0.990975	0.321237	3.08488	0.00203637	0.126292	DBR1 domain-containing protein;Lariat debranching enzyme
BaRT2v18chr5HG253190	40.82	1.15309	0.374217	3.08133	0.00206078	0.126292	Small heat shock protein, chloroplastic;SHSP domain-containing protein
BaRT2v18chr5HG268330	1062.71	0.998558	0.324041	3.08158	0.00205906	0.126292	Elongation factor 1-alpha
BaRT2v18chr6HG314960	1079.04	-0.690531	0.223745	-3.08624	0.00202705	0.126292	Dof zinc finger protein DOF5.4;Dof-type domain-containing protein;C2C2-DOF transcription factor
BaRT2v18chr7HG358490	1029.37	0.962701	0.3123	3.08261	0.00205192	0.126292	KH type-2 domain-containing protein;40S ribosomal protein S3-3
BaRT2v18chr2HG106080	177.202	-0.705052	0.229103	-3.07745	0.00208782	0.127513	0
BaRT2v18chr7HG385030	93.5703	1.1354	0.369334	3.0742	0.0021107	0.128473	O-methyltransferase family protein, expressed;Putative O-methyltransferase 2;O-methyltransferase ZRP4
BaRT2v18chr1HG003390	226.093	0.79845	0.25986	3.07261	0.00212193	0.128721	Inorganic diphosphatase
BaRT2v18chr3HG115740	160.551	1.12244	0.365594	3.07019	0.00213925	0.128901	60S ribosomal protein L9
BaRT2v18chr5HG221380	141.751	0.960952	0.312984	3.07029	0.00213848	0.128901	FAD/NAD(P)-binding oxidoreductase family protein
BaRT2v18chr1HG013760	85.3325	0.845045	0.275524	3.06704	0.0021619	0.129305	0
BaRT2v18chr1HG021070	305.137	0.730235	0.238469	3.06218	0.00219731	0.129305	0
BaRT2v18chr3HG115310	17.6328	1.12966	0.368691	3.06398	0.00218416	0.129305	0
BaRT2v18chr3HG165110	80.4007	1.06346	0.346989	3.06482	0.00217801	0.129305	0
BaRT2v18chr4HG196740	2210.65	0.614939	0.200534	3.0665	0.00216578	0.129305	Pheophorbide a oxygenase family protein;Magnesium-protoporphyrin IX monomethyl ester (Oxidative) cyclase
BaRT2v18chr4HG215570	592.6	-0.802083	0.261586	-3.06624	0.00216771	0.129305	E3 ubiquitin-protein ligase XBOS31;Putative acetyl-ornithine/Acetyl-lysine deacetylase;Alcohol dehydrogenase class-3
BaRT2v18chr6HG316220	554.271	0.703681	0.229735	3.06302	0.00219116	0.129305	NAD-dependent dihydropyrimidine dehydrogenase subunit PreA;Pyrimidine 1 isoform 1;Putative dihydropyrimidinase
BaRT2v18chr7HG381190	3480.93	0.752258	0.245729	3.06133	0.00220357	0.129305	Protein PYRICULARIA ORYZAE RESISTANCE 21
BaRT2v18chr2HG076070	209.937	1.06724	0.349043	3.05761	0.00223109	0.130494	0
BaRT2v18chr1HG044950	256.034	-0.932551	0.305593	-3.05161	0.00227619	0.131843	Cytochrome P450 family 87 subfamily A polypeptide 6;Transposon protein, putative, unclassified
BaRT2v18chr4HG180330	833.048	-0.683227	0.223851	-3.05216	0.00227202	0.131843	0
BaRT2v18chr7HG348380	108.889	-1.06785	0.34971	-3.05352	0.00226171	0.131843	Zinc finger protein CONSTANS-LIKE 9;C2C2-CO-like transcription factor
BaRT2v18chr6HG312950	4396.44	-0.735881	0.241252	-3.05025	0.00228647	0.132013	Carotenoid cleavage dioxygenase 4;zeaxanthin 7,8(7',8')-cleavage dioxygenase, chromoplastic;Nine-cis-epoxycarotenoid dioxygenase 4
BaRT2v18chr2HG092150	1929.69	-1.04778	0.343777	-3.04785	0.00230489	0.132649	0
BaRT2v18chr4HG195760	807.538	0.855032	0.280811	3.04487	0.00232782	0.133116	Calcium-dependent lipid-binding family protein;31 kDa ribonucleoprotein, chloroplastic
BaRT2v18chr5HG245140	32.0681	1.13115	0.371404	3.04561	0.00232212	0.133116	0
BaRT2v18chr4HG199990	975.928	0.942405	0.310312	3.03696	0.0023898	0.136226	Elongation factor 1-alpha
BaRT2v18chr6HG314080	62.9851	-1.13049	0.372975	-3.03101	0.00243739	0.1385	0
BaRT2v18chr2HG052290	1000.21	0.823371	0.271998	3.02712	0.00246893	0.139502	NAD(P)-binding Rossmann-fold superfamily protein
BaRT2v18chr3HG169400	690.017	-0.627999	0.207471	-3.02692	0.00247057	0.139502	CRT-like domain-containing protein;CRT (Chloroquine-resistance transporter)-like transporter, putative;Chloroquine-resistance transporter-like;Putative chloroquine-resistance transporter
BaRT2v18chr1HG048480	34.7818	1.13177	0.374659	3.0208	0.00252111	0.140993	0
BaRT2v18chr1HG048890	932.739	0.835456	0.276557	3.02092	0.00252012	0.140993	0
BaRT2v18chr3HG137990	3248.73	-0.791313	0.261879	-3.02167	0.00251385	0.140993	Vacuolar-processing enzyme;Senescence enhanced2b;Legumain
BaRT2v18chr4HG187460	153.948	1.0704	0.354466	3.01976	0.00252975	0.140993	40S ribosomal protein S16;Putative ribosomal protein S9;Small subunit ribosomal protein S16e
BaRT2v18chr5HG279150	727.622	0.952692	0.315567	3.01898	0.00253625	0.140993	0
BaRT2v18chr4HG197050	172.763	-0.793493	0.263178	-3.01504	0.00256943	0.142397	RING-type E3 ubiquitin transferase
BaRT2v18chr6HG281990	8422.31	-0.954427	0.316742	-3.01326	0.00258456	0.142795	0
BaRT2v18chr5HG240610	245.19	1.05299	0.349855	3.0098	0.0026142	0.143989	Ribosomal protein L15
BaRT2v18chr4HG174890	164.383	1.06846	0.355175	3.00826	0.00262752	0.14428	0
BaRT2v18chr2HG103120	6621.69	0.82977	0.275951	3.00694	0.0026389	0.144464	0
BaRT2v18chr5HG279200	350.625	-0.585424	0.194906	-3.00362	0.00266789	0.145607	0
BaRT2v18chr2HG059260	197.997	1.09828	0.366037	3.00045	0.00269584	0.145803	60S ribosomal protein L22-2
BaRT2v18chr4HG184260	42.2966	-1.11785	0.372381	-3.0019	0.00268302	0.145803	Monogalactosyldiacylglycerol synthase
BaRT2v18chr5HG268590	41.2822	1.11273	0.370747	3.0013	0.00268826	0.145803	0
BaRT2v18chr7HG339690	173.97	1.09841	0.366285	2.99879	0.00271052	0.146157	0
BaRT2v18chr5HG254170	545.926	0.717669	0.239573	2.99562	0.00273891	0.146806	Heat shock 70 kDa protein, mitochondrial;Mitochondrial HSO70 2
BaRT2v18chr7HG346860	20.1644	1.12272	0.374719	2.99616	0.00273401	0.146806	0
BaRT2v18chr4HG203210	603.582	0.707485	0.236329	2.99364	0.00275673	0.146884	protein CHAPERONE-LIKE PROTEIN OF POR1, chloroplastic-like
BaRT2v18chr7HG330740	46.7308	1.01157	0.337852	2.99411	0.00275248	0.146884	0
BaRT2v18chr2HG059050	524.631	1.02199	0.341932	2.98887	0.00280016	0.148756	Ribosomal protein L19;60S ribosomal protein L19-2
BaRT2v18chr6HG285300	140.392	0.955904	0.320662	2.98103	0.00287277	0.152164	0
BaRT2v18chr2HG057130	196.98	-0.811494	0.27233	-2.97981	0.00288425	0.152322	Hexosyltransferase
BaRT2v18chr5HG265140	134.068	-0.789161	0.264923	-2.97883	0.00289352	0.152364	Serine/threonine-protein kinase STY13 isoform A;Protein kinase domain-containing protein
BaRT2v18chr2HG102780	26.7379	-1.09593	0.368068	-2.9775	0.00290606	0.152577	0
BaRT2v18chr2HG083600	13.0146	1.10184	0.370574	2.97333	0.00294592	0.154219	AAI domain-containing protein
BaRT2v18chr1HG038220	24.2463	1.10146	0.370774	2.97069	0.00297132	0.155096	0
BaRT2v18chr3HG117240	346.13	0.882748	0.297584	2.96639	0.00301321	0.156033	Mannose-6-phosphate isomerase
BaRT2v18chr3HG159770	329.251	0.814029	0.274355	2.96706	0.00300658	0.156033	Formin-like protein 1
BaRT2v18chr4HG200030	105.253	0.943371	0.318138	2.96529	0.00302402	0.156033	Glycosyltransferases
BaRT2v18chr7HG357650	43.8934	0.898912	0.303072	2.96601	0.00301695	0.156033	0
BaRT2v18chr3HG156580	333.278	0.614934	0.207598	2.96214	0.00305512	0.157185	Protein-serine/threonine phosphatase
BaRT2v18chr7HG340430	200.318	1.02443	0.34611	2.95984	0.00307799	0.15791	Heparanase-like protein 3;Heparanase-like protein 3-like;Heparanase
BaRT2v18chr6HG323990	90.0788	1.07822	0.365193	2.95248	0.00315232	0.160804	0
BaRT2v18chr6HG327610	42.3661	1.05373	0.356843	2.95292	0.00314784	0.160804	0
BaRT2v18chr3HG157750	60.3432	1.03406	0.350838	2.94741	0.00320448	0.162541	0
BaRT2v18chr7HG368800	145.385	0.863168	0.292819	2.94779	0.00320058	0.162541	Dentin sialophosphoprotein-like
BaRT2v18chr2HG079010	125.177	-0.814629	0.27678	-2.94324	0.00324797	0.164283	Alanine amino transferase8;Pentatricopeptide repeat-containing protein ELI1 chloroplastic;C2 domain-containing protein;GTPase activating protein 1;Putative ADP-ribosylation factor GTPase-activating protein AGD13
BaRT2v18chr1HG027580	23.6841	1.09171	0.371636	2.93758	0.00330789	0.165074	0
BaRT2v18chr2HG081020	111.694	-0.850387	0.289417	-2.93827	0.00330046	0.165074	0
BaRT2v18chr4HG204170	241.707	0.746266	0.253935	2.93881	0.00329475	0.165074	0
BaRT2v18chr5HG259860	322.592	0.830198	0.282378	2.94003	0.00328184	0.165074	0
BaRT2v18chr7HG369270	850.3	-1.00358	0.341653	-2.93742	0.00330956	0.165074	Peroxidase
BaRT2v18chr7HG332280	32.2447	0.982522	0.334608	2.93634	0.0033211	0.16519	0
BaRT2v18chr2HG082310	32.4574	1.08879	0.371083	2.93409	0.00334522	0.165717	E3 ubiquitin protein ligase DRIP2;RING finger protein
BaRT2v18chr3HG117980	57.358	-0.936429	0.319204	-2.93364	0.00335015	0.165717	0
BaRT2v18chr2HG081910	959.467	0.536863	0.183368	2.92779	0.00341376	0.1684	Transposon protein, putative, CACTA, En/Spm sub-class
BaRT2v18chr1HG016500	30.0432	-1.06134	0.362856	-2.92496	0.00344501	0.169476	E3 ubiquitin ligase complex SCF subunit
BaRT2v18chr6HG314710	16.1465	-1.07309	0.36708	-2.92331	0.00346335	0.169912	0
BaRT2v18chr2HG091610	23.2517	1.08866	0.372911	2.91934	0.00350769	0.171619	0
BaRT2v18chr7HG366010	49.0379	0.949882	0.325866	2.91495	0.00355743	0.173579	0
BaRT2v18chr5HG263770	1073.89	1.09071	0.374465	2.91271	0.00358309	0.174358	0
BaRT2v18chr7HG341200	80.2639	0.838698	0.288352	2.90859	0.00363062	0.176193	0
BaRT2v18chr5HG273150	23.8426	-1.06746	0.367132	-2.90757	0.00364244	0.17629	Glycosyltransferase
BaRT2v18chr2HG090980	11.7388	1.00835	0.346983	2.90606	0.00366012	0.176395	Leucine-rich repeat, plant specific;Leucine-rich repeat (LRR) family protein;LRR domain containing protein
BaRT2v18chr3HG117360	52.2739	0.870366	0.299537	2.90571	0.00366425	0.176395	Bowman-Birk type trypsin inhibitor
BaRT2v18chr1HG014090	359.708	0.947748	0.326432	2.90336	0.00369185	0.177147	GDSL esterase/lipase
BaRT2v18chr4HG202170	19.6141	1.08274	0.373118	2.90187	0.00370948	0.177147	0
BaRT2v18chr7HG351820	39.2844	1.05137	0.362226	2.90253	0.00370159	0.177147	0
BaRT2v18chr7HG342050	447.751	-0.623899	0.215207	-2.89906	0.00374285	0.178267	0
BaRT2v18chr1HG031250	197.188	0.863452	0.298081	2.89671	0.00377103	0.1791	Tubulin beta chain
BaRT2v18chr2HG081350	130.247	0.862994	0.298002	2.89594	0.00378029	0.1791	ATP-dependent DNA helicase Q4 (Fragment)
BaRT2v18chr1HG001360	210.27	0.892906	0.309791	2.88229	0.003948	0.179936	Arginine decarboxylase
BaRT2v18chr1HG009220	676.285	-0.715962	0.248194	-2.88469	0.00391796	0.179936	Carboxypeptidase
BaRT2v18chr2HG057570	1290.09	-0.769947	0.266465	-2.88948	0.00385876	0.179936	Hexosyltransferase
BaRT2v18chr2HG061200	9.70395	-1.06731	0.370404	-2.88147	0.00395826	0.179936	0
BaRT2v18chr2HG080830	115.721	1.05608	0.365983	2.8856	0.00390674	0.179936	Peptidylprolyl isomerase
BaRT2v18chr2HG082500	101.382	0.861124	0.298824	2.8817	0.0039553	0.179936	0
BaRT2v18chr2HG084080	4284.58	-0.806589	0.279422	-2.88664	0.00389381	0.179936	Abscisic stress-ripening protein 2;glycine-rich cell wall structural protein 2-like isoform X3;ABA/WDS induced protein;keratin, type I cytoskeletal 10;TATA-binding protein-associated factor 2N-like;glycine-rich protein 2-like
BaRT2v18chr2HG103440	15.8606	1.07902	0.374065	2.88458	0.00391941	0.179936	CRIB domain-containing protein
BaRT2v18chr3HG116300	51.6387	1.04027	0.360336	2.88696	0.00388985	0.179936	Fatty acyl-CoA reductase
BaRT2v18chr3HG127950	83.0088	1.02268	0.353617	2.89206	0.00382729	0.179936	0
BaRT2v18chr3HG155090	69.9446	0.912758	0.316439	2.88447	0.00392078	0.179936	0
BaRT2v18chr4HG216610-BaRT2v18chr4HG216620	31.5663	-1.02799	0.355963	-2.88791	0.00387811	0.179936	Malectin-like carbohydrate-binding domain;CAAX prenyl protease 1-like protein;Malectin-like carbohydrate-binding domain-containing protein
BaRT2v18chr5HG265150	344.823	-0.775756	0.269035	-2.88348	0.00393311	0.179936	0
BaRT2v18chr5HG265410	220.545	-0.710829	0.245693	-2.89315	0.00381396	0.179936	Myosin XI-F;Myosin-12;IQ motif
BaRT2v18chr5HG269240	357.482	0.959272	0.332226	2.88741	0.00388428	0.179936	40S ribosomal protein S12
BaRT2v18chr7HG376850	23.6206	1.06047	0.367837	2.88299	0.00393917	0.179936	0
BaRT2v18chr2HG057770	21.8226	1.07168	0.372214	2.87922	0.00398661	0.18002	Non-reducing end alpha-L-arabinofuranosidase;Alpha-L-arabinofuranosidase C-terminus family protein, expressed;alpha-L-arabinofuranosidase 1-like isoform X1;Alpha-L-arabinofuranosidase 1-like protein;Alpha-L-arabinofuranosidase 1
BaRT2v18chr6HG286150	283.636	1.03413	0.359287	2.8783	0.00399826	0.18002	60S ribosomal protein L13
BaRT2v18chr6HG296810	51.8763	0.997187	0.346469	2.87814	0.00400023	0.18002	0
BaRT2v18chr7HG382170	93.505	-0.91676	0.318341	-2.8798	0.00397926	0.18002	Patatin
BaRT2v18chr1HG005970	131.941	-0.901677	0.313691	-2.87441	0.00404781	0.180027	Glycosyltransferase;UDP-glycosyltransferase 86A1
BaRT2v18chr2HG076470	572.693	1.07573	0.373979	2.87645	0.00402182	0.180027	40S ribosomal protein S15;Small subunit ribosomal protein S15e
BaRT2v18chr3HG120240	165.426	0.970887	0.337885	2.87342	0.00406053	0.180027	Mitochondrial glycoprotein family protein
BaRT2v18chr4HG200800	101.377	-0.795385	0.276778	-2.87373	0.00405656	0.180027	Phosphatidylinositol N-acetyglucosaminlytransferase subunit P-related
BaRT2v18chr5HG273510	8.80819	0.998836	0.347448	2.87478	0.00404307	0.180027	Glycosyltransferase
BaRT2v18chr6HG319790	52.8275	0.927692	0.322543	2.87619	0.00402513	0.180027	0
BaRT2v18chr7HG377450	251.617	0.962378	0.335074	2.87213	0.00407711	0.180317	0
BaRT2v18chr2HG104620	11.5003	1.02374	0.356758	2.86957	0.00411028	0.181337	0
BaRT2v18chr1HG025390	61.6869	0.823617	0.287101	2.86873	0.00412121	0.181374	0
BaRT2v18chr2HG093360	88.1471	-0.780349	0.27211	-2.86777	0.00413372	0.18148	Salutaridine reductase;(+)-neomenthol dehydrogenase;Carbonyl reductase 3;(+)-neomenthol dehydrogenase-like
BaRT2v18chr2HG056290	1669.52	0.936072	0.326531	2.86672	0.00414751	0.181641	Elongation factor 1-alpha
BaRT2v18chr2HG082680	19.2951	-1.05984	0.370005	-2.86439	0.00417814	0.182537	Purple acid phosphatase
BaRT2v18chr7HG382970	143.077	0.777039	0.271533	2.86167	0.00421414	0.183663	0
BaRT2v18chr1HG035510	248.312	1.01919	0.356646	2.85771	0.00426717	0.185524	40S ribosomal protein S23;Small subunit ribosomal protein S23e
BaRT2v18chr6HG305690	51.1352	-1.04818	0.366956	-2.85641	0.00428459	0.185831	Bisdemethoxycurcumin synthase;Type III polyketide synthase B;Chalcone and stilbene synthases, N-terminal domain containing protein;Chalcone synthase A
BaRT2v18chr3HG157340	654.336	-0.506577	0.177614	-2.85212	0.00434292	0.187907	Mannose-1-phosphate guanylyltransferase 1;Mannose-1-phosphate guanyltransferase beta
BaRT2v18chr6HG284130	17.8376	1.05449	0.370339	2.84735	0.00440842	0.190283	LigB domain-containing protein;4,5-DOPA dioxygenase extradiol
BaRT2v18chr1HG046040	41.8377	0.98268	0.345661	2.8429	0.00447054	0.192041	0
BaRT2v18chr3HG163570	3220.46	-0.49274	0.173315	-2.84303	0.00446872	0.192041	Stress enhanced protein 1, chloroplastic-like isoform X2
BaRT2v18chr7HG355880	33.2455	1.04329	0.367102	2.84196	0.00448377	0.192149	WHy domain-containing protein;Late embryogenesis abundant (LEA) hydroxyproline-rich glycoprotein family
BaRT2v18chr2HG079100	232.871	1.02934	0.362864	2.8367	0.00455827	0.194877	Ribosomal protein L13a;Large subunit ribosomal protein L13Ae
BaRT2v18chr2HG058230	190.138	-0.824439	0.29086	-2.83449	0.00458987	0.195458	0
BaRT2v18chr2HG058850	678.195	-0.873257	0.308111	-2.83423	0.00459364	0.195458	Non-specific serine/threonine protein kinase
BaRT2v18chr1HG046030	22.5114	1.01806	0.359511	2.83179	0.00462885	0.195681	0
BaRT2v18chr2HG060850	425.564	0.900568	0.31814	2.83073	0.0046442	0.195681	0
BaRT2v18chr2HG080410	2198.35	-0.5541	0.195788	-2.8301	0.00465337	0.195681	Cysteine proteinase 1;Cyseine protease
BaRT2v18chr3HG138390	489.718	0.717068	0.253126	2.83285	0.00461353	0.195681	0
BaRT2v18chr6HG297880	29.296	-0.950526	0.33579	-2.83071	0.00464444	0.195681	Group 13 allergen Sor h 13.02;Exopolygalacturonase
BaRT2v18chr1HG028440	124.125	0.940042	0.332256	2.82927	0.0046654	0.195729	RING-CH-type domain-containing protein;E3 ubiquitin-protein ligase MARCH1
BaRT2v18chr5HG224420	165.078	0.98432	0.34809	2.82778	0.00468722	0.196186	60S ribosomal protein L36
BaRT2v18chr1HG021510	458.534	-0.588281	0.208101	-2.8269	0.00470012	0.196268	Aquaporin NIP;Nodulin-26 like Intrinsic Protein 31;MIP domain-containing protein;Nodulin-26
BaRT2v18chr1HG017920	317.796	1.04073	0.368428	2.82479	0.00473113	0.197105	0
BaRT2v18chr3HG142410	14263.3	-0.742365	0.263163	-2.82093	0.00478847	0.199032	0
BaRT2v18chr4HG175500	1390.04	0.581131	0.206065	2.82013	0.0048004	0.199067	5-methyltetrahydropteroyltriglutamate--homocysteine S-methyltransferase;5-methyltetrahydropteroyltriglutamate--homocysteine methyltransferase 2
BaRT2v18chr1HG001510	111.294	0.93694	0.332475	2.81808	0.00483122	0.199884	FT-interacting protein 1;C2 calcium/lipid-binding plant phosphoribosyltransferase family protein;FT-interacting protein 1-like
BaRT2v18chr4HG198950	877.703	0.982705	0.348859	2.81691	0.00484879	0.200149	0
BaRT2v18chr1HG025040	51.6513	0.932627	0.331279	2.81523	0.0048743	0.20074	0
BaRT2v18chr5HG221760	45.5827	1.05065	0.373539	2.8127	0.00491272	0.201818	0
BaRT2v18chr6HG287820	162.808	0.674055	0.239704	2.81203	0.00492293	0.201818	0
BaRT2v18chr2HG076770	26.9257	-1.04079	0.370306	-2.81062	0.00494454	0.202242	0
BaRT2v18chr1HG019980	10.8892	1.03095	0.36691	2.80981	0.00495709	0.202294	leucine-rich repeat receptor-like protein kinase PXC1;Protein kinase domain-containing protein;probable leucine-rich repeat receptor-like protein kinase At1g68400;Putative inactive receptor kinase
BaRT2v18chr7HG370190	14572.6	-0.608453	0.216631	-2.8087	0.00497419	0.202532	Fructose-bisphosphate aldolase
BaRT2v18chr1HG002840	2172.98	0.760591	0.271116	2.8054	0.00502536	0.203712	Outer envelope pore protein 16, chloroplastic;Amino acid selective channel protein;Mitochondrial inner membrane translocase subunit Tim17/Tim22/Tim23/peroxisomal protein PMP24
BaRT2v18chr1HG045960	301.806	0.654312	0.233324	2.80431	0.0050424	0.203712	GTPase ERA-like, chloroplastic;GTP-binding protein era, putative;Era-type G domain-containing protein;GTPase Era;GTP-binding protein ERG
BaRT2v18chr1HG048210	317.888	0.75944	0.27076	2.80484	0.00503415	0.203712	0
BaRT2v18chr5HG251430	51.0851	-1.02004	0.363789	-2.80392	0.00504855	0.203712	ARP protein (REF);Zinc-binding alcohol dehydrogenase domain-containing protein 2;Prostaglandin reductase-3;probable quinone oxidoreductase
BaRT2v18chr1HG033300	1722.25	-0.481078	0.171664	-2.80243	0.00507188	0.203737	Aldedh domain-containing protein;Aldehyde dehydrogenase 2C4;Aldehyde dehydrogenase3
BaRT2v18chr2HG081450	16.7531	1.02103	0.364314	2.80261	0.00506906	0.203737	0
BaRT2v18chr3HG148400	64.947	1.04759	0.373924	2.80163	0.00508456	0.203791	rRNA methyltransferase 1, mitochondrial;tRNA/rRNA methyltransferase, SpoU;RNA methyltransferase TrmH family;tRNA/rRNA methyltransferase
BaRT2v18chr2HG053240	49.1168	1.02138	0.365048	2.79794	0.00514302	0.204763	Cytochrome P450 family 93 subfamily D polypeptide 1;Flavone synthase II;3,9-dihydroxypterocarpan 6A-monooxygenase;licodione synthase-like
BaRT2v18chr3HG143400	81.0446	-0.79307	0.283369	-2.79872	0.0051306	0.204763	Putative small GTPase superfamily, P-loop containing nucleoside triphosphate hydrolase
BaRT2v18chr7HG331760	19.4197	1.02715	0.367081	2.79817	0.00513927	0.204763	Putative O-methyltransferase 2;O-methyltransferase ZRP4;O-methyltransferase family protein, expressed
BaRT2v18chr1HG001900	27.7453	1.02997	0.368394	2.79584	0.00517644	0.20511	0
BaRT2v18chr2HG095170	26.8611	1.01085	0.361632	2.79525	0.005186	0.20511	0
BaRT2v18chr7HG333210	20.368	-1.04184	0.372674	-2.79559	0.00518055	0.20511	Putative E3 ubiquitin-protein ligase XBOS36;E3 ubiquitin-protein ligase XBAT33;26S proteasome regulatory complex, subunit PSMD10
BaRT2v18chr4HG190610	65.3474	0.858798	0.307686	2.79115	0.00525215	0.20727	0
BaRT2v18chr1HG031140	12.419	-1.04493	0.37465	-2.78908	0.00528585	0.208088	0
BaRT2v18chr2HG078850	2795.54	-0.630269	0.226381	-2.7841	0.00536758	0.208088	Peroxidase
BaRT2v18chr2HG091890	98.6315	1.00403	0.360617	2.78419	0.00536622	0.208088	(3R)-hydroxymyristoyl-[acyl-carrier-protein] dehydratase
BaRT2v18chr5HG224530	180.495	0.720997	0.258785	2.78609	0.0053348	0.208088	0
BaRT2v18chr5HG232840	314.708	-0.647844	0.232635	-2.78481	0.0053559	0.208088	Polyol transporter 5;Sugar transporter family protein, expressed;MFS domain-containing protein
BaRT2v18chr5HG274070	387.301	0.98884	0.354945	2.78589	0.00533803	0.208088	40S ribosomal protein S26
BaRT2v18chr6HG309580	253.854	0.745383	0.26754	2.78607	0.00533519	0.208088	beta-xylosidase/alpha-L-arabinofuranosidase 1-like;probable beta-D-xylosidase 5;Putative beta-D-xylosidase 2;Putative beta-D-xylosidase 7
BaRT2v18chr7HG348180	106.058	0.721953	0.259367	2.78352	0.0053772	0.208088	serine/threonine-protein kinase D6PK;Protein kinase domain-containing protein;serine/threonine-protein kinase D6PKL2
BaRT2v18chr7HG374110	202.84	0.985233	0.35354	2.78677	0.00532367	0.208088	60S acidic ribosomal protein P3
BaRT2v18chr5HG265480	272.098	-0.794356	0.285478	-2.78255	0.00539333	0.208264	NDH-dependent cyclic electron flow 5
BaRT2v18chr2HG049860	123.56	1.01547	0.365378	2.77924	0.00544863	0.209948	Cytochrome P450 family 96 subfamily A polypeptide 1;Cytochrome P450 family protein, expressed;Alkane hydroxylase MAH1
BaRT2v18chr1HG014580	41.2888	-0.925041	0.333527	-2.77351	0.00554548	0.210929	0
BaRT2v18chr2HG098290	19.681	1.02891	0.370943	2.77376	0.00554123	0.210929	Cold acclimation protein WCS19;Cold responsive protein
BaRT2v18chr3HG155820	442.872	-0.67385	0.24282	-2.7751	0.00551845	0.210929	Actin-7;Actin
BaRT2v18chr4HG187740	178.782	-0.607491	0.218924	-2.77489	0.00552202	0.210929	glycine-rich protein A3;glycine-rich protein A3-like;Rhodopsin;glycine-rich protein A3-like isoform X1
BaRT2v18chr5HG232970	254.593	0.990631	0.357304	2.77251	0.00556252	0.210929	0
BaRT2v18chr5HG280750	56.2034	1.03765	0.373835	2.77569	0.00550852	0.210929	Smr domain-containing protein;Pentatricopeptide repeat-containing protein, chloroplastic;Salt-inducible protein;Pentatricopeptide, putative, expressed
BaRT2v18chr6HG312500	222.051	1.0086	0.363483	2.77482	0.00552328	0.210929	Large subunit ribosomal protein L12e;60S ribosomal protein L12
BaRT2v18chr7HG347820	83.1286	-0.785941	0.283509	-2.77219	0.00556809	0.210929	Serine/threonine-protein kinase PBS1 isoform 1;Putative leucine-rich repeat receptor-like serine/threonine-protein kinase At5g15730 (Fragment);Protein kinase domain-containing protein
BaRT2v18chr5HG237300	125.287	1.01267	0.365396	2.77144	0.00558087	0.210969	Stress-response A/B barrel domain-containing protein;Pop3 peptide
BaRT2v18chr4HG192800	53.0289	1.03307	0.372916	2.77026	0.00560108	0.211028	0
BaRT2v18chr7HG378290	495.827	0.68701	0.24802	2.76998	0.00560596	0.211028	Auxin response factor
BaRT2v18chr4HG181620	23.2071	1.02645	0.371108	2.7659	0.00567665	0.213242	thioredoxin-like protein CITRX, chloroplastic;Thioredoxin-like protein CITRX;Thioredoxin domain-containing protein;Thioredoxin, conserved site
BaRT2v18chr4HG216550	286.082	1.02481	0.371238	2.76051	0.00577115	0.216051	0
BaRT2v18chr5HG245940	125.153	0.827523	0.299872	2.75958	0.00578751	0.216051	probable serine/threonine-protein kinase PBL28;Serine/threonine-protein kinase CDL1;Serine/threonine-protein kinase PBS1;Protein kinase domain-containing protein;Trichome birefringence-like 27
BaRT2v18chr6HG319360	49.359	0.941317	0.341057	2.76	0.00578016	0.216051	Glucan endo-1,3-beta-D-glucosidase
BaRT2v18chr5HG236060	45.9387	0.893655	0.324246	2.7561	0.0058495	0.217912	0
BaRT2v18chr7HG331180	20374	0.848854	0.308143	2.75474	0.00587382	0.218365	RuBisCO large subunit-binding protein subunit beta, chloroplastic;Chaperonin 60 subunit beta 2 chloroplastic;Putative chaperonin Cpn60/TCP-1 family, groEL-like apical domain, groEL-like equatorial
BaRT2v18chr6HG282900	96.1112	1.02175	0.371525	2.75015	0.00595683	0.220538	0
BaRT2v18chr6HG319210	26.4633	0.995642	0.361972	2.7506	0.00594856	0.220538	0
BaRT2v18chr1HG046250	114.499	-0.816845	0.297304	-2.74751	0.00600499	0.220813	salutaridine reductase;Short-chain dehydrogenase/reductase;(+)-neomenthol dehydrogenase-like isoform X2;(+)-neomenthol dehydrogenase;(-)-isopiperitenone reductase;Short-chain dehydrogenase/reductase 2
BaRT2v18chr2HG091760	63.6824	0.924938	0.336615	2.74776	0.00600035	0.220813	0
BaRT2v18chr3HG127960	256.843	0.827262	0.301017	2.74823	0.00599187	0.220813	Pentatricopeptide repeat-containing protein;Pentatricopeptide, putative;Putative tetratricopeptide-like helical domain, DYW domain-containing protein
BaRT2v18chr5HG248880	41.86	-0.952597	0.346771	-2.74705	0.00601344	0.220813	0
BaRT2v18chr7HG359860	148.88	1.01019	0.36819	2.74366	0.00607586	0.222649	0
BaRT2v18chr6HG304150	1868.87	-0.529809	0.193258	-2.74146	0.00611674	0.223691	Photosynthetic NDH subcomplex L 2;Oxygen evolving enhancer protein 3;PsbQ-like protein 1, chloroplastic
BaRT2v18chr2HG094520	44.8168	0.90261	0.32971	2.73759	0.00618918	0.224371	0
BaRT2v18chr3HG117840	11.9825	-1.02223	0.37321	-2.73903	0.00616208	0.224371	SIAH-type domain-containing protein;RING-type E3 ubiquitin transferase
BaRT2v18chr3HG172240	611.279	0.829581	0.303085	2.73713	0.00619781	0.224371	0
BaRT2v18chr5HG264300	63.14	0.80121	0.292591	2.73832	0.00617531	0.224371	Leucine-rich repeat extensin-like protein 6;Systemin receptor SR160
BaRT2v18chr7HG368740	919.933	0.746688	0.272734	2.73779	0.00618543	0.224371	Pleiotropic drug resistance protein 12;ABC-2 and Plant PDR ABC-type transporter family protein;ABC transporter domain-containing protein
BaRT2v18chr3HG158570	20.9983	-1.01821	0.372243	-2.73532	0.00623192	0.225152	RING-H2 finger protein ATL66;RING-H2 finger protein ATL57;RING-H2 finger protein ATL74;RING-type domain-containing protein;Basic helix-loop-helix DNA-binding superfamily protein isoform 1
BaRT2v18chr5HG239020	17.5767	0.956743	0.350046	2.73319	0.00627242	0.22616	Myb-like DNA-binding domain containing protein, expressed;Transcription factor myb30;MYB transcription factor
BaRT2v18chr1HG012280	1156.26	0.865053	0.317093	2.72807	0.00637059	0.228781	60S ribosomal protein L10;Large subunit ribosomal protein L10e
BaRT2v18chr3HG152250	46.1476	-0.835501	0.306208	-2.72854	0.0063616	0.228781	Peroxidase
BaRT2v18chr1HG039070	26.1343	1.0145	0.372152	2.72604	0.00641001	0.229279	Carboxypeptidase
BaRT2v18chr1HG046060	30.1935	0.957905	0.351345	2.72639	0.00640304	0.229279	0
BaRT2v18chr1HG010280	67.1227	0.775386	0.284956	2.72107	0.00650705	0.230242	0
BaRT2v18chr1HG018110	10.0842	1.01331	0.372301	2.72176	0.0064936	0.230242	Peptide transporter PTR3-A
BaRT2v18chr4HG219140	117.118	0.662133	0.243293	2.72154	0.00649785	0.230242	Phosphatidylserine decarboxylase proenzyme 1, mitochondrial
BaRT2v18chr6HG283220	31740.6	-0.491481	0.180461	-2.72348	0.00645988	0.230242	0
BaRT2v18chr6HG325640	2205.47	-0.786937	0.289215	-2.72094	0.00650967	0.230242	Glutathione S-transferase U16
BaRT2v18chr6HG326200	17.4629	-1.00326	0.368747	-2.72073	0.00651387	0.230242	White-brown complex like protein 30;ABC transporter domain-containing protein;Transporter, ABC superfamily (Breast cancer resistance protein)
BaRT2v18chr2HG082750	237.79	0.993716	0.365624	2.71787	0.00657044	0.231786	0
BaRT2v18chr1HG031160	2591.29	0.854642	0.314746	2.71534	0.00662079	0.233104	0
BaRT2v18chr2HG086750	52.1269	0.88485	0.32634	2.71144	0.0066992	0.235403	Amino acid/polyamine transporter II
BaRT2v18chr7HG353830	428.378	1.01172	0.373312	2.71011	0.00672612	0.235887	0
BaRT2v18chr7HG362040	220.201	0.878328	0.32426	2.70871	0.00675443	0.236418	40S ribosomal protein S13;Ribosomal protein S15
BaRT2v18chr1HG001700	17.7223	-1.00857	0.372674	-2.70632	0.00680333	0.237203	Disease resistance protein RPM1
BaRT2v18chr1HG047680	53.4758	0.773749	0.28604	2.70504	0.0068297	0.237203	0
BaRT2v18chr2HG090260	95.0897	1.00836	0.372559	2.70659	0.00679783	0.237203	0
BaRT2v18chr6HG289020	141.278	0.807318	0.298423	2.70528	0.00682465	0.237203	0
BaRT2v18chr2HG097020	175.703	-0.714482	0.264465	-2.70161	0.00690046	0.237864	0
BaRT2v18chr5HG265440	1790.18	-0.649192	0.240165	-2.7031	0.00686955	0.237864	0
BaRT2v18chr6HG293640	112.418	0.670453	0.248165	2.70164	0.00689985	0.237864	0
BaRT2v18chr6HG325880	14.9883	1.00753	0.372945	2.70155	0.00690172	0.237864	0
BaRT2v18chr4HG205430	335.167	0.658215	0.243951	2.69814	0.00697277	0.238029	GTP-binding protein At2g22870;EngB-type G domain-containing protein;GTP-binding ribosome biogenesis protein;Putative GTP-binding protein, ribosome biogenesis, YsxC;GTP-binding protein, putative, expressed;GTP-binding protein engB, putative
BaRT2v18chr4HG213110	175.303	-0.923942	0.342407	-2.69837	0.0069679	0.238029	Outer arm dynein light chain 1 protein;Leucine-rich repeat family protein, putative, expressed;Dynein assembly factor 1, axonemal
BaRT2v18chr5HG232450	7.62326	0.925899	0.343114	2.69852	0.00696485	0.238029	0
BaRT2v18chr5HG272430-BaRT2v18chr5HG272440	9908.13	0.695579	0.257799	2.69815	0.00697266	0.238029	Chlorophyll a-b binding protein, chloroplastic
BaRT2v18chr7HG333050	6534.27	0.767567	0.284413	2.69877	0.00695955	0.238029	Stem 28 kDa glycoprotein;Acid phosphatase 1
BaRT2v18chr1HG001680	74.6275	-0.74318	0.275638	-2.69621	0.00701326	0.238504	Protein kinase domain-containing protein
BaRT2v18chr6HG315220	28.1105	1.00616	0.373129	2.69654	0.00700643	0.238504	Putative somatic embryogenesis protein kinase 1;Protein kinase domain-containing protein;BRASSINOSTEROID INSENSITIVE 1-associated receptor kinase 1
BaRT2v18chr1HG019180	550.507	0.683221	0.253907	2.69083	0.00712743	0.240378	0
BaRT2v18chr2HG078910	22.3184	1.00432	0.373039	2.69226	0.00709691	0.240378	0
BaRT2v18chr3HG132450	91.236	0.816676	0.303545	2.69046	0.0071353	0.240378	protein TRIGALACTOSYLDIACYLGLYCEROL 4, chloroplastic;tRNA(Ile)-lysidine synthase (Fragment)
BaRT2v18chr3HG157500	129.969	0.980075	0.364208	2.69098	0.00712433	0.240378	S5 DRBM domain-containing protein;40S ribosomal protein S2-4;Double-stranded RNA-binding-like domain-containing protein
BaRT2v18chr3HG171970	282.04	0.848502	0.315152	2.69236	0.00709493	0.240378	0
BaRT2v18chr1HG015080	15.7489	1.00236	0.373074	2.68676	0.00721488	0.241218	0
BaRT2v18chr1HG017140	22.1731	-0.952734	0.3549	-2.68452	0.00726349	0.241218	0
BaRT2v18chr1HG024610	27.789	1.00562	0.374523	2.68508	0.00725123	0.241218	0
BaRT2v18chr2HG075140	70.5248	0.988569	0.368328	2.68393	0.00727619	0.241218	40S ribosomal protein S12
BaRT2v18chr3HG172360	349.034	0.740502	0.275788	2.68504	0.00725202	0.241218	DEAD-box ATP-dependent RNA helicase 58, chloroplastic;DEAD-box ATP-dependent RNA helicase 58ic isoform X2
BaRT2v18chr5HG253350	18.1727	1.00176	0.373274	2.6837	0.00728114	0.241218	0
BaRT2v18chr6HG305210	191.319	0.973558	0.362405	2.68638	0.00722303	0.241218	0
BaRT2v18chr7HG365980	12.7529	0.960463	0.357357	2.68769	0.00719488	0.241218	Glycoside hydrolase
BaRT2v18chr7HG378750	607.365	0.54886	0.204274	2.68688	0.00721232	0.241218	0
BaRT2v18chr3HG146820	251.776	0.69929	0.260696	2.68239	0.00730972	0.241719	Brassinosteroid insensitive 1 (Fragment);Systemin receptor SR160
BaRT2v18chr7HG381140	8.59641	0.950938	0.354814	2.6801	0.00735994	0.242932	0
BaRT2v18chr6HG298990	251.331	-0.710449	0.265248	-2.67843	0.00739688	0.243703	Limonoid UDP-glucosyltransferase;Glycosyltransferase;Cinnamate beta-D-glucosyltransferase
BaRT2v18chr5HG272250	26.8156	0.94596	0.353271	2.67772	0.0074125	0.243771	AAI domain-containing protein
BaRT2v18chr1HG002030	808.778	0.516974	0.193316	2.67425	0.00748972	0.244414	ABC transporter D family member 1
BaRT2v18chr1HG023960	1105.6	0.879464	0.328932	2.67369	0.00750212	0.244414	0
BaRT2v18chr3HG142280	292.783	0.80105	0.29994	2.6707	0.00756932	0.244414	0
BaRT2v18chr3HG145900	53.4466	-0.993362	0.37158	-2.67335	0.00750984	0.244414	Putative ABC-2 type transporter family protein;ABC transporter domain-containing protein;AAA+ ATPase domain-containing protein
BaRT2v18chr3HG147790	656.372	-0.832432	0.311093	-2.67583	0.00745444	0.244414	BURP domain-containing protein;Dehydration-responsive protein RD22-like
BaRT2v18chr4HG186730	1447.6	0.827053	0.3096	2.67136	0.00755454	0.244414	0
BaRT2v18chr6HG290450	24.5679	0.995565	0.372441	2.67308	0.00751589	0.244414	Protein ACCELERATED CELL DEATH 6-like
BaRT2v18chr6HG308060	196.065	0.855093	0.320184	2.67063	0.00757093	0.244414	DEAD-box ATP-dependent RNA helicase 47, mitochondrial
BaRT2v18chr6HG317840	121.434	-0.746786	0.27968	-2.67015	0.00758177	0.244414	0
BaRT2v18chr7HG338260	593.024	-0.59423	0.222239	-2.67383	0.00749893	0.244414	Putative Multidrug resistance-associated protein 14;Multidrug resistance-associated protein3;ABC transporter C family member 10;Multidrug-resistance associated protein 3;MRP-like ABC transporter-like
BaRT2v18chr7HG362600	85.7676	-0.956139	0.357939	-2.67123	0.0075573	0.244414	0
BaRT2v18chr7HG374640	122.628	-0.831318	0.311469	-2.66902	0.00760729	0.244796	Peroxidase
BaRT2v18chr1HG000090	174.273	0.58497	0.219509	2.66491	0.00770097	0.246611	0
BaRT2v18chr2HG087000	149.937	0.761669	0.285833	2.66474	0.0077049	0.246611	Prohibitin
BaRT2v18chr5HG253430	207.219	0.771846	0.289717	2.66414	0.00771862	0.246611	0
BaRT2v18chr6HG307650	141.002	0.655093	0.245887	2.6642	0.0077171	0.246611	Putative homeodomain-like transcription factor superfamily protein
BaRT2v18chr4HG206790	301.848	0.828426	0.311053	2.66329	0.00773806	0.246793	0
BaRT2v18chr4HG195930	1941.38	0.701432	0.263495	2.66204	0.00776696	0.247276	0
BaRT2v18chr5HG264330	147.506	0.786543	0.295634	2.66053	0.00780177	0.247506	0
BaRT2v18chr7HG358050	126.733	0.663978	0.249547	2.66074	0.00779699	0.247506	0
BaRT2v18chr2HG096640	162.945	-0.758238	0.285104	-2.65951	0.00782542	0.247819	Putative glycerol-3-phosphate transporter 1;Phosphate starvation-induced protein 3 isoform 1;Glycerol 3-phosphate permease;MFS domain-containing protein
BaRT2v18chr5HG242500	716.011	0.99268	0.373442	2.65819	0.00785624	0.248357	60S ribosomal protein L17;Ribosomal protein L17b;Ribosomal protein L17-1
BaRT2v18chr7HG329660	91.6134	-0.786567	0.295994	-2.65737	0.00787518	0.248518	probable polygalacturonase;Polygalacturonase/glycoside hydrolase family protein;Exo-polygalacturonase, family GH28
BaRT2v18chr6HG318590	143.86	-0.744699	0.280567	-2.65427	0.00794804	0.250377	1,8-cineole synthase, chloroplastic;Beta-klotho (Fragment);1,8-cineole synthase
BaRT2v18chr1HG044370	63.0031	0.87835	0.331163	2.65232	0.00799401	0.251384	exosome complex component RRP41 homolog;3'-5'-exoribonuclease family protein isoform 2;Putative polyribonucleotide nucleotidyltransferase, PNPase/RNase PH domain-containing protein
BaRT2v18chr1HG028490	468.994	0.512836	0.193551	2.64962	0.00805824	0.252695	AMP deaminase
BaRT2v18chr2HG059210	379.3	-0.520415	0.19656	-2.64762	0.00810606	0.252695	ABC transporter domain-containing protein
BaRT2v18chr5HG235980	34.602	0.988397	0.373177	2.6486	0.00808262	0.252695	0
BaRT2v18chr5HG278860	99.8198	-0.861721	0.325372	-2.64842	0.00808694	0.252695	Putative acyl-activating enzyme 16, chloroplastic;AMP-binding domain-containing protein;AMP-binding protein, putative, expressed
BaRT2v18chr6HG322420	12636.8	0.747398	0.282277	2.64774	0.0081031	0.252695	0
BaRT2v18chr2HG090170	274.436	0.664866	0.251389	2.64477	0.00817473	0.253516	6,7-dimethyl-8-ribityllumazine synthase;6,7-dimethyl-8-ribityllumazine synthase, chloroplastic
BaRT2v18chr3HG134610	265.748	0.788463	0.298067	2.64525	0.00816299	0.253516	ATP-dependent Clp protease proteolytic subunit
BaRT2v18chr4HG202150	18.8737	-0.991199	0.374657	-2.64562	0.00815421	0.253516	0
BaRT2v18chr5HG241250	26.6324	-0.900307	0.340755	-2.64209	0.00823957	0.255086	cyclase-like protein 3;cyclase-like protein 2;Cyclase domain-containing protein;Kynurenine formamidase;Putative arylformamidase
BaRT2v18chr6HG300550	42.114	0.897787	0.33989	2.64141	0.00825624	0.255162	0
BaRT2v18chr7HG365230	11.8894	-0.987949	0.374131	-2.64065	0.00827478	0.255295	0
BaRT2v18chr1HG031150	9.22597	0.926366	0.351287	2.63706	0.00836272	0.256596	0
BaRT2v18chr3HG123540	247.379	0.887428	0.336624	2.63626	0.00838257	0.256596	0
BaRT2v18chr5HG250000	58.5917	0.829013	0.314457	2.63633	0.00838083	0.256596	probable cadmium/zinc-transporting ATPase HMA1, chloroplastic;Putative cadmium/zinc-transporting ATPase HMA1 chloroplastic
BaRT2v18chr5HG263800	267.832	0.645949	0.244849	2.63815	0.008336	0.256596	0
BaRT2v18chr6HG298650	96.7327	-0.748293	0.283872	-2.63602	0.00838839	0.256596	0
BaRT2v18chr2HG054450	1959.32	0.695655	0.264268	2.63238	0.00847881	0.258921	0
BaRT2v18chr1HG005030	139.619	-0.648189	0.246411	-2.63053	0.00852528	0.259193	0
BaRT2v18chr5HG278870	7.76155	-0.86943	0.330545	-2.6303	0.00853103	0.259193	0
BaRT2v18chr6HG284470	33.1707	-0.943785	0.358766	-2.63064	0.00852235	0.259193	Protein kinase domain-containing protein
BaRT2v18chr7HG354870	404.582	0.745717	0.283722	2.62834	0.00858027	0.260249	0
BaRT2v18chr7HG354510	81.2367	0.735738	0.28002	2.62744	0.00860292	0.260496	0
BaRT2v18chr7HG356970	25.8225	0.974777	0.371128	2.62653	0.00862616	0.26076	Ultraviolet-B receptor UVR8;Putative E3 ubiquitin-protein ligase HERC4 (Fragment)
BaRT2v18chr4HG187470	463.497	0.978362	0.372664	2.62532	0.00865682	0.261247	40S ribosomal protein S16;Putative ribosomal protein S9;Small subunit ribosomal protein S16e
BaRT2v18chr5HG273890	32.0875	0.977398	0.372693	2.62253	0.00872802	0.262953	DNA gyrase subunit A chloroplastic/mitochondrial;DNA topoisomerase (ATP-hydrolyzing)
BaRT2v18chr2HG064210	246.521	0.922739	0.352471	2.61791	0.0088469	0.266089	0
BaRT2v18chr3HG144780	133.335	-0.72383	0.276654	-2.61638	0.00888682	0.266842	0
BaRT2v18chr4HG208040	739.39	0.97404	0.372835	2.61253	0.00898759	0.269156	0
BaRT2v18chr5HG278260	439.42	0.504804	0.193242	2.61229	0.00899384	0.269156	Prohibitin
BaRT2v18chr1HG023480	1697.5	-0.592391	0.226949	-2.61024	0.00904795	0.269875	0
BaRT2v18chr1HG039240	295.501	-0.917243	0.351399	-2.61026	0.00904738	0.269875	Tyrosine/DOPA decarboxylase 2
BaRT2v18chr3HG117110	63.5767	0.972037	0.372513	2.60941	0.00906994	0.270083	0
BaRT2v18chr3HG127940	218.128	0.928236	0.355898	2.60815	0.00910319	0.270287	0
BaRT2v18chr4HG207400	285.933	-0.534374	0.204897	-2.60801	0.0091069	0.270287	CK2 catalytic alpha subunit;Protein kinase domain-containing protein
BaRT2v18chr4HG213320	238.024	0.790588	0.303314	2.6065	0.00914727	0.27059	Chaperonin CPN60-2, mitochondrial
BaRT2v18chr7HG376970	70.7181	0.923713	0.354319	2.60701	0.00913363	0.27059	0
BaRT2v18chr4HG196160	521.162	0.774891	0.297584	2.60394	0.00921583	0.27217	Ribosomal protein L19
BaRT2v18chr6HG320830	18.5958	0.975456	0.374719	2.60316	0.00923677	0.272341	0
BaRT2v18chr2HG100860	204.584	0.725204	0.27883	2.60088	0.00929836	0.272933	0
BaRT2v18chr5HG241450	744.584	0.820319	0.31539	2.60097	0.00929616	0.272933	0
BaRT2v18chr7HG361190	16.8354	-0.968709	0.372475	-2.60073	0.00930247	0.272933	Purine-uracil permease NCS1;Uracil permease, putative;Nucleobase cation symporter 1;Permease cytosine/purines uracil thiamine allantoin
BaRT2v18chr5HG255320	10.2412	-0.967435	0.372075	-2.60011	0.00931943	0.272985	0
BaRT2v18chr2HG079860	599.047	-0.57107	0.219743	-2.59881	0.00935467	0.273571	0
BaRT2v18chr4HG175270	1656.13	-0.552692	0.212768	-2.59763	0.00938693	0.274068	0
BaRT2v18chr6HG319950	370.061	-0.747055	0.287689	-2.59675	0.00941113	0.274328	Armadillo;Coatomer beta subunit;ARM repeat superfamily protein
BaRT2v18chr1HG045300	245.665	0.956682	0.368527	2.59596	0.00943269	0.274511	0
BaRT2v18chr4HG211370	280.812	0.956137	0.368993	2.59121	0.00956401	0.277883	60S ribosomal protein L4-1
BaRT2v18chrUnG391970	23.3719	-0.957185	0.369484	-2.5906	0.00958084	0.277922	0
BaRT2v18chr2HG089050	103.797	0.808724	0.312259	2.58991	0.00960003	0.278029	0
BaRT2v18chr4HG182890	244.788	-0.628031	0.242553	-2.58925	0.00961852	0.278116	0
BaRT2v18chr2HG054800	365.788	0.594551	0.229738	2.58796	0.00965471	0.278714	Aquaporin PIP;Plasma membrane intrinsic protein
BaRT2v18chr5HG271360	101.678	0.690399	0.266892	2.58681	0.00968698	0.279196	ABC transporter domain-containing protein
BaRT2v18chr3HG173430	136.214	0.88681	0.342902	2.58619	0.00970431	0.279248	0
BaRT2v18chr2HG069270	174.383	0.584323	0.226022	2.58525	0.00973075	0.279561	0
BaRT2v18chr1HG048790	91.9444	-0.809714	0.313601	-2.58199	0.0098232	0.280422	Strigolactone esterase D14;AB hydrolase-1 domain-containing protein;Esterase/ lipase
BaRT2v18chr2HG079550	174.69	-0.716073	0.277226	-2.58299	0.00979473	0.280422	Potassium transporter
BaRT2v18chr3HG117910	1037.65	0.59027	0.228581	2.58232	0.00981391	0.280422	Pentatricopeptide repeat-containing protein;DYW domain containing protein
BaRT2v18chr6HG286950	9.73162	-0.961317	0.372314	-2.58201	0.00982275	0.280422	E3 ubiquitin-protein ligase UBR3 (Fragment);DEP domain-containing mTOR-interacting protein;Transmembrane protein
BaRT2v18chr2HG106260	221.162	-0.57042	0.221024	-2.58081	0.00985688	0.280485	COP9 signalosome complex subunit 5;JAB1/MPN/MOV34 metalloenzyme domain containing protein;MPN domain-containing protein;Putative proteasome endopeptidase complex;COP9 signalosome, subunit CSN5
BaRT2v18chr3HG116630	76.5916	-0.849618	0.329226	-2.58065	0.00986141	0.280485	0
BaRT2v18chr4HG204960	165.759	0.880167	0.341114	2.58027	0.00987227	0.280485	DNA-directed RNA polymerase subunit beta
BaRT2v18chr3HG116430	17.0318	-0.949835	0.368362	-2.57854	0.00992201	0.281453	Putative rust resistance kinase Lr10;Protein kinase domain-containing protein
BaRT2v18chr1HG030720	1162.4	0.476967	0.185408	2.57252	0.0100961	0.281736	0
BaRT2v18chr2HG107000	233.573	0.821027	0.318747	2.57579	0.0100011	0.281736	0
BaRT2v18chr3HG117770	29.4936	-0.894138	0.347224	-2.5751	0.010021	0.281736	0
BaRT2v18chr3HG122390	404.985	-0.666331	0.25886	-2.5741	0.0100501	0.281736	0
BaRT2v18chr3HG142150	535.836	0.71978	0.279607	2.57426	0.0100455	0.281736	0
BaRT2v18chr3HG149720	37.6145	0.885332	0.344261	2.57169	0.0101203	0.281736	DUF642 domain-containing protein
BaRT2v18chr4HG175600	329.866	0.813903	0.31648	2.57173	0.010119	0.281736	NusB domain-containing protein;N utilization substance protein like
BaRT2v18chr5HG252760	56.5238	0.938852	0.364779	2.57376	0.0100601	0.281736	Putative 28S rRNA (Cytosine-C(5))-methyltransferase (Fragment);NOL1/NOP2/sun family protein / antitermination NusB domain-containing protein;Ribosomal RNA small subunit methyltransferase B
BaRT2v18chr5HG263980	110.175	0.74094	0.287645	2.57589	0.00999834	0.281736	Pyruvate dehydrogenase E1 component subunit beta
BaRT2v18chr7HG341150	72.0907	-0.821095	0.319092	-2.57322	0.0100757	0.281736	0
BaRT2v18chr7HG355850	318.14	0.921733	0.357951	2.57502	0.0100233	0.281736	0
BaRT2v18chr7HG366950	65.8558	0.739518	0.287272	2.57428	0.0100449	0.281736	Exonuclease/helicase-like;Argonaute;Eukaryotic translation initiation factor 2c, putative
BaRT2v18chr5HG243600	7.72074	0.819555	0.319062	2.56864	0.0102099	0.283792	0
BaRT2v18chr6HG286230	11.2284	0.930687	0.36258	2.56685	0.0102627	0.284819	Glutamate receptor;PBPe domain-containing protein
BaRT2v18chr3HG121240	845.035	-0.587818	0.229494	-2.56137	0.0104262	0.286696	0
BaRT2v18chr3HG146050	32.9388	0.942221	0.367569	2.56339	0.0103656	0.286696	0
BaRT2v18chr4HG189710	20.9075	0.924352	0.360584	2.56348	0.0103628	0.286696	Importin N-terminal domain-containing protein;ARM repeat superfamily protein;Importin-beta
BaRT2v18chr4HG201000	203.008	0.609619	0.237992	2.5615	0.010422	0.286696	Arginine biosynthesis bifunctional protein ArgJ, chloroplastic
BaRT2v18chr5HG247150	24.4094	0.951896	0.371507	2.56225	0.0103995	0.286696	0
BaRT2v18chr6HG288000	882.193	0.804137	0.31376	2.5629	0.0103801	0.286696	0
BaRT2v18chr5HG241680	54.7235	0.958302	0.37472	2.55738	0.0105464	0.289558	0
BaRT2v18chr3HG128400	2013.72	-0.530332	0.207528	-2.55547	0.0106044	0.290706	0
BaRT2v18chr7HG332020	37.5489	0.871795	0.341222	2.55492	0.0106212	0.290722	0
BaRT2v18chr2HG092840	60.1022	0.846933	0.33177	2.55277	0.010687	0.292079	GRAM domain-containing protein
BaRT2v18chr2HG062100	91.2628	-0.700539	0.27466	-2.55056	0.0107549	0.292598	0
BaRT2v18chr2HG069010	29.7284	0.873207	0.34233	2.55078	0.0107484	0.292598	NEP-interacting protein 1;tRNA-splicing ligase RtcB;Carboxyl-terminal peptidase
BaRT2v18chr3HG120050	47.0771	-0.838334	0.32859	-2.5513	0.0107321	0.292598	0
BaRT2v18chr3HG123040	240.82	-0.82197	0.322656	-2.54751	0.0108494	0.294609	Galactinol--sucrose galactosyltransferase;galactinol--sucrose galactosyltransferase-like;Stachyose synthase;Raffinose synthase
BaRT2v18chr7HG329720	693.77	0.953058	0.374171	2.54712	0.0108616	0.294609	0
BaRT2v18chr1HG024300	106.858	-0.737028	0.289481	-2.54603	0.0108956	0.29464	C2 NT-type domain-containing protein;Protein PLASTID MOVEMENT IMPAIRED 1
BaRT2v18chr6HG324430	417.75	-0.53982	0.212003	-2.54628	0.0108878	0.29464	E3 ubiquitin-protein ligase WAV3;Anaphase-promoting complex subunit 11;Cdk-activating kinase assembly factor;Putative chromatin regulator PHD family
BaRT2v18chr1HG023550	2874.76	0.764076	0.300213	2.54511	0.0109242	0.294971	0
BaRT2v18chr2HG082350	211.659	-0.620892	0.244092	-2.54368	0.0109691	0.295737	Farnesylated protein 2;Heavy metal-associated isoprenylated plant protein 26;HMA domain-containing protein
BaRT2v18chr1HG046710	547.54	-0.530335	0.208767	-2.54032	0.0110751	0.296819	0
BaRT2v18chr3HG124980	51.4783	-0.797422	0.313907	-2.54031	0.0110753	0.296819	Transcription factor MYB1R1;Putative malic enzyme;transcription factor MYBS3;Myb family transcription factor;HTH myb-type domain-containing protein
BaRT2v18chr3HG137580	334.021	-0.49647	0.195383	-2.54101	0.0110532	0.296819	DEAD-box ATP-dependent RNA helicase 56;Spliceosome RNA helicase BAT1 isoform 1;Putative helicase Cas3, CRISPR-associated, core
BaRT2v18chr5HG238820	106.895	0.9237	0.363613	2.54034	0.0110745	0.296819	Peroxisomal membrane protein 2 (Fragment)
BaRT2v18chr2HG072780	52.2734	0.835405	0.328995	2.53926	0.0111086	0.297267	0
BaRT2v18chr1HG008320	30.7692	0.944359	0.372151	2.53757	0.0111625	0.298265	0
BaRT2v18chr2HG072080	154.024	-0.850162	0.33528	-2.53568	0.0112229	0.299324	0
BaRT2v18chr2HG099340	11.8159	0.928853	0.36637	2.53529	0.0112355	0.299324	Pectin acetylesterase
BaRT2v18chr6HG312340	49.0455	0.762033	0.300688	2.5343	0.0112672	0.299725	26S protease regulatory subunit 6A like;AAA domain-containing protein;Putative Proteasome-activating nucleotidase;Cell division control protein 48 like E;p-loop containing nucleoside triphosphate hydrolase superfamily protein
BaRT2v18chr2HG082850	136.844	0.632392	0.249673	2.53288	0.011313	0.300496	RAB6-interacting golgin
BaRT2v18chr1HG035770	238.646	0.936387	0.369783	2.53227	0.0113328	0.300579	Putative ribosomal protein S8;30S ribosomal protein S8, chloroplastic
BaRT2v18chr3HG127480	24.0783	-0.933846	0.369137	-2.52981	0.0114125	0.30185	0
BaRT2v18chr3HG136820	76.8868	0.830228	0.328253	2.52923	0.0114312	0.30185	Calcium permeable stress-gated cation channel 1
BaRT2v18chr7HG365960	26.6144	0.946533	0.374205	2.52945	0.0114242	0.30185	0
BaRT2v18chr6HG326210	148.484	-0.626176	0.247713	-2.52783	0.011477	0.302614	DNL-type domain-containing protein;DNL-type zinc finger protein
BaRT2v18chr1HG000510	18.1333	0.874651	0.346421	2.52482	0.0115757	0.303157	23 kDa jasmonate-induced protein-like
BaRT2v18chr1HG011350	463.745	0.835426	0.330977	2.52412	0.0115989	0.303157	0
BaRT2v18chr2HG083240	39.3209	0.92761	0.367493	2.52416	0.0115976	0.303157	Putative tubulin GTPase;Cell division protein FtsZ
BaRT2v18chr2HG085800	61.5836	0.943207	0.373665	2.52421	0.011596	0.303157	Glutamate decarboxylase
BaRT2v18chr4HG195430	42.8238	0.852976	0.337792	2.52515	0.0115649	0.303157	0
BaRT2v18chr5HG274440	274.32	-0.772024	0.305655	-2.5258	0.0115434	0.303157	Indole-2-monooxygenase;Putative ferulate 5-hydroxylase;Indolin-2-one monooxygenase
BaRT2v18chr5HG223130	75.8511	0.815554	0.32322	2.52322	0.0116286	0.303269	0
BaRT2v18chr7HG355300	24.0167	0.90582	0.35903	2.52297	0.0116369	0.303269	DUF632 domain-containing protein;nitrate regulatory gene2 protein-like;BZIP transcription factor
BaRT2v18chr6HG320500	1071.9	-0.580902	0.230882	-2.51601	0.0118693	0.308876	Eukaryotic translation initiation factor 2B family protein, putative, expressed;GTP binding protein, putative
BaRT2v18chr4HG181890	19.0322	-0.928592	0.369182	-2.51527	0.0118941	0.309074	CVC domain-containing protein;Pentatricopeptide repeat-containing protein;Pentatricopeptide, putative, expressed
BaRT2v18chr2HG073420	316.976	0.692698	0.275509	2.51425	0.0119285	0.309502	0
BaRT2v18chr2HG098310	95.2522	0.854013	0.339801	2.51327	0.0119616	0.309502	Cold acclimation protein WCS19;Cold responsive protein
BaRT2v18chr4HG197450	517.811	-0.521253	0.20755	-2.51146	0.0120234	0.309502	calmodulin-7 isoform X3;calmodulin-7;Calmodulin
BaRT2v18chr5HG242810	99.7793	0.81427	0.324078	2.51258	0.0119853	0.309502	Putative enoyl-ACP-reductase protein (Fragment);Enoyl-[acyl-carrier-protein] reductase [NADH], chloroplastic;Glucose/ribitol dehydrogenase
BaRT2v18chr6HG295150	1862.59	0.717305	0.285585	2.5117	0.0120151	0.309502	Hydroxymethylbilane synthase;Porphobilinogen deaminase, chloroplastic
BaRT2v18chr7HG353680	3546	0.669241	0.2665	2.51123	0.0120312	0.309502	Glutamate-1-semialdehyde 2,1-aminomutase
BaRT2v18chr7HG360590	20.78	-0.940095	0.374346	-2.5113	0.0120288	0.309502	NAC domain-containing protein
BaRT2v18chr5HG278500	7111.69	0.607085	0.242045	2.50815	0.0121366	0.311766	30S ribosomal protein S6 alpha, chloroplastic;Structural constituent of ribosome, putative
BaRT2v18chr1HG031810	125.056	0.917622	0.365971	2.50736	0.0121637	0.312017	0
BaRT2v18chr2HG110830	6.50095	0.856082	0.341908	2.50384	0.0122855	0.313604	0
BaRT2v18chr6HG291250	914.202	0.642863	0.25672	2.50414	0.012275	0.313604	Delta-aminolevulinic acid dehydratase
BaRT2v18chr6HG309920	108.179	0.700811	0.27976	2.50504	0.0122436	0.313604	0
BaRT2v18chr7HG362100	370.642	0.931967	0.372258	2.50355	0.0122954	0.313604	0
BaRT2v18chr2HG106020	1135.12	-0.659082	0.263528	-2.50099	0.0123845	0.314981	Triacylglycerol lipase OBL1;Putative feruloyl esterase A
BaRT2v18chr3HG125950	1988.99	-0.692101	0.276697	-2.50129	0.0123741	0.314981	probable serine incorporator;Serinc-domain containing serine and sphingolipid biosynthesis protein;TMS membrane protein/tumor differentially expressed protein containing protein;Serine incorporator/TMS membrane protein
BaRT2v18chr2HG070960	60.2819	0.794591	0.318167	2.4974	0.0125108	0.315995	Mixed-linked glucan synthase 2;Cellulose synthase-like CslF8;Cellulose synthase-like protein D3
BaRT2v18chr3HG124660	213.045	0.734151	0.29378	2.49898	0.0124551	0.315995	TRAM domain-containing protein;11S globulin subunit beta-like
BaRT2v18chr4HG184320	291.002	-0.705256	0.282407	-2.4973	0.0125142	0.315995	Nucleoside diphosphate kinase
BaRT2v18chr4HG216830	2913.35	0.740337	0.296523	2.49673	0.0125344	0.315995	0
BaRT2v18chr5HG280520	97.7226	0.796073	0.318885	2.49643	0.0125451	0.315995	0
BaRT2v18chr6HG309640	115.144	0.764914	0.306412	2.49636	0.0125476	0.315995	Protein kinase domain-containing protein;Nodulation receptor kinase
BaRT2v18chr7HG371220	64.3448	-0.769452	0.308149	-2.49701	0.0125245	0.315995	Fatty acyl-CoA reductase
BaRT2v18chr1HG019670	7.88617	0.891592	0.35736	2.49494	0.0125979	0.316529	0
BaRT2v18chr5HG261750	33.3071	0.932344	0.373794	2.49427	0.0126217	0.316529	Glutelin type-A 3;11S globulin seed storage protein 2;Globulin;legumin B;Cupin type-1 domain-containing protein;RmlC-like jelly roll fold
BaRT2v18chr7HG350690	170.918	-0.726054	0.291068	-2.49445	0.0126152	0.316529	Transmembrane 9 superfamily member
BaRT2v18chr2HG068700	36.5416	0.870699	0.349382	2.49211	0.0126987	0.318016	Glucan endo-1,3-beta-D-glucosidase
BaRT2v18chr4HG210260	310.979	0.722409	0.289979	2.49124	0.0127298	0.318351	0
BaRT2v18chr2HG055610	6.67953	-0.83264	0.334588	-2.48855	0.0128264	0.320258	Acyl-(Acyl-carrier-protein) desaturase, chloroplastic;Acyl-[acyl-carrier-protein] desaturase;Acyl-[acyl-carrier-protein] 4-desaturase
BaRT2v18chr2HG077730	3810.09	-0.547704	0.220142	-2.48796	0.0128478	0.320258	Putative pyridoxine 4-dehydrogenase;Aldo-keto reductase yakc;Aldo-keto reductase/ oxidoreductase
BaRT2v18chr5HG246350	391.139	0.539361	0.216817	2.48764	0.0128595	0.320258	Protein PLASTID REDOX INSENSITIVE 2, chloroplastic
BaRT2v18chr2HG057820	8.14872	-0.924921	0.371903	-2.487	0.0128827	0.32039	0
BaRT2v18chr3HG117410	366.676	0.684573	0.275439	2.48539	0.0129411	0.321398	0
BaRT2v18chr1HG014250	488.073	-0.706323	0.284646	-2.48141	0.0130865	0.322334	probable calcium-binding protein CML18;Calcium-binding allergen Ole e 8;probable calcium-binding protein CML23;Calcium-binding protein cml24;probable calcium-binding protein CML27;Parvalbumin
BaRT2v18chr2HG092490	12.7149	0.906668	0.365068	2.48356	0.0130077	0.322334	Caffeoylshikimate esterase;Alpha/beta-Hydrolases superfamily protein
BaRT2v18chr3HG148270	37.1054	-0.833246	0.335631	-2.48262	0.0130419	0.322334	Glucan endo-1,3-beta-D-glucosidase
BaRT2v18chr5HG239060	51.9972	0.925506	0.372935	2.48168	0.0130764	0.322334	40S ribosomal protein S16;Ribosomal protein S9, putative;Putative ribosomal protein S9;Ribosomal protein S5 domain 2-type fold
BaRT2v18chr5HG245060	309.193	0.569912	0.229613	2.48205	0.0130629	0.322334	CRS1 / YhbY (CRM) domain-containing protein;CRM-domain containing factor CFM3, chloroplastic/mitochondrial;Chloroplastic group IIA intron splicing facilitator CRS1, chloroplastic;CRM-domain containing factor CFM3 chloroplastic/mitochondrial;CRM-domain containing factor CFM3A like;Putative RNA-binding, CRM domain-containing protein
BaRT2v18chr5HG258420	1368.09	-0.676153	0.272361	-2.48256	0.0130444	0.322334	0
BaRT2v18chr2HG071330	237.499	0.908288	0.366376	2.47912	0.0131709	0.323968	0
BaRT2v18chr2HG053860	54.5904	0.73242	0.29559	2.47782	0.0132186	0.324697	0
BaRT2v18chr5HG254430	669.613	0.52526	0.212037	2.47721	0.0132413	0.324811	0
BaRT2v18chr5HG224540	41.3609	0.886278	0.357924	2.47616	0.0132804	0.324998	Bidirectional sugar transporter SWEET;Sugars will eventually be exported transporter17a
BaRT2v18chr7HG369670	39444.7	-0.560437	0.226345	-2.47603	0.0132852	0.324998	Thiamine thiazole synthase, chloroplastic
BaRT2v18chr3HG158380	99.6033	0.80188	0.324137	2.47389	0.013365	0.326063	Carboxypeptidase
BaRT2v18chr4HG186700	220.212	-0.670818	0.271114	-2.4743	0.0133497	0.326063	The fantastic four family
BaRT2v18chr4HG218380	481.453	0.876689	0.35459	2.4724	0.0134208	0.326979	Stem 28 kDa glycoprotein;Acid phosphatase 1
BaRT2v18chr1HG009790	2031.49	0.668908	0.270717	2.47088	0.0134781	0.327339	0
BaRT2v18chr3HG126860	143.518	0.564699	0.228503	2.4713	0.0134623	0.327339	0
BaRT2v18chr5HG279500	73.4339	0.893237	0.361553	2.47056	0.0134903	0.327339	Nascent polypeptide-associated complex subunit beta
BaRT2v18chr4HG194610	1488.71	0.557117	0.225591	2.46959	0.013527	0.327787	Putative retroelement;Peroxidase 64;Putative nucleotidyltransferase, Ribonuclease H;Transposon Tf2-1 polyprotein (Fragment)
BaRT2v18chr7HG361570	409.449	0.677509	0.274576	2.46748	0.0136069	0.329281	0
BaRT2v18chr1HG045010	3036.87	0.66121	0.268061	2.46664	0.0136387	0.329605	0
BaRT2v18chr4HG179120	730.06	0.507207	0.20591	2.46324	0.0137686	0.332297	0
BaRT2v18chr2HG095130	17.3794	0.921974	0.374491	2.46194	0.0138188	0.33306	0
BaRT2v18chr2HG085010	161.251	0.713334	0.289831	2.46121	0.013847	0.333292	0
BaRT2v18chr2HG053700	12630	0.743771	0.302323	2.46019	0.0138865	0.333797	ruBisCO large subunit-binding protein subunit alpha;60 kDa chaperonin alpha subunit
BaRT2v18chr1HG039430	66.8766	0.749452	0.304711	2.45955	0.0139112	0.333828	Signal recognition particle 54 kDa protein
BaRT2v18chr6HG314210	18.7224	-0.9192	0.373781	-2.45919	0.013925	0.333828	tRNA-2-methylthio-N(6)-dimethylallyladenosine synthase
BaRT2v18chr5HG255180	29.5437	0.91929	0.373997	2.45801	0.0139708	0.33448	0
BaRT2v18chr1HG001070	7.40863	0.773821	0.315102	2.45578	0.0140578	0.335223	0
BaRT2v18chr5HG234850	1853.44	0.752837	0.30653	2.456	0.0140493	0.335223	3'(2'),5'-bisphosphate nucleotidase
BaRT2v18chr7HG329600	525.559	0.570865	0.232417	2.45621	0.014041	0.335223	LRR receptor-like serine/threonine-protein kinase FLS2
BaRT2v18chr4HG187100	84.1115	0.854458	0.348006	2.4553	0.0140768	0.33523	0
BaRT2v18chr4HG180140-BaRT2v18chr4HG180150	97.3346	-0.784859	0.319783	-2.45435	0.0141141	0.335509	S-adenosyl-L-methionine-dependent methyltransferase superfamily protein;tRNA (Cytosine(34)-C(5))-methyltransferase
BaRT2v18chr5HG221430	8.20208	0.883406	0.360049	2.45357	0.0141446	0.335509	0
BaRT2v18chr6HG306820	225.17	0.740384	0.301743	2.45369	0.0141398	0.335509	CLIP-associated protein
BaRT2v18chr3HG142800	195.358	-0.674134	0.274942	-2.45192	0.0142098	0.33661	Phosphoglycerate mutase;Histidine phosphatase
BaRT2v18chr4HG206130	154.876	-0.669366	0.27358	-2.44669	0.0144173	0.338401	Hcy-binding domain-containing protein;Homocysteine S-methyltransferase 1;Homocysteine-binding domain containing protein
BaRT2v18chr4HG208760	5187.49	-0.601944	0.245748	-2.44944	0.014308	0.338401	Inositol-3-phosphate synthase
BaRT2v18chr5HG256320	332.724	0.580195	0.237122	2.44682	0.0144124	0.338401	probable UDP-arabinose 4-epimerase 1;Putative UDP-arabinose 4-epimerase 2
BaRT2v18chr5HG266310	33.2482	-0.8738	0.357033	-2.44739	0.0143895	0.338401	WRKY domain-containing protein
BaRT2v18chr5HG274610	11.3696	0.907771	0.370832	2.44793	0.0143679	0.338401	0
BaRT2v18chr6HG300840	11.9392	-0.916074	0.374372	-2.44696	0.0144067	0.338401	Thromboxane-A synthase
BaRT2v18chr7HG376660	746.164	0.625452	0.255425	2.44867	0.0143384	0.338401	0
BaRT2v18chr1HG010930	862.164	0.915484	0.374632	2.44369	0.0145378	0.339455	0
BaRT2v18chr2HG070490	117.597	0.750327	0.306871	2.44509	0.0144816	0.339455	Sugar carrier protein C;MFS domain-containing protein
BaRT2v18chr2HG108510	1688.28	0.608494	0.248957	2.44418	0.0145183	0.339455	0
BaRT2v18chr3HG137350	63.6218	0.714376	0.292297	2.44401	0.0145252	0.339455	Condensin complex subunit 2
BaRT2v18chr5HG259480	453.442	-0.665219	0.272303	-2.44294	0.0145682	0.339723	PLCXc domain-containing protein;Phosphatidylinositol diacylglycerol-lyase;PI-PLC X-box domain-containing protein;1-phosphatidylinositol phosphodiesterase;PLC-like phosphodiesterases superfamily protein
BaRT2v18chr5HG273000	16.1323	0.912998	0.374001	2.44117	0.0146399	0.340509	adenylate isopentenyltransferase 5, chloroplastic-like;Isopentenyl transferase IPT4;IPPT domain-containing protein
BaRT2v18chr6HG319180	113.814	-0.663207	0.271642	-2.44147	0.0146275	0.340509	Cyclic nucleotide-binding domain-containing protein
BaRT2v18chr1HG037180	58.0512	-0.828579	0.33949	-2.44066	0.0146604	0.340522	D-fructose-1,6-bisphosphate 1-phosphohydrolase
BaRT2v18chr6HG306020	83.7626	-0.638088	0.261488	-2.44022	0.0146783	0.340522	0
BaRT2v18chr1HG005910	67.9732	0.803376	0.329327	2.43945	0.0147098	0.340812	Ribosome biogenesis regulatory protein
BaRT2v18chr5HG251110	163.513	0.717237	0.294259	2.43744	0.0147918	0.34227	0
BaRT2v18chr2HG092160	710.176	-0.839548	0.34502	-2.43333	0.0149605	0.345729	Phenylalanine ammonia-lyase
BaRT2v18chr5HG270320	435.985	0.895651	0.368237	2.43227	0.0150046	0.346302	40S ribosomal protein S18;Putative ribosomal protein S13
BaRT2v18chr1HG023590	616.501	-0.590582	0.243056	-2.42982	0.0151065	0.348206	Xyloglucan endotransglucosylase/hydrolase
BaRT2v18chr3HG117290	12.5481	0.904663	0.372613	2.42789	0.0151871	0.349167	Bowman-Birk type trypsin inhibitor
BaRT2v18chr6HG291550	53.9116	0.876472	0.360941	2.4283	0.0151699	0.349167	0
BaRT2v18chr4HG208420	5515.83	0.461632	0.190251	2.42644	0.0152479	0.350117	30S ribosomal protein S10, chloroplastic;Putative feruloyl esterase;Putative alpha/beta-Hydrolases superfamily protein
BaRT2v18chr4HG215440	46.7977	0.821505	0.338684	2.42558	0.0152839	0.350496	Cytochrome c-type biogenesis protein
BaRT2v18chr1HG033980	207.641	-0.655498	0.270383	-2.42433	0.0153366	0.351256	GTP binding protein
BaRT2v18chr4HG216050	762.102	-0.714695	0.295229	-2.42081	0.0154858	0.353769	0
BaRT2v18chr7HG385020	22.6138	0.895701	0.369979	2.42095	0.0154801	0.353769	BURP domain-containing protein
BaRT2v18chr4HG200390	24.9336	0.881958	0.364478	2.41978	0.0155297	0.354323	0
BaRT2v18chr5HG251440	62.8533	0.89378	0.369436	2.41931	0.01555	0.354335	0
BaRT2v18chr4HG218560	18.9915	0.900923	0.372645	2.41764	0.0156215	0.355513	pentatricopeptide repeat-containing protein At1g03100, mitochondrial
BaRT2v18chr4HG196390	20.4159	0.897357	0.371355	2.41644	0.0156732	0.356238	Transcription factor RF2b;Basic leucine-zipper 52;BZIP domain-containing protein
BaRT2v18chr4HG178590	1171.2	-0.549881	0.227609	-2.4159	0.0156963	0.356313	zinc finger protein CONSTANS-LIKE 16-like;NADH2 dehydrogenase family protein;C2C2-CO-like transcription factor;CONSTANS-like protein-like protein
BaRT2v18chr1HG020500	42.6028	-0.754701	0.312582	-2.41441	0.0157608	0.356765	0
BaRT2v18chr3HG173710	23.3214	-0.874721	0.362471	-2.41322	0.0158124	0.356765	0
BaRT2v18chr4HG205030	203.108	-0.534403	0.221497	-2.41269	0.0158355	0.356765	0
BaRT2v18chr6HG292830	373.922	0.556715	0.230673	2.41344	0.0158028	0.356765	Diaminopimelate decarboxylase
BaRT2v18chr7HG339090	22.7598	-0.889919	0.368821	-2.41288	0.0158271	0.356765	0
BaRT2v18chr7HG365420	8.54481	0.83769	0.3469	2.41478	0.0157445	0.356765	0
BaRT2v18chr2HG058810	36.3285	0.808802	0.33569	2.40937	0.01598	0.35733	0
BaRT2v18chr3HG135320	305.252	0.693471	0.287697	2.41042	0.0159341	0.35733	ATP citrate synthase;ATP-citrate synthase beta chain protein 1
BaRT2v18chr3HG171240	26.47	-0.866995	0.359792	-2.40971	0.0159652	0.35733	Histidine decarboxylase;Pyridoxal phosphate-dependent decarboxylase
BaRT2v18chr4HG177200	60.2518	0.856266	0.355327	2.4098	0.0159614	0.35733	Protein UPSTREAM OF FLC;Auxin-regulated protein
BaRT2v18chr4HG217100	277.597	-0.536394	0.222546	-2.41026	0.0159411	0.35733	ALA-interacting subunit
BaRT2v18chr6HG298700-BaRT2v18chr6HG298710	8.98825	-0.879135	0.364772	-2.4101	0.0159482	0.35733	Sodium-coupled neutral amino acid transporter 1
BaRT2v18chr1HG003860	8.58249	0.86078	0.357554	2.40741	0.0160661	0.358809	0
BaRT2v18chr4HG199820	208.784	0.781722	0.324776	2.40696	0.0160861	0.35881	0
BaRT2v18chr1HG019940	326.115	-0.716568	0.298075	-2.40398	0.0162175	0.359066	Alpha-galactosidase
BaRT2v18chr1HG043010	702.969	0.542611	0.22555	2.40572	0.0161406	0.359066	0
BaRT2v18chr2HG086660	77.7294	0.757484	0.315058	2.40427	0.016205	0.359066	0
BaRT2v18chr2HG089530	585.906	-0.611945	0.254549	-2.40403	0.0162153	0.359066	0
BaRT2v18chr5HG276860	498.781	-0.496159	0.20621	-2.40609	0.0161242	0.359066	galactokinase-like;galactokinase-like isoform X1;Galactokinase;Galactokinase, putative
BaRT2v18chr7HG347500	73.9142	-0.698655	0.290572	-2.40441	0.0161984	0.359066	0
BaRT2v18chr5HG251820	26.8654	-0.85986	0.357871	-2.40271	0.0162741	0.359431	Carboxypeptidase;Serine carboxypeptidase-like 40
BaRT2v18chr7HG386200	818.716	0.559989	0.233032	2.40306	0.0162587	0.359431	Protease 2;Prolyl oligopeptidase family protein
BaRT2v18chr5HG271380	53.0003	0.894309	0.372356	2.40175	0.0163167	0.359813	0
BaRT2v18chr7HG367230	333.053	0.625008	0.260266	2.40142	0.0163314	0.359813	0
BaRT2v18chr2HG054230	45.8459	0.888269	0.371023	2.39411	0.0166608	0.361382	L-ascorbate peroxidase
BaRT2v18chr2HG055020	173.313	0.759685	0.316938	2.39695	0.0165321	0.361382	0
BaRT2v18chr2HG069200	18.9915	0.879059	0.36655	2.39819	0.0164761	0.361382	0
BaRT2v18chr3HG127120-BaRT2v18chr3HG127130	129.768	0.667782	0.278442	2.39829	0.016472	0.361382	ABC transporter C family member 3;Multidrug resistance associated protein MRP2
BaRT2v18chr3HG141950	420.061	0.811045	0.338778	2.39403	0.0166643	0.361382	sodium/pyruvate cotransporter BASS2, chloroplastic;Sodium Bile acid symporter family
BaRT2v18chr4HG180140	190.961	0.670908	0.280195	2.39443	0.0166461	0.361382	0
BaRT2v18chr4HG186690	1440.69	0.495406	0.206807	2.39549	0.016598	0.361382	0
BaRT2v18chr4HG189580	825.777	-0.486746	0.203046	-2.39722	0.0165201	0.361382	0
BaRT2v18chr5HG249890	40.0547	0.893864	0.373228	2.39496	0.0166224	0.361382	0
BaRT2v18chr6HG312120-BaRT2v18chr6HG312130	18.7817	-0.887454	0.370287	-2.39666	0.016545	0.361382	F-box domain containing protein;FBD domain-containing protein (Fragment)
BaRT2v18chr7HG333630	1574.12	-0.666894	0.278178	-2.39737	0.0165133	0.361382	0
BaRT2v18chr7HG353720	13.0648	-0.887554	0.370494	-2.39559	0.0165935	0.361382	0
BaRT2v18chr7HG377850	37.3337	-0.827896	0.345799	-2.39416	0.0166586	0.361382	Chaperone protein ClpB1-like;ATP-dependent Clp protease ATP-binding subunit clpC
BaRT2v18chr3HG170750	64.5139	0.865144	0.361496	2.39323	0.0167007	0.361552	DIMBOA UDP-glucosyltransferase BX9;Cytokinin-N-glucosyltransferase 1;UDP-glycosyltransferase 76E11;UDP-glycosyltransferase 76E2;UDP-glycosyltransferase 76C1
BaRT2v18chr7HG364680	6.87253	0.76903	0.32137	2.39297	0.0167124	0.361552	Prephenate/arogenate dehydrogenase domain-containing protein
BaRT2v18chr1HG048440	119.885	0.756717	0.316383	2.39178	0.016767	0.362297	Ribonuclease 1
BaRT2v18chr6HG298100	38.9453	-0.829493	0.346923	-2.391	0.0168024	0.362625	0
BaRT2v18chr7HG371740	6.52659	0.84478	0.353499	2.38977	0.016859	0.36341	Glycosyltransferase family 92 protein
BaRT2v18chr4HG189800	10.6347	-0.895048	0.374677	-2.38885	0.0169011	0.363826	Transcription factor MYB21;Transcription factor MYB108;MYB transcription factor
BaRT2v18chr5HG271270	52.7838	0.872748	0.365401	2.38847	0.0169189	0.363826	rRNA N-glycosidase;Protein synthesis inhibitor II
BaRT2v18chr3HG164840	9.05836	0.736041	0.308284	2.38754	0.0169615	0.364308	Potassium transporter
BaRT2v18chr1HG043140	171.467	0.827856	0.34692	2.3863	0.0170188	0.364814	0
BaRT2v18chr1HG049230	1578.54	-0.650531	0.272728	-2.38527	0.0170664	0.364814	UDP-glucose 4-epimerase 1;UDP-glucose 4-epimerase
BaRT2v18chr3HG170860	419.831	0.888673	0.372506	2.38566	0.0170486	0.364814	40S ribosomal protein S10
BaRT2v18chr4HG199690	18.9054	-0.893782	0.374589	-2.38603	0.0170312	0.364814	0
BaRT2v18chr5HG271250	1560.84	-0.812567	0.340744	-2.38468	0.0170938	0.364966	0
BaRT2v18chr7HG378820	11.9732	0.841006	0.352752	2.38413	0.0171195	0.365081	0
BaRT2v18chr2HG106510	160.857	0.672831	0.282322	2.38321	0.0171625	0.365564	Protein FATTY ACID EXPORT 2, chloroplastic;Putative glycine-rich RNA-binding protein 7
BaRT2v18chr3HG164380	41.6947	-0.807099	0.338803	-2.38221	0.0172091	0.366123	0
BaRT2v18chr2HG065610	78.2137	-0.890776	0.374078	-2.38126	0.0172536	0.366634	0
BaRT2v18chr7HG342110	1643.71	-0.476483	0.200134	-2.38082	0.0172742	0.366637	Sucrose synthase
BaRT2v18chr7HG385110	73.6595	-0.723418	0.304454	-2.37612	0.0174959	0.370904	0
BaRT2v18chr3HG121550	41.4355	-0.809551	0.340868	-2.37497	0.0175503	0.371619	0
BaRT2v18chr1HG038500	604.549	-0.783456	0.329998	-2.37412	0.0175906	0.372034	Non-symbiotic hemoglobin 1;GLOBIN domain-containing protein
BaRT2v18chr6HG284530	204.583	0.853242	0.359563	2.373	0.0176443	0.372595	0
BaRT2v18chr6HG289520	49.6054	0.855955	0.360751	2.3727	0.0176586	0.372595	Root phototropism protein 3;Transposon protein Mutator sub-class;NPH3 domain-containing protein
BaRT2v18chr1HG017080	62.4477	-0.690398	0.291142	-2.37134	0.0177235	0.373087	0
BaRT2v18chr2HG100920	13.2605	-0.888445	0.374612	-2.37164	0.0177092	0.373087	Wall-associated receptor kinase 2
BaRT2v18chr4HG218320	1624.75	0.803799	0.33911	2.37032	0.0177727	0.373684	Apyrase;Nucleoside-triphosphatase
BaRT2v18chr7HG340840	115.383	0.845459	0.356802	2.36954	0.01781	0.374032	0
BaRT2v18chr7HG373400	193.53	0.680968	0.287509	2.36851	0.01786	0.374643	0
BaRT2v18chr1HG044930	80.214	0.673051	0.28425	2.36781	0.0178937	0.374911	dnaJ homolog subfamily B member 1;HSP40/DnaJ peptide-binding protein;J domain-containing protein;Terminal organelle assembly protein
BaRT2v18chr1HG037060	363.508	0.56629	0.239276	2.36668	0.0179484	0.375619	0
BaRT2v18chr5HG277140	12.3441	0.882931	0.373224	2.36569	0.0179967	0.376191	0
BaRT2v18chr1HG037950	1472.42	-0.568106	0.240278	-2.36437	0.0180607	0.376653	Profilin
BaRT2v18chr6HG318320	23.3081	0.864489	0.36562	2.36445	0.0180569	0.376653	Heat shock 22 kDa protein, mitochondrial;SHSP domain-containing protein
BaRT2v18chr2HG069300	35.405	0.82965	0.350992	2.36373	0.018092	0.376868	0
BaRT2v18chr2HG052370	9251.43	-0.46998	0.198903	-2.36286	0.0181344	0.376877	CP12 domain-containing protein;Calvin cycle protein CP12-2, chloroplastic
BaRT2v18chr3HG157120	63.3245	0.883823	0.374021	2.36303	0.0181261	0.376877	fructokinase-like 1, chloroplastic;PfkB domain-containing protein;Fructokinase-2;Fructokinase-like protein 1;Putative fructokinase-4
BaRT2v18chr2HG074760	113.549	0.604724	0.256022	2.362	0.0181766	0.377317	Alpha/beta-Hydrolases superfamily protein
BaRT2v18chr1HG033120	37.7499	-0.766995	0.324921	-2.36056	0.0182474	0.377996	BZIP domain-containing protein;Basic leucine zipper 23;Transcription factor TGA3
BaRT2v18chr5HG257360	1491.96	0.530182	0.224608	2.36048	0.0182514	0.377996	0
BaRT2v18chr2HG082540	126.522	0.802486	0.340186	2.35896	0.018326	0.378584	0
BaRT2v18chr3HG153030	8718.39	0.634932	0.269219	2.35842	0.0183528	0.378584	50S ribosomal protein L34, chloroplastic
BaRT2v18chr4HG196800	99.1224	0.638817	0.270768	2.35928	0.0183104	0.378584	0
BaRT2v18chr6HG324280	124.931	-0.601717	0.25516	-2.35819	0.0183641	0.378584	GATA transcription factor;GATA-type domain-containing protein
BaRT2v18chr5HG234220	10.2865	0.865485	0.367128	2.35745	0.018401	0.378908	NPH3 domain-containing protein
BaRT2v18chr3HG118860	17.6735	0.829494	0.352059	2.35612	0.0184669	0.37983	GH10 domain-containing protein;Putative (1,4)-beta-xylan endohydrolase;Putative Pol polyprotein from transposon element Bs1
BaRT2v18chr7HG343550	67.8867	0.688952	0.292514	2.35528	0.018509	0.38026	Acylaminoacyl-peptidase1;Acylamino-acid-releasing enzyme, putative;Dipeptidyl peptidase family member 6
BaRT2v18chr4HG216870	764.196	0.687978	0.292179	2.35465	0.0185401	0.380465	0
BaRT2v18chr5HG245840	156.134	-0.520947	0.221334	-2.35367	0.0185889	0.381029	0
BaRT2v18chr1HG017500	153.926	0.796242	0.338449	2.35262	0.0186415	0.381041	0
BaRT2v18chr2HG082230	344.402	0.547374	0.23273	2.35197	0.0186743	0.381041	Protein AUXIN SIGNALING F-BOX 3;Transport inhibitor response 1-like protein
BaRT2v18chr3HG145940	9.93264	-0.87439	0.37176	-2.35203	0.0186713	0.381041	Sinapine esterase (Fragment);GDSL-like Lipase/Acylhydrolase family protein, expressed;GDSL esterase/lipase
BaRT2v18chr6HG307330	258.414	0.847418	0.360216	2.35253	0.0186464	0.381041	60S ribosomal protein L14-1;Ribosomal protein L14
BaRT2v18chr1HG015110	54.5432	0.706902	0.30089	2.34937	0.0188054	0.381565	Procollagen-proline 4-dioxygenase
BaRT2v18chr3HG165980	184.333	-0.548607	0.233365	-2.35085	0.0187306	0.381565	0
BaRT2v18chr4HG200430	67.3818	0.782612	0.333119	2.34935	0.0188063	0.381565	KH domain-containing protein At2g38610
BaRT2v18chr5HG235630	607.553	0.869553	0.369991	2.3502	0.0187634	0.381565	0
BaRT2v18chr5HG274860	354.737	0.767583	0.32671	2.34944	0.0188019	0.381565	0
BaRT2v18chr1HG045670	188.522	0.72475	0.308904	2.3462	0.018966	0.384154	Eukaryotic translation initiation factor 3 subunit D
BaRT2v18chr2HG070950	6.34687	0.850529	0.362611	2.34557	0.018998	0.384154	Cellulose synthase-like CslF8;Putative mixed-linked glucan synthase 8;Cellulose synthase-like CslF9;Cellulose synthase-like protein D3
BaRT2v18chr7HG386540	31.3069	0.861812	0.367419	2.34558	0.0189974	0.384154	0
BaRT2v18chr1HG018170	1646.99	0.784069	0.334438	2.34444	0.0190558	0.384888	0
BaRT2v18chr1HG013040	59.8963	-0.750793	0.320549	-2.34221	0.0191699	0.385838	3'-N-debenzoyl-2'-deoxytaxol N-benzoyltransferase;Acyl transferase 7;10-deacetylbaccatin III 10-O-acetyltransferase;HXXXD-type acyl-transferase family protein
BaRT2v18chr4HG213020	243.38	-0.575662	0.245771	-2.34227	0.0191668	0.385838	0
BaRT2v18chr4HG216200	1382.13	-0.463567	0.197944	-2.34191	0.0191853	0.385838	Methyltransferase;Cycloartenol-C-24-methyltransferase 1
BaRT2v18chr7HG368070	72.2636	0.730276	0.311838	2.34184	0.0191887	0.385838	0
BaRT2v18chr2HG073710	44.5371	0.76514	0.32682	2.34117	0.0192234	0.386102	Filament-like plant protein 3
BaRT2v18chr1HG018340	187.051	-0.529476	0.226292	-2.33979	0.0192944	0.386139	UGGT;Putative UDP-glucose glycoprotein glucosyltransferase
BaRT2v18chr2HG106850	733.462	0.748552	0.320161	2.33805	0.0193847	0.386139	probable isoaspartyl peptidase/L-asparaginase 2;L-asparaginase family protein
BaRT2v18chr3HG138840	41.4092	-0.751493	0.321274	-2.3391	0.0193301	0.386139	0
BaRT2v18chr4HG197620	47.5395	-0.765375	0.327243	-2.33885	0.0193429	0.386139	0
BaRT2v18chr5HG234680	83.5711	-0.659965	0.28223	-2.33839	0.0193669	0.386139	0
BaRT2v18chr5HG247310	223.047	-0.522647	0.223496	-2.33851	0.0193608	0.386139	0
BaRT2v18chr6HG284220	63.8502	0.866899	0.370817	2.33781	0.0193973	0.386139	0
BaRT2v18chr7HG355280	7.5615	-0.855192	0.365806	-2.33783	0.019396	0.386139	0
BaRT2v18chr7HG387220	197.964	0.529971	0.226848	2.33624	0.0194789	0.387334	Ent-copalyl diphosphate synthase;Terpene synthase TPS35
BaRT2v18chr2HG053880	85.3987	-0.705305	0.301993	-2.3355	0.0195172	0.387384	0
BaRT2v18chr4HG214170	17.7434	0.869493	0.372316	2.33536	0.0195245	0.387384	RING-H2 finger protein ATL16
BaRT2v18chr6HG325320	582.219	0.872929	0.37392	2.33453	0.0195678	0.387814	60S ribosomal protein L23;Large subunit ribosomal protein L23e
BaRT2v18chr4HG180110	2884.54	-0.408879	0.175265	-2.33291	0.0196527	0.387927	0
BaRT2v18chr4HG210020	10.9437	0.801404	0.343497	2.33307	0.0196444	0.387927	Pectinesterase
BaRT2v18chr5HG252130	171.063	-0.556437	0.238446	-2.3336	0.0196169	0.387927	Purine permease 3
BaRT2v18chrUnG390700	1266.8	-0.721659	0.309356	-2.33278	0.0196599	0.387927	0
BaRT2v18chr6HG298700	818.818	-0.539058	0.231266	-2.33091	0.0197584	0.388963	Sodium-coupled neutral amino acid transporter 1
BaRT2v18chr6HG312580	111.629	-0.678814	0.29122	-2.33093	0.0197572	0.388963	Myb family transcription factor APL;HTH myb-type domain-containing protein;Calcium-dependent protein kinase substrate protein
BaRT2v18chr7HG381830	21.4162	-0.86251	0.37009	-2.33054	0.0197774	0.388963	0
BaRT2v18chr2HG049560	12.5695	0.870309	0.373667	2.3291	0.0198537	0.389609	0
BaRT2v18chr5HG251510	133.469	0.721428	0.309705	2.3294	0.0198378	0.389609	Tuliposide A-converting enzyme b1, amyloplastic;Gibberellin receptor GID1L2;Putative carboxylesterase 12;2-hydroxyisoflavanone dehydratase
BaRT2v18chr6HG322270	140.33	-0.671832	0.288602	-2.32789	0.0199182	0.390449	Putative steroid-binding protein 3;Membrane-associated progesterone binding protein 2;Cytochrome b5 heme-binding domain-containing protein;Membrane steroid-binding protein 1
BaRT2v18chr5HG271500	9.25765	0.863597	0.371144	2.32685	0.0199732	0.3911	OTU domain-containing protein
BaRT2v18chr2HG097870	485.851	0.473011	0.203334	2.32628	0.0200038	0.39122	UDP-N-acetylglucosamine diphosphorylase 2;UDPGP domain-containing protein
BaRT2v18chr6HG325810	425.955	-0.475285	0.204343	-2.32592	0.0200229	0.39122	Acetyl-coenzyme A synthetase;Acetate--CoA ligase
BaRT2v18chr1HG008740	99.4129	0.798699	0.343458	2.32546	0.0200472	0.391268	Transcription factor MYB86;MYB18 transcription factor;Transcription factor MYB61;Myb transcription factor;HTH myb-type domain-containing protein
BaRT2v18chr3HG114990	264.971	-0.538841	0.231797	-2.32462	0.0200921	0.39172	0
BaRT2v18chr1HG001350	8.46324	0.852722	0.366945	2.32384	0.020134	0.392111	0
BaRT2v18chr3HG164000	120.546	0.729237	0.31393	2.32293	0.0201831	0.392642	0
BaRT2v18chr1HG025860	963.392	0.75773	0.326332	2.32196	0.0202353	0.39323	0
BaRT2v18chr4HG211800	992.397	0.530713	0.228616	2.32142	0.0202644	0.39337	0
BaRT2v18chr6HG324200	20.1308	0.863513	0.372593	2.31758	0.0204722	0.396975	BHLH domain-containing protein;Transcription factor SPATULA
BaRT2v18chr4HG202370	4374.8	0.599145	0.25863	2.31661	0.0205248	0.397565	50S ribosomal protein uL;50S ribosomal protein L4, chloroplastic;Peroxisomal nicotinamide adenine dinucleotide carrier
BaRT2v18chr1HG008100	158.292	-0.764343	0.330071	-2.31569	0.0205752	0.398112	0
BaRT2v18chr1HG011150	15.2429	-0.804471	0.347689	-2.31377	0.0206805	0.399635	0
BaRT2v18chr7HG383790	60.0719	0.754785	0.326261	2.31344	0.0206984	0.399635	S5 DRBM domain-containing protein;Ribosomal S subunit
BaRT2v18chr7HG364110	1244.78	0.617709	0.267083	2.31279	0.020734	0.399893	0
BaRT2v18chr1HG001300	3069.46	-0.444645	0.192399	-2.31106	0.0208295	0.400247	Methionine S-methyltransferase
BaRT2v18chr1HG010110	26.6296	0.860591	0.372368	2.31113	0.0208255	0.400247	0
BaRT2v18chr1HG030850	77.6948	0.83863	0.362849	2.31124	0.0208199	0.400247	Glycine-rich protein 2b;Cold shock protein 1;Putative RNA-binding protein containing PIN domain and invovled in translation or RNA processing;CSD domain-containing protein;Glycine-rich protein 2;glycine-rich protein 2-like
BaRT2v18chr2HG076180	2400.74	0.530006	0.229476	2.30963	0.0209084	0.400247	Polynucleotide phosphorylase 1;Probable polyribonucleotide nucleotidyltransferase 1, chloroplastic
BaRT2v18chr2HG092820	76.2705	0.85286	0.369245	2.30974	0.0209027	0.400247	0
BaRT2v18chr5HG241840	491996	-0.420223	0.181937	-2.30971	0.0209041	0.400247	Ribulose bisphosphate carboxylase small chain
BaRT2v18chr6HG323610	362.129	0.640121	0.277042	2.31055	0.0208575	0.400247	0
BaRT2v18chr3HG147390	118.596	0.793745	0.343745	2.30911	0.0209375	0.400377	Hexosyltransferase
BaRT2v18chr6HG281850	2169.97	-0.651616	0.282274	-2.30846	0.0209738	0.400644	0
BaRT2v18chr1HG039330	70.8808	0.662885	0.287666	2.30436	0.0212025	0.403651	Outer envelope protein 80, chloroplastic;Omp85 domain-containing protein
BaRT2v18chr1HG046980	10.4412	0.863699	0.374683	2.30515	0.0211583	0.403651	Delta(14)-sterol reductase;delta(14)-sterol reductase-like
BaRT2v18chr3HG138480	711.004	-0.477754	0.207401	-2.30353	0.0212489	0.403651	Farnesylated protein 2;Heavy metal-associated isoprenylated plant protein 26;HMA domain-containing protein;Heavy metal transport/detoxification superfamily protein
BaRT2v18chr4HG215460	154292	-0.451932	0.196251	-2.30283	0.0212886	0.403651	Glyceraldehyde-3-phosphate dehydrogenase
BaRT2v18chr5HG237800	1881.12	0.417858	0.181403	2.30348	0.0212517	0.403651	0
BaRT2v18chr5HG247860	302.862	-0.737784	0.320167	-2.30437	0.0212018	0.403651	0
BaRT2v18chr6HG317310	4373.85	-0.428687	0.18615	-2.30291	0.0212839	0.403651	Photosynthetic NDH subcomplex B 4
BaRT2v18chr5HG248790	325.724	-0.600895	0.261066	-2.3017	0.0213521	0.404146	0
BaRT2v18chr7HG367900	62.0327	0.79057	0.343492	2.30157	0.0213597	0.404146	0
BaRT2v18chr1HG029570	821.68	-0.53501	0.232711	-2.29903	0.0215034	0.404917	0
BaRT2v18chr1HG046110	116.742	-0.80742	0.351122	-2.29954	0.021474	0.404917	0
BaRT2v18chr5HG272900	289.802	0.851145	0.370017	2.30029	0.021432	0.404917	S5 DRBM domain-containing protein;40S ribosomal protein S2-4
BaRT2v18chr5HG279170	6.75915	-0.805066	0.350203	-2.29885	0.0215132	0.404917	Glycosyltransferase;Nucleotide-diphospho-sugar transferase family protein
BaRT2v18chr6HG302290	84.8659	0.854224	0.371506	2.29935	0.0214849	0.404917	40S ribosomal protein S24
BaRT2v18chr5HG252780	868.455	-0.697234	0.303395	-2.2981	0.0215558	0.405295	Cellulose synthase-like protein E6
BaRT2v18chr6HG316720	237.26	-0.706398	0.307464	-2.2975	0.0215904	0.405521	Phosphoglycerate mutase (2,3-diphosphoglycerate-dependent)
BaRT2v18chr3HG152830	10.6506	0.799217	0.348045	2.2963	0.0216586	0.405569	Putative O-Glycosyl hydrolase superfamily protein;Putative glucan endo-1,3-beta-glucosidase GVI;Glycoside hydrolase, family 17
BaRT2v18chr5HG222440	731.814	-0.585473	0.254968	-2.29626	0.0216607	0.405569	Alpha-humulene/(-)-(E)-beta-caryophyllene synthase
BaRT2v18chr7HG328920	40.8511	0.785588	0.342092	2.29642	0.0216517	0.405569	0
BaRT2v18chr7HG365290	92.6513	0.615076	0.267962	2.29539	0.0217109	0.406084	0
BaRT2v18chr2HG060370	468.082	-0.700963	0.305597	-2.29375	0.0218049	0.407418	NAB domain-containing protein;Kinase interacting family protein
BaRT2v18chr1HG029600	7.09245	-0.792586	0.345852	-2.29169	0.0219237	0.408423	0
BaRT2v18chr2HG096140	122.136	0.593425	0.258998	2.29124	0.0219497	0.408423	Thioredoxin domain-containing protein;Thioredoxin-like protein 3-3-like protein
BaRT2v18chr4HG189600	85.1572	-0.616547	0.269011	-2.2919	0.0219115	0.408423	0
BaRT2v18chr5HG254270	22.5288	0.815222	0.355747	2.29158	0.0219301	0.408423	Epimerase domain-containing protein;Bifunctional dihydroflavonol 4-reductase/flavanone 4-reductase
BaRT2v18chr1HG028510	1354.88	0.473786	0.206989	2.28894	0.0220826	0.408568	0
BaRT2v18chr1HG036800	573.711	0.709977	0.310079	2.28966	0.0220408	0.408568	60S acidic ribosomal protein P2B
BaRT2v18chr2HG094090	13.2117	0.852202	0.372335	2.28881	0.0220905	0.408568	Aldehyde dehydrogenase
BaRT2v18chr6HG320260	161.776	0.695979	0.30401	2.28933	0.0220603	0.408568	Allene-oxide cyclase
BaRT2v18chr6HG324110	75.8077	-0.824641	0.360302	-2.28875	0.022094	0.408568	Skp1 domain-containing protein;DUF295 domain-containing protein
BaRT2v18chr7HG379660	14.1318	0.856867	0.374072	2.29065	0.0219837	0.408568	Putative glutathione S-transferase GSTU6;Glutathione-S-transferase Cla47
BaRT2v18chr6HG311740	58.4199	0.678485	0.296572	2.28776	0.0221516	0.409112	UPF0160 protein MYG1, mitochondrial;Metal-dependent protein hydrolase
BaRT2v18chr7HG360880	106.461	-0.595928	0.26052	-2.28746	0.022169	0.409112	0
BaRT2v18chr3HG172970	46.115	0.856265	0.37456	2.28605	0.0222511	0.409786	0
BaRT2v18chr7HG360870	730.92	0.682012	0.298313	2.28623	0.022241	0.409786	multiple organellar RNA editing factor 9, chloroplastic-like;DAG protein, chloroplastic
BaRT2v18chr7HG382750	47.9164	-0.716666	0.31394	-2.28281	0.0224415	0.412869	0
BaRT2v18chr3HG122690	244.024	0.686971	0.301023	2.28212	0.0224821	0.412987	RAP domain-containing protein
BaRT2v18chr7HG361940	7.02183	0.842503	0.369208	2.28192	0.022494	0.412987	0
BaRT2v18chr3HG147510	352.338	0.63744	0.279485	2.28076	0.0225624	0.413821	0
BaRT2v18chr3HG163760	5563.62	-0.611082	0.268086	-2.27942	0.0226421	0.414183	Metacaspase-1;ICE-like protease p20 domain containing protein, expressed;Putative metacaspase, having alternative splicing products
BaRT2v18chr3HG173500	13160.2	-0.481586	0.211268	-2.2795	0.0226373	0.414183	Nodulin-26
BaRT2v18chr6HG291150	278.293	0.493473	0.216505	2.27926	0.0226513	0.414183	0
BaRT2v18chr3HG129160	15.938	0.845973	0.3714	2.27779	0.0227389	0.414938	SPOROCYTELESS-like EAR-containing protein 2
BaRT2v18chr6HG311560	65.5617	-0.724224	0.317939	-2.27787	0.0227341	0.414938	0
BaRT2v18chr1HG017210	418.121	0.496053	0.217863	2.2769	0.022792	0.415042	0
BaRT2v18chr3HG116190	339.621	-0.776012	0.340874	-2.27654	0.0228139	0.415042	0
BaRT2v18chr6HG286130	1804.57	-0.403012	0.176971	-2.27728	0.0227693	0.415042	Peroxidase
BaRT2v18chr2HG064850	64.5113	0.742629	0.326278	2.27606	0.0228422	0.415137	0
BaRT2v18chr7HG355190	482.435	-0.450108	0.197852	-2.27498	0.0229072	0.415897	0
BaRT2v18chr1HG021540	261.473	0.508723	0.223805	2.27307	0.0230222	0.417486	Kinesin-like protein KIN-7D mitochondrial;Kinesin-like protein KIN-7K, chloroplastic;Kinesin-related protein 11;Kinesin motor domain-containing protein
BaRT2v18chr6HG322840	133.933	0.815223	0.358695	2.27275	0.0230413	0.417486	0
BaRT2v18chr5HG273940	30.7103	0.849794	0.374059	2.27182	0.0230975	0.417662	TRASH domain-containing protein;60S ribosomal protein L24
BaRT2v18chr6HG287510	74.9729	-0.649569	0.285914	-2.2719	0.0230924	0.417662	Arginine/serine-rich splicing factor;Ribosomal RNA small subunit methyltransferase chloroplastic;Serine/arginine-rich splicing factor RS40;Arginine/serine-rich splicing factor RSP41
BaRT2v18chr2HG077080	2115.55	0.540595	0.238084	2.27061	0.0231708	0.418111	0
BaRT2v18chr3HG173410	686.946	-0.505716	0.222795	-2.26987	0.0232155	0.418111	Inorganic diphosphatase
BaRT2v18chr5HG271220	171.376	0.817262	0.360008	2.27012	0.0232003	0.418111	0
BaRT2v18chr7HG372610	25.1513	0.837113	0.368774	2.26999	0.0232084	0.418111	0
BaRT2v18chr2HG103970	309.942	0.530887	0.233956	2.26918	0.0232577	0.418451	Kinesin-1;Kinesin motor domain-containing protein
BaRT2v18chr4HG198800	291.235	0.641587	0.282794	2.26874	0.0232839	0.418504	Hexosyltransferase
BaRT2v18chr1HG020100	33.7008	0.76636	0.338117	2.26655	0.0234175	0.41881	0
BaRT2v18chr2HG057320	58.503	0.758423	0.33452	2.2672	0.023378	0.41881	0
BaRT2v18chr2HG084830	206.83	0.631515	0.278446	2.268	0.0233294	0.41881	0
BaRT2v18chr5HG245340	1598.43	-0.547629	0.24152	-2.26742	0.0233643	0.41881	0
BaRT2v18chr7HG350760	1463.97	-0.542264	0.23922	-2.2668	0.0234023	0.41881	0
BaRT2v18chr3HG167390	47.9245	-0.740802	0.326929	-2.26594	0.0234549	0.419061	0
BaRT2v18chr4HG216130	261.753	0.776957	0.343043	2.2649	0.0235189	0.419565	60S ribosomal protein L23;Large subunit ribosomal protein L23e
BaRT2v18chr7HG347170	40.7609	-0.786929	0.347473	-2.26472	0.0235298	0.419565	0
BaRT2v18chr4HG216610	30.6877	-0.768551	0.339448	-2.26412	0.0235666	0.419803	Putative membrane-associated kinase regulator 6
BaRT2v18chr1HG011780	125.606	0.634623	0.280403	2.26325	0.0236201	0.420339	GDSL esterase/lipase;Alpha-L-fucosidase 2
BaRT2v18chr2HG061100	493.198	-0.777095	0.343506	-2.26224	0.0236823	0.421029	0
BaRT2v18chr3HG149940	27.1542	0.783795	0.346722	2.26059	0.0237849	0.422435	Dynein light chain
BaRT2v18chr1HG023840	34.485	0.727524	0.322035	2.25915	0.0238743	0.423154	DNA (Cytosine-5)-methyltransferase CMT2-like;50S ribosomal protein L35
BaRT2v18chr2HG092580	16.4361	0.822098	0.363954	2.2588	0.0238961	0.423154	0
BaRT2v18chr6HG307440	374.341	-0.646331	0.286057	-2.25945	0.0238554	0.423154	Calcium-dependent protein kinase, isoform AK1;Protein kinase domain-containing protein
BaRT2v18chr2HG086740	40.8741	0.82628	0.366122	2.25684	0.0240179	0.424011	60S ribosomal protein L34
BaRT2v18chr3HG152680	17.7371	0.845336	0.374721	2.25591	0.0240763	0.424011	Methyladenine glycosylase;Putative GMP synthase [glutamine-hydrolyzing]
BaRT2v18chr5HG244920	1258.46	0.536219	0.2376	2.25682	0.0240196	0.424011	Isochorismate synthase
BaRT2v18chr6HG309020	408.096	-0.624353	0.276595	-2.25729	0.0239902	0.424011	Iron-phytosiderophore transporter yellow stripe 1;Iron-phytosiderophore transporter YSL15;Metal-nicotianamine transporter YSL2
BaRT2v18chr6HG325660	387.22	-0.694381	0.307827	-2.25575	0.0240862	0.424011	Putative carboxylesterase 15;Putative gibberellin receptor GID1L3
BaRT2v18chr7HG368360	163.496	0.711286	0.315219	2.25648	0.0240403	0.424011	PALP domain-containing protein;Pyridoxal-5'-phosphate-dependent enzyme family protein
BaRT2v18chr7HG360800	103.237	0.705371	0.313284	2.25154	0.0243512	0.428257	0
BaRT2v18chr2HG079830	47.3713	-0.6635	0.294752	-2.25105	0.0243827	0.42839	Uridine-cytidine kinase C isoform F;CYTH domain-containing protein
BaRT2v18chr2HG056650	43.603	0.784966	0.348812	2.2504	0.0244236	0.428656	0
BaRT2v18chr5HG242130	37.1684	0.75766	0.336898	2.24893	0.0245172	0.428656	0
BaRT2v18chr6HG299490	513.971	0.651448	0.289596	2.24951	0.0244801	0.428656	ADP,ATP carrier protein
BaRT2v18chr6HG319090	588.774	-0.517841	0.230247	-2.24907	0.0245081	0.428656	0
BaRT2v18chr7HG359890	543.777	-0.602794	0.267985	-2.24936	0.0244898	0.428656	putative glycerol-3-phosphate transporter 1;MFS domain-containing protein;Phosphate starvation-induced protein 3 isoform 1
BaRT2v18chr4HG178690	34.7815	-0.735059	0.326977	-2.24804	0.0245733	0.429221	cell division cycle-associated protein 7-like;Zinc-finger domain of monoamine-oxidase A repressor R1
BaRT2v18chr7HG370920	6524.7	-0.549541	0.244585	-2.24683	0.0246508	0.430155	0
BaRT2v18chr2HG064120	1502.04	0.54452	0.242513	2.24532	0.0247475	0.430983	0
BaRT2v18chr5HG225860	15.2128	0.82234	0.366304	2.24497	0.0247702	0.430983	0
BaRT2v18chr5HG230370	1128.48	0.405637	0.180649	2.24544	0.0247397	0.430983	Smr domain-containing protein;Genomes uncoupled 1;Pentatricopeptide repeat-containing protein
BaRT2v18chr7HG330130	124.402	0.655785	0.292334	2.24327	0.0248793	0.432462	0
BaRT2v18chr7HG362030	263.991	0.824595	0.368063	2.24037	0.0250671	0.435305	0
BaRT2v18chr3HG137320	51.8661	0.752654	0.33634	2.23778	0.0252356	0.437807	0
BaRT2v18chr2HG109800	17.9643	0.833057	0.372479	2.23652	0.0253175	0.43838	1,3-beta-glucan synthase
BaRT2v18chr3HG134530	172.911	-0.645851	0.288757	-2.23666	0.0253087	0.43838	0
BaRT2v18chr7HG329330	52.2608	0.774996	0.346636	2.23576	0.0253675	0.438823	50S ribosomal protein L9, chloroplastic
BaRT2v18chr1HG021820	391.964	-0.490759	0.219639	-2.23439	0.0254573	0.439607	PMEI domain-containing protein
BaRT2v18chr2HG095840	29.572	0.771918	0.345481	2.23432	0.0254618	0.439607	Syntaxin-binding protein 5
BaRT2v18chr1HG022070	123.729	-0.670295	0.300133	-2.23333	0.0255272	0.440314	0
BaRT2v18chr2HG091790	27.8636	-0.801548	0.358965	-2.23294	0.0255527	0.44033	Disease resistance protein RPS2;AAA domain-containing protein;NB-ARC domain-containing protein
BaRT2v18chr2HG056150	50.2946	-0.66831	0.299349	-2.23254	0.0255793	0.440366	0
BaRT2v18chr4HG189290	2069.86	-0.502041	0.225069	-2.23061	0.0257067	0.441015	0
BaRT2v18chr4HG220740	4732.39	0.486998	0.218294	2.23093	0.0256858	0.441015	4a-hydroxytetrahydrobiopterin dehydratase
BaRT2v18chr5HG228520	756.772	-0.515603	0.231162	-2.23049	0.0257152	0.441015	Aspartic proteinase nepenthesin-1;Peptidase A1 domain-containing protein;Putative nucleoid DNA-binding protein cnd41
BaRT2v18chr5HG239670	101.863	0.629632	0.28223	2.23092	0.0256868	0.441015	Non-specific serine/threonine protein kinase
BaRT2v18chr2HG062090	990.006	-0.52064	0.233613	-2.22864	0.025838	0.441855	0
BaRT2v18chr6HG291070	8618.16	0.568955	0.255268	2.22885	0.0258237	0.441855	50S ribosomal protein L3, chloroplastic
BaRT2v18chr6HG312600	853.335	-0.554807	0.248886	-2.22916	0.0258031	0.441855	Ubiquinol oxidase
BaRT2v18chr2HG089590	404.528	-0.436818	0.196058	-2.228	0.0258804	0.442158	Serinc-domain containing serine and sphingolipid biosynthesis protein;Serine incorporator 3;TMS membrane protein/tumor differentially expressed protein
BaRT2v18chr7HG355180	1708.72	-0.501911	0.225329	-2.22746	0.0259163	0.442351	Beta-galactosidase 12;Beta-galactosidase
BaRT2v18chr2HG092900	373.918	0.636248	0.285814	2.22609	0.026008	0.443494	0
BaRT2v18chr2HG089440	166.358	-0.705676	0.317145	-2.22509	0.0260754	0.444223	PTI1-like tyrosine-protein kinase 3 isoform X3;Pto-interacting protein 1;Serine/threonine-protein kinase PBS1;Protein kinase domain-containing protein
BaRT2v18chr2HG107780	214.024	0.611266	0.274949	2.22319	0.0262028	0.445546	3-oxoacyl-[acyl-carrier-protein] synthase III, chloroplastic;3-oxoacyl-synthase III, mRNA;3-oxoacyl-synthase III
BaRT2v18chr7HG350230	142.307	-0.573481	0.257928	-2.22342	0.0261876	0.445546	0
BaRT2v18chr5HG238150	168.024	-0.581668	0.261761	-2.22214	0.026274	0.446334	0
BaRT2v18chr2HG109880	1379.67	-0.528779	0.238184	-2.22004	0.0264159	0.448112	0
BaRT2v18chr3HG120440	316.39	0.677713	0.305403	2.21908	0.0264814	0.448112	Indole-2-monooxygenase-like;Indolin-2-one monooxygenase
BaRT2v18chr4HG176070	10.3067	0.831693	0.374721	2.2195	0.0264525	0.448112	LRRcap domain-containing protein;Acidic leucine-rich nuclear phosphoprotein 32-related protein 2
BaRT2v18chr6HG327980	169.756	-0.508703	0.229234	-2.21915	0.0264767	0.448112	0
BaRT2v18chr7HG357080	19.8545	0.817211	0.368319	2.21876	0.0265034	0.448112	0
BaRT2v18chr3HG157790	41.8531	0.830636	0.374703	2.21678	0.0266379	0.449544	0
BaRT2v18chr4HG193430	392.286	0.633626	0.285832	2.21678	0.0266381	0.449544	Eukaryotic translation initiation factor 3 subunit I
BaRT2v18chr1HG021930	13.4657	0.780246	0.352098	2.21599	0.0266919	0.450028	Cys/Met metabolism PLP-dependent enzyme family protein, expressed;Methionine gamma-lyase
BaRT2v18chr3HG115350	11.3367	0.818706	0.369823	2.21378	0.0268441	0.45048	lysine-rich arabinogalactan protein 18-like
BaRT2v18chr3HG137060	135.781	0.659056	0.297583	2.2147	0.0267806	0.45048	0
BaRT2v18chr5HG243310	490.868	-0.471962	0.213173	-2.21399	0.0268295	0.45048	0
BaRT2v18chr6HG289950	37050.3	0.62348	0.281477	2.21503	0.0267579	0.45048	Chlorophyll a-b binding protein, chloroplastic
BaRT2v18chr7HG367200	22.8104	0.787477	0.35563	2.21431	0.0268072	0.45048	Cytokinin riboside 5'-monophosphate phosphoribohydrolase
BaRT2v18chr1HG035900	121.137	0.761664	0.344177	2.213	0.0268975	0.450534	0
BaRT2v18chr3HG151420	396.84	0.600348	0.271252	2.21325	0.0268807	0.450534	0
BaRT2v18chr6HG311710	98.718	-0.559135	0.252831	-2.21149	0.0270016	0.451435	Calcium-dependent protein kinase 5;Calcium dependent protein kinase5;Calcium dependent protein kinase7;Calcium dependent protein kinase
BaRT2v18chr7HG354640	489.17	-0.49857	0.225435	-2.21159	0.0269948	0.451435	0
BaRT2v18chr1HG042760	8.71615	0.815604	0.369625	2.20657	0.027344	0.452524	0
BaRT2v18chr2HG056850	42.7414	0.732925	0.332055	2.20724	0.0272976	0.452524	Leucine-rich repeat receptor-like protein kinase PEPR1;Leucine-rich repeat receptor-like protein kinase PEPR2;Protein kinase domain-containing protein
BaRT2v18chr3HG144720	16.3963	-0.807452	0.365691	-2.20802	0.0272431	0.452524	Formin-like protein 18
BaRT2v18chr3HG149850	14.7263	0.827701	0.374625	2.20941	0.027146	0.452524	0
BaRT2v18chr3HG150870	134.083	0.706661	0.319822	2.20954	0.027137	0.452524	protein PLASTID TRANSCRIPTIONALLY ACTIVE 12, chloroplastic
BaRT2v18chr4HG220370	192.857	0.70684	0.320322	2.20666	0.0273381	0.452524	DEAD-box ATP-dependent RNA helicase 50
BaRT2v18chr5HG255720	712.744	0.506447	0.229514	2.20661	0.0273416	0.452524	Amino acid binding protein, putative;ACT domain-containing protein ACR4
BaRT2v18chr5HG276200	5044.64	0.627329	0.284149	2.20775	0.0272617	0.452524	50S ribosomal protein L18
BaRT2v18chr6HG287850	51.174	0.760947	0.344802	2.20691	0.0273206	0.452524	Rhodanese/Cell cycle control phosphatase superfamily protein isoform 2;Rhodanese-like domain-containing protein 7;Rhodanese domain-containing protein
BaRT2v18chr6HG319600	528.934	-0.394299	0.178507	-2.20887	0.0271837	0.452524	Chaperone protein dnaJ-related;Chlorophyll a-b binding protein 7;Drought-induced protein 1;Heat shock protein DnaJ
BaRT2v18chr6HG323740	264.645	0.728086	0.32951	2.2096	0.0271328	0.452524	Putative cinnamyl alcohol dehydrogenase 5;Cinnamyl-alcohol dehydrogenase
BaRT2v18chr6HG310930	222.782	0.775208	0.35161	2.20474	0.0274725	0.454098	Transcription factor bHLH157;BHLH domain-containing protein;Transcription factor LHW;Putative basic helix-loop-helix protein
BaRT2v18chr7HG367980	726.852	0.663568	0.301007	2.20449	0.0274897	0.454098	Elongation factor 1-gamma 2
BaRT2v18chr2HG096610	272.286	0.47435	0.215228	2.20394	0.0275282	0.454317	BEACH domain-containing protein C2
BaRT2v18chr5HG246210	448.448	0.592035	0.268702	2.20331	0.027573	0.454637	Protein CHAPERONE-LIKE PROTEIN OF POR1, chloroplastic
BaRT2v18chr1HG035030	20.5622	-0.796957	0.361772	-2.20292	0.0276001	0.454667	0
BaRT2v18chr2HG098160	156.384	-0.630101	0.286299	-2.20085	0.0277465	0.454992	Hydroxycinnamoyl-Coenzyme A shikimate/quinate hydroxycinnamoyltransferase (Fragment);Shikimate O-hydroxycinnamoyltransferase;Chloramphenicol acetyltransferase-like domain-containing protein
BaRT2v18chr3HG125920	1797.61	0.622996	0.283036	2.20112	0.0277275	0.454992	MAR-binding filament-like protein 1;MAR-binding filament-like protein 1-1
BaRT2v18chr5HG281060	14.46	-0.818952	0.37205	-2.20119	0.0277228	0.454992	Protein DETOXIFICATION
BaRT2v18chr7HG353900	42.2161	0.813705	0.36972	2.20087	0.0277452	0.454992	0
BaRT2v18chr7HG373330	85.1012	0.821528	0.373251	2.20101	0.0277356	0.454992	Flavonoid 3'-hydroxylase;Red aleurone1
BaRT2v18chr3HG150560	359.327	-0.545308	0.248004	-2.19879	0.027893	0.455976	DNA mismatch repair protein PMS1-like;Pentatricopeptide repeat-containing protein
BaRT2v18chr5HG255150	27.6701	0.812739	0.369726	2.19822	0.0279335	0.455976	Type II inositol polyphosphate 5-phosphatase 15;IPPc domain-containing protein
BaRT2v18chr5HG256760	52.9323	-0.734086	0.333779	-2.19932	0.0278552	0.455976	Fes1 domain-containing protein
BaRT2v18chr5HG266700	438.133	0.557583	0.253573	2.19891	0.0278843	0.455976	Aspartate-semialdehyde dehydrogenase
BaRT2v18chr6HG325300	8.24693	0.820193	0.373097	2.19834	0.0279252	0.455976	0
BaRT2v18chr3HG127060	171.086	0.547702	0.249301	2.19695	0.028024	0.456412	0
BaRT2v18chr5HG259400	4321.38	-0.374879	0.170615	-2.19722	0.0280048	0.456412	Drought-inducible cysteine proteinase (Fragment)
BaRT2v18chr7HG384480	433.48	0.807918	0.367775	2.19678	0.0280365	0.456412	60S ribosomal protein L27
BaRT2v18chr1HG046020	19.4967	0.801547	0.365074	2.19558	0.0281223	0.456981	0
BaRT2v18chr7HG367870	561.033	0.70136	0.319428	2.19568	0.028115	0.456981	Beta-galactosidase 4;Beta-galactosidase
BaRT2v18chr1HG017970	141.515	0.693376	0.315903	2.1949	0.0281707	0.457353	mRNA cap-binding protein;Eukaryotic translation initiation factor isoform 4E-2
BaRT2v18chr1HG034160	181.14	0.60561	0.275978	2.19441	0.0282056	0.457507	0
BaRT2v18chr4HG206170	4995.55	0.602316	0.274657	2.19297	0.0283092	0.457946	0
BaRT2v18chr4HG219650	24.6518	0.821835	0.374702	2.1933	0.0282856	0.457946	Salt tolerance receptor-like cytoplasmic kinase 1;Receptor protein kinase CRINKLY4;Leucine-rich repeat receptor protein kinase EXS;Protein kinase domain-containing protein
BaRT2v18chr6HG288870	83.0717	-0.741432	0.338043	-2.19331	0.0282854	0.457946	Aquaporin;Plasma membrane intrinsic protein
BaRT2v18chr1HG036340	830.837	-0.423765	0.193463	-2.19042	0.0284937	0.458042	0
BaRT2v18chr1HG043310	476.646	-0.560793	0.255834	-2.19202	0.0283781	0.458042	NADPH-dependent aldehyde reductase-like protein, chloroplastic;Short-chain type dehydrogenase/reductase
BaRT2v18chr2HG080450	728.053	-0.622837	0.284201	-2.19154	0.028413	0.458042	Glycosyltransferase;UDP-glycosyltransferase 85A2
BaRT2v18chr3HG135100	152.524	0.641322	0.292772	2.19051	0.028487	0.458042	0
BaRT2v18chr4HG199840	726.554	0.584499	0.266705	2.19155	0.0284117	0.458042	0
BaRT2v18chr5HG254740	42.3191	-0.78548	0.358438	-2.1914	0.0284229	0.458042	Putative mitochondrial adenine nucleotide transporter BTL1;Protein brittle-1, chloroplastic/amyloplastic;Mitochondrial deoxynucleotide carrier
BaRT2v18chr6HG325090	7.61629	0.777575	0.354917	2.19086	0.0284618	0.458042	0
BaRT2v18chr5HG254730-BaRT2v18chr5HG254740	21.0404	-0.820508	0.374715	-2.18968	0.0285472	0.458492	Putative mitochondrial adenine nucleotide transporter BTL1;Protein brittle-1, chloroplastic/amyloplastic
BaRT2v18chr4HG214280	2233.96	0.615411	0.281222	2.18834	0.0286447	0.459646	GATA zinc finger domain-containing protein 10;Di-heme cytochrome, transmembrane
BaRT2v18chr1HG048550	8.72711	0.774017	0.353893	2.18715	0.0287316	0.460629	AAA domain-containing protein;Mitochondrial chaperone;Putative AAA-type ATPase
BaRT2v18chr7HG382200	141.518	-0.575237	0.26305	-2.1868	0.0287573	0.46063	Putative calcium-binding protein CML8;Caltractin;probable calcium-binding protein CML20;probable calcium-binding protein CML13 isoform X2
BaRT2v18chr1HG009050	9.94629	0.812181	0.371948	2.18359	0.0289926	0.460789	0
BaRT2v18chr4HG187070	1613.67	0.696449	0.318865	2.18415	0.0289512	0.460789	0
BaRT2v18chr4HG199130	395.84	0.812081	0.371819	2.18408	0.0289567	0.460789	40S ribosomal protein S7
BaRT2v18chr5HG233040	28.0122	0.815501	0.37312	2.18562	0.0288431	0.460789	SWIB domain-containing protein;Brg-1 associated factor;Upstream activation factor subunit spp27;SWIB/MDM2 domain
BaRT2v18chr5HG247110	362.495	0.537688	0.246278	2.18326	0.029017	0.460789	0
BaRT2v18chr5HG252380	70.2763	-0.686596	0.314337	-2.18426	0.0289428	0.460789	tRNA (Cytosine(34)-C(5))-methyltransferase;S-adenosyl-L-methionine-dependent methyltransferase superfamily protein;tRNA (Cytosine-5-)-methyltransferase NSUN2;Bacterial Fmu (Sun)/eukaryotic nucleolar NOL1/Nop2p
BaRT2v18chr6HG300490	154.931	-0.564283	0.258425	-2.18355	0.0289954	0.460789	0
BaRT2v18chr6HG309190	107.593	-0.660042	0.302045	-2.18524	0.0288711	0.460789	Glycine-rich cell wall structural protein 2;acanthoscurrin-1;Transposon protein, putative, CACTA, En/Spm sub-class, expressed
BaRT2v18chr6HG328430	25.3598	-0.812478	0.371775	-2.1854	0.0288592	0.460789	0
BaRT2v18chr7HG349150	1488.05	-0.704458	0.322678	-2.18316	0.0290239	0.460789	Carboxyl-terminal-processing peptidase 3, chloroplastic;C-terminal processing peptidase, chloroplastic;PDZ domain-containing protein;Peptidase S41 family protein isoform 1
BaRT2v18chr2HG072700	162.488	0.740572	0.3394	2.182	0.0291095	0.461741	60S ribosomal protein L44;Ribosomal protein L44e
BaRT2v18chr4HG201630	1781.05	-0.49084	0.225036	-2.18116	0.0291713	0.462312	Catalytic/ hydrolase;suppressor of disruption of TFIIS-like
BaRT2v18chr6HG289990	36422	0.546741	0.250722	2.18066	0.0292082	0.462489	Chlorophyll a-b binding protein, chloroplastic
BaRT2v18chr2HG095940	42.2455	0.736268	0.337865	2.17918	0.0293183	0.462503	O-fucosyltransferase family protein
BaRT2v18chr3HG121170	83.8684	0.594096	0.272564	2.17966	0.029283	0.462503	1,4-dihydroxy-2-naphthoyl-CoA thioesterase 1;4HBT domain-containing protein;Phenylacetic acid degradation-related domain containing protein
BaRT2v18chr4HG201810	128.991	0.733475	0.336551	2.17939	0.0293028	0.462503	Chloroplast envelope protein translocase, IAP;Omp85 domain-containing protein;Translocon at the outer envelope membrane of chloroplasts 75-III
BaRT2v18chr4HG216570	11588.2	0.556927	0.255598	2.17892	0.0293379	0.462503	50S ribosomal protein L5, chloroplastic
BaRT2v18chr5HG235990	1535.64	0.506476	0.232402	2.17931	0.0293087	0.462503	0
BaRT2v18chr2HG059020	723.81	-0.657379	0.301961	-2.17703	0.0294782	0.463812	Peroxidase
BaRT2v18chr2HG077150	286.276	-0.452423	0.207823	-2.17696	0.0294833	0.463812	0
BaRT2v18chr7HG348920	8.49204	0.743831	0.341769	2.17641	0.0295243	0.463812	0
BaRT2v18chr7HG351340	348.881	0.420538	0.193213	2.17655	0.0295138	0.463812	0
BaRT2v18chr7HG362450	104.489	-0.608633	0.279805	-2.1752	0.0296149	0.464829	EMBRYO DEFECTIVE 140;Squamous cell carcinoma antigen recognized by T-cells 3;RRM domain-containing protein;RNA-binding protein SART3 (RRM superfamily)
BaRT2v18chr4HG175940	238.402	-0.518127	0.238356	-2.17376	0.0297233	0.465311	Taste receptor type 1 member 2 like
BaRT2v18chr5HG267680	133.502	0.678876	0.312302	2.17378	0.0297218	0.465311	0
BaRT2v18chr6HG320860	1922.2	0.678134	0.311928	2.17401	0.0297044	0.465311	20 kDa chaperonin, chloroplastic;Chaperonin, chloroplastic;Chaperonin
BaRT2v18chr5HG230120	991.368	-0.525769	0.241995	-2.17265	0.029807	0.466214	Myb-related protein MYBAS2;Transcription factor MYB48;Myb-related protein MYBAS1;HTH myb-type domain-containing protein;MYB transcription factor
BaRT2v18chr4HG204070	262.277	0.560477	0.258132	2.17128	0.0299101	0.46742	4-hydroxy-tetrahydrodipicolinate reductase 2, chloroplastic-like;Dihydrodipicolinate reductase
BaRT2v18chr6HG315840	407.79	0.484112	0.223085	2.17008	0.030001	0.468434	0
BaRT2v18chr3HG150290	231.858	-0.577742	0.266387	-2.16881	0.0300973	0.469528	TCP domain-containing protein;transcription factor TCP13;Transcription factor TCP5
BaRT2v18chr5HG239940	27.5806	0.793544	0.366325	2.16623	0.0302939	0.472185	PPM-type phosphatase domain-containing protein
BaRT2v18chr5HG240520	15.8095	-0.80324	0.370912	-2.16558	0.0303433	0.472545	0
BaRT2v18chr4HG207520	43.1947	0.739305	0.341476	2.16503	0.0303853	0.47277	Protein SNOWY COTYLEDON 3;QWRF motif-containing protein 2
BaRT2v18chr7HG331970	174.631	-0.581973	0.268847	-2.1647	0.0304104	0.47277	SNAP25 homologous protein SNAP33;SNAPous protein SNAP33;t-SNARE coiled-coil homology domain-containing protein;Synaptosomal associated protein, putative;Target SNARE coiled-coil domain
BaRT2v18chr1HG012600	1268.45	-0.499404	0.231215	-2.15991	0.0307797	0.473415	Phosphoenolpyruvate/phosphate translocator 2, chloroplastic;TPT domain-containing protein;triose phosphate/phosphate translocator, non-green plastid, chloroplastic-like;Plastid phosphate/phosphoenolpyruvate translocator2;Plastid phosphate/phosphoenolpyruvate translocator1;EamA domain-containing protein/TPT domain-containing protein (Fragment)
BaRT2v18chr2HG059940	116.857	0.732305	0.339309	2.15822	0.0309105	0.473415	Putative GTP-binding protein OBGC1, chloroplastic;GTP-binding protein OBGC chloroplastic
BaRT2v18chr2HG081840	25.2173	0.782544	0.361653	2.1638	0.03048	0.473415	0
BaRT2v18chr2HG082610	84.3658	-0.55227	0.25541	-2.16229	0.0305961	0.473415	DRMBL domain-containing protein;DNA cross-link repair protein SNM1
BaRT2v18chr2HG088610	612.699	-0.46432	0.214837	-2.16127	0.0306746	0.473415	0
BaRT2v18chr3HG116640	51.0871	-0.720224	0.333329	-2.1607	0.0307185	0.473415	Cysteine-rich RLK 29, putative isoform 1;Receptor-like protein kinase, putative,expressed;putative cysteine-rich receptor-like protein kinase 35 isoform X1
BaRT2v18chr3HG129000	384.639	-0.492316	0.227629	-2.1628	0.0305566	0.473415	0
BaRT2v18chr3HG130790	269.675	0.659724	0.305756	2.15768	0.0309528	0.473415	Eukaryotic translation initiation factor 3 subunit L
BaRT2v18chr3HG169240	53.0278	-0.751552	0.348223	-2.15825	0.0309084	0.473415	Protein LATERAL ROOT PRIMORDIUM 1;SRS transcription factor (Fragment)
BaRT2v18chr4HG178650	20.9637	-0.76777	0.355632	-2.15889	0.0308589	0.473415	H15 domain-containing protein;HMG-Y-related protein A
BaRT2v18chr5HG221670	30.6517	0.806606	0.372942	2.16282	0.0305549	0.473415	Utp12 domain-containing protein;WD repeat-containing protein 43
BaRT2v18chr5HG234470	282.46	0.484153	0.223927	2.1621	0.0306104	0.473415	Adenylate kinase
BaRT2v18chr5HG237830	54.6326	0.775298	0.359185	2.15849	0.0308895	0.473415	0
BaRT2v18chr5HG251520	222.329	-0.624518	0.289163	-2.15974	0.0307926	0.473415	Putative serine/threonine-protein kinase NAK
BaRT2v18chr5HG259230	103.476	-0.569092	0.263652	-2.15849	0.0308894	0.473415	ER lumen protein retaining receptor
BaRT2v18chr6HG286880	79.8293	-0.639715	0.29593	-2.16171	0.0306407	0.473415	0
BaRT2v18chr6HG287780	116.29	0.583679	0.270096	2.161	0.0306951	0.473415	0
BaRT2v18chr6HG324620	24.5482	-0.774801	0.358308	-2.16239	0.0305883	0.473415	0
BaRT2v18chr7HG372180	204.692	0.493511	0.228712	2.15778	0.0309446	0.473415	0
BaRT2v18chr2HG074930	230.676	0.781473	0.362442	2.15613	0.0310735	0.474122	Ribosomal protein L15
BaRT2v18chr2HG083720	59.9906	0.645358	0.299245	2.15662	0.0310353	0.474122	VAMP protein SEC22;Harpin-induced family protein
BaRT2v18chr4HG183410	57.7795	0.705117	0.327038	2.15607	0.0310783	0.474122	Leucine-rich repeat receptor-like serine/threonine-protein kinase BAM1;Leucine-rich repeat receptor-like serine/threonine-protein kinase BAM2;leucine-rich repeat receptor-like serine/threonine-protein kinase BAM3;Phosphorylase kinase, gamma catalytic subunit;Protein kinase domain-containing protein
BaRT2v18chr3HG172800	252.93	0.625311	0.290126	2.15531	0.0311377	0.474222	Catalytic/ hydrolase
BaRT2v18chr4HG213980	154.036	0.540278	0.250636	2.15562	0.031113	0.474222	Glycinamide ribonucleotide synthetase
BaRT2v18chr5HG242490	398.877	0.801486	0.372135	2.15375	0.0312597	0.475677	0
BaRT2v18chr3HG133090	109.328	0.661054	0.307037	2.15301	0.031318	0.47616	0
BaRT2v18chr2HG103130	65.985	0.732333	0.340303	2.152	0.0313971	0.476729	0
BaRT2v18chr4HG174990	419.824	0.540473	0.251166	2.15186	0.0314085	0.476729	0
BaRT2v18chr3HG159940	23.1598	0.799517	0.371629	2.15138	0.0314459	0.476894	Orphans transcription factor (Fragment)
BaRT2v18chr4HG192940	9518.07	0.546777	0.254236	2.15067	0.0315025	0.47735	S5 DRBM domain-containing protein;30S ribosomal protein S5, chloroplastic
BaRT2v18chr3HG121890	8.90427	0.776067	0.360988	2.14984	0.0315676	0.477529	Transposon protein Pong sub-class;Putative harbinger transposase-derived protein;Ribosomal protein-like
BaRT2v18chr6HG321190	43.7634	-0.798753	0.37151	-2.15002	0.0315536	0.477529	Lysine ketoglutarate reductase;Lysine-ketoglutarate reductase/saccharopine dehydrogenase1;Alpha-aminoadipic semialdehyde synthase isoform X1
BaRT2v18chr1HG013450	137.418	-0.676556	0.314831	-2.14895	0.0316382	0.478195	Actin binding protein family
BaRT2v18chr2HG063710	218.458	0.478993	0.223146	2.14655	0.0318292	0.479871	Pectin acetylesterase
BaRT2v18chr4HG175640	482.337	-0.479296	0.223259	-2.14682	0.0318077	0.479871	VOC domain-containing protein;Glyoxalase family protein, expressed
BaRT2v18chr4HG218880	107.937	0.72008	0.335401	2.14692	0.0317997	0.479871	Oxysterol-binding protein-related protein 2A;PH domain-containing protein;Oxysterol-binding protein, expressed;oxysterol-binding protein-related protein 2A-like isoform X1;Oxysterol-binding protein-related protein 6
BaRT2v18chr5HG243570	160.392	-0.499031	0.232563	-2.14579	0.03189	0.480384	Putative NAD(P)H dehydrogenase subunit CRR3 chloroplastic;Chlororespiratory reduction 3 (Fragment)
BaRT2v18chr5HG265030	3281.49	-0.373929	0.174289	-2.14545	0.031917	0.480387	0
BaRT2v18chr3HG116970	2675.9	-0.450897	0.210231	-2.14477	0.031971	0.480394	0
BaRT2v18chr7HG372490	39.9245	0.724567	0.337781	2.14508	0.0319463	0.480394	0
BaRT2v18chr2HG110070	1783.89	-0.704894	0.328869	-2.14339	0.0320819	0.481255	0
BaRT2v18chr6HG299210	58.2849	0.649393	0.302953	2.14354	0.0320695	0.481255	0
BaRT2v18chr7HG380590	211.639	-0.518982	0.242177	-2.14299	0.032114	0.481335	0
BaRT2v18chr3HG139120	21.3087	0.788854	0.368169	2.14264	0.0321422	0.481355	Hyphal wall protein;Phosphoribosylformylglycinamidine synthase 2
BaRT2v18chr7HG367310	76.8715	-0.76678	0.358024	-2.1417	0.0322176	0.482082	0
BaRT2v18chr1HG004410	597.758	-0.613501	0.286561	-2.14091	0.0322814	0.482307	0
BaRT2v18chr6HG284070	62.9564	0.65881	0.307733	2.14085	0.0322863	0.482307	Trihelix transcription factor GT-2;Myb-like domain-containing protein
BaRT2v18chr7HG343350	221.317	-0.454148	0.21225	-2.13969	0.0323801	0.483306	Protein TIC 22, chloroplastic
BaRT2v18chr2HG077620	41.3396	0.681144	0.318771	2.13678	0.0326155	0.486166	Protein kinase domain-containing protein
BaRT2v18chr5HG222450	431.38	-0.606217	0.283722	-2.13666	0.0326259	0.486166	0
BaRT2v18chr3HG120990	827.191	-0.494757	0.231606	-2.1362	0.0326629	0.486314	E3 ubiquitin-protein ligase
BaRT2v18chr6HG318050	250.11	-0.510181	0.238935	-2.13523	0.0327425	0.487095	Usp domain-containing protein;Adenine nucleotide alpha hydrolases-like superfamily protein isoform 1;Rossmann-like alpha/beta/alpha sandwich fold
BaRT2v18chr6HG317250	1356.48	0.507076	0.237592	2.13423	0.0328239	0.487902	Starch synthase, chloroplastic/amyloplastic;ZSSIIb
BaRT2v18chr1HG019370	7.37978	0.708416	0.332122	2.133	0.0329245	0.488475	0
BaRT2v18chr2HG104300	1179.58	-0.550984	0.258278	-2.1333	0.0329004	0.488475	0
BaRT2v18chr5HG274000	501.289	-0.442723	0.207582	-2.13276	0.032944	0.488475	0
BaRT2v18chr6HG289480	118.894	-0.716373	0.336175	-2.13095	0.0330932	0.490282	0
BaRT2v18chr6HG320130	31949.7	-0.52027	0.244198	-2.13053	0.0331281	0.490395	Ferredoxin--nitrite reductase, chloroplastic;Nitrite reductase
BaRT2v18chr1HG029540	20.2057	0.797097	0.374256	2.12982	0.0331868	0.490454	membrane protein PM19L;Plasma membrane associated protein;GDP-mannose transporter
BaRT2v18chr7HG384460	48.2864	0.794582	0.373033	2.13006	0.0331668	0.490454	0
BaRT2v18chr5HG276000	3602.99	-0.394491	0.18528	-2.12916	0.0332412	0.490854	0
BaRT2v18chr2HG058180	969.901	-0.658131	0.309182	-2.12862	0.0332857	0.491107	0
BaRT2v18chr1HG034570	9.38383	0.789675	0.37136	2.12644	0.0334665	0.49256	alanine--glyoxylate aminotransferase 2 homolog 3, mitochondrial-like
BaRT2v18chr3HG121420	17.8811	-0.790006	0.371495	-2.12656	0.0334567	0.49256	Gamma-glutamyltranspeptidase 3;glutathione hydrolase 3;gamma-glutamyltranspeptidase 3 isoform X1;Putative gamma-glutamyl transpeptidase;Gamma-glutamyltranspeptidase 3-like protein;Gamma glutamyl transpeptidases;Putative aminoacyltransferase, Omega peptidase;Gamma-glutamyltranspeptidase 1;Gamma-glutamyl transferase
BaRT2v18chr3HG146020	230.489	0.784942	0.369103	2.12662	0.0334517	0.49256	60S ribosomal protein L28-1;Ribosomal protein L28e
BaRT2v18chr2HG061120	35.0002	-0.792298	0.372741	-2.1256	0.0335365	0.493187	0
BaRT2v18chr2HG109050	14.3266	0.7913	0.37242	2.12475	0.0336076	0.493275	Cytochrome P450 family protein, expressed
BaRT2v18chr4HG193020	6.85541	0.755079	0.355408	2.12454	0.0336249	0.493275	0
BaRT2v18chr7HG335120	37.3981	-0.731525	0.344318	-2.12456	0.0336234	0.493275	0
BaRT2v18chr5HG228400	244.475	-0.485947	0.228775	-2.12413	0.0336593	0.493376	0
BaRT2v18chr5HG254410	56.4436	0.697175	0.328419	2.12283	0.0337685	0.494573	0
BaRT2v18chr5HG247910	148.117	-0.735879	0.346744	-2.12225	0.0338165	0.494872	dormancy-associated protein homolog 3;Dormancy-associated 3;Auxin-repressed protein
BaRT2v18chr7HG354460	88.8091	0.628588	0.296406	2.1207	0.0339474	0.496385	Biotin synthase
BaRT2v18chr4HG198270	114.083	0.706204	0.333062	2.12034	0.0339774	0.496419	probable glutamyl endopeptidase, chloroplastic
BaRT2v18chr1HG001490	85.8369	0.599097	0.283145	2.11586	0.0343565	0.497964	Serine/arginine-rich splicing factor SR45;RRM domain-containing protein;Ribonucleic acid binding protein S1, putative
BaRT2v18chr1HG021590	1470.85	-0.563045	0.265771	-2.11854	0.0341296	0.497964	Putative aldehyde 5-hydroxylase;Coniferaldehyde 5-hydroxylase;Ferulate-5-hydroxylase (Fragment)
BaRT2v18chr2HG088500	55.9649	-0.625222	0.295466	-2.11605	0.0343404	0.497964	0
BaRT2v18chr3HG119560	883.862	0.574476	0.271338	2.1172	0.0342433	0.497964	Non-specific lipid-transfer protein;Non-specific lipid-transfer protein Cw18;Non-specific lipid-transfer protein 3
BaRT2v18chr3HG128340	179.074	0.764994	0.361783	2.11451	0.0344714	0.497964	KOW domain-containing protein;60S ribosomal protein L26-1;Putative ribosomal protein L26/L24P, eukaryotic/archaeal
BaRT2v18chr4HG193420	232.846	0.619244	0.292771	2.11511	0.0344204	0.497964	0
BaRT2v18chr5HG223640	156.66	-0.475009	0.224535	-2.11553	0.0343851	0.497964	4HBT domain-containing protein;Calcium-dependent protein kinase 2 isoform 1;Acyl-coenzyme A thioesterase 13
BaRT2v18chr5HG224370	81.7823	0.613608	0.290052	2.11551	0.0343869	0.497964	0
BaRT2v18chr5HG255250	265.066	0.715845	0.33853	2.11457	0.034467	0.497964	0
BaRT2v18chr6HG311450	62.5461	-0.619025	0.292438	-2.11678	0.0342789	0.497964	serine/threonine receptor-like kinase NFP;Putative LRR receptor-like serine/threonine-protein kinase At5g48740 family;Proline-rich receptor-like protein kinase PERK9;Protein kinase domain-containing protein;Chitin elicitor receptor kinase 1
BaRT2v18chr7HG330170	20.2088	0.792396	0.374683	2.11484	0.0344433	0.497964	0
BaRT2v18chr7HG365490	9.36433	0.733617	0.346424	2.11768	0.0342018	0.497964	0
BaRT2v18chr7HG366210	34.0047	-0.690634	0.326329	-2.11637	0.034313	0.497964	Protein MICRORCHIDIA 1;MORC family CW-type zinc finger protein 4
BaRT2v18chrUnG389530	238.566	-0.526342	0.248736	-2.11607	0.0343391	0.497964	H(+)/Pi cotransporter;Putative inorganic phosphate transporter 1-7
BaRT2v18chr1HG030730	198.153	0.458594	0.216952	2.1138	0.034532	0.49802	TPX2 (Targeting protein for Xklp2) protein family;Serine/arginine repetitive matrix protein 1-like isoform X2
BaRT2v18chr2HG084550	19.5011	0.763156	0.361084	2.11352	0.0345567	0.49802	TDBD domain-containing protein
BaRT2v18chr5HG240860	29.5636	0.717805	0.33963	2.11349	0.0345586	0.49802	0
BaRT2v18chr6HG328480	503.307	0.587608	0.278083	2.11307	0.034595	0.498146	Ty3/gypsy retrotransposon protein (Fragment)
BaRT2v18chr1HG043720	1610.32	-0.557395	0.263844	-2.11259	0.0346357	0.498332	Tropinone reductase 2
BaRT2v18chr2HG099550	88.5672	0.615128	0.291336	2.1114	0.0347376	0.499398	Zinc finger matrin-type protein 1, putative isoform 1
BaRT2v18chr3HG163150	355.997	-0.575737	0.272735	-2.11098	0.0347743	0.499525	0
BaRT2v18chr2HG068140	900.3	-0.404005	0.191507	-2.10961	0.0348923	0.50027	C2 domain-containing protein;Calcium-dependent lipid-binding (CaLB domain) family protein
BaRT2v18chr2HG086780	13.5682	0.782428	0.370967	2.10916	0.0349312	0.50027	0
BaRT2v18chr3HG153230	93.907	-0.586882	0.278162	-2.10986	0.0348705	0.50027	tRNA synthetases class I (W and Y), putative;Tryptophanyl-tRNA synthetase;Tryptophan--tRNA ligase, cytoplasmic
BaRT2v18chr7HG367740	673.041	-0.457624	0.216978	-2.10908	0.0349375	0.50027	Mannosyl-oligosaccharide 12-alpha-mannosidase MNS1;Transcriptase
BaRT2v18chr4HG179080	24.6237	0.781483	0.370604	2.10868	0.0349726	0.500373	UDP-glucose 6-dehydrogenase 5;UDP-glucose 6-dehydrogenase 3;UDP-glucose 6-dehydrogenase
BaRT2v18chr1HG019150	235.089	0.777786	0.369138	2.10703	0.0351148	0.501512	40S ribosomal protein S17;Ribosomal protein S17e
BaRT2v18chr7HG342030	6.53551	0.739089	0.350813	2.10679	0.035136	0.501512	0
BaRT2v18chr7HG367410	87.6679	0.716706	0.340175	2.10687	0.0351285	0.501512	0
BaRT2v18chr7HG353580	145.613	0.645861	0.306706	2.1058	0.035222	0.50234	ELMO domain-containing protein
BaRT2v18chr6HG287690	119.514	-0.651998	0.309759	-2.10485	0.035304	0.503111	Linalool synthase, chloroplastic
BaRT2v18chr2HG096480	12.8495	0.769773	0.36585	2.10407	0.0353724	0.503286	Glycosyltransferase;Cis-zeatin O-glucosyltransferase 2;Cis-zeatin O-glucosyltransferase 1;Putative cis-zeatin O-glucosyltransferase
BaRT2v18chr7HG347080	296.314	-0.730031	0.346932	-2.10425	0.0353567	0.503286	3-ketoacyl-CoA synthase
BaRT2v18chr1HG046000	14.5157	0.774516	0.36829	2.10301	0.035465	0.503805	0
BaRT2v18chr5HG239290	106.178	0.582619	0.277019	2.10317	0.0354509	0.503805	0
BaRT2v18chr6HG318370	436.875	-0.599875	0.285344	-2.10229	0.0355278	0.504297	0
BaRT2v18chr5HG241330	280.422	0.543226	0.258507	2.1014	0.0356058	0.505007	Erythronate-4-phosphate+dehydrogenase+domain+containing+protein;Hydroxypyruvate reductase-like;Phosphoglycerate dehydrogenase-like protein;Glyoxylate reductase;D-isomer specific 2-hydroxyacid dehydrogenase family protein
BaRT2v18chr2HG104820	71.0887	-0.702817	0.334745	-2.09956	0.0357679	0.506905	Agmatine coumaroyltransferase-2;Anthranilate N-benzoyltransferase protein 1
BaRT2v18chr3HG167000	93.0002	0.673848	0.32111	2.09849	0.0358615	0.506972	Fe2OG dioxygenase domain-containing protein;S-norcoclaurine synthase 1;Oxidoreductase, 2OG-Fe oxygenase family protein, expressed
BaRT2v18chr3HG172930	433.969	0.606476	0.28897	2.09875	0.0358385	0.506972	0
BaRT2v18chr4HG197140	44.3514	-0.675131	0.32185	-2.09766	0.0359352	0.506972	J domain-containing protein
BaRT2v18chr5HG242560	40.4159	0.705547	0.336362	2.09758	0.0359421	0.506972	F-box domain-containing protein
BaRT2v18chr6HG284380	440.355	-0.622795	0.296688	-2.09916	0.0358028	0.506972	Fatty acid hydroperoxide lyase;Allene oxide synthase, chloroplastic
BaRT2v18chr6HG318510	114.656	0.64094	0.305477	2.09816	0.0358909	0.506972	0
BaRT2v18chr2HG093760	20.9792	0.752575	0.359385	2.09406	0.0362544	0.507303	0
BaRT2v18chr2HG104700	6.66833	0.765974	0.365686	2.09462	0.0362047	0.507303	Sulfotransferase
BaRT2v18chr3HG126440	43.7485	0.784192	0.374268	2.09527	0.0361472	0.507303	0
BaRT2v18chr3HG133400	698.827	0.447644	0.213703	2.0947	0.0361977	0.507303	Far-red impaired response-like;Putative transposase
BaRT2v18chr4HG176580	349.414	-0.496963	0.237299	-2.09425	0.0362376	0.507303	0
BaRT2v18chr4HG212170	48.2038	0.642941	0.30705	2.09393	0.0362663	0.507303	0
BaRT2v18chr5HG257000	12.8861	0.785462	0.374664	2.09644	0.0360429	0.507303	DRBM domain-containing protein
BaRT2v18chr5HG258550	53.8652	-0.68385	0.326604	-2.09382	0.0362763	0.507303	0
BaRT2v18chr6HG295240	91.7917	-0.763354	0.364073	-2.09671	0.0360196	0.507303	Disease resistance protein RPP13
BaRT2v18chr6HG314340-BaRT2v18chr6HG314350	64.3916	0.719286	0.343448	2.09431	0.0362327	0.507303	Threonyl-tRNA synthetase
BaRT2v18chr6HG317060	117.845	-0.560447	0.267609	-2.09428	0.0362353	0.507303	AP2-like ethylene-responsive transcription factor AIL7 isoform X1;AP2-like ethylene-responsive transcription factor BBM1;AP2-like ethylene-responsive transcription factor AIL5;AP2-like ethylene-responsive transcription factor AIL1;AP2-like ethylene-responsive transcription factor PLT2
BaRT2v18chr2HG090380	170.158	0.505036	0.241286	2.0931	0.0363399	0.507797	6,7-dimethyl-8-ribityllumazine synthase;6,7-dimethyl-8-ribityllumazine synthase, chloroplastic
BaRT2v18chr1HG008240	86.4657	0.687879	0.328954	2.09111	0.0365184	0.508656	0
BaRT2v18chr1HG045780	1005.65	0.630776	0.301631	2.09122	0.0365088	0.508656	0
BaRT2v18chr2HG099530	50.454	-0.649822	0.310713	-2.09139	0.0364928	0.508656	0
BaRT2v18chr3HG130760	10.1659	-0.771303	0.368897	-2.09083	0.036543	0.508656	0
BaRT2v18chr6HG312020	8.3213	0.747812	0.357455	2.09204	0.0364348	0.508656	Putative RING-H2 finger protein ATL53;RING-type domain-containing protein
BaRT2v18chr7HG366110	50.8117	0.727253	0.347894	2.09044	0.0365779	0.508747	Laccase
BaRT2v18chr4HG202310	184.216	0.533615	0.255399	2.08934	0.0366771	0.509732	0
BaRT2v18chr1HG006800	308.648	-0.55477	0.265634	-2.08847	0.0367551	0.510027	Putative Polycomb group protein ASXL3 (Fragment)
BaRT2v18chr1HG038600	222.407	0.541567	0.259279	2.08874	0.0367312	0.510027	0
BaRT2v18chr3HG142650	76.7199	0.644692	0.308755	2.08803	0.0367947	0.510058	0
BaRT2v18chr7HG380680	152.029	0.494229	0.23672	2.08782	0.0368142	0.510058	0
BaRT2v18chr2HG084200	1099.46	-0.491105	0.235347	-2.08673	0.0369128	0.51103	0
BaRT2v18chr4HG205220	45.4052	0.740662	0.355392	2.08407	0.0371538	0.512927	Leucine-rich repeat receptor-like serine/threonine-protein kinase BAM3;leucine-rich repeat receptor-like serine/threonine-protein kinase BAM1;Leucine-rich repeat receptor-like serine/threonine-protein kinase BAM2;Protein kinase domain-containing protein
BaRT2v18chr5HG265060	1864.19	-0.578414	0.27748	-2.08453	0.0371124	0.512927	0
BaRT2v18chr6HG287050	89.1503	-0.566398	0.27179	-2.08396	0.0371641	0.512927	Glutathionyl-hydroquinone reductase YqjG-like;GST C-terminal domain-containing protein
BaRT2v18chr7HG362050	262.954	0.587367	0.28181	2.08427	0.0371358	0.512927	28 kDa ribonucleoprotein, chloroplastic
BaRT2v18chr7HG363820	174.214	0.553198	0.2656	2.08282	0.0372672	0.513561	CAAX amino terminal protease family protein
BaRT2v18chr7HG384450	20.7778	0.732722	0.35175	2.08308	0.0372443	0.513561	Dirigent protein (Fragment);Pterocarpan synthase 1
BaRT2v18chr1HG012640	115.328	-0.630944	0.303045	-2.08201	0.0373411	0.513935	Adenine nucleotide transporter BT1, chloroplastic/mitochondrial;Protein brittle-1, chloroplastic/amyloplastic
BaRT2v18chr2HG065540	1219.39	0.65818	0.316213	2.08144	0.0373932	0.513935	0
BaRT2v18chr2HG093180	612.895	0.448901	0.215722	2.08093	0.0374407	0.513935	0
BaRT2v18chr3HG137790	451.391	0.463244	0.222644	2.08065	0.0374661	0.513935	0
BaRT2v18chr3HG151250	61.9531	0.689577	0.331356	2.08108	0.0374268	0.513935	Reverse transcriptase domain-containing protein
BaRT2v18chr5HG258070	9.51718	-0.774491	0.372203	-2.08083	0.0374494	0.513935	0
BaRT2v18chr3HG121030	163.283	0.691143	0.332245	2.08022	0.0375053	0.51408	Piriformospora indica-insensitive protein 2
BaRT2v18chr6HG306490	16.1159	0.766462	0.368515	2.07986	0.037538	0.514135	40S ribosomal protein S11;Ribosomal protein S17;Small subunit ribosomal protein S11e
BaRT2v18chr3HG160080	592.849	0.501547	0.241309	2.07845	0.0376684	0.515528	0
BaRT2v18chr2HG085980	259.225	0.53647	0.258174	2.07794	0.0377148	0.515599	Polyadenylate-binding protein RBP47B;Polyadenylate-binding protein RBP47-like;Polyadenylate-binding protein RBP47;Polyadenylate-binding protein RBP47C
BaRT2v18chr3HG152870	25.7979	-0.759442	0.365509	-2.07777	0.037731	0.515599	Basic leucine zipper 23;BZIP domain-containing protein
BaRT2v18chr7HG338350	101.22	-0.525093	0.252815	-2.07699	0.0378026	0.516185	Putative Multidrug resistance-associated protein 14;ABC transporter C family member 10;Putative multidrug-resistance associated protein;MRP-like ABC transporter-like
BaRT2v18chr3HG134260	15.8526	0.769854	0.370872	2.07579	0.0379133	0.517303	DNA gyrase subunit B
BaRT2v18chr5HG267800	6735.31	0.429855	0.207136	2.07523	0.0379655	0.517622	5'-nucleotidase domain-containing protein 4-like isoform X1;Cytosolic purine 5-nucleotidase;5'-nucleotidase domain-containing protein 4;HAD superfamily hydrolase, 5'-Nucleotidase containing protein, expressed;HAD-superfamily hydrolase, subfamily IG, 5'-nucleotidase isoform 2
BaRT2v18chr5HG269350	963.84	-0.500872	0.24146	-2.07434	0.0380474	0.518345	Putative glutathione S-transferase GSTU1;Glutathione transferase6;Glutathione S-transferase GST 19;Glutathione S-transferase
BaRT2v18chr7HG387860	2389.96	0.585456	0.282301	2.07387	0.0380914	0.518552	Sulfotransferase
BaRT2v18chr6HG290720	16.4064	-0.753164	0.363367	-2.07274	0.0381965	0.519588	Subtilisin-like protease
BaRT2v18chr2HG053260	18.6384	-0.751908	0.362994	-2.07141	0.0383207	0.520095	0
BaRT2v18chr6HG299800	13.4307	0.775509	0.374344	2.07165	0.0382985	0.520095	Alba domain-containing protein;DNA/RNA-binding protein Alba-like;Putative DNA/RNA-binding protein Alba-like protein
BaRT2v18chr6HG311270	139.912	0.651957	0.314678	2.07182	0.0382819	0.520095	Rho GTPase-activating protein 3;Rho-GAP domain-containing protein
BaRT2v18chr2HG064000	49.1341	0.640309	0.309179	2.071	0.0383591	0.520223	nitrate regulatory gene2 protein-like;serine/threonine-protein kinase Tao-like;protein ROLLING AND ERECT LEAF 2;DUF632 domain-containing protein;Golgin subfamily A member 4
BaRT2v18chr2HG098920	357.09	0.766479	0.370604	2.06819	0.0386223	0.52077	60S ribosomal protein L7-2
BaRT2v18chr3HG121260	45.8441	-0.676515	0.326863	-2.06972	0.0384783	0.52077	0
BaRT2v18chr5HG271070	165.872	0.643548	0.310979	2.06942	0.0385064	0.52077	Lysine--tRNA ligase
BaRT2v18chr5HG279380	61.8477	0.615173	0.297411	2.06842	0.0386003	0.52077	Polyphosphoinositide binding protein Ssh2p;CRAL-TRIO domain-containing protein;Random slug protein 5
BaRT2v18chr7HG328750	9.14507	0.712776	0.344294	2.07025	0.0384285	0.52077	N-hydroxycinnamoyl benzoyltransferase-like protein;Transferase family;Putative acetyltransferase
BaRT2v18chr7HG342730	412.765	0.55201	0.26679	2.06908	0.0385388	0.52077	LRR receptor-like serine/threonine-protein kinase ERECTA;Protein kinase domain-containing protein
BaRT2v18chr7HG354990	366.263	0.553277	0.267424	2.06892	0.0385539	0.52077	Kinesin motor domain-containing protein;kinesin-like protein KIN-7J isoform X1;Kinesin-like protein KIN-7H;Kinesin-related protein 4
BaRT2v18chr7HG358440	185.646	0.634787	0.306944	2.06809	0.0386314	0.52077	0
BaRT2v18chr2HG103280	1111.85	0.650401	0.31468	2.06687	0.0387468	0.521685	0
BaRT2v18chr7HG373700	711.436	-0.562464	0.272149	-2.06675	0.0387574	0.521685	Protein PHOSPHATE STARVATION RESPONSE 3;HTH myb-type domain-containing protein
BaRT2v18chr4HG200010	1822.01	0.556732	0.269555	2.06538	0.0388873	0.523042	Elongation factor 1-alpha
BaRT2v18chr5HG235100	60.029	0.606005	0.293479	2.0649	0.0389325	0.523258	Serine/threonine-protein kinase KIPK;Serine/threonine-protein kinase KIPK1;serine/threonine-protein kinase D6PKL1;Protein kinase domain-containing protein;serine/threonine-protein kinase D6PK
BaRT2v18chr1HG000110	89.8061	-0.658407	0.318956	-2.06425	0.0389937	0.523462	0
BaRT2v18chr2HG065810	444.281	0.76883	0.372473	2.06412	0.039006	0.523462	0
BaRT2v18chr7HG369330	443.912	-0.496587	0.240624	-2.06375	0.0390415	0.523546	Non-specific serine/threonine protein kinase
BaRT2v18chr6HG293100	18.0038	0.76111	0.36892	2.06308	0.0391051	0.524008	0
BaRT2v18chr1HG010550	10.5014	0.772007	0.374419	2.06188	0.0392193	0.524755	0
BaRT2v18chr3HG160740	28.0317	0.772625	0.374698	2.06199	0.0392085	0.524755	0
BaRT2v18chr2HG053730	271.357	0.526437	0.255561	2.05993	0.0394051	0.525551	Peptidylprolyl isomerase
BaRT2v18chr3HG121000	33.8409	-0.689356	0.33462	-2.06011	0.0393877	0.525551	Protein kinase domain-containing protein
BaRT2v18chr4HG203110	32.4829	0.770043	0.373858	2.05972	0.0394251	0.525551	0
BaRT2v18chr6HG311190	870.671	-0.519794	0.252289	-2.06032	0.0393683	0.525551	SPX domain-containing protein
BaRT2v18chr7HG339000	17.5726	0.767265	0.372308	2.06084	0.0393186	0.525551	BHLH domain-containing protein;Transcription factor SPATULA
BaRT2v18chr5HG242510	9.19046	-0.763998	0.371176	-2.05832	0.0395597	0.525768	0
BaRT2v18chr5HG247880	133.221	0.535464	0.260183	2.05802	0.0395878	0.525768	Respiratory burst oxidase-like protein E;Ferric reductase, NAD binding
BaRT2v18chr5HG270840	271.786	-0.534007	0.259409	-2.05855	0.039537	0.525768	Plant-specific domain TIGR01615 family protein;2-isopropylmalate synthase
BaRT2v18chr5HG276720	879.522	0.552362	0.268282	2.05888	0.0395054	0.525768	Tr-type G domain-containing protein;Elongation factor 2
BaRT2v18chr5HG281750	6.56371	0.733393	0.356299	2.05836	0.0395554	0.525768	0
BaRT2v18chr2HG096510	474.127	-0.473792	0.230303	-2.05726	0.0396617	0.525941	Putative ATP dependent copper transporter;Putative copper-transporting ATPase HMA5;Copper-transporting atpase P-type, putative
BaRT2v18chr2HG097910	80.0569	-0.634556	0.308493	-2.05695	0.0396906	0.525941	0
BaRT2v18chr4HG216530	369.467	-0.723292	0.351681	-2.05667	0.039718	0.525941	Beta-amylase
BaRT2v18chr5HG259120	76.2026	-0.76883	0.373818	-2.0567	0.0397152	0.525941	0
BaRT2v18chr2HG068520	349.969	-0.471854	0.229662	-2.05456	0.0399212	0.528242	0
BaRT2v18chr1HG022910	188.95	-0.48015	0.233762	-2.05401	0.0399744	0.528557	Non-lysosomal glucosylceramidase;Non-lysosomal glucosylceramidase-like isoform X1
BaRT2v18chr1HG022800	495.863	-0.517753	0.252135	-2.05348	0.0400262	0.528852	heavy metal-associated isoprenylated plant protein 39;HMA domain-containing protein;Late blight resistance protein like R1A-3;Heavy metal-associated domain containing protein, expressed
BaRT2v18chr6HG313730	71.5453	0.666032	0.3244	2.05312	0.0400611	0.528925	0
BaRT2v18chr2HG069110	47.5583	0.743573	0.362348	2.05209	0.0401605	0.529569	40S ribosomal protein S13
BaRT2v18chr5HG260840	46.2073	-0.65375	0.31859	-2.05201	0.0401689	0.529569	Nodulin-26 like intrinsic protein;Aquaporin NIP-type
BaRT2v18chr6HG283860	189.175	-0.545132	0.265713	-2.05158	0.0402106	0.52973	0
BaRT2v18chr2HG059890	47.0329	-0.653002	0.318542	-2.04997	0.0403671	0.531402	HTH myb-type domain-containing protein;Transcription factor NIGT1;myb family transcription factor EFM;Two-component response regulator ORR24;Two-component response regulator ARR2
BaRT2v18chr4HG191730	20.8475	0.733371	0.357822	2.04954	0.040409	0.531563	Ubiquitinyl hydrolase 1
BaRT2v18chr1HG048750	454.114	-0.371089	0.181136	-2.04868	0.0404939	0.53229	Protein kinase domain-containing protein
BaRT2v18chr1HG013100	479.384	0.506111	0.247253	2.04693	0.0406646	0.533362	nuclear ubiquitous casein and cyclin-dependent kinase substrate 1-like isoform X2;46 kDa FK506-binding nuclear protein isoform X1;eukaryotic translation initiation factor 4 gamma-like;nucleolar protein 56 isoform X2;neurofilament heavy polypeptide-like
BaRT2v18chr5HG236550	377.1	0.419903	0.205135	2.04696	0.0406617	0.533362	Serine/threonine-protein kinase STY46;Serine/threonine-protein kinase STY8;Serine/threonine-protein kinase HT1 (Fragment)
BaRT2v18chr6HG287960	122.189	-0.565222	0.276056	-2.04749	0.0406098	0.533362	Glycine-rich protein 2;glycine-rich protein 2-like;Putative Glycine-rich protein 2;Cold-shock DNA-binding family protein;Cold shock domain-containing protein 3;glycine-rich protein 2-like isoform X3;Glycine-rich protein 2b
BaRT2v18chr5HG267180	17407.4	-0.361457	0.176628	-2.04643	0.0407139	0.533619	Plastoquinol-plastocyanin reductase;Cytochrome b6f complex subunit, putative, expressed;Cytochrome b6-f complex subunit 7
BaRT2v18chr3HG137780	64.7776	0.614642	0.300512	2.04532	0.0408238	0.533891	D-xylulose reductase;7-cyano-7-deazaguanine synthase
BaRT2v18chr4HG213570	200.339	0.520807	0.254565	2.04587	0.0407689	0.533891	Protein translocase/ protein transporter;Mitochondrial import inner membrane translocase subunit TIM22-2
BaRT2v18chr4HG216110	57.418	0.723877	0.353911	2.04537	0.0408187	0.533891	0
BaRT2v18chr1HG040510	76.2314	0.679886	0.332495	2.0448	0.0408748	0.534156	Transcription factor bHLH87;BHLH domain-containing protein;Transcription factor LATE FLOWERING
BaRT2v18chr3HG123370	1682.95	-0.412419	0.201721	-2.04451	0.0409035	0.534156	Tetratricopeptide-like helical
BaRT2v18chr6HG305800	459.822	-0.449037	0.219695	-2.04391	0.0409627	0.534539	0
BaRT2v18chr3HG148840	363.398	0.587578	0.287573	2.04323	0.0410294	0.535022	0
BaRT2v18chr5HG230300	25.4996	0.753473	0.368947	2.04223	0.0411292	0.535545	Boron transporter;Bicarbonate transporter, eukaryotic
BaRT2v18chr6HG323770	7.12108	0.745886	0.365229	2.04224	0.0411273	0.535545	0
BaRT2v18chr4HG186980	490.076	-0.545315	0.26724	-2.04054	0.0412962	0.536552	Non-specific serine/threonine protein kinase
BaRT2v18chr6HG292470	175.018	-0.479903	0.235121	-2.04109	0.0412417	0.536552	Peroxidase
BaRT2v18chr7HG360730	575.768	-0.395429	0.193763	-2.04079	0.0412717	0.536552	DUF676 domain-containing protein;Serine esterase family protein
BaRT2v18chr3HG128570	9.46872	0.762059	0.373979	2.03771	0.0415794	0.539841	0
BaRT2v18chr4HG178480	53.2164	-0.609891	0.299422	-2.0369	0.0416604	0.540501	Putative vacuolar protein sorting-associated protein Ist1;suppressor protein SRP40;Regulator of Vps4 activity in the MVB pathway protein;DUF292 domain-containing protein;Vacuolar protein sorting-associated protein
BaRT2v18chr2HG103230	55.0722	0.643437	0.316169	2.0351	0.0418407	0.541493	0
BaRT2v18chr3HG170640	455.225	-0.42588	0.209346	-2.03434	0.0419178	0.541493	0
BaRT2v18chr4HG205170	526.491	-0.649564	0.319141	-2.03535	0.0418155	0.541493	Erythronate-4-phosphate dehydrogenase family protein isoform 1
BaRT2v18chr5HG275380	202.119	0.56688	0.278636	2.03448	0.0419031	0.541493	TOG domain-containing protein;Hsp70 nucleotide exchange factor like;Armadillo/beta-catenin-like repeat family protein, expressed;hsp70-binding protein 1 isoform X1;Hsp70-binding protein 1;Armadillo
BaRT2v18chr7HG338720	328.591	0.530546	0.2607	2.03508	0.0418423	0.541493	0
BaRT2v18chr7HG373820	157.131	-0.562748	0.276583	-2.03464	0.041887	0.541493	Disease resistance protein RPM1;NB-ARC domain, putative;NB-ARC domain-containing protein
BaRT2v18chr4HG179670	11.8472	0.75997	0.373704	2.03362	0.0419904	0.54182	0
BaRT2v18chr7HG384290	244.372	0.477695	0.234914	2.03349	0.0420034	0.54182	large ribosomal RNA subunit accumulation protein YCED homolog 1, chloroplastic
BaRT2v18chr5HG224950	63.5234	0.632533	0.311232	2.03235	0.0421184	0.542913	Homeobox-leucine zipper protein HOX32;HB homeobox transcription factor (Fragment);START domain-containing protein
BaRT2v18chr1HG000020	5731.08	0.48446	0.238425	2.03192	0.0421615	0.543079	0
BaRT2v18chr2HG056970	60.4146	-0.590948	0.290915	-2.03134	0.04222	0.543443	nascent polypeptide-associated complex subunit alpha-like protein 1;NAC-A/B domain-containing protein;Ubiquitin-associated domain/translation elongation factor EF-Ts;UBA domain-containing protein/NAC domain-containing protein
BaRT2v18chr5HG264490	8.9893	0.662958	0.326606	2.02984	0.0423726	0.545016	0
BaRT2v18chr5HG271210	43.6039	-0.638469	0.314613	-2.02938	0.0424199	0.545234	WRKY domain-containing protein
BaRT2v18chr5HG232590	81.8663	0.605156	0.298335	2.02844	0.0425152	0.546068	0
BaRT2v18chr7HG358320	229.63	-0.487236	0.240278	-2.0278	0.0425804	0.546515	Transmembrane 9 superfamily member
BaRT2v18chr1HG022430	228.254	-0.58048	0.286583	-2.02552	0.042814	0.547166	Arogenate dehydratase;Prephenate dehydratase
BaRT2v18chr2HG084320	2646.92	0.646157	0.318807	2.0268	0.0426833	0.547166	GrpE protein homolog
BaRT2v18chr4HG192770	13.8336	0.756874	0.373543	2.0262	0.0427439	0.547166	0
BaRT2v18chr4HG201520	62.5634	0.751721	0.371007	2.02617	0.0427479	0.547166	E3 ubiquitin-protein ligase XB3;Putative E3 ubiquitin-protein ligase XBAT31;Ankyrin repeat domain-containing protein 28
BaRT2v18chr4HG214680	14.4696	0.758176	0.374241	2.0259	0.0427747	0.547166	0
BaRT2v18chr6HG284040	6.65323	-0.716404	0.353673	-2.02561	0.042805	0.547166	Calcium binding EGF domain containing protein, expressed;Protein kinase domain-containing protein
BaRT2v18chr4HG220240	867.99	0.515596	0.254618	2.02498	0.0428695	0.547486	0
BaRT2v18chr2HG100230	54.1593	0.71376	0.35324	2.02061	0.0433204	0.549422	F-box/kelch-repeat protein At5g60570;F-box/kelch-repeat protein;F-box/kelch-repeat protein SKIP11;Kelch repeat type 1
BaRT2v18chr3HG122790	1382.64	0.491553	0.243139	2.0217	0.0432077	0.549422	aspartate--tRNA ligase, chloroplastic/mitochondrial;aspartate--tRNA ligase, chloroplastic/mitochondrial isoform X1;Aspartyl/Asparaginyl-tRNA synthetase, class IIb;Aspartyl-tRNA synthetase, putative
BaRT2v18chr3HG131530	1683.96	-0.447999	0.221676	-2.02096	0.0432835	0.549422	Transcription activator GLK1;HTH myb-type domain-containing protein;Putative transcription factor OsGLK2 (Fragment)
BaRT2v18chr3HG148660	17.3585	-0.753824	0.373062	-2.02064	0.0433173	0.549422	GATA transcription factor;GATA-type domain-containing protein
BaRT2v18chr5HG228830	62.294	0.65092	0.322043	2.02122	0.0432568	0.549422	0
BaRT2v18chr5HG246470	127.462	-0.493684	0.244299	-2.02082	0.0432981	0.549422	Zinc finger, MYND-type
BaRT2v18chr5HG254600	45.2771	-0.74045	0.366461	-2.02054	0.0433271	0.549422	0
BaRT2v18chr5HG265900	32.8277	-0.756268	0.374249	-2.02076	0.0433044	0.549422	Senescence-specific cysteine protease SAG39;Vignain
BaRT2v18chr7HG342850	34.2252	0.646471	0.319827	2.02132	0.043247	0.549422	omega-amidase, chloroplastic;Nitrilase/cyanide hydratase and apolipoprotein N-acyltransferase family protein (Fragment);omega-amidase, chloroplastic-like isoform X1;CN hydrolase domain-containing protein;Omega-amidase NIT2
BaRT2v18chr7HG369040	212.646	-0.454757	0.225059	-2.02061	0.0433201	0.549422	FAD-binding PCMH-type domain-containing protein;Inactive tetrahydrocannabinolic acid synthase
BaRT2v18chr3HG164410	1821.85	-0.421108	0.208499	-2.01971	0.0434132	0.549907	F-box/kelch-repeat protein At1g67480;Kelch repeat-containing F-box protein-like;Acyl-[acyl-carrier-protein] desaturase;F-box domain
BaRT2v18chr4HG196030	3071.27	0.566988	0.280786	2.01929	0.0434572	0.549907	Uroporphyrinogen decarboxylase
BaRT2v18chr7HG328540	1117.54	0.46913	0.232313	2.01939	0.0434466	0.549907	0
BaRT2v18chr1HG001840	95.1471	-0.67489	0.334448	-2.01793	0.043599	0.550236	Phenolic glucoside malonyltransferase 2;Putative quercetin 3-O-glucoside-6''-O-malonyltransferase;Anthocyanin 5-aromatic acyltransferase
BaRT2v18chr4HG210940	321.806	-0.466726	0.231198	-2.01873	0.0435157	0.550236	Patatin
BaRT2v18chr5HG276320	242.381	-0.463396	0.229647	-2.01786	0.0436058	0.550236	0
BaRT2v18chr6HG292430	162.03	-0.483881	0.239774	-2.01807	0.0435841	0.550236	Sn1-specific diacylglycerol lipase alpha;Lipase, class 3
BaRT2v18chr1HG003000	10.8897	-0.754711	0.374183	-2.01696	0.0437001	0.551039	Putative clathrin assembly protein;ENTH domain-containing protein;ANTH domain-containing protein
BaRT2v18chr3HG137870	560.69	0.503715	0.249777	2.01666	0.0437311	0.551043	0
BaRT2v18chr6HG316950	670.101	0.463819	0.230162	2.01518	0.0438855	0.552213	0
BaRT2v18chr6HG326500	45.6795	-0.642276	0.318675	-2.01546	0.0438569	0.552213	Protein kinase domain-containing protein
BaRT2v18chr2HG069990	2103.46	0.337793	0.167772	2.0134	0.0440723	0.553365	0
BaRT2v18chr3HG159210	792.635	0.447787	0.222376	2.01365	0.0440463	0.553365	0
BaRT2v18chr6HG291670	1419.74	-0.574288	0.2853	-2.01293	0.0441222	0.553365	Kua-ubiquitin conjugating enzyme hybrid, localization;Ubiquitin-conjugating enzyme E2 variant;Transmembrane protein 189 family;Fatty acid desaturase 4, chloroplastic
BaRT2v18chr7HG359370	2997.74	0.497533	0.247096	2.01352	0.0440598	0.553365	0
BaRT2v18chr7HG361710	21.9373	0.750487	0.372849	2.01284	0.0441312	0.553365	0
BaRT2v18chr1HG025590	58.8577	0.625245	0.310744	2.01209	0.04421	0.55364	0
BaRT2v18chr2HG086550	8.64467	0.724495	0.360078	2.01205	0.0442147	0.55364	Aldose 1-epimerase
BaRT2v18chr1HG012320	126.481	-0.512694	0.255034	-2.0103	0.0443996	0.555567	0
BaRT2v18chr5HG228320	217.731	0.551837	0.274547	2.00999	0.0444324	0.555591	0
BaRT2v18chr1HG020960	9.35193	-0.711016	0.354088	-2.00802	0.044641	0.557811	0
BaRT2v18chr5HG268610	216.069	0.740584	0.368948	2.00728	0.0447197	0.558405	0
BaRT2v18chr3HG119000	13.533	-0.751848	0.374697	-2.00655	0.0447979	0.558605	Protein kinase domain-containing protein
BaRT2v18chr4HG206730	14.3561	0.737574	0.367537	2.0068	0.0447706	0.558605	Beta-glucosidase 6;4-hydroxy-7-methoxy-3-oxo-3,4-dihydro-2H-1,4-benzoxazin-2-yl glucosidebeta-D-glucosidase;Beta-glucosidase 40;Beta-glucosidase 34;Beta-glucosidase 11
BaRT2v18chr2HG077880	728.436	-0.447728	0.223508	-2.00318	0.0451577	0.560306	Succinate dehydrogenase [ubiquinone] flavoprotein subunit, mitochondrial;Succinate dehydrogenase1
BaRT2v18chr3HG125380	433.666	0.58824	0.293669	2.00308	0.0451691	0.560306	0
BaRT2v18chr3HG162500	874.607	-0.463046	0.231105	-2.00362	0.0451111	0.560306	0
BaRT2v18chr4HG188540	29.7928	0.728007	0.363426	2.00318	0.0451585	0.560306	Non-reducing end alpha-L-arabinofuranosidase
BaRT2v18chr6HG306760	68.115	-0.719581	0.358967	-2.00459	0.0450071	0.560306	Protein kinase domain-containing protein;Putative LRR receptor-like serine/threonine-protein kinase
BaRT2v18chr7HG368850	447.867	0.603381	0.301171	2.00345	0.0451291	0.560306	0
BaRT2v18chr7HG374380	897.732	-0.500592	0.249929	-2.00294	0.0451839	0.560306	Putative carboxylesterase 15
BaRT2v18chr7HG387120	9.11781	-0.73906	0.368655	-2.00475	0.0449902	0.560306	0
BaRT2v18chr6HG325310	4221.09	-0.364274	0.181933	-2.00224	0.0452591	0.56085	0
BaRT2v18chr1HG021700	13.9534	-0.744125	0.371857	-2.0011	0.0453814	0.560897	PORR domain-containing protein;protein ROOT PRIMORDIUM DEFECTIVE 1;Plant organelle RNA recognition domain;Membrane associated salt-inducible protein, putative;Ubiquitin carboxyl-terminal hydrolase family protein
BaRT2v18chr5HG259090	181.116	0.698212	0.348826	2.0016	0.0453274	0.560897	Diacylglycerol O-acyltransferase
BaRT2v18chr7HG335910	151.635	0.736904	0.36826	2.00104	0.0453878	0.560897	Superoxide dismutase
BaRT2v18chr7HG338080	55.7146	-0.641893	0.320737	-2.00131	0.0453595	0.560897	Succinate dehydrogenase assembly factor 4, mitochondrial
BaRT2v18chr1HG018120	69.2336	-0.643473	0.321768	-1.9998	0.0455216	0.560928	0
BaRT2v18chr2HG070820	24.8726	-0.705099	0.352521	-2.00016	0.0454827	0.560928	0
BaRT2v18chr4HG215790	2332.81	0.541792	0.270885	2.00008	0.0454914	0.560928	0
BaRT2v18chr4HG216210	48.1025	0.729224	0.36469	1.99957	0.0455465	0.560928	Mechanosensitive ion channel protein
BaRT2v18chr7HG338600	324.842	-0.452845	0.226398	-2.00022	0.0454768	0.560928	Methyltransferase-like protein 5;MTS domain-containing protein;DNA methylase, N-6 adenine-specific, conserved site-containing protein
BaRT2v18chr1HG014590	2824.21	0.418921	0.209604	1.99863	0.0456483	0.561796	Heat shock 70 kDa protein 6 chloroplastic
BaRT2v18chr5HG278530	22.7374	-0.748671	0.374718	-1.99796	0.0457209	0.562305	Receptor-like serine/threonine-protein kinase;D-mannose binding lectin family protein, expressed
BaRT2v18chr2HG113630	36.7827	0.684257	0.342588	1.99732	0.0457904	0.562389	0
BaRT2v18chr4HG195120	739.801	0.495953	0.248274	1.9976	0.0457601	0.562389	ATP-dependent Clp protease proteolytic subunit
BaRT2v18chr3HG129610	10.8186	-0.736779	0.369139	-1.99594	0.0459408	0.56308	0
BaRT2v18chr6HG289080	32.4443	0.746709	0.37408	1.99612	0.0459206	0.56308	Pentatricopeptide repeat-containing protein
BaRT2v18chr7HG368780-BaRT2v18chr7HG368790	51.2066	-0.705986	0.353692	-1.99605	0.0459285	0.56308	0
BaRT2v18chr6HG321650	1103.66	0.650718	0.326108	1.9954	0.045999	0.563409	0
BaRT2v18chr4HG193230	401.787	-0.471643	0.23642	-1.99493	0.0460501	0.56365	1-phosphatidylinositol-3-phosphate 5-kinase;1-phosphatidylinositol-3-phosphate 5-kinase FAB1B;PIPK domain-containing protein;Putative 1-phosphatidylinositol-3-phosphate 5-kinase
BaRT2v18chr6HG296570	33.2568	-0.6418	0.321837	-1.99417	0.0461331	0.563898	Core-2/I-branching beta-16-N-acetylglucosaminyltransferase family protein
BaRT2v18chr7HG374650	20.2422	-0.745946	0.374052	-1.99423	0.0461267	0.563898	Protein-serine/threonine phosphatase
BaRT2v18chr1HG035470	27.5771	0.735461	0.369186	1.99212	0.0463584	0.564118	0
BaRT2v18chr2HG069720	1043.66	0.507627	0.254708	1.99298	0.0462638	0.564118	0
BaRT2v18chr3HG157710	365.968	-0.591346	0.296796	-1.99243	0.0463235	0.564118	0
BaRT2v18chr5HG238760	176.249	-0.4471	0.224448	-1.992	0.046371	0.564118	0
BaRT2v18chr5HG265630	273.289	0.65749	0.330041	1.99214	0.0463552	0.564118	Beta-glucosidase BoGH3B;Glycosyl hydrolase family 3 N terminal domain containing protein, expressed;Lysosomal beta glucosidase
BaRT2v18chr6HG308670	7.55538	0.626011	0.314209	1.99234	0.046334	0.564118	NAC domain-containing protein
BaRT2v18chr7HG344030	10.1088	0.739925	0.371163	1.99353	0.0462034	0.564118	SHSP domain-containing protein;26.2 kDa heat shock protein, mitochondrial
BaRT2v18chr1HG046940	590.219	-0.539615	0.271075	-1.99065	0.0465192	0.565154	Fucosyltransferase;Galactoside 2-alpha-L-fucosyltransferase
BaRT2v18chr2HG108630	309.293	0.566687	0.28464	1.99089	0.0464931	0.565154	Aspergillus nuclease S(1)
BaRT2v18chr3HG119940	105.678	-0.643036	0.323169	-1.98978	0.046615	0.565936	Peptide transporter;Peptide transporter PTR1;H+/oligopeptide symporter
BaRT2v18chr3HG125550	3143.53	-0.40402	0.203087	-1.98939	0.0466584	0.56608	Raffinose synthase or seed imbibition protein Sip1 containing protein, expressed;Galactinol--sucrose galactosyltransferase;Stachyose synthase;Putative galactinol--sucrose galactosyltransferase, Alpha-galactosidase
BaRT2v18chr5HG271100	293.043	0.58439	0.293885	1.9885	0.0467567	0.56689	0
BaRT2v18chr6HG311350	47.0789	0.658821	0.331452	1.98769	0.0468465	0.567595	DDA1 domain-containing protein;Ste24 endopeptidase;Pentatricopeptide repeat-containing protein
BaRT2v18chr1HG004230	148.03	0.622727	0.313523	1.98623	0.047008	0.568401	0
BaRT2v18chr2HG067110	4454.63	-0.478187	0.240724	-1.98645	0.0469831	0.568401	Eukaryotic translation initiation factor 5A;Putative translation elongation factor IF5A;eIF-5a domain-containing protein
BaRT2v18chr6HG312170	10.8135	0.727319	0.366139	1.98646	0.0469827	0.568401	0
BaRT2v18chr5HG255990	79.9105	-0.523299	0.263566	-1.98546	0.0470934	0.569051	0
BaRT2v18chr4HG187940	545.695	0.40342	0.203263	1.98472	0.0471759	0.569664	Ferritin;Ferritin-1, chloroplastic
BaRT2v18chr1HG031770	55	0.668093	0.336922	1.98293	0.0473755	0.570157	0
BaRT2v18chr2HG110100	532.12	0.583826	0.294395	1.98314	0.0473522	0.570157	0
BaRT2v18chr3HG153730	115.409	0.615602	0.310294	1.98393	0.0472632	0.570157	0
BaRT2v18chr5HG281660	13.6432	0.737434	0.371869	1.98305	0.047362	0.570157	0
BaRT2v18chr7HG355560	220.391	0.44643	0.225051	1.98369	0.0472906	0.570157	0
BaRT2v18chr5HG273790	360.834	-0.459446	0.231776	-1.98228	0.0474474	0.570258	Cysteine synthase 2-like isoform X1;Na-translocating NADH-quinone reductase subunit A;Pre-mRNA-splicing factor like
BaRT2v18chr6HG290630	236.911	-0.452741	0.228384	-1.98237	0.0474384	0.570258	0
BaRT2v18chr5HG267410	6682.47	0.472159	0.238255	1.98174	0.0475083	0.570608	30S ribosomal protein S9
BaRT2v18chr4HG197420	270.559	-0.44301	0.223639	-1.98092	0.0476007	0.570954	0
BaRT2v18chr5HG244010	491.226	0.541069	0.27313	1.98099	0.047592	0.570954	Nudix hydrolase domain-containing protein
BaRT2v18chr3HG132720	9.52304	0.724417	0.365936	1.97963	0.0477455	0.572309	0
BaRT2v18chr2HG071530	829.875	-0.489138	0.247223	-1.97853	0.0478688	0.573404	0
BaRT2v18chr1HG038830	288.148	0.519993	0.262963	1.97744	0.0479919	0.574495	Proline iminopeptidase
BaRT2v18chr2HG064690	8.32986	-0.704497	0.356387	-1.97677	0.0480673	0.575014	Glycosyltransferase
BaRT2v18chr5HG262690	132.142	0.57894	0.292925	1.97641	0.0481086	0.575125	Benzyl alcohol O-benzoyltransferase;10-deacetylbaccatin III 10-O-acetyltransferase;Benzoyl-CoA transferase 1
BaRT2v18chr3HG162850	267.426	0.578289	0.292665	1.97594	0.0481612	0.57533	0
BaRT2v18chr5HG255970	152.594	0.60476	0.306101	1.97569	0.0481899	0.57533	0
BaRT2v18chr4HG184620	206.177	-0.4136	0.209485	-1.97437	0.04834	0.576739	0
BaRT2v18chr5HG222460	539.36	-0.535954	0.27154	-1.97376	0.0484091	0.57718	0
BaRT2v18chr2HG093100	14.4918	-0.732496	0.371284	-1.97287	0.04851	0.577869	Sphingolipid delta(4)-desaturase DES1-like
BaRT2v18chr3HG170270	295.908	0.509062	0.258166	1.97184	0.0486277	0.577869	Phosphatidylserine decarboxylase proenzyme 2
BaRT2v18chr6HG288790	14.4958	0.736293	0.373386	1.97193	0.0486172	0.577869	0
BaRT2v18chr7HG332010	186.74	0.503494	0.255328	1.97195	0.0486154	0.577869	Chloroplast zebra-necrosis protein;Nickel/cobalt transporter, high-affinity;NicO domain-containing protein;Urease accessory protein UreH;High-affinity nickel-transport family protein
BaRT2v18chr7HG350210	40.908	-0.644675	0.326908	-1.97204	0.0486054	0.577869	0
BaRT2v18chr5HG229240	22.8408	0.709036	0.359635	1.97154	0.0486616	0.577875	Pentatricopeptide repeat-containing protein;PPR repeat;Pentatricopeptide, putative, expressed;Tetratricopeptide repeat (TPR)-like superfamily protein, putative
BaRT2v18chr7HG379420	669.381	0.459388	0.233041	1.97127	0.0486926	0.577875	14 kDa zinc-binding protein;HIT domain-containing protein;Putative adenylylsulfatase
BaRT2v18chr1HG044000	56.4585	0.702197	0.356515	1.96962	0.0488824	0.579744	0
BaRT2v18chr1HG009110	46.2196	0.654973	0.332687	1.96874	0.0489829	0.579814	0
BaRT2v18chr5HG234320	16.3631	0.724896	0.368207	1.96872	0.0489852	0.579814	0
BaRT2v18chr6HG290640	105.735	-0.635761	0.3229	-1.96891	0.0489637	0.579814	Zinc transporter 2;Fe2+/Zn2+ regulated transporter
BaRT2v18chr3HG163980	543.368	-0.389129	0.197852	-1.96677	0.04921	0.582091	Transaldolase
BaRT2v18chr3HG130870	7971.07	0.514906	0.262211	1.96371	0.0495642	0.585509	0
BaRT2v18chr4HG208530	11.5976	-0.734829	0.374154	-1.96397	0.049533	0.585509	LL-diaminopimelate aminotransferase, chloroplastic;LL-diaminopimelate aminotransferase, chloroplastic isoform X3;LL-diaminopimelate aminotransferase
BaRT2v18chr1HG023720	8.40991	-0.733606	0.373736	-1.9629	0.049658	0.586232	Putative wall-associated receptor kinase-like 16
BaRT2v18chr6HG309590	24.1528	-0.69339	0.353403	-1.96204	0.0497581	0.587028	0
BaRT2v18chr3HG162730	219.124	-0.528439	0.269447	-1.9612	0.0498562	0.587799	Auxin efflux carrier component
BaRT2v18chr7HG335930	294.687	0.492859	0.251391	1.96053	0.0499339	0.588328	0
BaRT2v18chr1HG030450	276.523	0.652896	0.333316	1.95879	0.0501374	0.589217	Putative proton-dependent oligopeptide transporter (POT);Putative nitrite transporter
BaRT2v18chr2HG092400	6.83007	0.615508	0.31427	1.95853	0.0501675	0.589217	0
BaRT2v18chr3HG130130	167.838	-0.435778	0.22256	-1.95802	0.0502272	0.589217	GDSL esterase/lipase
BaRT2v18chr4HG198380	46.7865	-0.644904	0.32927	-1.95858	0.0501615	0.589217	0
BaRT2v18chr4HG206050	278.994	-0.549756	0.280772	-1.95802	0.0502277	0.589217	Receptor-like serine/threonine-protein kinase
[truncated: 37,887 more rows]

## Sheet: Electron
Differentially expressed genes in plants after exposure to electrons
[truncated: 39,417 more rows]

[truncated: 6 more sheets: Proton, e+g, g+p, p+e , all type, color legend ]
