# Supplementary material for: Comparative Analysis of the Effect of Gamma-, Electron, and Proton Irradiation on Transcriptomic Profile of Hordeum vulgare L. Seedlings: In Search for Molecular Contributors to Abiotic Stress Resilience
Source: Plants (Basel). 2024 Jan 23;13(3):342. doi: 10.3390/plants13030342 (PMC10857502; doi:10.3390/plants13030342)
Supplement: Supplementary file 1 [file plants-13-00342-s001.zip › Supplementary table S2_GO enrichment.xlsx]

## Sheet: all
GO enrichment analysis results
Column1	Column2	Column3	Column4	Column5	Column6	Column7
All	MF
Enrichment FDR	nGenes	Pathway Genes	Fold Enrichment	Pathway	URL	Genes
0.00465931450486223	1	11	900.98119122257	Single-stranded RNA binding	http://amigo.geneontology.org/cgi-bin/amigo/term_details?term=GO:0003727	HORVU.MOREX.R3.7HG0680970
8.68743340458127e-05	2	30	660.719540229885	Cellulose synthase activity	http://amigo.geneontology.org/cgi-bin/amigo/term_details?term=GO:0016759	HORVU.MOREX.R3.1HG0041280 HORVU.MOREX.R3.3HG0288960
0.00635206365787847	1	16	619.424568965517	Protein folding chaperone	http://amigo.geneontology.org/cgi-bin/amigo/term_details?term=GO:0044183	HORVU.MOREX.R3.5HG0496010
8.68743340458127e-05	2	38	521.620689655172	Oxidoreductase activity, acting on diphenols and related substances as donors	http://amigo.geneontology.org/cgi-bin/amigo/term_details?term=GO:0016679	HORVU.MOREX.R3.1HG0073500 HORVU.MOREX.R3.3HG0302570
0.00700591638626637	1	20	495.539655172414	Pseudouridine synthase activity	http://amigo.geneontology.org/cgi-bin/amigo/term_details?term=GO:0009982	HORVU.MOREX.R3.2HG0116520
0.00730238342305088	1	23	430.904047976012	Beta-galactosidase activity	http://amigo.geneontology.org/cgi-bin/amigo/term_details?term=GO:0004565	HORVU.MOREX.R3.4HG0402760
0.00836787571348001	1	29	341.751486325803	Phosphotransferase activity, phosphate group as acceptor	http://amigo.geneontology.org/cgi-bin/amigo/term_details?term=GO:0016776	HORVU.MOREX.R3.1HG0057590
0.0122555695667154	1	58	170.875743162901	Structural constituent of ribosome	http://amigo.geneontology.org/cgi-bin/amigo/term_details?term=GO:0003735	HORVU.MOREX.R3.4HG0332030
0.0147130141183038	1	72	137.649904214559	Phospholipid binding	http://amigo.geneontology.org/cgi-bin/amigo/term_details?term=GO:0005543	HORVU.MOREX.R3.2HG0111570
0.00125382917076809	2	203	97.6432818073722	Isomerase activity	http://amigo.geneontology.org/cgi-bin/amigo/term_details?term=GO:0016853	HORVU.MOREX.R3.5HG0496010 HORVU.MOREX.R3.2HG0116520
0.0203593106165873	1	103	96.2212922664881	Manganese ion binding	http://amigo.geneontology.org/cgi-bin/amigo/term_details?term=GO:0030145	HORVU.MOREX.R3.3HG0252270
0.0216685542397074	1	120	82.5899425287356	Aspartic-type endopeptidase activity	http://amigo.geneontology.org/cgi-bin/amigo/term_details?term=GO:0004190	HORVU.MOREX.R3.3HG0274060
0.0221945923890657	1	130	76.2368700265252	Serine-type endopeptidase activity	http://amigo.geneontology.org/cgi-bin/amigo/term_details?term=GO:0004252	HORVU.MOREX.R3.6HG0620630
0.00329183856938803	2	381	52.0251606480224	Endopeptidase activity	http://amigo.geneontology.org/cgi-bin/amigo/term_details?term=GO:0004175	HORVU.MOREX.R3.3HG0274060 HORVU.MOREX.R3.6HG0620630
0.0334570195379435	1	241	41.123622835885	Peroxidase activity	http://amigo.geneontology.org/cgi-bin/amigo/term_details?term=GO:0004601	HORVU.MOREX.R3.7HG0737470
0.000977618612559409	3	991	30.0024009186123	Transition metal ion binding	http://amigo.geneontology.org/cgi-bin/amigo/term_details?term=GO:0046914	HORVU.MOREX.R3.1HG0073500 HORVU.MOREX.R3.3HG0252270 HORVU.MOREX.R3.3HG0302570
0.010148223653549	2	913	21.7103901499415	RNA binding	http://amigo.geneontology.org/cgi-bin/amigo/term_details?term=GO:0003723	HORVU.MOREX.R3.2HG0116520 HORVU.MOREX.R3.7HG0680970
0.00329183856938803	3	1750	16.9899310344828	Oxidoreductase activity	http://amigo.geneontology.org/cgi-bin/amigo/term_details?term=GO:0016491	HORVU.MOREX.R3.1HG0073500 HORVU.MOREX.R3.3HG0302570 HORVU.MOREX.R3.7HG0737470
0.0238119523985281	2	1809	10.9572063056366	Kinase activity	http://amigo.geneontology.org/cgi-bin/amigo/term_details?term=GO:0016301	HORVU.MOREX.R3.1HG0057590 HORVU.MOREX.R3.1HG0012160
All	CelC
Enrichment FDR	nGenes	Pathway Genes	Fold Enrichment	Pathway	URL	Genes
0.00893565182016023	1	23	430.904047976012	Nuclear chromatin	http://amigo.geneontology.org/cgi-bin/amigo/term_details?term=GO:0000790	HORVU.MOREX.R3.5HG0520550
1.06506526693202e-05	3	172	172.862670408982	Apoplast	http://amigo.geneontology.org/cgi-bin/amigo/term_details?term=GO:0048046	HORVU.MOREX.R3.1HG0073500 HORVU.MOREX.R3.3HG0252270 HORVU.MOREX.R3.3HG0302570
0.0174080088502965	1	62	159.851501668521	Ribosome	http://amigo.geneontology.org/cgi-bin/amigo/term_details?term=GO:0005840	HORVU.MOREX.R3.4HG0332030
0.0174080088502965	1	68	145.746957403651	Plant-type cell wall	http://amigo.geneontology.org/cgi-bin/amigo/term_details?term=GO:0009505	HORVU.MOREX.R3.7HG0737470
1.34154798987535e-05	3	233	127.606778155986	Cell wall	http://amigo.geneontology.org/cgi-bin/amigo/term_details?term=GO:0005618	HORVU.MOREX.R3.4HG0402760 HORVU.MOREX.R3.7HG0737470 HORVU.MOREX.R3.3HG0252270
1.06506526693202e-05	4	667	59.4350411001396	Extracellular region	http://amigo.geneontology.org/cgi-bin/amigo/term_details?term=GO:0005576	HORVU.MOREX.R3.1HG0073500 HORVU.MOREX.R3.3HG0252270 HORVU.MOREX.R3.3HG0302570 HORVU.MOREX.R3.7HG0737470
0.030780836099851	1	198	50.0545106234761	Vacuole	http://amigo.geneontology.org/cgi-bin/amigo/term_details?term=GO:0005773	HORVU.MOREX.R3.4HG0402760
0.0316520419649525	1	233	42.5355927186621	Photosynthetic membrane	http://amigo.geneontology.org/cgi-bin/amigo/term_details?term=GO:0034357	HORVU.MOREX.R3.7HG0680970
3.13142626601863e-05	4	1150	34.472323838081	Cell periphery	http://amigo.geneontology.org/cgi-bin/amigo/term_details?term=GO:0071944	HORVU.MOREX.R3.4HG0402760 HORVU.MOREX.R3.7HG0737470 HORVU.MOREX.R3.1HG0041280 HORVU.MOREX.R3.3HG0252270
0.00893565182016023	2	738	26.8585178955238	Non-membrane-bounded organelle	http://amigo.geneontology.org/cgi-bin/amigo/term_details?term=GO:0043228	HORVU.MOREX.R3.4HG0332030 HORVU.MOREX.R3.5HG0520550
All	BioP
Enrichment FDR	nGenes	Pathway Genes	Fold Enrichment	Pathway	URL	Genes
0.00405519618701339	1	6	1651.79885057471	Positive regulation of histone modification	http://amigo.geneontology.org/cgi-bin/amigo/term_details?term=GO:0031058	HORVU.MOREX.R3.5HG0520550
0.00405519618701339	1	6	1651.79885057471	GTP metabolic process	http://amigo.geneontology.org/cgi-bin/amigo/term_details?term=GO:0046039	HORVU.MOREX.R3.1HG0057590
0.00035591799849562	2	24	825.899425287356	Phenylpropanoid catabolic process	http://amigo.geneontology.org/cgi-bin/amigo/term_details?term=GO:0046271	HORVU.MOREX.R3.1HG0073500 HORVU.MOREX.R3.3HG0302570
0.00035591799849562	2	29	683.502972651605	Plant-type secondary cell wall biogenesis	http://amigo.geneontology.org/cgi-bin/amigo/term_details?term=GO:0009834	HORVU.MOREX.R3.1HG0041280 HORVU.MOREX.R3.3HG0288960
0.00621062386578525	1	20	495.539655172414	de novo protein folding	http://amigo.geneontology.org/cgi-bin/amigo/term_details?term=GO:0006458	HORVU.MOREX.R3.5HG0496010
0.00703375950661631	1	25	396.431724137931	Pseudouridine synthesis	http://amigo.geneontology.org/cgi-bin/amigo/term_details?term=GO:0001522	HORVU.MOREX.R3.2HG0116520
0.00812323262101298	1	34	291.493914807302	DNA-templated transcription, termination	http://amigo.geneontology.org/cgi-bin/amigo/term_details?term=GO:0006353	HORVU.MOREX.R3.7HG0680970
0.00133231273003103	2	136	145.746957403651	Protein folding	http://amigo.geneontology.org/cgi-bin/amigo/term_details?term=GO:0006457	HORVU.MOREX.R3.5HG0496010 HORVU.MOREX.R3.2HG0119860
0.00219551217244346	2	218	90.9247073710851	Peptidyl-amino acid modification	http://amigo.geneontology.org/cgi-bin/amigo/term_details?term=GO:0018193	HORVU.MOREX.R3.5HG0496010 HORVU.MOREX.R3.5HG0520550
0.00367879871378225	2	307	64.5654273840279	Response to oxidative stress	http://amigo.geneontology.org/cgi-bin/amigo/term_details?term=GO:0006979	HORVU.MOREX.R3.1HG0057590 HORVU.MOREX.R3.7HG0737470
0.0259675871131504	1	188	52.71698459281	Cell wall organization	http://amigo.geneontology.org/cgi-bin/amigo/term_details?term=GO:0071555	HORVU.MOREX.R3.1HG0041280
0.0261067173686781	1	190	52.1620689655172	Cellular oxidant detoxification	http://amigo.geneontology.org/cgi-bin/amigo/term_details?term=GO:0098869	HORVU.MOREX.R3.7HG0737470
0.00157250567758939	3	934	31.8333825592557	Cellular catabolic process	http://amigo.geneontology.org/cgi-bin/amigo/term_details?term=GO:0044248	HORVU.MOREX.R3.1HG0073500 HORVU.MOREX.R3.3HG0302570 HORVU.MOREX.R3.7HG0737470
0.00164179071207574	3	974	30.5260567868017	Carbohydrate metabolic process	http://amigo.geneontology.org/cgi-bin/amigo/term_details?term=GO:0005975	HORVU.MOREX.R3.1HG0041280 HORVU.MOREX.R3.3HG0288960 HORVU.MOREX.R3.4HG0402760
0.0383575884943035	1	333	29.7621414517966	Translation	http://amigo.geneontology.org/cgi-bin/amigo/term_details?term=GO:0006412	HORVU.MOREX.R3.4HG0332030
0.000587816013207345	4	1583	25.0430653277278	Cellular component organization or biogenesis	http://amigo.geneontology.org/cgi-bin/amigo/term_details?term=GO:0071840	HORVU.MOREX.R3.5HG0520550 HORVU.MOREX.R3.1HG0041280 HORVU.MOREX.R3.3HG0288960 HORVU.MOREX.R3.7HG0680970
0.00900689193944926	2	921	21.5218091280093	Organelle organization	http://amigo.geneontology.org/cgi-bin/amigo/term_details?term=GO:0006996	HORVU.MOREX.R3.5HG0520550 HORVU.MOREX.R3.7HG0680970
0.00326207528890157	3	1388	21.4210225578853	Cellular component organization	http://amigo.geneontology.org/cgi-bin/amigo/term_details?term=GO:0016043	HORVU.MOREX.R3.5HG0520550 HORVU.MOREX.R3.1HG0041280 HORVU.MOREX.R3.7HG0680970
0.00971400522476178	2	988	20.0623342175066	Proteolysis	http://amigo.geneontology.org/cgi-bin/amigo/term_details?term=GO:0006508	HORVU.MOREX.R3.3HG0274060 HORVU.MOREX.R3.6HG0620630
0.0107196885907419	2	1093	18.1350285515979	Organonitrogen compound biosynthetic process	http://amigo.geneontology.org/cgi-bin/amigo/term_details?term=GO:1901566	HORVU.MOREX.R3.1HG0057590 HORVU.MOREX.R3.4HG0332030
0.00467838885312072	3	1820	16.3364721485411	Regulation of nucleobase-containing compound metabolic process	http://amigo.geneontology.org/cgi-bin/amigo/term_details?term=GO:0019219	HORVU.MOREX.R3.3HG0279110 HORVU.MOREX.R3.7HG0680970 HORVU.MOREX.R3.5HG0520550
0.00474199554698462	3	1947	15.2708676478402	Response to stress	http://amigo.geneontology.org/cgi-bin/amigo/term_details?term=GO:0006950	HORVU.MOREX.R3.1HG0057590 HORVU.MOREX.R3.6HG0632840 HORVU.MOREX.R3.7HG0737470
0.00475852442859136	3	1971	15.0849210098147	Phosphorylation	http://amigo.geneontology.org/cgi-bin/amigo/term_details?term=GO:0016310	HORVU.MOREX.R3.1HG0012160 HORVU.MOREX.R3.1HG0057590 HORVU.MOREX.R3.5HG0520550
0.0191202434630999	2	1639	12.0937072647325	Protein phosphorylation	http://amigo.geneontology.org/cgi-bin/amigo/term_details?term=GO:0006468	HORVU.MOREX.R3.1HG0012160 HORVU.MOREX.R3.5HG0520550
0.0213977810974553	2	1772	11.1859967307543	Regulation of transcription, DNA-templated	http://amigo.geneontology.org/cgi-bin/amigo/term_details?term=GO:0006355	HORVU.MOREX.R3.3HG0279110 HORVU.MOREX.R3.7HG0680970

## Sheet: GandP
GO enrichment analysis results for pairwise comparisons of γ- and protons exposures
Enrichment FDR	nGenes	Pathway Genes	Fold Enrichment	Pathway	URL	Genes
0.00604853517203727	1	9	840.388888888889	Transferase activity, transferring aldehyde or ketonic groups	http://amigo.geneontology.org/cgi-bin/amigo/term_details?term=GO:0016744	HORVU.MOREX.R3.6HG0587290
0.00649763056802318	1	11	687.590909090909	Single-stranded RNA binding	http://amigo.geneontology.org/cgi-bin/amigo/term_details?term=GO:0003727	HORVU.MOREX.R3.7HG0680970
0.000151107581236115	2	30	504.233333333333	Cellulose synthase activity	http://amigo.geneontology.org/cgi-bin/amigo/term_details?term=GO:0016759	HORVU.MOREX.R3.1HG0041280 HORVU.MOREX.R3.3HG0288960
0.00892316624644036	1	16	472.71875	Protein folding chaperone	http://amigo.geneontology.org/cgi-bin/amigo/term_details?term=GO:0044183	HORVU.MOREX.R3.5HG0496010
0.000151107581236115	2	38	398.078947368421	Oxidoreductase activity, acting on diphenols and related substances as donors	http://amigo.geneontology.org/cgi-bin/amigo/term_details?term=GO:0016679	HORVU.MOREX.R3.1HG0073500 HORVU.MOREX.R3.3HG0302570
0.0105641878559588	1	20	378.175	Pseudouridine synthase activity	http://amigo.geneontology.org/cgi-bin/amigo/term_details?term=GO:0009982	HORVU.MOREX.R3.2HG0116520
0.0115146378293031	1	23	328.847826086957	Beta-galactosidase activity	http://amigo.geneontology.org/cgi-bin/amigo/term_details?term=GO:0004565	HORVU.MOREX.R3.4HG0402760
0.0115146378293031	1	29	260.810344827586	Phosphotransferase activity, phosphate group as acceptor	http://amigo.geneontology.org/cgi-bin/amigo/term_details?term=GO:0016776	HORVU.MOREX.R3.1HG0057590
0.015280676318784	1	58	130.405172413793	Structural constituent of ribosome	http://amigo.geneontology.org/cgi-bin/amigo/term_details?term=GO:0003735	HORVU.MOREX.R3.4HG0332030
0.0182533353045598	1	72	105.048611111111	Phospholipid binding	http://amigo.geneontology.org/cgi-bin/amigo/term_details?term=GO:0005543	HORVU.MOREX.R3.2HG0111570
0.0182533353045598	1	73	103.609589041096	Unfolded protein binding	http://amigo.geneontology.org/cgi-bin/amigo/term_details?term=GO:0051082	HORVU.MOREX.R3.5HG0488480
0.00237098284613176	2	203	74.5172413793103	Isomerase activity	http://amigo.geneontology.org/cgi-bin/amigo/term_details?term=GO:0016853	HORVU.MOREX.R3.5HG0496010 HORVU.MOREX.R3.2HG0116520
0.0250781478818684	1	103	73.4320388349515	Manganese ion binding	http://amigo.geneontology.org/cgi-bin/amigo/term_details?term=GO:0030145	HORVU.MOREX.R3.3HG0252270
0.0261330555561107	1	110	68.7590909090909	Microtubule binding	http://amigo.geneontology.org/cgi-bin/amigo/term_details?term=GO:0008017	HORVU.MOREX.R3.6HG0616070
0.0265911171427613	1	120	63.0291666666667	Aspartic-type endopeptidase activity	http://amigo.geneontology.org/cgi-bin/amigo/term_details?term=GO:0004190	HORVU.MOREX.R3.3HG0274060
0.0268417630147297	1	130	58.1807692307692	Serine-type endopeptidase activity	http://amigo.geneontology.org/cgi-bin/amigo/term_details?term=GO:0004252	HORVU.MOREX.R3.6HG0620630
0.00604853517203727	2	381	39.7034120734908	Endopeptidase activity	http://amigo.geneontology.org/cgi-bin/amigo/term_details?term=GO:0004175	HORVU.MOREX.R3.3HG0274060 HORVU.MOREX.R3.6HG0620630
0.0403924672906355	1	241	31.3838174273859	Peroxidase activity	http://amigo.geneontology.org/cgi-bin/amigo/term_details?term=GO:0004601	HORVU.MOREX.R3.7HG0737470
0.000151107581236115	4	991	30.5287588294652	Transition metal ion binding	http://amigo.geneontology.org/cgi-bin/amigo/term_details?term=GO:0046914	HORVU.MOREX.R3.1HG0073500 HORVU.MOREX.R3.2HG0119290 HORVU.MOREX.R3.3HG0252270 HORVU.MOREX.R3.3HG0302570
0.0115146378293031	2	665	22.7473684210526	ATPase activity	http://amigo.geneontology.org/cgi-bin/amigo/term_details?term=GO:0016887	HORVU.MOREX.R3.2HG0119860 HORVU.MOREX.R3.5HG0488480
0.000723878013790239	4	1750	17.288	Oxidoreductase activity	http://amigo.geneontology.org/cgi-bin/amigo/term_details?term=GO:0016491	HORVU.MOREX.R3.1HG0073500 HORVU.MOREX.R3.3HG0302570 HORVU.MOREX.R3.7HG0737470 HORVU.MOREX.R3.2HG0172900
0.0144666036407484	2	913	16.5684556407448	RNA binding	http://amigo.geneontology.org/cgi-bin/amigo/term_details?term=GO:0003723	HORVU.MOREX.R3.2HG0116520 HORVU.MOREX.R3.7HG0680970
0.0357078607743336	2	1809	8.36207849640685	Kinase activity	http://amigo.geneontology.org/cgi-bin/amigo/term_details?term=GO:0016301	HORVU.MOREX.R3.1HG0057590 HORVU.MOREX.R3.1HG0012160
Gandp	CC
Enrichment FDR	nGenes	Pathway Genes	Fold Enrichment	Pathway	URL	Genes
0.0155626661167223	1	23	328.847826086957	Nuclear chromatin	http://amigo.geneontology.org/cgi-bin/amigo/term_details?term=GO:0000790	HORVU.MOREX.R3.5HG0520550
4.08535770688396e-05	3	172	131.921511627907	Apoplast	http://amigo.geneontology.org/cgi-bin/amigo/term_details?term=GO:0048046	HORVU.MOREX.R3.1HG0073500 HORVU.MOREX.R3.3HG0252270 HORVU.MOREX.R3.3HG0302570
0.0271381251289614	1	62	121.991935483871	Ribosome	http://amigo.geneontology.org/cgi-bin/amigo/term_details?term=GO:0005840	HORVU.MOREX.R3.4HG0332030
4.51072016108257e-05	3	233	97.3841201716738	Cell wall	http://amigo.geneontology.org/cgi-bin/amigo/term_details?term=GO:0005618	HORVU.MOREX.R3.4HG0402760 HORVU.MOREX.R3.7HG0737470 HORVU.MOREX.R3.3HG0252270
0.0271381251289614	1	104	72.7259615384615	Microtubule	http://amigo.geneontology.org/cgi-bin/amigo/term_details?term=GO:0005874	HORVU.MOREX.R3.6HG0616070
0.0271381251289614	1	111	68.1396396396396	Cell-cell junction	http://amigo.geneontology.org/cgi-bin/amigo/term_details?term=GO:0005911	HORVU.MOREX.R3.7HG0737470
0.0271381251289614	1	111	68.1396396396396	Plastid stroma	http://amigo.geneontology.org/cgi-bin/amigo/term_details?term=GO:0009532	HORVU.MOREX.R3.5HG0488480
4.08535770688396e-05	4	667	45.3583208395802	Extracellular region	http://amigo.geneontology.org/cgi-bin/amigo/term_details?term=GO:0005576	HORVU.MOREX.R3.1HG0073500 HORVU.MOREX.R3.3HG0252270 HORVU.MOREX.R3.3HG0302570 HORVU.MOREX.R3.7HG0737470
0.039252344497803	1	198	38.1994949494949	Vacuole	http://amigo.geneontology.org/cgi-bin/amigo/term_details?term=GO:0005773	HORVU.MOREX.R3.4HG0402760
0.0423551576224545	1	233	32.4613733905579	Photosynthetic membrane	http://amigo.geneontology.org/cgi-bin/amigo/term_details?term=GO:0034357	HORVU.MOREX.R3.7HG0680970
0.000779093978526696	3	738	30.7459349593496	Non-membrane-bounded organelle	http://amigo.geneontology.org/cgi-bin/amigo/term_details?term=GO:0043228	HORVU.MOREX.R3.4HG0332030 HORVU.MOREX.R3.6HG0616070 HORVU.MOREX.R3.5HG0520550
0.000138481093141362	4	1150	26.3078260869565	Cell periphery	http://amigo.geneontology.org/cgi-bin/amigo/term_details?term=GO:0071944	HORVU.MOREX.R3.4HG0402760 HORVU.MOREX.R3.7HG0737470 HORVU.MOREX.R3.1HG0041280 HORVU.MOREX.R3.3HG0252270
GandP	Biopro
Enrichment FDR	nGenes	Pathway Genes	Fold Enrichment	Pathway	URL	Genes
0.0058710488890663	1	6	1260.58333333333	Positive regulation of histone modification	http://amigo.geneontology.org/cgi-bin/amigo/term_details?term=GO:0031058	HORVU.MOREX.R3.5HG0520550
0.0058710488890663	1	6	1260.58333333333	GTP metabolic process	http://amigo.geneontology.org/cgi-bin/amigo/term_details?term=GO:0046039	HORVU.MOREX.R3.1HG0057590
0.00650756026333669	1	9	840.388888888889	Regulation of photosynthesis, light reaction	http://amigo.geneontology.org/cgi-bin/amigo/term_details?term=GO:0042548	HORVU.MOREX.R3.6HG0587290
0.000434453800493443	2	24	630.291666666667	Phenylpropanoid catabolic process	http://amigo.geneontology.org/cgi-bin/amigo/term_details?term=GO:0046271	HORVU.MOREX.R3.1HG0073500 HORVU.MOREX.R3.3HG0302570
0.000434453800493443	2	29	521.620689655172	Plant-type secondary cell wall biogenesis	http://amigo.geneontology.org/cgi-bin/amigo/term_details?term=GO:0009834	HORVU.MOREX.R3.1HG0041280 HORVU.MOREX.R3.3HG0288960
0.00823552279093563	1	20	378.175	de novo protein folding	http://amigo.geneontology.org/cgi-bin/amigo/term_details?term=GO:0006458	HORVU.MOREX.R3.5HG0496010
0.00920261122265259	1	25	302.54	Pseudouridine synthesis	http://amigo.geneontology.org/cgi-bin/amigo/term_details?term=GO:0001522	HORVU.MOREX.R3.2HG0116520
0.0107509412590343	1	34	222.455882352941	DNA-templated transcription, termination	http://amigo.geneontology.org/cgi-bin/amigo/term_details?term=GO:0006353	HORVU.MOREX.R3.7HG0680970
0.000250450999918883	3	136	166.841911764706	Protein folding	http://amigo.geneontology.org/cgi-bin/amigo/term_details?term=GO:0006457	HORVU.MOREX.R3.5HG0488480 HORVU.MOREX.R3.5HG0496010 HORVU.MOREX.R3.2HG0119860
0.0182388095126915	1	76	99.5197368421053	DNA integration	http://amigo.geneontology.org/cgi-bin/amigo/term_details?term=GO:0015074	HORVU.MOREX.R3.2HG0119290
0.00395396855284336	2	218	69.3899082568807	Peptidyl-amino acid modification	http://amigo.geneontology.org/cgi-bin/amigo/term_details?term=GO:0018193	HORVU.MOREX.R3.5HG0496010 HORVU.MOREX.R3.5HG0520550
0.0058710488890663	2	307	49.2736156351791	Response to oxidative stress	http://amigo.geneontology.org/cgi-bin/amigo/term_details?term=GO:0006979	HORVU.MOREX.R3.1HG0057590 HORVU.MOREX.R3.7HG0737470
0.0350847718054113	1	188	40.2313829787234	Cell wall organization	http://amigo.geneontology.org/cgi-bin/amigo/term_details?term=GO:0071555	HORVU.MOREX.R3.1HG0041280
0.0352796744118954	1	190	39.8078947368421	Cellular oxidant detoxification	http://amigo.geneontology.org/cgi-bin/amigo/term_details?term=GO:0098869	HORVU.MOREX.R3.7HG0737470
0.000434453800493443	4	934	32.3918629550321	Cellular catabolic process	http://amigo.geneontology.org/cgi-bin/amigo/term_details?term=GO:0044248	HORVU.MOREX.R3.1HG0073500 HORVU.MOREX.R3.3HG0302570 HORVU.MOREX.R3.6HG0587290 HORVU.MOREX.R3.7HG0737470
0.00766150088263124	2	476	31.7794117647059	Small molecule biosynthetic process	http://amigo.geneontology.org/cgi-bin/amigo/term_details?term=GO:0044283	HORVU.MOREX.R3.1HG0057590 HORVU.MOREX.R3.6HG0587290
0.00294702180346617	3	894	25.3808724832215	Organic substance catabolic process	http://amigo.geneontology.org/cgi-bin/amigo/term_details?term=GO:1901575	HORVU.MOREX.R3.1HG0073500 HORVU.MOREX.R3.3HG0302570 HORVU.MOREX.R3.6HG0587290
0.00321766072533165	3	974	23.2962012320329	Carbohydrate metabolic process	http://amigo.geneontology.org/cgi-bin/amigo/term_details?term=GO:0005975	HORVU.MOREX.R3.1HG0041280 HORVU.MOREX.R3.3HG0288960 HORVU.MOREX.R3.4HG0402760
0.0012796344743075	4	1583	19.1118130132659	Cellular component organization or biogenesis	http://amigo.geneontology.org/cgi-bin/amigo/term_details?term=GO:0071840	HORVU.MOREX.R3.5HG0520550 HORVU.MOREX.R3.1HG0041280 HORVU.MOREX.R3.3HG0288960 HORVU.MOREX.R3.7HG0680970
0.0140379036574429	2	921	16.4245385450597	Organelle organization	http://amigo.geneontology.org/cgi-bin/amigo/term_details?term=GO:0006996	HORVU.MOREX.R3.5HG0520550 HORVU.MOREX.R3.7HG0680970
0.00591092147313656	3	1388	16.3476224783862	Cellular component organization	http://amigo.geneontology.org/cgi-bin/amigo/term_details?term=GO:0016043	HORVU.MOREX.R3.5HG0520550 HORVU.MOREX.R3.1HG0041280 HORVU.MOREX.R3.7HG0680970
0.0152907409748352	2	988	15.3107287449393	Proteolysis	http://amigo.geneontology.org/cgi-bin/amigo/term_details?term=GO:0006508	HORVU.MOREX.R3.3HG0274060 HORVU.MOREX.R3.6HG0620630
0.0179348396670558	2	1093	13.83989021043	Organonitrogen compound biosynthetic process	http://amigo.geneontology.org/cgi-bin/amigo/term_details?term=GO:1901566	HORVU.MOREX.R3.1HG0057590 HORVU.MOREX.R3.4HG0332030
0.00766150088263124	3	1820	12.4673076923077	Regulation of nucleobase-containing compound metabolic process	http://amigo.geneontology.org/cgi-bin/amigo/term_details?term=GO:0019219	HORVU.MOREX.R3.3HG0279110 HORVU.MOREX.R3.7HG0680970 HORVU.MOREX.R3.5HG0520550
0.00784039081922312	3	1947	11.6540832049307	Response to stress	http://amigo.geneontology.org/cgi-bin/amigo/term_details?term=GO:0006950	HORVU.MOREX.R3.1HG0057590 HORVU.MOREX.R3.6HG0632840 HORVU.MOREX.R3.7HG0737470
0.00784039081922312	3	1971	11.5121765601218	Phosphorylation	http://amigo.geneontology.org/cgi-bin/amigo/term_details?term=GO:0016310	HORVU.MOREX.R3.1HG0012160 HORVU.MOREX.R3.1HG0057590 HORVU.MOREX.R3.5HG0520550
0.030443900372608	2	1639	9.2294081757169	Protein phosphorylation	http://amigo.geneontology.org/cgi-bin/amigo/term_details?term=GO:0006468	HORVU.MOREX.R3.1HG0012160 HORVU.MOREX.R3.5HG0520550
0.0336072589134162	2	1772	8.53668171557562	Regulation of transcription, DNA-templated	http://amigo.geneontology.org/cgi-bin/amigo/term_details?term=GO:0006355	HORVU.MOREX.R3.3HG0279110 HORVU.MOREX.R3.7HG0680970
DOWN	MF
Enrichment FDR	nGenes	Pathway Genes	Fold Enrichment	Pathway	URL	Genes
0.00159691610426771	1	17	5635.54901960784	Carbon-sulfur lyase activity	http://amigo.geneontology.org/cgi-bin/amigo/term_details?term=GO:0016846	HORVU.MOREX.R3.3HG0285150
0.00314558320742997	1	134	714.957711442786	Monooxygenase activity	http://amigo.geneontology.org/cgi-bin/amigo/term_details?term=GO:0004497	HORVU.MOREX.R3.1HG0094920

## Sheet: GandE
GO enrichment analysis results for pairwise comparisons of γ- and electrons exposures
Enrichment FDR	nGenes	Pathway Genes	Fold Enrichment	Pathway	URL	Genes
0.0045284512277616	1	6	1140.52777777778	Phenylalanine ammonia-lyase activity	http://amigo.geneontology.org/cgi-bin/amigo/term_details?term=GO:0045548	HORVU.MOREX.R3.6HG0596580
0.0058210488388724	1	9	760.351851851852	Pyruvate kinase activity	http://amigo.geneontology.org/cgi-bin/amigo/term_details?term=GO:0004743	HORVU.MOREX.R3.3HG0277200
5.46215568278735e-07	3	30	684.316666666667	Cellulose synthase activity	http://amigo.geneontology.org/cgi-bin/amigo/term_details?term=GO:0016759	HORVU.MOREX.R3.1HG0041280 HORVU.MOREX.R3.3HG0288960 HORVU.MOREX.R3.5HG0482670
0.00590499072736068	1	10	684.316666666667	Triglyceride lipase activity	http://amigo.geneontology.org/cgi-bin/amigo/term_details?term=GO:0004806	HORVU.MOREX.R3.3HG0233200
0.00617113210892008	1	11	622.106060606061	Single-stranded RNA binding	http://amigo.geneontology.org/cgi-bin/amigo/term_details?term=GO:0003727	HORVU.MOREX.R3.7HG0680970
0.00010679659945271	2	24	570.263888888889	Hydroquinone:oxygen oxidoreductase activity	http://amigo.geneontology.org/cgi-bin/amigo/term_details?term=GO:0052716	HORVU.MOREX.R3.1HG0073500 HORVU.MOREX.R3.3HG0302570
0.0076309581095339	1	16	427.697916666667	Protein folding chaperone	http://amigo.geneontology.org/cgi-bin/amigo/term_details?term=GO:0044183	HORVU.MOREX.R3.5HG0496010
0.00904786495750952	1	20	342.158333333333	Pseudouridine synthase activity	http://amigo.geneontology.org/cgi-bin/amigo/term_details?term=GO:0009982	HORVU.MOREX.R3.2HG0116520
0.00975264314917931	1	23	297.528985507246	Beta-galactosidase activity	http://amigo.geneontology.org/cgi-bin/amigo/term_details?term=GO:0004565	HORVU.MOREX.R3.4HG0402760
0.0113458331454361	1	29	235.971264367816	Phosphotransferase activity, phosphate group as acceptor	http://amigo.geneontology.org/cgi-bin/amigo/term_details?term=GO:0016776	HORVU.MOREX.R3.1HG0057590
0.000776690021376455	2	99	138.245791245791	Pyridoxal phosphate binding	http://amigo.geneontology.org/cgi-bin/amigo/term_details?term=GO:0030170	HORVU.MOREX.R3.3HG0287560 HORVU.MOREX.R3.3HG0305100
0.0163549010595014	1	58	117.985632183908	Structural constituent of ribosome	http://amigo.geneontology.org/cgi-bin/amigo/term_details?term=GO:0003735	HORVU.MOREX.R3.4HG0332030
0.0198684727543683	1	72	95.0439814814815	Phospholipid binding	http://amigo.geneontology.org/cgi-bin/amigo/term_details?term=GO:0005543	HORVU.MOREX.R3.2HG0111570
0.00232158105461491	2	203	67.4203612479475	Isomerase activity	http://amigo.geneontology.org/cgi-bin/amigo/term_details?term=GO:0016853	HORVU.MOREX.R3.5HG0496010 HORVU.MOREX.R3.2HG0116520
0.0272481224658641	1	103	66.4385113268608	Manganese ion binding	http://amigo.geneontology.org/cgi-bin/amigo/term_details?term=GO:0030145	HORVU.MOREX.R3.3HG0252270
0.0287833878052497	1	111	61.6501501501501	ABC-type transmembrane transporter activity	http://amigo.geneontology.org/cgi-bin/amigo/term_details?term=GO:0140359	HORVU.MOREX.R3.3HG0282510
0.0288760228206773	1	120	57.0263888888889	Aspartic-type endopeptidase activity	http://amigo.geneontology.org/cgi-bin/amigo/term_details?term=GO:0004190	HORVU.MOREX.R3.3HG0274060
0.029896723456857	1	130	52.6397435897436	Serine-type endopeptidase activity	http://amigo.geneontology.org/cgi-bin/amigo/term_details?term=GO:0004252	HORVU.MOREX.R3.6HG0620630
0.029896723456857	1	131	52.2379134860051	Carboxy-lyase activity	http://amigo.geneontology.org/cgi-bin/amigo/term_details?term=GO:0016831	HORVU.MOREX.R3.3HG0305100
0.00590499072736068	2	381	35.9221347331584	Endopeptidase activity	http://amigo.geneontology.org/cgi-bin/amigo/term_details?term=GO:0004175	HORVU.MOREX.R3.3HG0274060 HORVU.MOREX.R3.6HG0620630
0.00617113210892008	2	407	33.6273546273546	Lyase activity	http://amigo.geneontology.org/cgi-bin/amigo/term_details?term=GO:0016829	HORVU.MOREX.R3.3HG0305100 HORVU.MOREX.R3.6HG0596580
0.0401344386503516	1	220	31.105303030303	Nucleoside binding	http://amigo.geneontology.org/cgi-bin/amigo/term_details?term=GO:0001882	HORVU.MOREX.R3.5HG0420420
0.0419525617170805	1	241	28.3948824343015	Peroxidase activity	http://amigo.geneontology.org/cgi-bin/amigo/term_details?term=GO:0004601	HORVU.MOREX.R3.7HG0737470
0.00207326387584671	3	913	22.4857612267251	RNA binding	http://amigo.geneontology.org/cgi-bin/amigo/term_details?term=GO:0003723	HORVU.MOREX.R3.2HG0116520 HORVU.MOREX.R3.3HG0305180 HORVU.MOREX.R3.7HG0680970
0.00232158105461491	3	991	20.7159434914228	Transition metal ion binding	http://amigo.geneontology.org/cgi-bin/amigo/term_details?term=GO:0046914	HORVU.MOREX.R3.1HG0073500 HORVU.MOREX.R3.3HG0252270 HORVU.MOREX.R3.3HG0302570
0.0113458331454361	2	665	20.5809523809524	ATPase activity	http://amigo.geneontology.org/cgi-bin/amigo/term_details?term=GO:0016887	HORVU.MOREX.R3.2HG0119860 HORVU.MOREX.R3.3HG0282510
0.00754257607326138	3	1750	11.7311428571429	Oxidoreductase activity	http://amigo.geneontology.org/cgi-bin/amigo/term_details?term=GO:0016491	HORVU.MOREX.R3.1HG0073500 HORVU.MOREX.R3.3HG0302570 HORVU.MOREX.R3.7HG0737470
0.0076309581095339	3	1809	11.3485351022664	Kinase activity	http://amigo.geneontology.org/cgi-bin/amigo/term_details?term=GO:0016301	HORVU.MOREX.R3.1HG0057590 HORVU.MOREX.R3.1HG0012160 HORVU.MOREX.R3.3HG0277200
0.0401344386503516	2	1742	7.85667814772292	Phosphotransferase activity, alcohol group as acceptor	http://amigo.geneontology.org/cgi-bin/amigo/term_details?term=GO:0016773	HORVU.MOREX.R3.1HG0012160 HORVU.MOREX.R3.3HG0277200
GandE	CelCom
Enrichment FDR	nGenes	Pathway Genes	Fold Enrichment	Pathway	URL	Genes
0.0058427461487609	1	7	977.595238095238	Plastid-encoded plastid RNA polymerase complex	http://amigo.geneontology.org/cgi-bin/amigo/term_details?term=GO:0000427	HORVU.MOREX.R3.3HG0305180
0.0149144363571679	1	23	297.528985507246	Nuclear chromatin	http://amigo.geneontology.org/cgi-bin/amigo/term_details?term=GO:0000790	HORVU.MOREX.R3.5HG0520550
3.99959959935346e-05	3	172	119.357558139535	Apoplast	http://amigo.geneontology.org/cgi-bin/amigo/term_details?term=GO:0048046	HORVU.MOREX.R3.1HG0073500 HORVU.MOREX.R3.3HG0252270 HORVU.MOREX.R3.3HG0302570
0.0240555274094601	1	62	110.373655913978	Ribosome	http://amigo.geneontology.org/cgi-bin/amigo/term_details?term=GO:0005840	HORVU.MOREX.R3.4HG0332030
0.0242270803921239	1	68	100.634803921569	Plant-type cell wall	http://amigo.geneontology.org/cgi-bin/amigo/term_details?term=GO:0009505	HORVU.MOREX.R3.7HG0737470
4.77937686343235e-05	3	233	88.1094420600858	Cell wall	http://amigo.geneontology.org/cgi-bin/amigo/term_details?term=GO:0005618	HORVU.MOREX.R3.4HG0402760 HORVU.MOREX.R3.7HG0737470 HORVU.MOREX.R3.3HG0252270
0.024908009683358	1	111	61.6501501501501	Plastid stroma	http://amigo.geneontology.org/cgi-bin/amigo/term_details?term=GO:0009532	HORVU.MOREX.R3.3HG0277200
0.0047797191651699	2	266	51.4523809523809	Transferase complex	http://amigo.geneontology.org/cgi-bin/amigo/term_details?term=GO:1990234	HORVU.MOREX.R3.3HG0305180 HORVU.MOREX.R3.5HG0482670
3.99959959935346e-05	4	667	41.0384807596202	Extracellular region	http://amigo.geneontology.org/cgi-bin/amigo/term_details?term=GO:0005576	HORVU.MOREX.R3.1HG0073500 HORVU.MOREX.R3.3HG0252270 HORVU.MOREX.R3.3HG0302570 HORVU.MOREX.R3.7HG0737470
0.0393532230815137	1	198	34.5614478114478	Vacuole	http://amigo.geneontology.org/cgi-bin/amigo/term_details?term=GO:0005773	HORVU.MOREX.R3.4HG0402760
3.05959948031818e-05	5	1150	29.7528985507246	Cell periphery	http://amigo.geneontology.org/cgi-bin/amigo/term_details?term=GO:0071944	HORVU.MOREX.R3.4HG0402760 HORVU.MOREX.R3.7HG0737470 HORVU.MOREX.R3.1HG0041280 HORVU.MOREX.R3.3HG0252270 HORVU.MOREX.R3.5HG0482670
0.0427471091688537	1	233	29.3698140200286	Photosynthetic membrane	http://amigo.geneontology.org/cgi-bin/amigo/term_details?term=GO:0034357	HORVU.MOREX.R3.7HG0680970
0.0192585469118896	2	738	18.5451671183378	Non-membrane-bounded organelle	http://amigo.geneontology.org/cgi-bin/amigo/term_details?term=GO:0043228	HORVU.MOREX.R3.4HG0332030 HORVU.MOREX.R3.5HG0520550
0.0219836092022688	2	862	15.8774168600155	Plasma membrane	http://amigo.geneontology.org/cgi-bin/amigo/term_details?term=GO:0005886	HORVU.MOREX.R3.1HG0041280 HORVU.MOREX.R3.5HG0482670
0.0239564173331442	2	937	14.6065457132693	Plastid	http://amigo.geneontology.org/cgi-bin/amigo/term_details?term=GO:0009536	HORVU.MOREX.R3.3HG0277200 HORVU.MOREX.R3.3HG0305180
BioPro
Enrichment FDR	nGenes	Pathway Genes	Fold Enrichment	Pathway	URL	Genes
0.00497505474308671	1	6	1140.52777777778	Positive regulation of histone modification	http://amigo.geneontology.org/cgi-bin/amigo/term_details?term=GO:0031058	HORVU.MOREX.R3.5HG0520550
0.00497505474308671	1	6	1140.52777777778	GTP metabolic process	http://amigo.geneontology.org/cgi-bin/amigo/term_details?term=GO:0046039	HORVU.MOREX.R3.1HG0057590
0.00497505474308671	1	7	977.595238095238	Cinnamic acid biosynthetic process	http://amigo.geneontology.org/cgi-bin/amigo/term_details?term=GO:0009800	HORVU.MOREX.R3.6HG0596580
3.44679478445668e-06	3	29	707.913793103448	Plant-type secondary cell wall biogenesis	http://amigo.geneontology.org/cgi-bin/amigo/term_details?term=GO:0009834	HORVU.MOREX.R3.1HG0041280 HORVU.MOREX.R3.3HG0288960 HORVU.MOREX.R3.5HG0482670
7.7992140281325e-05	2	24	570.263888888889	Phenylpropanoid catabolic process	http://amigo.geneontology.org/cgi-bin/amigo/term_details?term=GO:0046271	HORVU.MOREX.R3.1HG0073500 HORVU.MOREX.R3.3HG0302570
0.0070959245604213	1	16	427.697916666667	Seed maturation	http://amigo.geneontology.org/cgi-bin/amigo/term_details?term=GO:0010431	HORVU.MOREX.R3.3HG0277200
0.00794899608904329	1	20	342.158333333333	de novo protein folding	http://amigo.geneontology.org/cgi-bin/amigo/term_details?term=GO:0006458	HORVU.MOREX.R3.5HG0496010
0.00887263083835548	1	25	273.726666666667	Pseudouridine synthesis	http://amigo.geneontology.org/cgi-bin/amigo/term_details?term=GO:0001522	HORVU.MOREX.R3.2HG0116520
0.000291262122988592	2	53	258.232704402516	Multicellular organismal reproductive process	http://amigo.geneontology.org/cgi-bin/amigo/term_details?term=GO:0048609	HORVU.MOREX.R3.3HG0277200 HORVU.MOREX.R3.5HG0520550
1.37111965006787e-05	3	86	238.71511627907	Phenylpropanoid metabolic process	http://amigo.geneontology.org/cgi-bin/amigo/term_details?term=GO:0009698	HORVU.MOREX.R3.1HG0073500 HORVU.MOREX.R3.3HG0302570 HORVU.MOREX.R3.6HG0596580
0.0102924279412163	1	34	201.269607843137	DNA-templated transcription, termination	http://amigo.geneontology.org/cgi-bin/amigo/term_details?term=GO:0006353	HORVU.MOREX.R3.7HG0680970
0.000454147366264642	2	71	192.765258215962	Nucleoside diphosphate phosphorylation	http://amigo.geneontology.org/cgi-bin/amigo/term_details?term=GO:0006165	HORVU.MOREX.R3.1HG0057590 HORVU.MOREX.R3.3HG0277200
0.0116580317295718	1	40	171.079166666667	Galacturonan metabolic process	http://amigo.geneontology.org/cgi-bin/amigo/term_details?term=GO:0010393	HORVU.MOREX.R3.5HG0482670
0.00140033814476467	2	136	100.634803921569	Protein folding	http://amigo.geneontology.org/cgi-bin/amigo/term_details?term=GO:0006457	HORVU.MOREX.R3.5HG0496010 HORVU.MOREX.R3.2HG0119860
0.00219106942635518	2	176	77.7632575757576	Monocarboxylic acid biosynthetic process	http://amigo.geneontology.org/cgi-bin/amigo/term_details?term=GO:0072330	HORVU.MOREX.R3.3HG0277200 HORVU.MOREX.R3.6HG0596580
0.00244612542076329	2	188	72.7996453900709	Cell wall organization	http://amigo.geneontology.org/cgi-bin/amigo/term_details?term=GO:0071555	HORVU.MOREX.R3.1HG0041280 HORVU.MOREX.R3.5HG0482670
0.00315108422206718	2	218	62.7813455657492	Peptidyl-amino acid modification	http://amigo.geneontology.org/cgi-bin/amigo/term_details?term=GO:0018193	HORVU.MOREX.R3.5HG0496010 HORVU.MOREX.R3.5HG0520550
0.00497505474308671	2	307	44.5808903365907	Response to oxidative stress	http://amigo.geneontology.org/cgi-bin/amigo/term_details?term=GO:0006979	HORVU.MOREX.R3.1HG0057590 HORVU.MOREX.R3.7HG0737470
0.000454147366264642	3	476	43.1292016806723	Small molecule biosynthetic process	http://amigo.geneontology.org/cgi-bin/amigo/term_details?term=GO:0044283	HORVU.MOREX.R3.1HG0057590 HORVU.MOREX.R3.3HG0277200 HORVU.MOREX.R3.6HG0596580
0.0054936449339565	2	356	38.4447565543071	Cellular amino acid metabolic process	http://amigo.geneontology.org/cgi-bin/amigo/term_details?term=GO:0006520	HORVU.MOREX.R3.3HG0305100 HORVU.MOREX.R3.6HG0596580
0.0356086805395552	1	194	35.2740549828179	Cellular response to toxic substance	http://amigo.geneontology.org/cgi-bin/amigo/term_details?term=GO:0097237	HORVU.MOREX.R3.7HG0737470
1.3821424262919e-05	5	974	35.1291923340178	Carbohydrate metabolic process	http://amigo.geneontology.org/cgi-bin/amigo/term_details?term=GO:0005975	HORVU.MOREX.R3.1HG0041280 HORVU.MOREX.R3.3HG0277200 HORVU.MOREX.R3.3HG0288960 HORVU.MOREX.R3.4HG0402760 HORVU.MOREX.R3.5HG0482670
0.000118781370037856	4	894	30.6181953765846	Organic substance catabolic process	http://amigo.geneontology.org/cgi-bin/amigo/term_details?term=GO:1901575	HORVU.MOREX.R3.1HG0073500 HORVU.MOREX.R3.3HG0277200 HORVU.MOREX.R3.3HG0302570 HORVU.MOREX.R3.6HG0596580
2.07165722515308e-05	5	1129	30.3063182757603	Catabolic process	http://amigo.geneontology.org/cgi-bin/amigo/term_details?term=GO:0009056	HORVU.MOREX.R3.1HG0073500 HORVU.MOREX.R3.3HG0277200 HORVU.MOREX.R3.3HG0302570 HORVU.MOREX.R3.6HG0596580 HORVU.MOREX.R3.7HG0737470
0.00013088542964547	4	934	29.3069236259814	Cellular catabolic process	http://amigo.geneontology.org/cgi-bin/amigo/term_details?term=GO:0044248	HORVU.MOREX.R3.1HG0073500 HORVU.MOREX.R3.3HG0302570 HORVU.MOREX.R3.6HG0596580 HORVU.MOREX.R3.7HG0737470
0.00140033814476467	3	735	27.9312925170068	Carboxylic acid metabolic process	http://amigo.geneontology.org/cgi-bin/amigo/term_details?term=GO:0019752	HORVU.MOREX.R3.3HG0277200 HORVU.MOREX.R3.3HG0305100 HORVU.MOREX.R3.6HG0596580
0.00144150433653683	3	770	26.6616883116883	Lipid metabolic process	http://amigo.geneontology.org/cgi-bin/amigo/term_details?term=GO:0006629	HORVU.MOREX.R3.3HG0233200 HORVU.MOREX.R3.3HG0274060 HORVU.MOREX.R3.3HG0277200
5.61542370980038e-05	5	1583	21.6145504316698	Cellular component organization or biogenesis	http://amigo.geneontology.org/cgi-bin/amigo/term_details?term=GO:0071840	HORVU.MOREX.R3.5HG0520550 HORVU.MOREX.R3.1HG0041280 HORVU.MOREX.R3.3HG0288960 HORVU.MOREX.R3.5HG0482670 HORVU.MOREX.R3.7HG0680970
0.000358405039405123	4	1272	21.519392033543	Small molecule metabolic process	http://amigo.geneontology.org/cgi-bin/amigo/term_details?term=GO:0044281	HORVU.MOREX.R3.1HG0057590 HORVU.MOREX.R3.3HG0277200 HORVU.MOREX.R3.3HG0305100 HORVU.MOREX.R3.6HG0596580
0.000454147366264642	4	1388	19.7209414024976	Cellular component organization	http://amigo.geneontology.org/cgi-bin/amigo/term_details?term=GO:0016043	HORVU.MOREX.R3.5HG0520550 HORVU.MOREX.R3.1HG0041280 HORVU.MOREX.R3.5HG0482670 HORVU.MOREX.R3.7HG0680970
0.0144519924089632	2	921	14.8602967788636	Organelle organization	http://amigo.geneontology.org/cgi-bin/amigo/term_details?term=GO:0006996	HORVU.MOREX.R3.5HG0520550 HORVU.MOREX.R3.7HG0680970
0.00144150433653683	4	1971	13.8877050566548	Phosphorylation	http://amigo.geneontology.org/cgi-bin/amigo/term_details?term=GO:0016310	HORVU.MOREX.R3.1HG0012160 HORVU.MOREX.R3.1HG0057590 HORVU.MOREX.R3.3HG0277200 HORVU.MOREX.R3.5HG0520550
0.0162635802783683	2	988	13.8525641025641	Proteolysis	http://amigo.geneontology.org/cgi-bin/amigo/term_details?term=GO:0006508	HORVU.MOREX.R3.3HG0274060 HORVU.MOREX.R3.6HG0620630
0.0178008072496523	2	1093	12.5218054284843	Organonitrogen compound biosynthetic process	http://amigo.geneontology.org/cgi-bin/amigo/term_details?term=GO:1901566	HORVU.MOREX.R3.1HG0057590 HORVU.MOREX.R3.4HG0332030
0.0070959245604213	3	1820	11.2799450549451	Regulation of nucleobase-containing compound metabolic process	http://amigo.geneontology.org/cgi-bin/amigo/term_details?term=GO:0019219	HORVU.MOREX.R3.3HG0279110 HORVU.MOREX.R3.7HG0680970 HORVU.MOREX.R3.5HG0520550
0.00794899608904329	3	1947	10.5441705187468	Response to stress	http://amigo.geneontology.org/cgi-bin/amigo/term_details?term=GO:0006950	HORVU.MOREX.R3.1HG0057590 HORVU.MOREX.R3.6HG0632840 HORVU.MOREX.R3.7HG0737470
0.0318930960456275	2	1639	8.35041692088672	Protein phosphorylation	http://amigo.geneontology.org/cgi-bin/amigo/term_details?term=GO:0006468	HORVU.MOREX.R3.1HG0012160 HORVU.MOREX.R3.5HG0520550
0.0356086805395552	2	1772	7.72366440933032	Regulation of transcription, DNA-templated	http://amigo.geneontology.org/cgi-bin/amigo/term_details?term=GO:0006355	HORVU.MOREX.R3.3HG0279110 HORVU.MOREX.R3.7HG0680970
Down
MF
Enrichment FDR	nGenes	Pathway Genes	Fold Enrichment	Pathway	URL	Genes
2.4923629844219e-06	2	172	1671.00581395349	Polysaccharide binding	http://amigo.geneontology.org/cgi-bin/amigo/term_details?term=GO:0030247	HORVU.MOREX.R3.6HG0539130 HORVU.MOREX.R3.6HG0545390
BioP
Enrichment FDR	nGenes	Pathway Genes	Fold Enrichment	Pathway	URL	Genes
4.70047282028825e-05	2	1639	175.358755338621	Protein phosphorylation	http://amigo.geneontology.org/cgi-bin/amigo/term_details?term=GO:0006468	HORVU.MOREX.R3.6HG0539130 HORVU.MOREX.R3.6HG0545390
4.70047282028825e-05	2	1971	145.820903094876	Phosphorylation	http://amigo.geneontology.org/cgi-bin/amigo/term_details?term=GO:0016310	HORVU.MOREX.R3.6HG0539130 HORVU.MOREX.R3.6HG0545390

## Sheet: PandE
GO enrichment analysis results for pairwise comparisons of protons and electrons exposures
Enrichment FDR	nGenes	Pathway Genes	Fold Enrichment	Pathway	URL	Genes
3.41703256871314e-07	3	15	449.0828125	Modified amino acid binding	http://amigo.geneontology.org/cgi-bin/amigo/term_details?term=GO:0072341	HORVU.MOREX.R3.1HG0055010 HORVU.MOREX.R3.3HG0313690 HORVU.MOREX.R3.5HG0500680
5.22295858151293e-05	2	10	449.0828125	Glutathione binding	http://amigo.geneontology.org/cgi-bin/amigo/term_details?term=GO:0043295	HORVU.MOREX.R3.1HG0055010 HORVU.MOREX.R3.3HG0313690
1.9759904287598e-24	11	58	425.854391163793	Structural constituent of ribosome	http://amigo.geneontology.org/cgi-bin/amigo/term_details?term=GO:0003735	HORVU.MOREX.R3.2HG0112820 HORVU.MOREX.R3.4HG0378160 HORVU.MOREX.R3.6HG0628850 HORVU.MOREX.R3.1HG0026070 HORVU.MOREX.R3.1HG0087990 HORVU.MOREX.R3.2HG0194250 HORVU.MOREX.R3.4HG0332030 HORVU.MOREX.R3.4HG0349380 HORVU.MOREX.R3.5HG0455100 HORVU.MOREX.R3.5HG0466770 HORVU.MOREX.R3.7HG0689220
0.00812881407825543	1	6	374.235677083333	Ferrous iron binding	http://amigo.geneontology.org/cgi-bin/amigo/term_details?term=GO:0008198	HORVU.MOREX.R3.6HG0540880
8.61040428918098e-09	4	25	359.26625	Translation elongation factor activity	http://amigo.geneontology.org/cgi-bin/amigo/term_details?term=GO:0003746	HORVU.MOREX.R3.2HG0107850 HORVU.MOREX.R3.7HG0735200 HORVU.MOREX.R3.2HG0116210 HORVU.MOREX.R3.4HG0385270
1.39431621337628e-06	3	24	280.6767578125	Hydroquinone:oxygen oxidoreductase activity	http://amigo.geneontology.org/cgi-bin/amigo/term_details?term=GO:0052716	HORVU.MOREX.R3.1HG0073500 HORVU.MOREX.R3.2HG0158150 HORVU.MOREX.R3.3HG0302570
0.0105149957252205	1	8	280.6767578125	Xylan 1,4-beta-xylosidase activity	http://amigo.geneontology.org/cgi-bin/amigo/term_details?term=GO:0009044	HORVU.MOREX.R3.2HG0206500
0.0106507136806029	1	9	249.490451388889	DNA topoisomerase type II (double strand cut, ATP-hydrolyzing) activity	http://amigo.geneontology.org/cgi-bin/amigo/term_details?term=GO:0003918	HORVU.MOREX.R3.3HG0256040
0.0106507136806029	1	9	249.490451388889	Pyruvate dehydrogenase activity	http://amigo.geneontology.org/cgi-bin/amigo/term_details?term=GO:0004738	HORVU.MOREX.R3.5HG0508190
0.0106507136806029	1	9	249.490451388889	Tripeptide transmembrane transporter activity	http://amigo.geneontology.org/cgi-bin/amigo/term_details?term=GO:0042937	HORVU.MOREX.R3.1HG0041600
0.0119817191640353	1	11	204.128551136364	Single-stranded RNA binding	http://amigo.geneontology.org/cgi-bin/amigo/term_details?term=GO:0003727	HORVU.MOREX.R3.7HG0680970
0.000248653160577037	2	23	195.25339673913	Beta-galactosidase activity	http://amigo.geneontology.org/cgi-bin/amigo/term_details?term=GO:0004565	HORVU.MOREX.R3.4HG0402760 HORVU.MOREX.R3.4HG0336280
0.0126068541859011	1	12	187.117838541667	RRNA methyltransferase activity	http://amigo.geneontology.org/cgi-bin/amigo/term_details?term=GO:0008649	HORVU.MOREX.R3.5HG0488940
0.0126068541859011	1	12	187.117838541667	Acid-amino acid ligase activity	http://amigo.geneontology.org/cgi-bin/amigo/term_details?term=GO:0016881	HORVU.MOREX.R3.1HG0055820
0.0127541195137751	1	13	172.724158653846	Acyl carrier activity	http://amigo.geneontology.org/cgi-bin/amigo/term_details?term=GO:0000036	HORVU.MOREX.R3.5HG0500680
0.0127541195137751	1	13	172.724158653846	Aminoacyl-tRNA editing activity	http://amigo.geneontology.org/cgi-bin/amigo/term_details?term=GO:0002161	HORVU.MOREX.R3.2HG0149510
0.0127541195137751	1	13	172.724158653846	Beta-mannosidase activity	http://amigo.geneontology.org/cgi-bin/amigo/term_details?term=GO:0004567	HORVU.MOREX.R3.4HG0336280
6.34047898844979e-06	3	42	160.38671875	RNA methyltransferase activity	http://amigo.geneontology.org/cgi-bin/amigo/term_details?term=GO:0008173	HORVU.MOREX.R3.3HG0310400 HORVU.MOREX.R3.3HG0329300 HORVU.MOREX.R3.5HG0488940
0.00037100261623581	2	30	149.694270833333	Cellulose synthase activity	http://amigo.geneontology.org/cgi-bin/amigo/term_details?term=GO:0016759	HORVU.MOREX.R3.1HG0041280 HORVU.MOREX.R3.3HG0288960
0.0148699549141481	1	16	140.33837890625	Anion:anion antiporter activity	http://amigo.geneontology.org/cgi-bin/amigo/term_details?term=GO:0015301	HORVU.MOREX.R3.5HG0471790
0.0148699549141481	1	16	140.33837890625	Protein folding chaperone	http://amigo.geneontology.org/cgi-bin/amigo/term_details?term=GO:0044183	HORVU.MOREX.R3.5HG0496010
2.8978446803842e-07	4	69	130.16893115942	Copper ion binding	http://amigo.geneontology.org/cgi-bin/amigo/term_details?term=GO:0005507	HORVU.MOREX.R3.1HG0073500 HORVU.MOREX.R3.2HG0158150 HORVU.MOREX.R3.3HG0302570 HORVU.MOREX.R3.5HG0480620
0.0164471146505591	1	19	118.1796875	DNA-directed DNA polymerase activity	http://amigo.geneontology.org/cgi-bin/amigo/term_details?term=GO:0003887	HORVU.MOREX.R3.3HG0298520
0.0164471146505591	1	19	118.1796875	Oxidoreductase activity, acting on a sulfur group of donors, NAD(P) as acceptor	http://amigo.geneontology.org/cgi-bin/amigo/term_details?term=GO:0016668	HORVU.MOREX.R3.4HG0341820
0.016819056707253	1	20	112.270703125	Pseudouridine synthase activity	http://amigo.geneontology.org/cgi-bin/amigo/term_details?term=GO:0009982	HORVU.MOREX.R3.2HG0116520
0.000789192075961521	2	45	99.7961805555556	Polygalacturonase activity	http://amigo.geneontology.org/cgi-bin/amigo/term_details?term=GO:0004650	HORVU.MOREX.R3.4HG0412200 HORVU.MOREX.R3.6HG0620820
0.000808327185350907	2	46	97.6266983695652	Ribosome binding	http://amigo.geneontology.org/cgi-bin/amigo/term_details?term=GO:0043022	HORVU.MOREX.R3.5HG0496010 HORVU.MOREX.R3.7HG0735200
0.0187842399846855	1	23	97.6266983695652	Chaperone binding	http://amigo.geneontology.org/cgi-bin/amigo/term_details?term=GO:0051087	HORVU.MOREX.R3.5HG0480620
7.40115380719381e-12	8	222	80.9158220720721	MRNA binding	http://amigo.geneontology.org/cgi-bin/amigo/term_details?term=GO:0003729	HORVU.MOREX.R3.4HG0376960 HORVU.MOREX.R3.3HG0327680 HORVU.MOREX.R3.6HG0628850 HORVU.MOREX.R3.1HG0065530 HORVU.MOREX.R3.1HG0087990 HORVU.MOREX.R3.5HG0452940 HORVU.MOREX.R3.6HG0597760 HORVU.MOREX.R3.6HG0614660
3.74562502944252e-09	6	168	80.193359375	GTPase activity	http://amigo.geneontology.org/cgi-bin/amigo/term_details?term=GO:0003924	HORVU.MOREX.R3.2HG0107850 HORVU.MOREX.R3.2HG0166260 HORVU.MOREX.R3.7HG0735200 HORVU.MOREX.R3.2HG0114280 HORVU.MOREX.R3.4HG0385270 HORVU.MOREX.R3.5HG0520260
0.0230353722878905	1	29	77.4280711206897	Phosphotransferase activity, phosphate group as acceptor	http://amigo.geneontology.org/cgi-bin/amigo/term_details?term=GO:0016776	HORVU.MOREX.R3.1HG0057590
5.47095525343435e-05	3	89	75.6881144662921	Glutathione transferase activity	http://amigo.geneontology.org/cgi-bin/amigo/term_details?term=GO:0004364	HORVU.MOREX.R3.1HG0055010 HORVU.MOREX.R3.3HG0313690 HORVU.MOREX.R3.7HG0737960
1.05212312700908e-08	6	220	61.2385653409091	Nucleoside binding	http://amigo.geneontology.org/cgi-bin/amigo/term_details?term=GO:0001882	HORVU.MOREX.R3.2HG0166260 HORVU.MOREX.R3.2HG0107850 HORVU.MOREX.R3.2HG0114280 HORVU.MOREX.R3.4HG0385270 HORVU.MOREX.R3.5HG0520260 HORVU.MOREX.R3.7HG0735200
0.0283265068401612	1	37	60.686866554054	Single-stranded DNA binding	http://amigo.geneontology.org/cgi-bin/amigo/term_details?term=GO:0003697	HORVU.MOREX.R3.1HG0065530
3.76188420782292e-29	22	913	54.1063629518072	RNA binding	http://amigo.geneontology.org/cgi-bin/amigo/term_details?term=GO:0003723	HORVU.MOREX.R3.2HG0107850 HORVU.MOREX.R3.2HG0112820 HORVU.MOREX.R3.4HG0376960 HORVU.MOREX.R3.4HG0378160 HORVU.MOREX.R3.6HG0597760 HORVU.MOREX.R3.7HG0735200 HORVU.MOREX.R3.3HG0232930 HORVU.MOREX.R3.3HG0327680 HORVU.MOREX.R3.6HG0628850 HORVU.MOREX.R3.1HG0065530 HORVU.MOREX.R3.1HG0087990 HORVU.MOREX.R3.2HG0116210 HORVU.MOREX.R3.2HG0116520 HORVU.MOREX.R3.2HG0177650 HORVU.MOREX.R3.4HG0385270 HORVU.MOR…
0.0001597287955944	3	132	51.0321377840909	Vitamin binding	http://amigo.geneontology.org/cgi-bin/amigo/term_details?term=GO:0019842	HORVU.MOREX.R3.1HG0044640 HORVU.MOREX.R3.1HG0083320 HORVU.MOREX.R3.5HG0500680
0.032699147832973	1	45	49.8980902777778	Lysine N-methyltransferase activity	http://amigo.geneontology.org/cgi-bin/amigo/term_details?term=GO:0016278	HORVU.MOREX.R3.3HG0280970
0.00333079501133932	2	99	45.3619002525253	Pyridoxal phosphate binding	http://amigo.geneontology.org/cgi-bin/amigo/term_details?term=GO:0030170	HORVU.MOREX.R3.1HG0044640 HORVU.MOREX.R3.1HG0083320
0.0355530073893307	1	51	44.0277267156863	Carbon-oxygen lyase activity, acting on phosphates	http://amigo.geneontology.org/cgi-bin/amigo/term_details?term=GO:0016838	HORVU.MOREX.R3.1HG0083320
0.00353941198728317	2	103	43.6002730582524	Manganese ion binding	http://amigo.geneontology.org/cgi-bin/amigo/term_details?term=GO:0030145	HORVU.MOREX.R3.1HG0017770 HORVU.MOREX.R3.3HG0252270
0.00037100261623581	3	182	37.0123197115385	Oxidoreductase activity, acting on CH-OH group of donors	http://amigo.geneontology.org/cgi-bin/amigo/term_details?term=GO:0016614	HORVU.MOREX.R3.3HG0318260 HORVU.MOREX.R3.3HG0254010 HORVU.MOREX.R3.5HG0475790
0.00493942208720337	2	123	36.5107977642276	Electron transfer activity	http://amigo.geneontology.org/cgi-bin/amigo/term_details?term=GO:0009055	HORVU.MOREX.R3.5HG0511860 HORVU.MOREX.R3.7HG0664720
0.0052317969675125	2	130	34.5448317307692	Serine-type endopeptidase activity	http://amigo.geneontology.org/cgi-bin/amigo/term_details?term=GO:0004252	HORVU.MOREX.R3.1HG0075730 HORVU.MOREX.R3.6HG0620630
0.0052317969675125	2	131	34.2811307251908	Antiporter activity	http://amigo.geneontology.org/cgi-bin/amigo/term_details?term=GO:0015297	HORVU.MOREX.R3.5HG0471790 HORVU.MOREX.R3.5HG0467820
0.0415998924306645	1	66	34.0214251893939	RNA helicase activity	http://amigo.geneontology.org/cgi-bin/amigo/term_details?term=GO:0003724	HORVU.MOREX.R3.6HG0597760
2.32609080206124e-08	7	468	33.5852530715812	Hydrolase activity, hydrolyzing O-glycosyl compounds	http://amigo.geneontology.org/cgi-bin/amigo/term_details?term=GO:0004553	HORVU.MOREX.R3.4HG0336280 HORVU.MOREX.R3.4HG0402760 HORVU.MOREX.R3.2HG0198790 HORVU.MOREX.R3.2HG0206500 HORVU.MOREX.R3.3HG0226040 HORVU.MOREX.R3.4HG0412200 HORVU.MOREX.R3.6HG0620820
0.000474872212314665	3	203	33.1834590517241	Isomerase activity	http://amigo.geneontology.org/cgi-bin/amigo/term_details?term=GO:0016853	HORVU.MOREX.R3.5HG0496010 HORVU.MOREX.R3.2HG0116520 HORVU.MOREX.R3.3HG0256040
0.0437590415882926	1	72	31.1863064236111	Phospholipid binding	http://amigo.geneontology.org/cgi-bin/amigo/term_details?term=GO:0005543	HORVU.MOREX.R3.2HG0111570
0.00635764743390983	2	147	30.5498511904762	S-adenosylmethionine-dependent methyltransferase activity	http://amigo.geneontology.org/cgi-bin/amigo/term_details?term=GO:0008757	HORVU.MOREX.R3.3HG0280970 HORVU.MOREX.R3.5HG0488940
9.28355409588302e-12	11	843	29.2995903766311	Nucleoside-triphosphatase activity	http://amigo.geneontology.org/cgi-bin/amigo/term_details?term=GO:0017111	HORVU.MOREX.R3.2HG0107850 HORVU.MOREX.R3.2HG0166260 HORVU.MOREX.R3.6HG0597760 HORVU.MOREX.R3.7HG0735200 HORVU.MOREX.R3.2HG0114280 HORVU.MOREX.R3.2HG0119860 HORVU.MOREX.R3.2HG0173350 HORVU.MOREX.R3.3HG0256040 HORVU.MOREX.R3.4HG0385270 HORVU.MOREX.R3.5HG0480620 HORVU.MOREX.R3.5HG0520260
7.38817971233534e-05	4	313	28.6953873801917	Methyltransferase activity	http://amigo.geneontology.org/cgi-bin/amigo/term_details?term=GO:0008168	HORVU.MOREX.R3.3HG0280970 HORVU.MOREX.R3.3HG0310400 HORVU.MOREX.R3.3HG0329300 HORVU.MOREX.R3.5HG0488940
1.08214623548884e-06	6	505	26.6781868811881	Catalytic activity, acting on RNA	http://amigo.geneontology.org/cgi-bin/amigo/term_details?term=GO:0140098	HORVU.MOREX.R3.6HG0597760 HORVU.MOREX.R3.5HG0490210 HORVU.MOREX.R3.2HG0149510 HORVU.MOREX.R3.3HG0310400 HORVU.MOREX.R3.3HG0329300 HORVU.MOREX.R3.5HG0488940
0.0106507136806029	2	201	22.3424284825871	Flavin adenine dinucleotide binding	http://amigo.geneontology.org/cgi-bin/amigo/term_details?term=GO:0050660	HORVU.MOREX.R3.3HG0254010 HORVU.MOREX.R3.5HG0475790
1.05212312700908e-08	9	991	20.3922568743693	Transition metal ion binding	http://amigo.geneontology.org/cgi-bin/amigo/term_details?term=GO:0046914	HORVU.MOREX.R3.1HG0017770 HORVU.MOREX.R3.1HG0065530 HORVU.MOREX.R3.1HG0073500 HORVU.MOREX.R3.2HG0158150 HORVU.MOREX.R3.3HG0243220 HORVU.MOREX.R3.3HG0252270 HORVU.MOREX.R3.3HG0302570 HORVU.MOREX.R3.5HG0480620 HORVU.MOREX.R3.6HG0540880
0.0115202670924956	2	222	20.228955518018	Catalytic activity, acting on DNA	http://amigo.geneontology.org/cgi-bin/amigo/term_details?term=GO:0140097	HORVU.MOREX.R3.3HG0256040 HORVU.MOREX.R3.3HG0298520
0.0117317757875943	2	227	19.7833838105727	Endonuclease activity	http://amigo.geneontology.org/cgi-bin/amigo/term_details?term=GO:0004519	HORVU.MOREX.R3.5HG0490210 HORVU.MOREX.R3.6HG0606940
0.00259719923692507	3	381	17.6804256889764	Endopeptidase activity	http://amigo.geneontology.org/cgi-bin/amigo/term_details?term=GO:0004175	HORVU.MOREX.R3.1HG0075730 HORVU.MOREX.R3.3HG0274060 HORVU.MOREX.R3.6HG0620630
7.42304252087432e-05	5	665	16.8828125	ATPase activity	http://amigo.geneontology.org/cgi-bin/amigo/term_details?term=GO:0016887	HORVU.MOREX.R3.6HG0597760 HORVU.MOREX.R3.2HG0119860 HORVU.MOREX.R3.2HG0173350 HORVU.MOREX.R3.3HG0256040 HORVU.MOREX.R3.5HG0480620
6.93017203643509e-10	12	1750	15.397125	Oxidoreductase activity	http://amigo.geneontology.org/cgi-bin/amigo/term_details?term=GO:0016491	HORVU.MOREX.R3.1HG0073500 HORVU.MOREX.R3.3HG0302570 HORVU.MOREX.R3.3HG0318260 HORVU.MOREX.R3.7HG0737470 HORVU.MOREX.R3.4HG0341820 HORVU.MOREX.R3.2HG0158150 HORVU.MOREX.R3.3HG0254010 HORVU.MOREX.R3.5HG0475790 HORVU.MOREX.R3.5HG0508190 HORVU.MOREX.R3.5HG0511860 HORVU.MOREX.R3.6HG0540880 HORVU.MOREX.R3.7HG0664720
0.0164471146505591	2	302	14.8702918046358	Ligase activity	http://amigo.geneontology.org/cgi-bin/amigo/term_details?term=GO:0016874	HORVU.MOREX.R3.1HG0055820 HORVU.MOREX.R3.2HG0149510
0.016940947242249	2	319	14.0778311128527	Double-stranded DNA binding	http://amigo.geneontology.org/cgi-bin/amigo/term_details?term=GO:0003690	HORVU.MOREX.R3.1HG0065530 HORVU.MOREX.R3.7HG0680970
0.000959851227926226	4	670	13.4054570895522	Peptidase activity	http://amigo.geneontology.org/cgi-bin/amigo/term_details?term=GO:0008233	HORVU.MOREX.R3.1HG0075730 HORVU.MOREX.R3.3HG0274060 HORVU.MOREX.R3.5HG0462580 HORVU.MOREX.R3.6HG0620630
0.0318734386947066	2	467	9.61633431477516	ADP binding	http://amigo.geneontology.org/cgi-bin/amigo/term_details?term=GO:0043531	HORVU.MOREX.R3.2HG0096080 HORVU.MOREX.R3.6HG0632840
0.0110167566206354	3	719	9.36890429415855	Zinc ion binding	http://amigo.geneontology.org/cgi-bin/amigo/term_details?term=GO:0008270	HORVU.MOREX.R3.1HG0065530 HORVU.MOREX.R3.3HG0243220 HORVU.MOREX.R3.6HG0540880
0.032699147832973	2	480	9.35589192708333	Transferase activity, transferring acyl groups	http://amigo.geneontology.org/cgi-bin/amigo/term_details?term=GO:0016746	HORVU.MOREX.R3.5HG0456510 HORVU.MOREX.R3.5HG0529400
0.00793124610976495	4	1262	7.11700178288431	Transmembrane transporter activity	http://amigo.geneontology.org/cgi-bin/amigo/term_details?term=GO:0022857	HORVU.MOREX.R3.5HG0471790 HORVU.MOREX.R3.1HG0041600 HORVU.MOREX.R3.2HG0105020 HORVU.MOREX.R3.5HG0467820
0.00635764743390983	5	1972	5.69324052358012	Transferase activity, transferring phosphorus-containing groups	http://amigo.geneontology.org/cgi-bin/amigo/term_details?term=GO:0016772	HORVU.MOREX.R3.1HG0057590 HORVU.MOREX.R3.1HG0012160 HORVU.MOREX.R3.3HG0298520 HORVU.MOREX.R3.4HG0353940 HORVU.MOREX.R3.5HG0420330
0.0323262909629021	3	1260	5.34622395833333	Hydrolase activity, acting on ester bonds	http://amigo.geneontology.org/cgi-bin/amigo/term_details?term=GO:0016788	HORVU.MOREX.R3.5HG0490210 HORVU.MOREX.R3.2HG0149510 HORVU.MOREX.R3.6HG0606940
0.016926753865919	4	1809	4.96498410724157	Kinase activity	http://amigo.geneontology.org/cgi-bin/amigo/term_details?term=GO:0016301	HORVU.MOREX.R3.1HG0057590 HORVU.MOREX.R3.1HG0012160 HORVU.MOREX.R3.4HG0353940 HORVU.MOREX.R3.5HG0420330
0.0478862043236733	3	1601	4.20752166614616	Protein kinase activity	http://amigo.geneontology.org/cgi-bin/amigo/term_details?term=GO:0004672	HORVU.MOREX.R3.1HG0012160 HORVU.MOREX.R3.4HG0353940 HORVU.MOREX.R3.5HG0420330
pande	CelC
Enrichment FDR	nGenes	Pathway Genes	Fold Enrichment	Pathway	URL	Genes
1.73904557203206e-05	2	7	641.546875	Cytosolic large ribosomal subunit	http://amigo.geneontology.org/cgi-bin/amigo/term_details?term=GO:0022625	HORVU.MOREX.R3.2HG0112820 HORVU.MOREX.R3.4HG0378160
1.39565855040563e-07	3	12	561.353515625	Large ribosomal subunit	http://amigo.geneontology.org/cgi-bin/amigo/term_details?term=GO:0015934	HORVU.MOREX.R3.2HG0112820 HORVU.MOREX.R3.4HG0378160 HORVU.MOREX.R3.7HG0689220
2.5856496083868e-24	11	62	398.379914314516	Ribosome	http://amigo.geneontology.org/cgi-bin/amigo/term_details?term=GO:0005840	HORVU.MOREX.R3.2HG0112820 HORVU.MOREX.R3.4HG0378160 HORVU.MOREX.R3.1HG0026070 HORVU.MOREX.R3.1HG0087990 HORVU.MOREX.R3.2HG0194250 HORVU.MOREX.R3.4HG0332030 HORVU.MOREX.R3.4HG0349380 HORVU.MOREX.R3.5HG0455100 HORVU.MOREX.R3.5HG0466770 HORVU.MOREX.R3.6HG0628850 HORVU.MOREX.R3.7HG0689220
0.00605694642570353	1	6	374.235677083333	Glycerol-3-phosphate dehydrogenase complex	http://amigo.geneontology.org/cgi-bin/amigo/term_details?term=GO:0009331	HORVU.MOREX.R3.3HG0318260
6.05554932123637e-05	2	14	320.7734375	Plastid nucleoid	http://amigo.geneontology.org/cgi-bin/amigo/term_details?term=GO:0042646	HORVU.MOREX.R3.3HG0232930 HORVU.MOREX.R3.1HG0040570
0.00904261749369082	1	10	224.54140625	Chloroplast nucleoid	http://amigo.geneontology.org/cgi-bin/amigo/term_details?term=GO:0042644	HORVU.MOREX.R3.1HG0040570
0.018794199822044	1	23	97.6266983695652	Nuclear chromatin	http://amigo.geneontology.org/cgi-bin/amigo/term_details?term=GO:0000790	HORVU.MOREX.R3.5HG0520550
1.39565855040563e-07	5	172	65.2736646075581	Apoplast	http://amigo.geneontology.org/cgi-bin/amigo/term_details?term=GO:0048046	HORVU.MOREX.R3.1HG0073500 HORVU.MOREX.R3.2HG0158150 HORVU.MOREX.R3.3HG0252270 HORVU.MOREX.R3.3HG0302570 HORVU.MOREX.R3.5HG0480620
6.05554932123637e-05	3	111	60.6868665540541	Plastid stroma	http://amigo.geneontology.org/cgi-bin/amigo/term_details?term=GO:0009532	HORVU.MOREX.R3.3HG0232930 HORVU.MOREX.R3.1HG0040570 HORVU.MOREX.R3.5HG0480620
4.929737526406e-07	5	233	48.1848511266094	Cell wall	http://amigo.geneontology.org/cgi-bin/amigo/term_details?term=GO:0005618	HORVU.MOREX.R3.4HG0402760 HORVU.MOREX.R3.7HG0737470 HORVU.MOREX.R3.2HG0193180 HORVU.MOREX.R3.3HG0252270 HORVU.MOREX.R3.4HG0412200
0.0320058505909883	1	48	46.7794596354167	Mitochondrial matrix	http://amigo.geneontology.org/cgi-bin/amigo/term_details?term=GO:0005759	HORVU.MOREX.R3.5HG0480620
2.40007628638843e-19	15	738	45.6384972052846	Non-membrane-bounded organelle	http://amigo.geneontology.org/cgi-bin/amigo/term_details?term=GO:0043228	HORVU.MOREX.R3.2HG0112820 HORVU.MOREX.R3.4HG0378160 HORVU.MOREX.R3.3HG0232930 HORVU.MOREX.R3.1HG0026070 HORVU.MOREX.R3.1HG0040570 HORVU.MOREX.R3.1HG0087990 HORVU.MOREX.R3.2HG0194250 HORVU.MOREX.R3.3HG0256040 HORVU.MOREX.R3.4HG0332030 HORVU.MOREX.R3.4HG0349380 HORVU.MOREX.R3.5HG0455100 HORVU.MOREX.R3.5HG0466770 HORVU.MOREX.R3.6HG0628850 HORVU.MOREX.R3.7HG0689220 HORVU.MOREX.R3.5HG0520550
1.22553070007906e-05	4	209	42.9744318181818	Ribonucleoprotein complex	http://amigo.geneontology.org/cgi-bin/amigo/term_details?term=GO:1990904	HORVU.MOREX.R3.2HG0112820 HORVU.MOREX.R3.4HG0378160 HORVU.MOREX.R3.7HG0735200 HORVU.MOREX.R3.7HG0689220
0.00255427791858867	2	107	41.9703563084112	Chloroplast stroma	http://amigo.geneontology.org/cgi-bin/amigo/term_details?term=GO:0009570	HORVU.MOREX.R3.1HG0040570 HORVU.MOREX.R3.5HG0480620
2.53269565709079e-16	14	937	33.5494096851654	Plastid	http://amigo.geneontology.org/cgi-bin/amigo/term_details?term=GO:0009536	HORVU.MOREX.R3.2HG0166260 HORVU.MOREX.R3.4HG0376960 HORVU.MOREX.R3.5HG0480620 HORVU.MOREX.R3.1HG0055820 HORVU.MOREX.R3.3HG0232930 HORVU.MOREX.R3.3HG0327680 HORVU.MOREX.R3.4HG0341820 HORVU.MOREX.R3.7HG0641130 HORVU.MOREX.R3.1HG0040570 HORVU.MOREX.R3.1HG0087990 HORVU.MOREX.R3.1HG0088680 HORVU.MOREX.R3.4HG0336280 HORVU.MOREX.R3.5HG0500680 HORVU.MOREX.R3.6HG0560910
0.0429404202431162	1	68	33.0207950367647	Plant-type cell wall	http://amigo.geneontology.org/cgi-bin/amigo/term_details?term=GO:0009505	HORVU.MOREX.R3.7HG0737470
1.30995530450649e-13	12	882	30.5498511904762	Chloroplast	http://amigo.geneontology.org/cgi-bin/amigo/term_details?term=GO:0009507	HORVU.MOREX.R3.2HG0166260 HORVU.MOREX.R3.4HG0376960 HORVU.MOREX.R3.5HG0480620 HORVU.MOREX.R3.1HG0055820 HORVU.MOREX.R3.3HG0327680 HORVU.MOREX.R3.4HG0341820 HORVU.MOREX.R3.7HG0641130 HORVU.MOREX.R3.1HG0040570 HORVU.MOREX.R3.4HG0336280 HORVU.MOREX.R3.5HG0500680 HORVU.MOREX.R3.6HG0560910 HORVU.MOREX.R3.3HG0232930
0.000446773323003408	3	233	28.9109106759657	Photosynthetic membrane	http://amigo.geneontology.org/cgi-bin/amigo/term_details?term=GO:0034357	HORVU.MOREX.R3.4HG0376960 HORVU.MOREX.R3.5HG0480620 HORVU.MOREX.R3.7HG0680970
8.88097013320663e-09	8	667	26.9315029985007	Extracellular region	http://amigo.geneontology.org/cgi-bin/amigo/term_details?term=GO:0005576	HORVU.MOREX.R3.1HG0073500 HORVU.MOREX.R3.2HG0158150 HORVU.MOREX.R3.2HG0193180 HORVU.MOREX.R3.3HG0222530 HORVU.MOREX.R3.3HG0252270 HORVU.MOREX.R3.3HG0302570 HORVU.MOREX.R3.5HG0480620 HORVU.MOREX.R3.7HG0737470
8.66415236430083e-05	4	379	23.6983014511873	Cytosol	http://amigo.geneontology.org/cgi-bin/amigo/term_details?term=GO:0005829	HORVU.MOREX.R3.2HG0112820 HORVU.MOREX.R3.3HG0318260 HORVU.MOREX.R3.4HG0378160 HORVU.MOREX.R3.5HG0466770
0.00888472073792217	2	213	21.0837001173709	Chloroplast thylakoid membrane	http://amigo.geneontology.org/cgi-bin/amigo/term_details?term=GO:0009535	HORVU.MOREX.R3.4HG0376960 HORVU.MOREX.R3.5HG0480620
0.00114174691847389	3	331	20.3511848564955	Chromosome	http://amigo.geneontology.org/cgi-bin/amigo/term_details?term=GO:0005694	HORVU.MOREX.R3.1HG0040570 HORVU.MOREX.R3.3HG0256040 HORVU.MOREX.R3.5HG0520550
4.92102774545157e-06	7	1150	13.6677377717391	Cell periphery	http://amigo.geneontology.org/cgi-bin/amigo/term_details?term=GO:0071944	HORVU.MOREX.R3.4HG0402760 HORVU.MOREX.R3.7HG0664720 HORVU.MOREX.R3.7HG0737470 HORVU.MOREX.R3.1HG0041280 HORVU.MOREX.R3.2HG0193180 HORVU.MOREX.R3.3HG0252270 HORVU.MOREX.R3.4HG0412200
0.0194814865318972	2	367	12.2365888964578	Membrane-enclosed lumen	http://amigo.geneontology.org/cgi-bin/amigo/term_details?term=GO:0031974	HORVU.MOREX.R3.5HG0480620 HORVU.MOREX.R3.5HG0520550
0.0256748418326314	2	431	10.4195548143852	Mitochondrion	http://amigo.geneontology.org/cgi-bin/amigo/term_details?term=GO:0005739	HORVU.MOREX.R3.5HG0480620 HORVU.MOREX.R3.6HG0597760
3.71915409744089e-05	7	1640	9.58408441310976	Protein-containing complex	http://amigo.geneontology.org/cgi-bin/amigo/term_details?term=GO:0032991	HORVU.MOREX.R3.2HG0112820 HORVU.MOREX.R3.4HG0378160 HORVU.MOREX.R3.7HG0735200 HORVU.MOREX.R3.2HG0116210 HORVU.MOREX.R3.3HG0318260 HORVU.MOREX.R3.4HG0412610 HORVU.MOREX.R3.7HG0689220
pande	BioP
Enrichment FDR	nGenes	Pathway Genes	Fold Enrichment	Pathway	URL	Genes
0.000122241717050443	2	9	498.980902777778	Chloroplast rRNA processing	http://amigo.geneontology.org/cgi-bin/amigo/term_details?term=GO:1901259	HORVU.MOREX.R3.4HG0376960 HORVU.MOREX.R3.3HG0232930
0.000160725576889054	2	11	408.257102272727	Chloroplast fission	http://amigo.geneontology.org/cgi-bin/amigo/term_details?term=GO:0010020	HORVU.MOREX.R3.2HG0166260 HORVU.MOREX.R3.1HG0055820
0.0108384187710072	1	6	374.235677083333	Positive regulation of histone modification	http://amigo.geneontology.org/cgi-bin/amigo/term_details?term=GO:0031058	HORVU.MOREX.R3.5HG0520550
0.0108384187710072	1	6	374.235677083333	GTP metabolic process	http://amigo.geneontology.org/cgi-bin/amigo/term_details?term=GO:0046039	HORVU.MOREX.R3.1HG0057590
0.0108384187710072	1	6	374.235677083333	Regulation of oxidoreductase activity	http://amigo.geneontology.org/cgi-bin/amigo/term_details?term=GO:0051341	HORVU.MOREX.R3.5HG0480620
0.0108384187710072	1	6	374.235677083333	Regulation of cell shape	http://amigo.geneontology.org/cgi-bin/amigo/term_details?term=GO:0008360	HORVU.MOREX.R3.1HG0055820
0.0108384187710072	1	6	374.235677083333	Threonine biosynthetic process	http://amigo.geneontology.org/cgi-bin/amigo/term_details?term=GO:0009088	HORVU.MOREX.R3.1HG0083320
0.0115885267525989	1	7	320.7734375	NADH oxidation	http://amigo.geneontology.org/cgi-bin/amigo/term_details?term=GO:0006116	HORVU.MOREX.R3.3HG0318260
0.0115885267525989	1	7	320.7734375	Cotyledon development	http://amigo.geneontology.org/cgi-bin/amigo/term_details?term=GO:0048825	HORVU.MOREX.R3.3HG0243220
0.0115885267525989	1	7	320.7734375	RRNA base methylation	http://amigo.geneontology.org/cgi-bin/amigo/term_details?term=GO:0070475	HORVU.MOREX.R3.3HG0329300
5.55304606349166e-10	5	40	280.6767578125	Translational elongation	http://amigo.geneontology.org/cgi-bin/amigo/term_details?term=GO:0006414	HORVU.MOREX.R3.2HG0107850 HORVU.MOREX.R3.7HG0735200 HORVU.MOREX.R3.2HG0116210 HORVU.MOREX.R3.2HG0122090 HORVU.MOREX.R3.4HG0385270
4.22520064659479e-06	3	24	280.6767578125	Phenylpropanoid catabolic process	http://amigo.geneontology.org/cgi-bin/amigo/term_details?term=GO:0046271	HORVU.MOREX.R3.1HG0073500 HORVU.MOREX.R3.2HG0158150 HORVU.MOREX.R3.3HG0302570
0.00030745934248427	2	16	280.6767578125	Cellular response to reactive oxygen species	http://amigo.geneontology.org/cgi-bin/amigo/term_details?term=GO:0034614	HORVU.MOREX.R3.1HG0057590 HORVU.MOREX.R3.5HG0480620
0.0123014143538064	1	8	280.6767578125	Dipeptide transmembrane transport	http://amigo.geneontology.org/cgi-bin/amigo/term_details?term=GO:0035442	HORVU.MOREX.R3.1HG0041600
0.0123014143538064	1	8	280.6767578125	Photosystem I assembly	http://amigo.geneontology.org/cgi-bin/amigo/term_details?term=GO:0048564	HORVU.MOREX.R3.6HG0606940
0.012541435329189	1	9	249.490451388889	Plasmodesmata-mediated intercellular transport	http://amigo.geneontology.org/cgi-bin/amigo/term_details?term=GO:0010497	HORVU.MOREX.R3.6HG0597760
0.012541435329189	1	9	249.490451388889	Cold acclimation	http://amigo.geneontology.org/cgi-bin/amigo/term_details?term=GO:0009631	HORVU.MOREX.R3.1HG0065530
0.000453089196611539	2	20	224.54140625	de novo protein folding	http://amigo.geneontology.org/cgi-bin/amigo/term_details?term=GO:0006458	HORVU.MOREX.R3.5HG0480620 HORVU.MOREX.R3.5HG0496010
0.0130898161968644	1	10	224.54140625	Acetyl-CoA biosynthetic process from pyruvate	http://amigo.geneontology.org/cgi-bin/amigo/term_details?term=GO:0006086	HORVU.MOREX.R3.5HG0508190
0.0130898161968644	1	10	224.54140625	Proton-transporting two-sector ATPase complex assembly	http://amigo.geneontology.org/cgi-bin/amigo/term_details?term=GO:0070071	HORVU.MOREX.R3.6HG0560910
0.0130898161968644	1	10	224.54140625	Sodium ion transport	http://amigo.geneontology.org/cgi-bin/amigo/term_details?term=GO:0006814	HORVU.MOREX.R3.5HG0467820
0.0137963934572588	1	11	204.128551136364	Cell wall polysaccharide catabolic process	http://amigo.geneontology.org/cgi-bin/amigo/term_details?term=GO:0044347	HORVU.MOREX.R3.2HG0206500
0.0142877680773546	1	12	187.117838541667	DNA topological change	http://amigo.geneontology.org/cgi-bin/amigo/term_details?term=GO:0006265	HORVU.MOREX.R3.3HG0256040
0.00081707853216679	2	29	154.856142241379	Plant-type secondary cell wall biogenesis	http://amigo.geneontology.org/cgi-bin/amigo/term_details?term=GO:0009834	HORVU.MOREX.R3.1HG0041280 HORVU.MOREX.R3.3HG0288960
0.0153200731500457	1	15	149.694270833333	Plant-type ovary development	http://amigo.geneontology.org/cgi-bin/amigo/term_details?term=GO:0035670	HORVU.MOREX.R3.7HG0641130
0.0153200731500457	1	15	149.694270833333	NcRNA 3 -end processing	http://amigo.geneontology.org/cgi-bin/amigo/term_details?term=GO:0043628	HORVU.MOREX.R3.5HG0490210
1.78011611934648e-08	5	83	135.265907379518	Chloroplast organization	http://amigo.geneontology.org/cgi-bin/amigo/term_details?term=GO:0009658	HORVU.MOREX.R3.2HG0166260 HORVU.MOREX.R3.6HG0560910 HORVU.MOREX.R3.7HG0680970 HORVU.MOREX.R3.7HG0641130 HORVU.MOREX.R3.1HG0055820
3.3858168341894e-05	3	51	132.083180147059	RNA methylation	http://amigo.geneontology.org/cgi-bin/amigo/term_details?term=GO:0001510	HORVU.MOREX.R3.3HG0329300 HORVU.MOREX.R3.3HG0310400 HORVU.MOREX.R3.5HG0488940
5.55304606349166e-10	6	106	127.098909198113	Plastid organization	http://amigo.geneontology.org/cgi-bin/amigo/term_details?term=GO:0009657	HORVU.MOREX.R3.2HG0166260 HORVU.MOREX.R3.6HG0560910 HORVU.MOREX.R3.7HG0680970 HORVU.MOREX.R3.7HG0641130 HORVU.MOREX.R3.1HG0055820 HORVU.MOREX.R3.4HG0341820
5.92440053571488e-28	17	333	114.630747935435	Translation	http://amigo.geneontology.org/cgi-bin/amigo/term_details?term=GO:0006412	HORVU.MOREX.R3.2HG0107850 HORVU.MOREX.R3.7HG0735200 HORVU.MOREX.R3.1HG0026070 HORVU.MOREX.R3.1HG0087990 HORVU.MOREX.R3.2HG0112820 HORVU.MOREX.R3.2HG0116210 HORVU.MOREX.R3.2HG0122090 HORVU.MOREX.R3.2HG0149510 HORVU.MOREX.R3.2HG0194250 HORVU.MOREX.R3.4HG0332030 HORVU.MOREX.R3.4HG0349380 HORVU.MOREX.R3.4HG0378160 HORVU.MOREX.R3.4HG0385270 HORVU.MOREX.R3.5HG0455100 HORVU.MOREX.R3.5HG0466770 HORVU.MOR…
9.67436887776183e-29	18	390	103.634495192308	Amide biosynthetic process	http://amigo.geneontology.org/cgi-bin/amigo/term_details?term=GO:0043604	HORVU.MOREX.R3.2HG0107850 HORVU.MOREX.R3.7HG0735200 HORVU.MOREX.R3.1HG0026070 HORVU.MOREX.R3.1HG0087990 HORVU.MOREX.R3.2HG0112820 HORVU.MOREX.R3.2HG0116210 HORVU.MOREX.R3.2HG0122090 HORVU.MOREX.R3.2HG0149510 HORVU.MOREX.R3.2HG0194250 HORVU.MOREX.R3.4HG0332030 HORVU.MOREX.R3.4HG0349380 HORVU.MOREX.R3.4HG0378160 HORVU.MOREX.R3.4HG0385270 HORVU.MOREX.R3.5HG0455100 HORVU.MOREX.R3.5HG0466770 HORVU.MOR…
0.0194989841320694	1	23	97.6266983695652	Monocarboxylic acid transport	http://amigo.geneontology.org/cgi-bin/amigo/term_details?term=GO:0015718	HORVU.MOREX.R3.5HG0471790
0.0194989841320694	1	23	97.6266983695652	Cell redox homeostasis	http://amigo.geneontology.org/cgi-bin/amigo/term_details?term=GO:0045454	HORVU.MOREX.R3.4HG0341820
3.1091753069064e-31	20	468	95.9578659188034	Peptide metabolic process	http://amigo.geneontology.org/cgi-bin/amigo/term_details?term=GO:0006518	HORVU.MOREX.R3.2HG0107850 HORVU.MOREX.R3.7HG0735200 HORVU.MOREX.R3.7HG0737960 HORVU.MOREX.R3.1HG0026070 HORVU.MOREX.R3.1HG0055010 HORVU.MOREX.R3.1HG0087990 HORVU.MOREX.R3.2HG0112820 HORVU.MOREX.R3.2HG0116210 HORVU.MOREX.R3.2HG0122090 HORVU.MOREX.R3.2HG0149510 HORVU.MOREX.R3.2HG0194250 HORVU.MOREX.R3.3HG0313690 HORVU.MOREX.R3.4HG0332030 HORVU.MOREX.R3.4HG0349380 HORVU.MOREX.R3.4HG0378160 HORVU.MOR…
0.00205505271733906	2	50	89.8165625	Peptidyl-lysine methylation	http://amigo.geneontology.org/cgi-bin/amigo/term_details?term=GO:0018022	HORVU.MOREX.R3.3HG0280970 HORVU.MOREX.R3.5HG0520550
0.0200560663042709	1	25	89.8165625	Pseudouridine synthesis	http://amigo.geneontology.org/cgi-bin/amigo/term_details?term=GO:0001522	HORVU.MOREX.R3.2HG0116520
2.52896007662383e-31	21	563	83.7543433614565	Cellular amide metabolic process	http://amigo.geneontology.org/cgi-bin/amigo/term_details?term=GO:0043603	HORVU.MOREX.R3.2HG0107850 HORVU.MOREX.R3.7HG0735200 HORVU.MOREX.R3.7HG0737960 HORVU.MOREX.R3.1HG0026070 HORVU.MOREX.R3.1HG0055010 HORVU.MOREX.R3.1HG0087990 HORVU.MOREX.R3.2HG0112820 HORVU.MOREX.R3.2HG0116210 HORVU.MOREX.R3.2HG0122090 HORVU.MOREX.R3.2HG0149510 HORVU.MOREX.R3.2HG0194250 HORVU.MOREX.R3.3HG0313690 HORVU.MOREX.R3.4HG0332030 HORVU.MOREX.R3.4HG0349380 HORVU.MOREX.R3.4HG0378160 HORVU.MOR…
5.61754346186366e-06	4	114	78.7864583333333	RRNA processing	http://amigo.geneontology.org/cgi-bin/amigo/term_details?term=GO:0006364	HORVU.MOREX.R3.3HG0329300 HORVU.MOREX.R3.4HG0376960 HORVU.MOREX.R3.5HG0488940 HORVU.MOREX.R3.3HG0232930
2.64791008663154e-07	5	144	77.9657660590278	Macromolecule methylation	http://amigo.geneontology.org/cgi-bin/amigo/term_details?term=GO:0043414	HORVU.MOREX.R3.3HG0329300 HORVU.MOREX.R3.3HG0280970 HORVU.MOREX.R3.3HG0310400 HORVU.MOREX.R3.5HG0488940 HORVU.MOREX.R3.5HG0520550
4.36510420085828e-07	5	165	68.0428503787879	RNA modification	http://amigo.geneontology.org/cgi-bin/amigo/term_details?term=GO:0009451	HORVU.MOREX.R3.3HG0329300 HORVU.MOREX.R3.2HG0116520 HORVU.MOREX.R3.3HG0310400 HORVU.MOREX.R3.5HG0488940 HORVU.MOREX.R3.3HG0243220
0.00282506403818081	2	67	67.0272854477612	Leaf development	http://amigo.geneontology.org/cgi-bin/amigo/term_details?term=GO:0048366	HORVU.MOREX.R3.7HG0641130 HORVU.MOREX.R3.3HG0243220
0.00309503976543278	2	71	63.2511003521127	Nucleoside diphosphate phosphorylation	http://amigo.geneontology.org/cgi-bin/amigo/term_details?term=GO:0006165	HORVU.MOREX.R3.1HG0057590 HORVU.MOREX.R3.5HG0508190
0.000267835858460894	3	113	59.6127627212389	Organelle fission	http://amigo.geneontology.org/cgi-bin/amigo/term_details?term=GO:0048285	HORVU.MOREX.R3.2HG0166260 HORVU.MOREX.R3.1HG0055820 HORVU.MOREX.R3.5HG0520550
0.000268110499148258	3	114	59.08984375	Glutathione metabolic process	http://amigo.geneontology.org/cgi-bin/amigo/term_details?term=GO:0006749	HORVU.MOREX.R3.7HG0737960 HORVU.MOREX.R3.1HG0055010 HORVU.MOREX.R3.3HG0313690
0.00362011875907453	2	80	56.1353515625	DNA conformation change	http://amigo.geneontology.org/cgi-bin/amigo/term_details?term=GO:0071103	HORVU.MOREX.R3.1HG0065530 HORVU.MOREX.R3.3HG0256040
0.0036699086350216	2	81	55.4423225308642	Response to cold	http://amigo.geneontology.org/cgi-bin/amigo/term_details?term=GO:0009409	HORVU.MOREX.R3.1HG0065530 HORVU.MOREX.R3.5HG0480620
0.000422251954042878	3	136	49.5311925551471	Protein folding	http://amigo.geneontology.org/cgi-bin/amigo/term_details?term=GO:0006457	HORVU.MOREX.R3.5HG0480620 HORVU.MOREX.R3.5HG0496010 HORVU.MOREX.R3.2HG0119860
3.23287353988832e-06	5	252	44.5518663194444	NcRNA processing	http://amigo.geneontology.org/cgi-bin/amigo/term_details?term=GO:0034470	HORVU.MOREX.R3.3HG0329300 HORVU.MOREX.R3.4HG0376960 HORVU.MOREX.R3.5HG0490210 HORVU.MOREX.R3.5HG0488940 HORVU.MOREX.R3.3HG0232930
0.000560292258590387	3	153	44.0277267156863	Response to temperature stimulus	http://amigo.geneontology.org/cgi-bin/amigo/term_details?term=GO:0009266	HORVU.MOREX.R3.1HG0065530 HORVU.MOREX.R3.5HG0479680 HORVU.MOREX.R3.5HG0480620
2.44642509001837e-24	20	1093	41.0871740622141	Organonitrogen compound biosynthetic process	http://amigo.geneontology.org/cgi-bin/amigo/term_details?term=GO:1901566	HORVU.MOREX.R3.2HG0107850 HORVU.MOREX.R3.7HG0735200 HORVU.MOREX.R3.1HG0026070 HORVU.MOREX.R3.1HG0057590 HORVU.MOREX.R3.1HG0083320 HORVU.MOREX.R3.1HG0087990 HORVU.MOREX.R3.2HG0112820 HORVU.MOREX.R3.2HG0116210 HORVU.MOREX.R3.2HG0122090 HORVU.MOREX.R3.2HG0149510 HORVU.MOREX.R3.2HG0194250 HORVU.MOREX.R3.4HG0332030 HORVU.MOREX.R3.4HG0349380 HORVU.MOREX.R3.4HG0378160 HORVU.MOREX.R3.4HG0385270 HORVU.MOR…
0.000673837501396866	3	164	41.0746474847561	Response to inorganic substance	http://amigo.geneontology.org/cgi-bin/amigo/term_details?term=GO:0010035	HORVU.MOREX.R3.1HG0057590 HORVU.MOREX.R3.1HG0065530 HORVU.MOREX.R3.5HG0480620
3.26769582292885e-07	6	329	40.9498005319149	NcRNA metabolic process	http://amigo.geneontology.org/cgi-bin/amigo/term_details?term=GO:0034660	HORVU.MOREX.R3.3HG0329300 HORVU.MOREX.R3.4HG0376960 HORVU.MOREX.R3.5HG0490210 HORVU.MOREX.R3.2HG0149510 HORVU.MOREX.R3.5HG0488940 HORVU.MOREX.R3.3HG0232930
0.00739135062060575	2	124	36.2163558467742	Negative regulation of cellular protein metabolic process	http://amigo.geneontology.org/cgi-bin/amigo/term_details?term=GO:0032269	HORVU.MOREX.R3.3HG0222530 HORVU.MOREX.R3.5HG0520550
0.00739135062060575	2	126	35.6414930555556	Nucleic acid phosphodiester bond hydrolysis	http://amigo.geneontology.org/cgi-bin/amigo/term_details?term=GO:0090305	HORVU.MOREX.R3.6HG0606940 HORVU.MOREX.R3.5HG0520550
0.00771328772592916	2	131	34.2811307251908	TRNA processing	http://amigo.geneontology.org/cgi-bin/amigo/term_details?term=GO:0008033	HORVU.MOREX.R3.3HG0329300 HORVU.MOREX.R3.5HG0490210
0.00105481871943464	3	200	33.6812109375	TRNA metabolic process	http://amigo.geneontology.org/cgi-bin/amigo/term_details?term=GO:0006399	HORVU.MOREX.R3.3HG0329300 HORVU.MOREX.R3.5HG0490210 HORVU.MOREX.R3.2HG0149510
0.000125752055887958	4	273	32.8998397435897	Sulfur compound metabolic process	http://amigo.geneontology.org/cgi-bin/amigo/term_details?term=GO:0006790	HORVU.MOREX.R3.7HG0737960 HORVU.MOREX.R3.1HG0055010 HORVU.MOREX.R3.3HG0313690 HORVU.MOREX.R3.5HG0508190
7.55749463867766e-10	9	631	32.0265080229794	Cellular component biogenesis	http://amigo.geneontology.org/cgi-bin/amigo/term_details?term=GO:0044085	HORVU.MOREX.R3.3HG0329300 HORVU.MOREX.R3.4HG0376960 HORVU.MOREX.R3.6HG0606940 HORVU.MOREX.R3.1HG0041280 HORVU.MOREX.R3.3HG0288960 HORVU.MOREX.R3.5HG0480620 HORVU.MOREX.R3.5HG0488940 HORVU.MOREX.R3.6HG0560910 HORVU.MOREX.R3.3HG0232930
0.00120775622416655	3	212	31.7747272995283	Cellular polysaccharide metabolic process	http://amigo.geneontology.org/cgi-bin/amigo/term_details?term=GO:0044264	HORVU.MOREX.R3.1HG0041280 HORVU.MOREX.R3.2HG0206500 HORVU.MOREX.R3.3HG0288960
0.00128818476507077	3	218	30.9001935206422	Peptidyl-amino acid modification	http://amigo.geneontology.org/cgi-bin/amigo/term_details?term=GO:0018193	HORVU.MOREX.R3.3HG0280970 HORVU.MOREX.R3.5HG0496010 HORVU.MOREX.R3.5HG0520550
0.000164495445129915	4	301	29.8393895348837	Cell wall organization or biogenesis	http://amigo.geneontology.org/cgi-bin/amigo/term_details?term=GO:0071554	HORVU.MOREX.R3.1HG0041280 HORVU.MOREX.R3.2HG0193180 HORVU.MOREX.R3.2HG0206500 HORVU.MOREX.R3.3HG0288960
2.92216594336937e-07	7	568	27.6723564040493	RNA processing	http://amigo.geneontology.org/cgi-bin/amigo/term_details?term=GO:0006396	HORVU.MOREX.R3.3HG0329300 HORVU.MOREX.R3.4HG0376960 HORVU.MOREX.R3.6HG0606940 HORVU.MOREX.R3.5HG0490210 HORVU.MOREX.R3.3HG0310400 HORVU.MOREX.R3.5HG0488940 HORVU.MOREX.R3.3HG0232930
1.02812842715915e-19	19	1583	26.9506425694883	Cellular component organization or biogenesis	http://amigo.geneontology.org/cgi-bin/amigo/term_details?term=GO:0071840	HORVU.MOREX.R3.2HG0166260 HORVU.MOREX.R3.3HG0329300 HORVU.MOREX.R3.4HG0376960 HORVU.MOREX.R3.6HG0606940 HORVU.MOREX.R3.5HG0520550 HORVU.MOREX.R3.1HG0041280 HORVU.MOREX.R3.1HG0065530 HORVU.MOREX.R3.2HG0193180 HORVU.MOREX.R3.3HG0256040 HORVU.MOREX.R3.3HG0288960 HORVU.MOREX.R3.5HG0480620 HORVU.MOREX.R3.5HG0488940 HORVU.MOREX.R3.6HG0560910 HORVU.MOREX.R3.6HG0597760 HORVU.MOREX.R3.7HG0680970 HORVU.MOR…
0.00205505271733906	3	263	25.6130881653992	Protein-containing complex assembly	http://amigo.geneontology.org/cgi-bin/amigo/term_details?term=GO:0065003	HORVU.MOREX.R3.6HG0606940 HORVU.MOREX.R3.5HG0480620 HORVU.MOREX.R3.6HG0560910
6.47219655063481e-11	11	974	25.3588857161191	Carbohydrate metabolic process	http://amigo.geneontology.org/cgi-bin/amigo/term_details?term=GO:0005975	HORVU.MOREX.R3.1HG0041280 HORVU.MOREX.R3.2HG0198790 HORVU.MOREX.R3.2HG0206500 HORVU.MOREX.R3.3HG0226040 HORVU.MOREX.R3.3HG0288960 HORVU.MOREX.R3.3HG0318260 HORVU.MOREX.R3.4HG0336280 HORVU.MOREX.R3.4HG0402760 HORVU.MOREX.R3.4HG0412200 HORVU.MOREX.R3.5HG0508190 HORVU.MOREX.R3.6HG0620820
0.00211285908769929	3	267	25.229371488764	Response to toxic substance	http://amigo.geneontology.org/cgi-bin/amigo/term_details?term=GO:0009636	HORVU.MOREX.R3.3HG0313690 HORVU.MOREX.R3.5HG0480620 HORVU.MOREX.R3.7HG0737470
0.00212573313766759	3	269	25.0417925185874	Regulation of cellular protein metabolic process	http://amigo.geneontology.org/cgi-bin/amigo/term_details?term=GO:0032268	HORVU.MOREX.R3.2HG0122090 HORVU.MOREX.R3.3HG0222530 HORVU.MOREX.R3.5HG0520550
0.0121124193048379	2	188	23.887383643617	Cell wall organization	http://amigo.geneontology.org/cgi-bin/amigo/term_details?term=GO:0071555	HORVU.MOREX.R3.1HG0041280 HORVU.MOREX.R3.2HG0193180
0.0121967813166758	2	190	23.6359375	Carbohydrate catabolic process	http://amigo.geneontology.org/cgi-bin/amigo/term_details?term=GO:0016052	HORVU.MOREX.R3.2HG0206500 HORVU.MOREX.R3.5HG0508190
0.0121967813166758	2	190	23.6359375	Cellular oxidant detoxification	http://amigo.geneontology.org/cgi-bin/amigo/term_details?term=GO:0098869	HORVU.MOREX.R3.5HG0480620 HORVU.MOREX.R3.7HG0737470
0.00234827123594249	3	287	23.4712271341463	Positive regulation of cellular metabolic process	http://amigo.geneontology.org/cgi-bin/amigo/term_details?term=GO:0031325	HORVU.MOREX.R3.5HG0448530 HORVU.MOREX.R3.5HG0480620 HORVU.MOREX.R3.5HG0520550
2.46106629846515e-13	14	1388	22.6482686419308	Cellular component organization	http://amigo.geneontology.org/cgi-bin/amigo/term_details?term=GO:0016043	HORVU.MOREX.R3.2HG0166260 HORVU.MOREX.R3.6HG0606940 HORVU.MOREX.R3.5HG0520550 HORVU.MOREX.R3.1HG0041280 HORVU.MOREX.R3.1HG0065530 HORVU.MOREX.R3.2HG0193180 HORVU.MOREX.R3.3HG0256040 HORVU.MOREX.R3.5HG0480620 HORVU.MOREX.R3.6HG0560910 HORVU.MOREX.R3.6HG0597760 HORVU.MOREX.R3.7HG0680970 HORVU.MOREX.R3.7HG0641130 HORVU.MOREX.R3.1HG0055820 HORVU.MOREX.R3.4HG0341820
1.78011611934648e-08	9	921	21.9421569625407	Organelle organization	http://amigo.geneontology.org/cgi-bin/amigo/term_details?term=GO:0006996	HORVU.MOREX.R3.2HG0166260 HORVU.MOREX.R3.5HG0520550 HORVU.MOREX.R3.1HG0065530 HORVU.MOREX.R3.3HG0256040 HORVU.MOREX.R3.6HG0560910 HORVU.MOREX.R3.7HG0680970 HORVU.MOREX.R3.7HG0641130 HORVU.MOREX.R3.1HG0055820 HORVU.MOREX.R3.4HG0341820
0.00267669076543811	3	307	21.9421569625407	Response to oxidative stress	http://amigo.geneontology.org/cgi-bin/amigo/term_details?term=GO:0006979	HORVU.MOREX.R3.1HG0057590 HORVU.MOREX.R3.5HG0480620 HORVU.MOREX.R3.7HG0737470
0.0029566761962823	3	328	20.537323742378	Negative regulation of cellular process	http://amigo.geneontology.org/cgi-bin/amigo/term_details?term=GO:0048523	HORVU.MOREX.R3.3HG0222530 HORVU.MOREX.R3.5HG0480620 HORVU.MOREX.R3.5HG0520550
0.0130898161968644	2	219	20.5060644977169	Positive regulation of nucleobase-containing compound metabolic process	http://amigo.geneontology.org/cgi-bin/amigo/term_details?term=GO:0045935	HORVU.MOREX.R3.5HG0448530 HORVU.MOREX.R3.5HG0520550
0.0134946907431774	2	224	20.04833984375	Anatomical structure morphogenesis	http://amigo.geneontology.org/cgi-bin/amigo/term_details?term=GO:0009653	HORVU.MOREX.R3.1HG0055820 HORVU.MOREX.R3.3HG0243220
0.0143844679017336	2	243	18.4807741769547	Cellular protein-containing complex assembly	http://amigo.geneontology.org/cgi-bin/amigo/term_details?term=GO:0034622	HORVU.MOREX.R3.6HG0606940 HORVU.MOREX.R3.6HG0560910
0.00474496237665722	3	408	16.5103975183824	Chromosome organization	http://amigo.geneontology.org/cgi-bin/amigo/term_details?term=GO:0051276	HORVU.MOREX.R3.5HG0520550 HORVU.MOREX.R3.1HG0065530 HORVU.MOREX.R3.3HG0256040
6.25158683578765e-05	6	894	15.0698930369128	Organic substance catabolic process	http://amigo.geneontology.org/cgi-bin/amigo/term_details?term=GO:1901575	HORVU.MOREX.R3.1HG0073500 HORVU.MOREX.R3.2HG0158150 HORVU.MOREX.R3.2HG0206500 HORVU.MOREX.R3.3HG0302570 HORVU.MOREX.R3.3HG0318260 HORVU.MOREX.R3.5HG0508190
0.00662623798129123	3	465	14.4865423387097	Generation of precursor metabolites and energy	http://amigo.geneontology.org/cgi-bin/amigo/term_details?term=GO:0006091	HORVU.MOREX.R3.6HG0606940 HORVU.MOREX.R3.5HG0508190 HORVU.MOREX.R3.7HG0664720
0.00694463502674812	3	476	14.1517693014706	Small molecule biosynthetic process	http://amigo.geneontology.org/cgi-bin/amigo/term_details?term=GO:0044283	HORVU.MOREX.R3.1HG0057590 HORVU.MOREX.R3.1HG0083320 HORVU.MOREX.R3.5HG0500680
1.75937958862502e-05	7	1129	13.9219649579274	Catabolic process	http://amigo.geneontology.org/cgi-bin/amigo/term_details?term=GO:0009056	HORVU.MOREX.R3.1HG0073500 HORVU.MOREX.R3.2HG0158150 HORVU.MOREX.R3.2HG0206500 HORVU.MOREX.R3.3HG0302570 HORVU.MOREX.R3.3HG0318260 HORVU.MOREX.R3.5HG0508190 HORVU.MOREX.R3.7HG0737470
0.0185056681444223	2	323	13.9034926470588	Monocarboxylic acid metabolic process	http://amigo.geneontology.org/cgi-bin/amigo/term_details?term=GO:0032787	HORVU.MOREX.R3.5HG0500680 HORVU.MOREX.R3.5HG0508190
0.000125752055887958	6	1024	13.1567230224609	Response to chemical	http://amigo.geneontology.org/cgi-bin/amigo/term_details?term=GO:0042221	HORVU.MOREX.R3.1HG0057590 HORVU.MOREX.R3.1HG0065530 HORVU.MOREX.R3.3HG0313690 HORVU.MOREX.R3.5HG0430490 HORVU.MOREX.R3.5HG0480620 HORVU.MOREX.R3.7HG0737470
0.00265735164519648	4	735	12.2199404761905	Carboxylic acid metabolic process	http://amigo.geneontology.org/cgi-bin/amigo/term_details?term=GO:0019752	HORVU.MOREX.R3.1HG0083320 HORVU.MOREX.R3.2HG0149510 HORVU.MOREX.R3.5HG0500680 HORVU.MOREX.R3.5HG0508190
0.000742054975730959	5	934	12.020417893469	Cellular catabolic process	http://amigo.geneontology.org/cgi-bin/amigo/term_details?term=GO:0044248	HORVU.MOREX.R3.1HG0073500 HORVU.MOREX.R3.2HG0158150 HORVU.MOREX.R3.2HG0206500 HORVU.MOREX.R3.3HG0302570 HORVU.MOREX.R3.7HG0737470
0.0107962923047854	3	588	11.4561941964286	Reproductive process	http://amigo.geneontology.org/cgi-bin/amigo/term_details?term=GO:0022414	HORVU.MOREX.R3.7HG0641130 HORVU.MOREX.R3.3HG0243220 HORVU.MOREX.R3.5HG0520550
0.000896542387755127	5	988	11.3634314903846	Proteolysis	http://amigo.geneontology.org/cgi-bin/amigo/term_details?term=GO:0006508	HORVU.MOREX.R3.1HG0075730 HORVU.MOREX.R3.3HG0222530 HORVU.MOREX.R3.3HG0274060 HORVU.MOREX.R3.5HG0462580 HORVU.MOREX.R3.6HG0620630
0.0108384187710072	3	598	11.2646190426421	Organophosphate metabolic process	http://amigo.geneontology.org/cgi-bin/amigo/term_details?term=GO:0019637	HORVU.MOREX.R3.3HG0318260 HORVU.MOREX.R3.1HG0057590 HORVU.MOREX.R3.5HG0508190
0.00223523028558424	5	1272	8.82631313875786	Small molecule metabolic process	http://amigo.geneontology.org/cgi-bin/amigo/term_details?term=GO:0044281	HORVU.MOREX.R3.1HG0057590 HORVU.MOREX.R3.1HG0083320 HORVU.MOREX.R3.2HG0149510 HORVU.MOREX.R3.5HG0500680 HORVU.MOREX.R3.5HG0508190
0.00642744208765696	4	1020	8.80554534313725	Anatomical structure development	http://amigo.geneontology.org/cgi-bin/amigo/term_details?term=GO:0048856	HORVU.MOREX.R3.1HG0055820 HORVU.MOREX.R3.7HG0641130 HORVU.MOREX.R3.3HG0243220 HORVU.MOREX.R3.5HG0520550
0.00267669076543811	5	1371	8.18896448760029	Transmembrane transport	http://amigo.geneontology.org/cgi-bin/amigo/term_details?term=GO:0055085	HORVU.MOREX.R3.5HG0471790 HORVU.MOREX.R3.1HG0041600 HORVU.MOREX.R3.2HG0105020 HORVU.MOREX.R3.3HG0255230 HORVU.MOREX.R3.5HG0467820
0.0150664379918379	3	830	8.11595444277108	Organic substance transport	http://amigo.geneontology.org/cgi-bin/amigo/term_details?term=GO:0071702	HORVU.MOREX.R3.5HG0471790 HORVU.MOREX.R3.1HG0041600 HORVU.MOREX.R3.5HG0496010
0.000383102968934196	7	1947	8.07288055341551	Response to stress	http://amigo.geneontology.org/cgi-bin/amigo/term_details?term=GO:0006950	HORVU.MOREX.R3.1HG0057590 HORVU.MOREX.R3.1HG0065530 HORVU.MOREX.R3.2HG0096080 HORVU.MOREX.R3.5HG0479680 HORVU.MOREX.R3.5HG0480620 HORVU.MOREX.R3.6HG0632840 HORVU.MOREX.R3.7HG0737470
0.00223523028558424	6	1971	6.8353548325723	Phosphorylation	http://amigo.geneontology.org/cgi-bin/amigo/term_details?term=GO:0016310	HORVU.MOREX.R3.1HG0012160 HORVU.MOREX.R3.1HG0057590 HORVU.MOREX.R3.4HG0353940 HORVU.MOREX.R3.5HG0420330 HORVU.MOREX.R3.5HG0508190 HORVU.MOREX.R3.5HG0520550
0.00733036336050992	5	1820	6.16871995192308	Regulation of nucleobase-containing compound metabolic process	http://amigo.geneontology.org/cgi-bin/amigo/term_details?term=GO:0019219	HORVU.MOREX.R3.5HG0448530 HORVU.MOREX.R3.3HG0279110 HORVU.MOREX.R3.5HG0488940 HORVU.MOREX.R3.7HG0680970 HORVU.MOREX.R3.5HG0520550
0.00771328772592916	5	1881	5.96867108585859	Regulation of macromolecule biosynthetic process	http://amigo.geneontology.org/cgi-bin/amigo/term_details?term=GO:0010556	HORVU.MOREX.R3.5HG0448530 HORVU.MOREX.R3.2HG0122090 HORVU.MOREX.R3.3HG0279110 HORVU.MOREX.R3.5HG0488940 HORVU.MOREX.R3.7HG0680970
0.0153200731500457	4	1639	5.47996110433191	Protein phosphorylation	http://amigo.geneontology.org/cgi-bin/amigo/term_details?term=GO:0006468	HORVU.MOREX.R3.1HG0012160 HORVU.MOREX.R3.4HG0353940 HORVU.MOREX.R3.5HG0420330 HORVU.MOREX.R3.5HG0520550
0.0173715590432571	4	1772	5.06865476862302	Regulation of transcription, DNA-templated	http://amigo.geneontology.org/cgi-bin/amigo/term_details?term=GO:0006355	HORVU.MOREX.R3.5HG0448530 HORVU.MOREX.R3.3HG0279110 HORVU.MOREX.R3.5HG0488940 HORVU.MOREX.R3.7HG0680970
Down	MF
Enrichment FDR	nGenes	Pathway Genes	Fold Enrichment	Pathway	URL	Genes
0.00138688372931578	1	8	2763.58653846154	UDP-galactosyltransferase activity	http://amigo.geneontology.org/cgi-bin/amigo/term_details?term=GO:0035250	HORVU.MOREX.R3.4HG0346410
0.00148588481452434	1	10	2210.86923076923	Glycerophosphodiester phosphodiesterase activity	http://amigo.geneontology.org/cgi-bin/amigo/term_details?term=GO:0008889	HORVU.MOREX.R3.3HG0296450
0.00254187720302991	1	22	1004.94055944056	Protein tyrosine kinase activity	http://amigo.geneontology.org/cgi-bin/amigo/term_details?term=GO:0004713	HORVU.MOREX.R3.3HG0307340
0.00590568640604691	1	91	242.952662721894	Calmodulin binding	http://amigo.geneontology.org/cgi-bin/amigo/term_details?term=GO:0005516	HORVU.MOREX.R3.5HG0443870
0.000649869482664094	2	348	127.061450044209	Phosphoric ester hydrolase activity	http://amigo.geneontology.org/cgi-bin/amigo/term_details?term=GO:0042578	HORVU.MOREX.R3.3HG0285550 HORVU.MOREX.R3.3HG0296450
0.00112607364961927	2	513	86.1937321937322	Sequence-specific DNA binding	http://amigo.geneontology.org/cgi-bin/amigo/term_details?term=GO:0043565	HORVU.MOREX.R3.5HG0443870 HORVU.MOREX.R3.2HG0114150
0.0167169780117703	1	290	76.2368700265252	Phosphatase activity	http://amigo.geneontology.org/cgi-bin/amigo/term_details?term=GO:0016791	HORVU.MOREX.R3.3HG0285550
0.00015296693683903	3	992	66.8609646401985	DNA-binding transcription factor activity	http://amigo.geneontology.org/cgi-bin/amigo/term_details?term=GO:0003700	HORVU.MOREX.R3.5HG0443870 HORVU.MOREX.R3.2HG0114150 HORVU.MOREX.R3.7HG0726850
0.0277237461305596	1	539	41.017982017982	Protein serine/threonine kinase activity	http://amigo.geneontology.org/cgi-bin/amigo/term_details?term=GO:0004674	HORVU.MOREX.R3.2HG0102910
0.00484515032324193	2	1601	27.6186037572671	Protein kinase activity	http://amigo.geneontology.org/cgi-bin/amigo/term_details?term=GO:0004672	HORVU.MOREX.R3.2HG0102910 HORVU.MOREX.R3.3HG0307340
Down	BioP
Enrichment FDR	nGenes	Pathway Genes	Fold Enrichment	Pathway	URL	Genes
0.00176382794847457	1	6	3684.78205128205	Salicylic acid biosynthetic process	http://amigo.geneontology.org/cgi-bin/amigo/term_details?term=GO:0009697	HORVU.MOREX.R3.5HG0443870
0.00180053677622918	1	7	3158.38461538462	Anion homeostasis	http://amigo.geneontology.org/cgi-bin/amigo/term_details?term=GO:0055081	HORVU.MOREX.R3.7HG0699680
0.00217870983944623	1	9	2456.52136752137	Cellular response to cold	http://amigo.geneontology.org/cgi-bin/amigo/term_details?term=GO:0070417	HORVU.MOREX.R3.2HG0125510
0.00268358177597795	1	15	1473.91282051282	Alditol metabolic process	http://amigo.geneontology.org/cgi-bin/amigo/term_details?term=GO:0019400	HORVU.MOREX.R3.3HG0296450
0.00540455794451851	1	46	480.623745819398	Glycolipid biosynthetic process	http://amigo.geneontology.org/cgi-bin/amigo/term_details?term=GO:0009247	HORVU.MOREX.R3.4HG0346410
0.000571163737183927	2	122	362.437578814628	Organic hydroxy compound metabolic process	http://amigo.geneontology.org/cgi-bin/amigo/term_details?term=GO:1901615	HORVU.MOREX.R3.5HG0443870 HORVU.MOREX.R3.3HG0296450
0.00781285405619346	1	96	230.298878205128	Negative regulation of transcription, DNA-templated	http://amigo.geneontology.org/cgi-bin/amigo/term_details?term=GO:0045892	HORVU.MOREX.R3.2HG0114150
0.0165040065542015	1	258	85.6926058437686	Dephosphorylation	http://amigo.geneontology.org/cgi-bin/amigo/term_details?term=GO:0016311	HORVU.MOREX.R3.3HG0285550
0.00249461370721227	2	770	57.4251748251748	Lipid metabolic process	http://amigo.geneontology.org/cgi-bin/amigo/term_details?term=GO:0006629	HORVU.MOREX.R3.3HG0296450 HORVU.MOREX.R3.4HG0346410
0.000571163737183927	3	1881	35.2610722610723	Regulation of macromolecule biosynthetic process	http://amigo.geneontology.org/cgi-bin/amigo/term_details?term=GO:0010556	HORVU.MOREX.R3.2HG0114150 HORVU.MOREX.R3.5HG0443870 HORVU.MOREX.R3.7HG0726850
0.000571163737183927	3	1903	34.853429807187	Regulation of cellular biosynthetic process	http://amigo.geneontology.org/cgi-bin/amigo/term_details?term=GO:0031326	HORVU.MOREX.R3.5HG0443870 HORVU.MOREX.R3.2HG0114150 HORVU.MOREX.R3.7HG0726850
0.00548174063707505	2	1639	26.9782700520956	Protein phosphorylation	http://amigo.geneontology.org/cgi-bin/amigo/term_details?term=GO:0006468	HORVU.MOREX.R3.2HG0102910 HORVU.MOREX.R3.3HG0307340
