# Supplementary material for: Comparative Analysis of the Effect of Gamma-, Electron, and Proton Irradiation on Transcriptomic Profile of Hordeum vulgare L. Seedlings: In Search for Molecular Contributors to Abiotic Stress Resilience
Source: Plants (Basel). 2024 Jan 23;13(3):342. doi: 10.3390/plants13030342 (PMC10857502; doi:10.3390/plants13030342)
Supplement: Supplementary file 1 [file plants-13-00342-s001.zip › Supplementary table S3_20 groups of protein products.xlsx]

## Sheet: Common DEGs
Common DEGs distributed into groups of most typical responses to ionising radiation exposure
ID	Gamma and protons	Gamma and electrons	Protons and electrons	Description
MOBILE GENETIC ELEMENTS
A0A8I6WHA7	+			Retrovirus-related Pol polyprotein from transposon TNT 1-94
AMINO ACID AND PROTEIN METABOLISM
A0A287L592	+	+	+	Aspartic proteinase oryzasin-1;Cathepsin D (Lysosomal aspartyl protease),
F2D4Q6			+	Threonine synthase
A0A8I6XX56		+		8-amino-7-oxononanoate synthase-like; Aminotransferase, classes I and II family protein, expressed; Biotin F; Long chain base biosynthesis protein 2b; Serine C-palmitoyltransferase; 8-amino-7-oxononanoate sythase
F2DEI9	+			Tryptophan aminotransferase-related protein 4;Alliin lyase;Putative pyridoxal phosphate-dependent transferase
PROTEIN CATABOLISM
A0A8I6Y7Y0	+	+	+	Subtilisin-like protease
B4ESE6			+	Cysteine protease XCP1;Xylem cysteine proteinase 1;Cysteine proteinase CP1
	+	+	+	ATP-dependent Clp protease proteolytic subunit
A0A287L592	+	+	+	Aspartic proteinase oryzasin-1;Cathepsin D (Lysosomal aspartyl protease)
A0A8I6X8D3			+	Subtilisin-like protease;Peptidase S8/S53 domain
REGULATION OF TRANSCRIPTION
F2D6W9	+	+	+	NAC domain-containing protein
A0A287QRJ0			+	SWIB domain-containing protein;Brg-1 associated factor;Upstream activation factor subunit spp27;SWIB/MDM2 domain
M0W973			+	probable RNA-binding protein ARP1 isoform X1;RRM domain-containing protein
A0A8I6XIM1			+	NAC-A/B domain-containing protein
F2E6W2	+	+	+	SWIB domain-containing protein;Upstream activation factor subunit spp27 like;p53 negative regulator;Putative transcription regulator SWI/SNF-BAF60b family;SWIB/MDM2 domain
A0A8I6YMI0	+	+	+	PAZ domain-containing protein
F2DID9			+	Putative WRKY transcription factor 19
A0A8I6Z5G7			+	Protein PHOSPHATE STARVATION RESPONSE 3;HTH myb-type domain-containing protein
F2DCM1			+	HTH myb-type domain-containing protein;Transcription factor NIGT1;myb family transcription factor EFM;Two-component response regulator ORR24;Two-component response regulator ARR2
SIGNAL TRANSDUCTION
A0A287EMU9	+	+	+	Protein kinase domain-containing protein
A0A8I6XGZ6			+	Protein kinase domain-containing protein
A0A287EMU9	+	+	+	Protein kinase domain-containing protein
A0A8I6X754			+	Protein kinase domain-containing protein
F2CU13			+	Calcium-dependent lipid-binding family protein;31 kDa ribonucleoprotein, chloroplastic
A0A8I6WAH8			+	Putative GTP-binding protein OBGC1, chloroplastic;GTP-binding protein OBGC chloroplastic
M0XEP0		+		Phosphatidylinositol N-acetyglucosaminlytransferase subunit P-related
A0A8I6XHW3			+	probable serine/threonine-protein kinase PBL5 isoform X1;probable serine/threonine-protein kinase RLCKVII;probable serine/threonine-protein kinase PBL16;probable serine/threonine-protein kinase PBL9;probable serine/threonine-protein kinase PBL24;Proline-rich receptor-like protein kinase PERK13;Protein kinase domain-containing protein;probable serine/threonine-protein kinase PBL8;Proline-rich rece…
A0A8I7BAX9		+		Protein kinase domain-containing protein
A0A8I7BG40		+		Protein kinase domain-containing protein
CARBOHYDRATE METABOLISM
M0Y842			+	Glycerol-3-phosphate dehydrogenase [NAD(+)];Probable glycerol-3-phosphate dehydrogenase [NAD(+)] 1, cytosolic
			+	lysine-rich arabinogalactan protein 18-like
A0A8I6XP76			+	GH10 domain-containing protein;Putative (1,4)-beta-xylan endohydrolase;Putative Pol polyprotein from transposon element Bs1
A0A8I7B398			+	UDP-N-acetylmuramoyl-L-alanyl-D-glutamate--2, 6-diaminopimelate ligase
A0A8I6XRA6			+	beta-xylosidase/alpha-L-arabinofuranosidase 2-like;Beta-xylosidase/alpha-L-arabinofuranosidase 2;Beta-D-xylosidase 4
D9IXC7	+	+	+	Cellulose synthase
F2DMG1	+	+	+	Cellulose synthase
F2CSG2		+		Cellulose synthase
A0A8I6X4I5	+	+	+	Beta-galactosidase
A0A8I6XL67			+	Polygalacturonase
F2DVJ4			+	Pyruvate dehydrogenase E1 component subunit beta
A0A8I6X8L4		+		Pyruvate kinase
A0A8I7B8L0	+	+	+	Dihydrolipoamide acetyltransferase component of pyruvate dehydrogenase complex
LIPID METABOLISM
A0A8I6Y310	+			CRAL/TRIO domain containing protein, expressed;CRAL-TRIO domain-containing protein;Random slug protein 5;Sec14p-like phosphatidylinositol transfer family protein isoform 1
F2DN84	+			short-chain dehydrogenase cctT-like;NADPH-dependent 1-acyldihydroxyacetone phosphate reductase;11-beta-hydroxysteroid dehydrogenase-like 4B;NADPH-dependent 1-acyldihydroxyacetone phosphate reductase-like;short-chain dehydrogenase RED1;NAD(P)-binding rossmann-fold protein
A0A8I6WPB7		+		Lipase_3 domain-containing protein
A0A8I6XYN3			+	Glycerophosphodiester phosphodiesterase
A0A8I6WZ62			+	Monogalactosyldiacylglycerol synthase
CIRCADIAN
A0A8I7BCP4	+	+	+	High molecular mass early light-inducible protein HV58, chloroplastic
CELL WALL METABOLISM
A0A287KQB5	+	+	+	Germin-like protein 5-1;Cupin type-1 domain-containing protein
F2DQ90			+	Pectin acetylesterase
A0A287JYZ4			+	Bowman-Birk type trypsin inhibitor
D9IXC7	+	+	+	Cellulose synthase
F2DMG1	+	+	+	Cellulose synthase
F2CSG2		+		Cellulose synthase
F2DXF2	+	+	+	Laccase
F2D9J2	+	+	+	Laccase
A0A8I6X4I5	+	+	+	Beta-galactosidase
F2D6W9	+	+	+	NAC domain-containing protein
DEFENSE RESPONSE
F2D4L0			+	Glutathione transferase
A0A8I6WJJ4			+	Glutathione transferase
A0A287JYZ4			+	Bowman-Birk type trypsin inhibitor
A0A8I6WZG9			+	NB-ARC domain-containing protein;Disease resistance protein RGA2;AAA domain-containing protein
A0A287KQB5	+	+	+	Germin-like protein 5-1;Cupin type-1 domain-containing protein
A0A8I6YN10	+	+	+	PMR5N domain-containing protein
A0A8I7B1I0			+	AB hydrolase-1 domain-containing protein
ABIOTIC STRESS RESPONSE
A0A8I6WYP3			+	thioredoxin-like protein CITRX, chloroplastic;Thioredoxin-like protein CITRX;Thioredoxin domain-containing protein;Thioredoxin, conserved site
F2DY59	+			Heat shock protein 90-5, chloroplastic;Endoplasmin
A0A8I6WKB0			+	Glycine-rich protein 2b;Cold shock protein 1;Putative RNA-binding protein containing PIN domain and invovled in translation or RNA processing;CSD domain-containing protein;Glycine-rich protein 2;glycine-rich protein 2-like
F2DDU3			+	20 kDa chaperonin, chloroplastic;Chaperonin, chloroplastic;Chaperonin
A0A8I7B4J8			+	HMA domain-containing protein
A0A8I6WZG9			+	NB-ARC domain-containing protein;Disease resistance protein RGA2;AAA domain-containing protein
A0A8I6X090			+	Clp R domain-containing protein
ROS AND ANTIOXIDANT PROCESSES
A0A8I6WYP3			+	thioredoxin-like protein CITRX, chloroplastic;Thioredoxin-like protein CITRX;Thioredoxin domain-containing protein;Thioredoxin, conserved site
A0A8I6XH72			+	FAD/NAD(P)-binding oxidoreductase family protein
F2DXF2	+	+	+	Laccase
F2D9J2	+	+	+	Laccase
M0XLI1	+	+	+	Peroxidase
F2D4L0			+	Glutathione transferase
A0A8I6WJJ4			+	Glutathione transferase
A0A8I6WG88			+	Aquaporin PIP;Plasma membrane intrinsic protein
A0A287KQB5	+	+	+	Germin-like protein 5-1;Cupin type-1 domain-containing protein
M0XEM7	+	+	+	Protein CDI
A0A8I6XDH6	+	+	+	NAM-associated domain-containing protein, Glutathione-S-transferase T3-like protein
PHYTOHORMONES
A0A8I6YN81			+	auxin-responsive protein SAUR78;auxin-responsive protein SAUR77;auxin-responsive protein SAUR76;Auxin-responsive protein SAUR71;Small auxin-up RNA;SAUR-like auxin-responsive protein family;Small auxin up regulated protein
A0A8I6XJC3		+		GTP-binding protein BRASSINAZOLE INSENSITIVE PALE GREEN 2, chloroplastic;G domain-containing protein;NO-associated protein 1, chloroplastic/mitochondrial;GTP binding domain
TRANSPORT
A0A8I6X571			+	probable envelope ADP,ATP carrier protein, chloroplastic;Mitochondrial solute carrier protein
A0A8I6WG88			+	Aquaporin PIP;Plasma membrane intrinsic protein
F2EED8			+	Peptide transporter PTR3-A
A0A8I6Z0C1			+	Chloroplast zebra-necrosis protein;Nickel/cobalt transporter, high-affinity;NicO domain-containing protein;Urease accessory protein UreH;High-affinity nickel-transport family protein
A0A8I6XNJ0		+		ABC transporter B family member 11
A0A8I6WX86	+	+	+	Protein transport protein sec16
A0A8I6X571			+	-predicted envelope ADP,ATP carrier protein, chloroplastic; mitochondrial solute carrier protein
A0A8I6WG88			+	Aquaporin PIP;Plasma membrane intrinsic protein
A0A8I6XPA9			+	TPT domain-containing protein
A0A8I6YV77	+			Protein NRT1/ PTR FAMILY 8.3
A0A8I6XRW4	+		+	Trigger factor
M0UTP3			+	putative glycerol-3-phosphate transporter 1;MFS domain-containing protein;Phosphate starvation-induced protein 3 isoform 1
NUCLEIC ACID-RELATED PROCESSES
F2CXV3	+	+	+	Nucleoside diphosphate kinase
F2EE11			+	Putative 28S rRNA (Cytosine-C(5))-methyltransferase (Fragment);NOL1/NOP2/sun family protein / antitermination NusB domain-containing protein;Ribosomal RNA small subunit methyltransferase B
F2CWQ1	+	+	+	transcription termination factor MTERF6, chloroplastic/mitochondrial;mTERF domain-containing protein (Fragment)
A0A8I7B669		+		protein PLASTID TRANSCRIPTIONALLY ACTIVE 10;S1 motif domain-containing protein;Nucleic acid-binding, OB-fold-like protein isoform 1
A0A8I6X424			+	29 kDa ribonucleoprotein A, chloroplastic;RNA-binding protein CP29B, chloroplastic-like;RNA-binding protein CP29B chloroplastic;Ribonucleoprotein, chloroplastic;RNA recognition motif domain;RNA binding protein 1
F2E6W2	+	+	+	SWIB domain-containing protein;Upstream activation factor subunit spp27 like;p53 negative regulator;Putative transcription regulator SWI/SNF-BAF60b family;SWIB/MDM2 domain
A0A8I6XVS3			+	Radical SAM core domain-containing protein
			+	TRASH domain-containing protein;60S ribosomal protein L24
M0YRH6			+	Pentatricopeptide repeat-containing protein
A0A8I6YV57			+	Pentatricopeptide repeat-containing protein
A0A8I6XF01			+	Pentatricopeptide repeat-containing protein
A0A8I6XKH0			+	Pentatricopeptide repeat-containing protein
A0A8I6XKW8			+	Pentatricopeptide repeat-containing protein;Pentatricopeptide, putative;Putative tetratricopeptide-like helical domain, DYW domain-containing protein
			+	40S ribosomal protein S5;Small subunit ribosomal protein S5e
			+	40S ribosomal protein S13;Ribosomal protein S15
DNA REPAIR
A0A8I6YZJ2	+	+	+	NB-ARC domain-containing protein
A0A8I6WGY7			+	SAP domain-containing protein
F2E6W2	+	+	+	SWIB domain-containing protein;Upstream activation factor subunit spp27 like;p53 negative regulator;Putative transcription regulator SWI/SNF-BAF60b family;SWIB/MDM2 domain
PHOTOSYNTHESIS
			+	Chloroplast envelope protein translocase, IAP;Omp85 domain-containing protein;Translocon at the outer envelope membrane of chloroplasts 75-III
F2CWQ1	+	+	+	transcription termination factor MTERF6, chloroplastic/mitochondrial;mTERF domain-containing protein (Fragment
F2DDU3			+	20 kDa chaperonin, chloroplastic;Chaperonin, chloroplastic;Chaperonin
A0A8I7BCP4	+	+	+	High molecular mass early light-inducible protein HV58, chloroplastic
A0A8I6YCH8			+	Phytocyanin domain-containing protein
SECONDARY METABOLISM
A0A8I6XFC8			+	4-hydroxy-7-methoxy-3-oxo-3,4-dihydro-2H-1,4-benzoxazin-2-yl glucosidebeta-D-glucosidase
F2DXF2	+	+	+	Laccase
F2D9J2	+	+	+	Laccase
A0A8I7BAT6	+	+	+	Isoflavone reductase;NmrA domain-containing protein;Phenylcoumaran benzylic ether reductase
A0A8I6WX52	+			Phenylcoumaran benzylic ether reductase Pyrc5;Isoflavone reductase;NmrA domain-containing protein;Hopanoid-associated sugar epimerase
A0A8I6Z209	+	+		Phenylalanine ammonia-lyase
F2CVK3		+		Tyrosine/DOPA decarboxylase 2; Aromatic amino acid decarboxylase
A0A8I6Z209		+		Phenylalanine ammonia-lyase
A0A8I6WX52	+			Phenylcoumaran benzylic ether reductase Pyrc5;Isoflavone reductase;NmrA domain-containing protein;Hopanoid-associated sugar epimerase
A0A8I6WG11			+	Caffeoylshikimate esterase;Alpha/beta-Hydrolases superfamily protein
A0A8I6WX52	+			Phenylcoumaran benzylic ether reductase Pyrc5;Isoflavone reductase;NmrA domain-containing protein;Hopanoid-associated sugar epimerase
Q96565	+	+	+	3-aminomethylindole N-methyltransferase
A0A8I6XY07			+	DNA gyrase subunit B
M0V2A3	+			Flavonoid 3'-monooxygenase; trimethyltridecatetraene synthase-like
CELL CYCLE AND TRANSLATION
A0A8I6Y393			+	- Lactamase_B domain-containing protein,
A0A8I7B5J1			+	- NEP-interacting protein 1; tRNA-splicing ligase RtcB; Carboxyl-terminal peptidase
F2CXV3	+	+	+	60S ribosomal protein L31, Nucleoside diphosphate kinase
	+	+	+	40S ribosomal protein S16;Putative ribosomal protein S9;Small subunit ribosomal protein S16e
F2DEP3			+	60S ribosomal protein L12
A0A8I6Z1J9			+	S5 DRBM domain-containing protein;40S ribosomal protein S2-4
A0A8I6XW53	+	+	+	Ubiquitin;Ubiquitin-60S ribosomal protein L40-1
			+	40S ribosomal protein S17;Ribosomal protein S17e
			+	40S ribosomal protein S25
	+		+	Putative ribosomal protein S8;30S ribosomal protein S8, chloroplastic
			+	40S ribosomal protein S7
			+	40S ribosomal protein S11;Ribosomal protein S17;Small subunit ribosomal protein S11e
			+	Ribosomal protein L13a;Large subunit ribosomal protein L13Ae
			+	Ribosomal protein L3;Ribosomal protein L3B
A0A8I6WN72			+	Valine--tRNA ligase
A0A8I6WBS1			+	60S ribosomal protein L10;Large subunit ribosomal protein L10e
A0A8I7B533	+	+	+	PseudoU_synth_2 domain-containing protein
F2D101			+	Ribosomal protein L19
A0A8I7BG10			+	Smr domain-containing protein;Pentatricopeptide repeat-containing protein, chloroplastic;Salt-inducible protein;Pentatricopeptide, putative, expressed
			+	60S ribosomal protein L31;Large subunit ribosomal protein L31e;PfkB-like carbohydrate kinase family protein
F2CU13			+	Calcium-dependent lipid-binding family protein;31 kDa ribonucleoprotein, chloroplastic
A0A8I7B533	+	+	+	PseudoU_synth_2 domain-containing protein
A0A8I6Y635			+	Ribosomal protein L37
			+	40S ribosomal protein S5;Small subunit ribosomal protein S5e
F2CSC5			+	Ribosomal protein L19;60S ribosomal protein L19-2
			+	40S ribosomal protein S13;Ribosomal protein S15
			+	40S ribosomal protein S12
			+	KH type-2 domain-containing protein;40S ribosomal protein S3-3
A0A8I6Z1J9			+	S5 DRBM domain-containing protein;Ribosomal S subunit
A0A8I6Y635			+	Ribosomal protein L37
F2CSC5			+	Ribosomal protein L19;60S ribosomal protein L19-2
			+	40S ribosomal protein S12
	+	+	+	60S ribosomal protein L31
	+	+	+	40S ribosomal protein S8
		+	+	Putative ribosomal protein S8; 30S ribosomal protein S8, chloroplastic
		+	+	60S ribosomal protein L13
		+	+	60S ribosomal protein L44;Ribosomal protein L44e
A0A8I6XM30	+			Metacaspase-1;Putative transcription factor Znf-LSD family;Metacaspase 2
	+	+	+	60S acidic ribosomal protein P0
	+	+	+	40S ribosomal protein S25
	+	+	+	40S ribosomal protein S25
UNKNOWN /UNCERTAIN
A0A8I6XUR8			+	RAP domain-containing protein
A0A8I6WVE1			+	ArsA_ATPase domain-containing protein
A0A8I6WUG7			+	53EXOc domain-containing protein
F2CRH2	+	+	+	Elongation factor 1-alpha
			+	60S ribosomal protein L9
F2DB07	+	+	+	Predicted protein
F2D8J2			+	Predicted protein
F2DI93			+	Predicted protein
F2DD80			+	Predicted protein
F2D8Q1			+	Predicted protein
F2EG53			+	Predicted protein
F2D2U2			+	Predicted protein
F2E778			+	Predicted protein
A0A8I7B398			+	UDP-N-acetylmuramoyl-L-alanyl-D-glutamate--2, 6-diaminopimelate ligase
A0A8I6WJY6	+	+	+	Uncharacterized protein
M0XHX4			+	Uncharacterized protein
M0XQH7			+	Uncharacterized protein
F2E8Z9			+	DEAD-box ATP-dependent RNA helicase 47, mitochondrial
F2DVW7			+	Acyl carrier protein
	+	+	+	40S ribosomal protein S25
	+	+	+	60S acidic ribosomal protein P0
A0A8I6YZJ2	+	+	+	NB-ARC domain-containing protein
A0A8I6YMI0	+	+	+	PAZ domain-containing protein
	+	+	+	60S ribosomal protein L31
A0A8I6X913	+			Proline-rich protein
	+		+	60S ribosomal protein L13
	+		+	60S ribosomal protein L44;Ribosomal protein L44e
A0A8I6WWY3	+	+	+	Rx_N domain-containing protein
A0A8I6XM78			+	CRM domain-containing protein
M0XQH7			+	Uncharacterized protein
